# Supplementary material for: Nucleolar stress-induced heterochromatin disengagement triggers tumour intrinsic immunogenicity
Source: Research Square preprint supplement (doi:10.21203/rs.3.rs-6101102/v1), 2025-03-06
Supplement: Supplementary file 1 [file 44e0f8c5d8ee8ec7cc509e8f.xlsx]

## Sheet: Legend
Supplementary Table List
Supplementary Table 1. genome-wide CRISPR screen data under IFNγ treatment
Supplementary Table 2. genome-wide CRISPR screen data
Supplementary Table 3. nucleolomics-targeted CRISPR screen data under IFNγ treatment
Supplementary Table 4. nucleolomics-targeted CRISPR screen data
Supplementary Table 5. deubiquitinase-targeted CRISPR screen data under IFNγ treatment
Supplementary Table 6. deubiquitinase-targeted CRISPR screen data
Supplementary Table 7. sgRNA and shRNA sequences
Supplementary Table 8. primer sequence
Supplementary Table 9. reagent, antibodies
Supplementary Table 10. OTUD4 depletion-mediated ERV alteration.
Supplementary Table 11. ERV-encoded peptides predicted to bind MHC-I.
Supplementary Table 12. IP-Mass spectrometry data
Supplementary Table 13. Drug screen data

## Sheet: Table1 IFNγ-Genome wide
Supplementary Table 1, genome-wide CRISPR screen data under IFNγ treatment
id	num	neg|score	neg|p-value	neg|fdr	neg|rank	neg|goodsgrna	neg|lfc	pos|score	pos|p-value	pos|fdr	pos|rank	pos|goodsgrna	pos|lfc
Ccdc101	5	1	1	1	18406	0	2.6732	2.7479e-15	2.6896e-07	8.4e-05	1	5	2.6732
Fgfr2	5	1	1	1	18405	0	3.7568	8.8956e-15	2.6896e-07	8.4e-05	2	5	3.7568
Taf5l	5	1	1	1	18404	0	2.7822	2.371e-14	2.6896e-07	8.4e-05	3	5	2.7822
Tada1	5	1	1	1	18403	0	2.516	6.243e-14	2.6896e-07	8.4e-05	4	5	2.516
Stub1	5	1	1	1	18402	0	3.2093	9.0985e-14	2.6896e-07	8.4e-05	5	5	3.2093
Tada2b	5	1	1	1	18401	0	3.0028	4.3488e-13	2.6896e-07	8.4e-05	6	5	3.0028
Mgat1	5	1	1	1	18400	0	2.0002	7.0939e-13	2.6896e-07	8.4e-05	7	5	2.0002
Gata3	5	1	1	1	18399	0	2.5478	8.5935e-13	2.6896e-07	8.4e-05	8	5	2.5478
F8a	5	1	1	1	18398	0	1.9324	1.0926e-12	2.6896e-07	8.4e-05	9	5	1.9324
Slc35a2	5	1	1	1	18397	0	3.2466	2.9281e-12	2.6896e-07	8.4e-05	10	5	3.2466
Cog5	5	1	1	1	18396	0	2.2014	3.1325e-12	2.6896e-07	8.4e-05	11	5	2.2014
Cog3	5	1	1	1	18395	0	2.6887	3.898e-12	2.6896e-07	8.4e-05	12	5	2.6887
Mau2	5	1	1	1	18394	0	2.7964	2.0646e-11	2.6896e-07	8.4e-05	13	5	2.7964
Ago2	5	1	1	1	18393	0	1.9653	2.8e-11	2.6896e-07	8.4e-05	14	5	1.9653
Srrd	5	1	1	1	18392	0	1.5725	8.1401e-11	2.6896e-07	8.4e-05	15	5	1.5725
Nipbl	5	1	1	1	18391	0	2.0444	8.2833e-11	2.6896e-07	8.4e-05	16	5	2.0444
Cnot2	10	0.90924	0.95641	1	15570	1	1.3711	1.2253e-10	2.6896e-07	8.4e-05	17	9	1.3711
Tm9sf2	5	1	1	1	18345	0	2.2267	1.8756e-10	2.6896e-07	8.4e-05	18	5	2.2267
Get4	5	1	1	1	18390	0	1.9683	2.1494e-10	2.6896e-07	8.4e-05	19	5	1.9683
Socs1	5	1	1	1	18389	0	2.1072	2.4084e-10	2.6896e-07	8.4e-05	20	5	2.1072
Itga3	5	1	1	1	18388	0	1.859	2.8433e-10	2.6896e-07	8.4e-05	21	5	1.859
Tada3	5	0.76204	0.79228	1	12951	1	2.156	3.3718e-10	2.6896e-07	8.4e-05	22	4	2.156
Capzb	5	1	1	1	18387	0	2.1031	5.0659e-10	2.6896e-07	8.4e-05	23	5	2.1031
Surf4	5	1	1	1	18386	0	1.7836	5.2528e-10	2.6896e-07	8.4e-05	24	5	1.7836
Tmem165	5	1	1	1	18362	0	3.2396	6.7884e-10	2.6896e-07	8.4e-05	25	5	3.2396
Sel1l	5	1	1	1	18385	0	1.6784	6.9029e-10	2.6896e-07	8.4e-05	26	5	1.6784
Stk24	5	1	1	1	18384	0	1.1213	8.8796e-10	2.6896e-07	8.4e-05	27	5	1.1213
Hira	5	1	1	1	18383	0	2.2549	1.3455e-09	2.6896e-07	8.4e-05	28	5	2.2549
Scaf8	5	1	1	1	18382	0	1.6463	1.5743e-09	2.6896e-07	8.4e-05	29	5	1.6463
Pdcd10	4	1	1	1	18381	0	1.8958	1.701e-09	2.6896e-07	8.4e-05	30	4	1.8958
Med9	5	1	1	1	18379	0	1.771	2.0015e-09	2.6896e-07	8.4e-05	31	5	1.771
Ep300	5	1	1	1	18380	0	1.2944	2.5709e-09	2.6896e-07	8.4e-05	32	5	1.2944
Shoc2	5	1	1	1	18378	0	2.2651	3.0929e-09	2.6896e-07	8.4e-05	33	5	2.2651
Cog1	5	1	1	1	18377	0	1.7307	3.3121e-09	2.6896e-07	8.4e-05	34	5	1.7307
Taf6l	5	1	1	1	18376	0	1.3218	3.7673e-09	2.6896e-07	8.4e-05	35	5	1.3218
Caml	5	1	1	1	18375	0	2.0365	7.2142e-09	2.6896e-07	8.4e-05	36	5	2.0365
Tfap2a	5	1	1	1	18374	0	0.99049	9.0676e-09	2.6896e-07	8.4e-05	37	5	0.99049
Sap18	3	1	1	1	18373	0	2.7998	1.1428e-08	2.6896e-07	8.4e-05	38	3	2.7998
Deaf1	5	1	1	1	18372	0	1.0687	1.2391e-08	2.6896e-07	8.4e-05	39	5	1.0687
Ptpn11	5	0.99996	0.99996	1	18291	0	2.006	1.3729e-08	2.6896e-07	8.4e-05	40	5	2.006
Trim28	5	1	1	1	18371	0	1.7877	1.4294e-08	2.6896e-07	8.4e-05	41	5	1.7877
B3gnt2	5	1	1	1	18370	0	1.7767	1.4593e-08	2.6896e-07	8.4e-05	42	5	1.7767
Emc6	5	1	1	1	18369	0	1.1021	1.7546e-08	2.6896e-07	8.4e-05	43	5	1.1021
BC023829	5	0.99998	0.99998	1	18307	0	2.364	1.9003e-08	2.6896e-07	8.4e-05	44	5	2.364
Ndnl2	5	1	1	1	18368	0	0.96075	2.0739e-08	2.6896e-07	8.4e-05	45	5	0.96075
Wrb	5	1	1	1	18367	0	1.9295	2.1081e-08	2.6896e-07	8.4e-05	46	5	1.9295
Med29	5	1	1	1	18366	0	1.3818	2.681e-08	2.6896e-07	8.4e-05	47	5	1.3818
Mrgbp	5	1	1	1	18352	0	2.1815	2.7186e-08	2.6896e-07	8.4e-05	48	5	2.1815
Prmt1	5	1	1	1	18346	0	1.7398	2.8332e-08	2.6896e-07	8.4e-05	49	5	1.7398
Med25	5	1	1	1	18365	0	1.5811	4.0576e-08	2.6896e-07	8.4e-05	50	5	1.5811
Ap2s1	5	1	1	1	18364	0	0.8871	5.3494e-08	2.6896e-07	8.4e-05	51	5	0.8871
Elavl1	5	1	1	1	18363	0	1.6084	5.7076e-08	2.6896e-07	8.4e-05	52	5	1.6084
Pgap2	5	1	1	1	18361	0	1.0643	6.9301e-08	2.6896e-07	8.4e-05	53	5	1.0643
Med15	5	0.99885	0.99885	1	18125	0	1.4966	8.1953e-08	2.6896e-07	8.4e-05	54	5	1.4966
Supt20	5	0.99993	0.99993	1	18270	0	2.041	8.9622e-08	2.6896e-07	8.4e-05	55	5	2.041
Ccdc132	5	0.99135	0.99144	1	17729	0	1.231	9.7084e-08	2.6896e-07	8.4e-05	56	4	1.231
Mapk1	5	1	1	1	18360	0	1.6208	9.9741e-08	2.6896e-07	8.4e-05	57	5	1.6208
Alg12	5	1	1	1	18359	0	1.2398	1.0474e-07	2.6896e-07	8.4e-05	58	5	1.2398
Zfp706	5	0.99913	0.99913	1	18146	0	1.23	1.3121e-07	2.6896e-07	8.4e-05	59	5	1.23
Emc8	5	1	1	1	18334	0	1.3566	1.4256e-07	8.0688e-07	0.000218	60	5	1.3566
Huwe1	5	1	1	1	18358	0	1.1717	1.447e-07	8.0688e-07	0.000218	61	5	1.1717
Mgat2	5	1	1	1	18357	0	1.5098	1.5084e-07	8.0688e-07	0.000218	62	5	1.5098
Cog7	5	1	1	1	18349	0	1.6451	1.9426e-07	8.0688e-07	0.000218	63	5	1.6451
Cabin1	5	0.99998	0.99998	1	18306	0	1.2506	1.9986e-07	8.0688e-07	0.000218	64	5	1.2506
Brpf1	5	1	1	1	18353	0	1.1574	2.4321e-07	8.0688e-07	0.000218	65	5	1.1574
Emc7	5	1	1	1	18356	0	1.1402	2.6599e-07	8.0688e-07	0.000218	66	5	1.1402
Cog4	5	1	1	1	18355	0	0.98344	2.6861e-07	8.0688e-07	0.000218	67	5	0.98344
Cyb5b	5	1	1	1	18354	0	0.81752	2.8607e-07	8.0688e-07	0.000218	68	5	0.81752
Traf3	5	0.99991	0.99991	1	18256	0	1.9769	3.3728e-07	1.3448e-06	0.00033	69	5	1.9769
Prrc2a	5	0.99999	0.99999	1	18319	0	1.8747	3.4786e-07	1.3448e-06	0.00033	70	5	1.8747
Sox9	5	0.99423	0.99424	1	17848	0	1.0916	3.5832e-07	1.3448e-06	0.00033	71	4	1.0916
Zeb2	5	1	1	1	18351	0	0.77283	4.0225e-07	1.3448e-06	0.00033	72	5	0.77283
Cab39	5	0.99908	0.99907	1	18142	0	1.4839	4.3252e-07	1.3448e-06	0.00033	73	5	1.4839
Hgs	5	0.94119	0.94144	1	16321	0	1.1912	4.4269e-07	1.3448e-06	0.00033	74	4	1.1912
Tmem199	5	0.84818	0.85139	1	14270	1	1.6182	4.5072e-07	1.3448e-06	0.00033	75	4	1.6182
Csrnp1	5	1	1	1	18350	0	0.76545	4.8482e-07	1.6138e-06	0.000391	76	5	0.76545
Fam49b	5	0.81708	0.82773	1	13733	1	1.1738	5.5516e-07	1.8827e-06	0.000439	77	4	1.1738
Katnb1	5	0.99999	0.99999	1	18326	0	1.2907	6.0465e-07	1.8827e-06	0.000439	78	5	1.2907
Pigs	5	0.99991	0.99991	1	18255	0	0.96481	6.0753e-07	1.8827e-06	0.000439	79	5	0.96481
Usp22	5	0.99999	0.99999	1	18320	0	1.1564	6.4746e-07	2.4206e-06	0.00055	80	5	1.1564
Sec11a	5	0.99987	0.99987	1	18241	0	1.516	6.505e-07	2.4206e-06	0.00055	81	5	1.516
Med12	5	1	1	1	18344	0	1.8798	8.5196e-07	3.4965e-06	0.000748	82	5	1.8798
Smc5	5	1	1	1	18348	0	0.83546	8.5597e-07	3.4965e-06	0.000748	83	5	0.83546
Supt7l	5	0.99385	0.99386	1	17831	0	0.90376	8.6599e-07	3.4965e-06	0.000748	84	4	0.90376
Htt	5	0.72962	0.77439	1	12608	1	1.0421	8.8497e-07	3.4965e-06	0.000748	85	4	1.0421
Sec63	5	0.97678	0.97691	1	17236	0	1.1651	8.9457e-07	3.4965e-06	0.000748	86	4	1.1651
Nf2	5	1	1	1	18347	0	1.2178	9.5064e-07	4.0344e-06	0.000782	87	5	1.2178
Arid2	5	0.99993	0.99993	1	18271	0	1.1659	1.0086e-06	4.0344e-06	0.000782	88	5	1.1659
Lsm10	5	1	0.99999	1	18330	0	1.3881	1.0118e-06	4.0344e-06	0.000782	89	5	1.3881
Cog2	5	0.22063	0.40363	1	6308	1	1.3169	1.0181e-06	4.0344e-06	0.000782	90	4	1.3169
Golph3	5	0.99988	0.99989	1	18244	0	1.4408	1.0352e-06	4.0344e-06	0.000782	91	5	1.4408
Rab14	5	0.99999	0.99999	1	18311	0	1.2195	1.0428e-06	4.0344e-06	0.000782	92	5	1.2195
Runx1	5	1	1	1	18343	0	0.77818	1.0628e-06	4.0344e-06	0.000782	93	5	0.77818
Tmem127	5	1	1	1	18342	0	1.2885	1.1771e-06	4.0344e-06	0.000782	94	5	1.2885
Med18	5	0.99999	0.99999	1	18316	0	1.2029	1.2256e-06	4.0344e-06	0.000782	95	5	1.2029
Ist1	5	1	1	1	18341	0	0.91545	1.3393e-06	4.5723e-06	0.000877	96	5	0.91545
Nfkbia	5	0.92604	0.92634	1	15959	0	1.3533	1.5516e-06	6.1861e-06	0.00115	97	3	1.3533
Kat6a	5	1	1	1	18340	0	0.96778	1.5678e-06	6.1861e-06	0.00115	98	5	0.96778
Chic2	5	0.83563	0.84146	1	14056	1	1.5911	1.6955e-06	6.1861e-06	0.00115	99	4	1.5911
Dicer1	5	1	1	1	18339	0	0.7512	1.9951e-06	6.724e-06	0.001238	100	5	0.7512
Ralgapb	5	0.99516	0.99514	1	17886	0	0.90366	2.094e-06	7.2619e-06	0.001285	101	5	0.90366
Atp6ap1	5	1	1	1	18338	0	0.88429	2.1278e-06	7.2619e-06	0.001285	102	5	0.88429
Ccdc115	5	1	1	1	18337	0	0.95106	2.1719e-06	7.2619e-06	0.001285	103	5	0.95106
Med13	5	1	1	1	18336	0	1.1372	2.2812e-06	7.2619e-06	0.001285	104	5	1.1372
Copg1	5	1	1	1	18335	0	1.3455	2.4577e-06	1.1027e-05	0.001933	105	5	1.3455
Dut	5	0.99918	0.99918	1	18148	0	2.123	2.8441e-06	1.2103e-05	0.002102	106	5	2.123
Dolpp1	5	0.99971	0.9997	1	18212	0	1.634	2.9499e-06	1.3179e-05	0.002267	107	5	1.634
Ptpn12	5	0.95093	0.95118	1	16575	0	1.267	3.1153e-06	1.3717e-05	0.002316	108	4	1.267
Slc35a1	5	0.99559	0.99559	1	17909	0	1.8381	3.1769e-06	1.3717e-05	0.002316	109	5	1.8381
Smarcb1	5	0.99987	0.99987	1	18242	0	1.8559	3.3505e-06	1.4255e-05	0.002343	110	5	1.8559
Fryl	5	0.99999	0.99999	1	18317	0	1.0123	3.5036e-06	1.4255e-05	0.002343	111	5	1.0123
Rnf19b	5	0.99996	0.99996	1	18284	0	0.81115	3.5089e-06	1.4255e-05	0.002343	112	5	0.81115
Asna1	5	0.95614	0.9564	1	16703	0	1.959	3.751e-06	1.6407e-05	0.002672	113	3	1.959
Rnf19a	5	1	0.99999	1	18333	0	1.0088	3.8213e-06	1.6945e-05	0.002736	114	5	1.0088
Bcl9l	5	1	0.99999	1	18332	0	0.6676	4.3335e-06	1.8558e-05	0.00297	115	5	0.6676
4933426M11Rik	5	0.99957	0.99956	1	18195	0	0.84774	4.4602e-06	1.9096e-05	0.002979	116	5	0.84774
Frs2	5	0.99999	0.99999	1	18322	0	1.4237	4.5677e-06	1.9096e-05	0.002979	117	5	1.4237
B4galnt1	5	1	0.99999	1	18331	0	0.62855	4.6896e-06	1.9096e-05	0.002979	118	5	0.62855
Sh2b3	5	0.91021	0.91059	1	15596	0	0.82907	4.7154e-06	1.9634e-05	0.003037	119	4	0.82907
Hdlbp	5	1	0.99999	1	18329	0	1.118	4.8316e-06	2.0172e-05	0.003094	120	5	1.118
Maz	5	0.99999	0.99999	1	18328	0	0.74102	5.0802e-06	2.1248e-05	0.003232	121	5	0.74102
Dpm2	5	0.99999	0.99999	1	18327	0	0.65625	5.5102e-06	2.4475e-05	0.003693	122	5	0.65625
Dgcr8	5	0.99871	0.9987	1	18111	0	1.1126	6.4057e-06	2.8779e-05	0.004307	123	5	1.1126
Pagr1a	5	0.99992	0.99993	1	18267	0	0.97511	6.4742e-06	2.9317e-05	0.004352	124	5	0.97511
Tceb1	5	0.99999	0.99999	1	18325	0	1.878	6.7137e-06	3.0393e-05	0.00444	125	5	1.878
Rbbp4	5	0.99997	0.99997	1	18298	0	1.832	6.9125e-06	3.1468e-05	0.004561	126	5	1.832
Hnrnpc	5	0.99999	0.99999	1	18324	0	1.2676	6.9904e-06	3.2006e-05	0.004567	127	5	1.2676
Med27	5	0.85759	0.85935	1	14485	1	1.5822	7.3908e-06	3.4696e-05	0.004912	128	4	1.5822
Sos1	5	0.92895	0.92927	1	16034	0	1.7542	7.919e-06	3.7386e-05	0.005213	129	4	1.7542
Ube2a	5	0.85263	0.85512	1	14360	1	0.78152	7.997e-06	3.7386e-05	0.005213	130	4	0.78152
Ptpn2	4	0.99997	0.99997	1	18296	0	1.4312	8.1668e-06	3.2006e-05	0.004567	131	4	1.4312
Bend3	5	0.99999	0.99999	1	18323	0	0.59531	8.1757e-06	3.7923e-05	0.005248	132	5	0.59531
Ppp1r8	5	0.65378	0.7386	1	11906	1	1.342	9.0182e-06	4.0613e-05	0.005579	133	4	1.342
Xpo5	5	0.99999	0.99999	1	18321	0	0.89624	9.1882e-06	4.1151e-05	0.005611	134	5	0.89624
Pa2g4	5	0.99992	0.99992	1	18265	0	1.7014	1.0099e-05	4.4916e-05	0.006079	135	5	1.7014
Ell	5	0.99999	0.99999	1	18318	0	0.84335	1.0518e-05	4.7606e-05	0.006396	136	5	0.84335
Copz1	5	0.99965	0.99965	1	18205	0	1.1434	1.1707e-05	5.0296e-05	0.00666	137	5	1.1434
Ap3d1	5	0.9518	0.95203	1	16600	0	0.99122	1.176e-05	5.0296e-05	0.00666	138	4	0.99122
Piga	5	0.99626	0.99622	1	17937	0	1.1187	1.1879e-05	5.0834e-05	0.006683	139	5	1.1187
St3gal2	5	0.99991	0.99991	1	18259	0	0.95888	1.2255e-05	5.1372e-05	0.006706	140	5	0.95888
Wdr1	5	0.99985	0.99986	1	18238	0	0.94247	1.267e-05	5.2447e-05	0.006798	141	5	0.94247
Prr12	5	0.99995	0.99996	1	18281	0	0.77356	1.2966e-05	5.4061e-05	0.006958	142	5	0.77356
Zc3h4	5	0.99997	0.99997	1	18293	0	1.1805	1.3038e-05	5.4599e-05	0.006979	143	5	1.1805
Romo1	5	0.99999	0.99999	1	18315	0	1.1742	1.3617e-05	5.6213e-05	0.007038	144	5	1.1742
Eif3d	5	0.99999	0.99999	1	18314	0	1.4142	1.3692e-05	5.6213e-05	0.007038	145	5	1.4142
Ccnt1	5	0.98659	0.98666	1	17544	0	1.1702	1.3797e-05	5.6213e-05	0.007038	146	4	1.1702
Timm13	5	0.99999	0.99999	1	18313	0	1.0015	1.3906e-05	5.7827e-05	0.007143	147	5	1.0015
Kdelr2	5	0.99999	0.99999	1	18312	0	0.94001	1.3942e-05	5.7827e-05	0.007143	148	5	0.94001
Hsp90b1	5	0.99998	0.99999	1	18310	0	1.1315	1.518e-05	6.2668e-05	0.00769	149	5	1.1315
Vps35	5	0.99998	0.99999	1	18309	0	0.98633	1.5305e-05	6.3744e-05	0.00777	150	5	0.98633
Mon2	5	0.93591	0.93618	1	16195	0	0.74321	1.7159e-05	7.504e-05	0.009087	151	4	0.74321
Dnm2	5	0.95122	0.95147	1	16583	0	1.1687	1.764e-05	7.7192e-05	0.009286	152	4	1.1687
Eif1	2	0.99998	0.99998	1	18308	0	1.731	1.7808e-05	3.0393e-05	0.00444	153	2	1.731
Chaf1a	5	0.99998	0.99998	1	18305	0	0.69418	1.874e-05	8.2033e-05	0.009805	154	5	0.69418
Asf1b	5	0.99998	0.99998	1	18304	0	0.74369	1.9107e-05	8.3109e-05	0.009869	155	5	0.74369
Btg1	5	0.99998	0.99998	1	18303	0	1.6141	1.9696e-05	8.5261e-05	0.01006	156	5	1.6141
Mapkapk2	5	0.99934	0.99933	1	18166	0	1.166	2.0169e-05	8.7412e-05	0.010248	157	5	1.166
Cd209f	5	0.99648	0.99646	1	17957	0	0.94846	2.0864e-05	8.9564e-05	0.010434	158	5	0.94846
Med14	5	0.99971	0.99971	1	18214	0	1.2046	2.1409e-05	9.3867e-05	0.010866	159	5	1.2046
Dusp12	5	0.99998	0.99998	1	18302	0	0.63835	2.1998e-05	9.6019e-05	0.011046	160	5	0.63835
Faf2	5	0.98392	0.98403	1	17457	0	0.89616	2.2609e-05	0.0001014	0.011592	161	4	0.89616
Pdia6	5	0.97129	0.97141	1	17090	0	1.164	2.2756e-05	0.00010301	0.011704	162	4	1.164
Slc33a1	5	0.99998	0.99998	1	18301	0	0.66487	2.2878e-05	0.00010463	0.011814	163	5	0.66487
Nfkb2	5	0.99998	0.99998	1	18300	0	0.62368	2.3431e-05	0.00010839	0.012165	164	5	0.62368
Pdap1	5	0.99998	0.99998	1	18299	0	1.2049	2.4545e-05	0.00011538	0.012836	165	5	1.2049
Pigp	9	0.8892	0.93952	1	15132	1	0.67913	2.4773e-05	0.000188	0.018273	166	6	0.67913
Usp8	5	0.92058	0.92092	1	15848	0	1.3209	2.4941e-05	0.00011807	0.012918	167	4	1.3209
Tceb3	5	0.99655	0.99653	1	17965	0	1.27	2.5307e-05	0.00011861	0.012918	168	5	1.27
Atxn7l1	10	0.99838	0.99839	1	18080	0	0.59773	2.6314e-05	0.00022673	0.021077	169	8	0.59773
Hnrnpab	5	0.99997	0.99997	1	18297	0	0.61028	2.8221e-05	0.00013045	0.014123	170	5	0.61028
Gan	5	0.27334	0.452	1	7067	1	0.67396	2.9991e-05	0.00014067	0.015141	171	4	0.67396
Alg3	5	0.93982	0.94005	1	16282	0	0.82128	3.0714e-05	0.00014336	0.015341	172	4	0.82128
Stag2	4	0.99839	0.99837	1	18083	0	1.9509	3.0955e-05	0.00011646	0.012836	173	4	1.9509
Kdm5c	5	0.99997	0.99997	1	18295	0	0.82294	3.0976e-05	0.00014605	0.015506	174	5	0.82294
N4bp1	5	0.80606	0.8199	1	13565	1	1.0208	3.1203e-05	0.00014658	0.015506	175	4	1.0208
Man2a1	4	0.99991	0.99991	1	18262	0	1.0662	3.1224e-05	0.00011646	0.012836	176	4	1.0662
Snx17	5	0.99997	0.99997	1	18294	0	0.76724	3.199e-05	0.00015196	0.015983	177	5	0.76724
Sox4	5	0.98975	0.98983	1	17667	0	0.9432	3.2896e-05	0.00015627	0.016342	178	4	0.9432
Vmn2r27	5	0.82585	0.83403	1	13875	1	-0.13208	3.3283e-05	0.00015788	0.016418	179	2	-0.13208
Pigo	5	0.95125	0.95149	1	16584	0	0.74724	3.4056e-05	0.00016057	0.016511	180	4	0.74724
Cnot3	5	0.99356	0.99359	1	17816	0	0.9891	3.4154e-05	0.00016057	0.016511	181	4	0.9891
Pigm	5	0.99997	0.99997	1	18292	0	1.0108	3.4631e-05	0.00016218	0.016547	182	5	1.0108
Atp6v0d1	5	0.99764	0.99762	1	18030	0	1.6865	3.4681e-05	0.00016272	0.016547	183	5	1.6865
Slc12a9	5	0.99993	0.99994	1	18275	0	1.1236	3.5213e-05	0.00016434	0.01662	184	5	1.1236
Lsm14a	5	0.99989	0.9999	1	18251	0	1.1754	3.7458e-05	0.00017832	0.017935	185	5	1.1754
Sertad2	5	0.95006	0.9503	1	16547	0	0.69389	3.7694e-05	0.00018155	0.018019	186	4	0.69389
Dpm3	5	0.99996	0.99996	1	18290	0	0.64922	3.7709e-05	0.00018155	0.018019	187	5	0.64922
Copa	5	0.99996	0.99996	1	18289	0	1.2717	3.7903e-05	0.00018209	0.018019	188	5	1.2717
Traf2	5	0.9124	0.91275	1	15641	0	1.0526	3.8197e-05	0.00018316	0.018028	189	4	1.0526
Rad21	5	0.38535	0.54646	1	8532	1	1.0163	3.8968e-05	0.00018693	0.018273	190	4	1.0163
Prkce	5	0.99978	0.99979	1	18224	0	0.90263	3.9259e-05	0.00018908	0.018273	191	5	0.90263
Brd7	5	0.99996	0.99996	1	18288	0	0.94284	3.9622e-05	0.00018962	0.018273	192	5	0.94284
Dcaf15	5	0.99996	0.99996	1	18287	0	0.88969	4.0968e-05	0.00019822	0.018956	193	5	0.88969
Stt3a	5	0.99996	0.99996	1	18286	0	0.64144	4.1288e-05	0.00019876	0.018956	194	5	0.64144
Cnot7	5	0.99996	0.99996	1	18285	0	0.70392	4.1777e-05	0.00020091	0.019062	195	5	0.70392
Gdi2	5	0.99996	0.99996	1	18283	0	1.1914	4.3716e-05	0.00020844	0.019675	196	5	1.1914
Emc4	5	0.9999	0.99991	1	18253	0	0.97218	4.5194e-05	0.00021544	0.020231	197	5	0.97218
Gmip	5	0.99995	0.99996	1	18282	0	0.64729	4.7341e-05	0.00022512	0.021033	198	5	0.64729
Zhx1	5	0.99995	0.99995	1	18280	0	0.76142	4.8171e-05	0.00022942	0.02122	199	5	0.76142
Grb2	5	0.68337	0.75178	1	12161	1	2.074	4.9183e-05	0.00023373	0.02151	200	4	2.074
Ext1	5	0.99341	0.99344	1	17810	0	0.85842	5.0724e-05	0.00024099	0.021913	201	4	0.85842
Orc5	5	0.99995	0.99995	1	18279	0	1.13	5.0874e-05	0.00024287	0.021913	202	5	1.13
Cebpb	5	0.99991	0.99992	1	18264	0	0.7484	5.0979e-05	0.00024287	0.021913	203	5	0.7484
Eif3j1	5	0.94754	0.94779	1	16479	0	0.9169	5.1097e-05	0.00024287	0.021913	204	4	0.9169
Dpm1	5	0.99994	0.99995	1	18278	0	0.96059	5.5424e-05	0.00026331	0.023642	205	5	0.96059
Zc3h18	5	0.96123	0.96142	1	16828	0	1.2157	5.7417e-05	0.00026762	0.023796	206	4	1.2157
Cnot4	5	0.9887	0.98876	1	17625	0	0.96919	5.7448e-05	0.00026762	0.023796	207	4	0.96919
Top3a	5	0.99994	0.99994	1	18277	0	1.3751	6.2707e-05	0.00028806	0.02549	208	5	1.3751
Chmp2b	5	0.99901	0.99901	1	18138	0	0.9887	6.3808e-05	0.00029236	0.025747	209	5	0.9887
Vps33a	5	0.88149	0.88197	1	14966	0	1.1189	6.4838e-05	0.00029882	0.02619	210	4	1.1189
Rnaseh2a	5	0.99993	0.99994	1	18276	0	0.91036	6.6333e-05	0.00030419	0.026504	211	5	0.91036
Ubr4	5	0.99993	0.99994	1	18274	0	1.0072	6.6663e-05	0.00030527	0.026504	212	5	1.0072
Osgin1	5	0.99993	0.99994	1	18273	0	0.49113	6.8181e-05	0.00031226	0.026984	213	5	0.49113
Lsm11	5	0.99993	0.99994	1	18272	0	0.94255	6.8846e-05	0.00031495	0.027009	214	5	0.94255
Kcmf1	5	0.99985	0.99986	1	18236	0	1.2015	6.8985e-05	0.00031549	0.027009	215	5	1.2015
Sec62	5	0.51134	0.65642	1	10386	1	1.1778	7.164e-05	0.00032679	0.027847	216	4	1.1778
Arcn1	5	0.99992	0.99993	1	18269	0	1.3826	7.5513e-05	0.00034185	0.02869	217	5	1.3826
Dpep2	5	0.99992	0.99993	1	18268	0	0.56013	7.5569e-05	0.00034239	0.02869	218	5	0.56013
Bmpr1a	5	0.99951	0.99949	1	18188	0	1.2221	7.5621e-05	0.00034239	0.02869	219	5	1.2221
Mta2	5	0.99992	0.99993	1	18266	0	0.41961	7.6248e-05	0.00034454	0.028695	220	5	0.41961
Smg7	5	0.99972	0.99971	1	18215	0	1.2999	7.8312e-05	0.00035637	0.029547	221	5	1.2999
Taok1	5	0.99982	0.99983	1	18233	0	1.1152	7.9484e-05	0.00035906	0.029636	222	5	1.1152
Cblb	5	0.45422	0.60608	1	9539	1	1.0278	8.4833e-05	0.00038703	0.031803	223	4	1.0278
Map1s	5	0.99991	0.99991	1	18263	0	0.58446	8.7157e-05	0.00039726	0.032497	224	5	0.58446
Bcr	5	0.99991	0.99991	1	18261	0	0.55485	8.87e-05	0.00040102	0.032603	225	5	0.55485
Dnajb11	5	0.99905	0.99904	1	18141	0	0.94559	8.8997e-05	0.0004021	0.032603	226	5	0.94559
Atp2b1	4	0.99991	0.99991	1	18260	0	0.68915	9.0201e-05	0.00034293	0.02869	227	4	0.68915
Tbk1	5	0.99991	0.99991	1	18258	0	0.77229	9.0949e-05	0.00041286	0.033125	228	5	0.77229
Epn1	5	0.97232	0.97243	1	17120	0	0.98052	9.0985e-05	0.00041339	0.033125	229	4	0.98052
Med19	5	0.99991	0.99991	1	18257	0	0.90088	9.1473e-05	0.00041393	0.033125	230	5	0.90088
Med10	5	0.99944	0.99942	1	18179	0	1.3272	9.3876e-05	0.00042577	0.033925	231	5	1.3272
Gse1	5	0.9999	0.99991	1	18254	0	0.50718	9.5465e-05	0.00043545	0.034547	232	5	0.50718
Ankrd11	5	0.99475	0.99474	1	17866	0	0.77236	9.6292e-05	0.0004376	0.034568	233	5	0.77236
Ier2	5	0.99979	0.99979	1	18226	0	0.77852	9.7275e-05	0.00044083	0.034675	234	5	0.77852
Emp1	5	0.99885	0.99885	1	18124	0	0.85261	9.8716e-05	0.00044997	0.035243	235	5	0.85261
Smg9	5	0.99989	0.9999	1	18252	0	0.75013	0.0001055	0.00047902	0.037359	236	5	0.75013
Wdr82	5	0.99872	0.99872	1	18114	0	1.2723	0.00010716	0.00048709	0.037828	237	5	1.2723
Med11	5	0.99495	0.99495	1	17878	0	2.1595	0.0001094	0.00049462	0.037988	238	5	2.1595
Ddx17	5	0.99989	0.99989	1	18250	0	1.0086	0.00010974	0.00049623	0.037988	239	5	1.0086
Sorbs2	5	0.99989	0.99989	1	18249	0	0.49281	0.0001098	0.00049623	0.037988	240	5	0.49281
Unc50	5	0.99572	0.99571	1	17916	0	0.80252	0.0001106	0.00049892	0.037988	241	5	0.80252
Syvn1	5	0.99989	0.99989	1	18248	0	1.1144	0.00011079	0.00049946	0.037988	242	5	1.1144
Rabif	5	0.99947	0.99945	1	18182	0	0.71171	0.00011212	0.00050484	0.038008	243	5	0.71171
Pofut1	5	0.97234	0.97246	1	17122	0	0.78761	0.00011226	0.00050484	0.038008	244	4	0.78761
Gnl3l	5	0.99989	0.99989	1	18247	0	0.73742	0.00011268	0.00050592	0.038008	245	5	0.73742
Raf1	5	0.99948	0.99946	1	18183	0	0.9454	0.00011316	0.00050914	0.038095	246	5	0.9454
Hdac8	5	0.99989	0.99989	1	18246	0	0.93082	0.00011485	0.00051614	0.038462	247	5	0.93082
Trappc5	5	0.99988	0.99989	1	18245	0	1.1686	0.00011548	0.00052098	0.038666	248	5	1.1686
Mesdc1	5	0.99758	0.99755	1	18024	0	0.77726	0.00011741	0.00052851	0.039067	249	5	0.77726
B4galt5	5	0.99988	0.99988	1	18243	0	0.49785	0.00012016	0.00053819	0.039624	250	5	0.49785
Prc1	5	0.28578	0.4623	1	7224	1	1.8962	0.00012188	0.00054411	0.039859	251	4	1.8962
Atxn7l3	5	0.99336	0.99338	1	17806	0	1.0834	0.00012273	0.00054572	0.039859	252	4	1.0834
Acaca	5	0.99724	0.99724	1	18006	0	1.2863	0.00012689	0.00057262	0.041659	253	5	1.2863
Nfat5	5	0.99846	0.99846	1	18086	0	1.0103	0.00013313	0.00060382	0.043755	254	5	1.0103
Cd3eap	5	0.99987	0.99987	1	18240	0	0.76491	0.00013359	0.0006092	0.043784	255	5	0.76491
Smg8	5	0.99651	0.99648	1	17960	0	0.70715	0.00013387	0.00061081	0.043784	256	5	0.70715
Eftud1	5	0.99987	0.99987	1	18239	0	0.68005	0.00013393	0.00061135	0.043784	257	5	0.68005
Pigv	10	0.42687	0.68707	1	9145	2	0.44552	0.0001367	0.0010212	0.063503	258	7	0.44552
Acvr1	5	0.93771	0.93795	1	16226	0	0.83392	0.00013844	0.00063071	0.044822	259	4	0.83392
Eed	5	0.99352	0.99354	1	17814	0	0.91625	0.00013863	0.00063071	0.044822	260	4	0.91625
Pole4	5	0.99827	0.99826	1	18072	0	0.95702	0.00014501	0.00065869	0.046451	261	5	0.95702
Nsmce4a	5	0.99936	0.99934	1	18168	0	0.84778	0.00014908	0.00068182	0.047754	262	5	0.84778
Snd1	5	0.99834	0.99833	1	18077	0	0.88095	0.00014925	0.00068235	0.047754	263	5	0.88095
P4hb	5	0.85433	0.85658	1	14404	1	1.0087	0.00015126	0.00069204	0.048216	264	3	1.0087
Cdkn2aip	5	0.99985	0.99986	1	18237	0	0.76212	0.00015176	0.00069419	0.048216	265	5	0.76212
Atg4d	5	0.99984	0.99986	1	18235	0	0.44917	0.00015544	0.00071839	0.04971	266	5	0.44917
Coprs	5	0.99984	0.99985	1	18234	0	0.50127	0.00015955	0.00074206	0.050964	267	5	0.50127
Uchl5	5	0.99755	0.99753	1	18021	0	0.8795	0.00015957	0.00074206	0.050964	268	5	0.8795
Med4	5	0.93808	0.93832	1	16238	0	1.0822	0.00016629	0.00077004	0.052689	269	4	1.0822
Mzt2	5	0.99357	0.99359	1	17818	0	0.9097	0.00016889	0.00078241	0.053337	270	4	0.9097
B4galt7	5	0.98768	0.98773	1	17586	0	1.0077	0.00017186	0.00079317	0.053746	271	4	1.0077
Thap7	5	0.28043	0.45787	1	7142	1	0.68022	0.00017215	0.00079424	0.053746	272	4	0.68022
Slc35a3	5	0.99816	0.99815	1	18067	0	1.2045	0.00017258	0.00079801	0.053751	273	5	1.2045
Paxip1	5	0.83309	0.8395	1	14012	1	0.70337	0.00017287	0.00080016	0.053751	274	4	0.70337
Josd2	5	0.99871	0.99871	1	18112	0	0.91598	0.00017538	0.0008163	0.054635	275	5	0.91598
Adad2	5	0.99982	0.99983	1	18232	0	0.46144	0.00017811	0.00082652	0.055119	276	5	0.46144
Dnm1l	5	0.99982	0.99982	1	18231	0	1.1125	0.0001809	0.00083674	0.055599	277	5	1.1125
Dctn1	5	0.99982	0.99982	1	18230	0	0.73691	0.00018278	0.00084481	0.055933	278	5	0.73691
Taf13	5	0.99932	0.9993	1	18162	0	0.91949	0.00018348	0.00084803	0.055946	279	5	0.91949
Rraga	5	0.99982	0.99982	1	18229	0	1.0594	0.00018421	0.00085288	0.056064	280	5	1.0594
Vgll4	5	0.99946	0.99944	1	18181	0	0.82188	0.00018473	0.0008561	0.056076	281	5	0.82188
Polr2c	5	0.52016	0.66429	1	10532	2	1.0724	0.00019619	0.00090075	0.058412	282	3	1.0724
Rbm14	5	0.88208	0.88255	1	14977	0	1.2446	0.00019636	0.00090129	0.058412	283	4	1.2446
Prkd3	5	0.9998	0.9998	1	18228	0	0.59552	0.0001994	0.0009142	0.058904	284	5	0.59552
Jund	5	0.9998	0.9998	1	18227	0	0.60122	0.00019977	0.00091527	0.058904	285	5	0.60122
Pan2	5	0.82649	0.83451	1	13889	1	0.79815	0.00020342	0.00093141	0.059734	286	4	0.79815
Pigu	5	0.64124	0.73333	1	11809	1	1.1733	0.0002126	0.00097337	0.061984	287	4	1.1733
Brd8	5	0.99979	0.99979	1	18225	0	0.91453	0.00021331	0.0009766	0.061984	288	5	0.91453
Atp2c1	5	0.84947	0.85247	1	14298	1	0.90183	0.00021761	0.00099596	0.06279	289	4	0.90183
Atp13a1	5	0.99919	0.99919	1	18149	0	0.74143	0.00021787	0.00099704	0.06279	290	5	0.74143
Pbrm1	5	0.15507	0.30863	1	4945	1	1.2135	0.00021863	0.0010003	0.06279	291	4	1.2135
Nip7	5	0.99971	0.99971	1	18213	0	1.0721	0.00021938	0.001003	0.06279	292	5	1.0721
Ccdc120	5	0.99649	0.99646	1	17958	0	0.76829	0.00022793	0.0010401	0.064456	293	5	0.76829
Ppp1cb	5	0.99977	0.99977	1	18223	0	1.0711	0.00023336	0.0010632	0.065669	294	5	1.0711
Mafk	5	0.92434	0.92469	1	15925	0	0.92036	0.00023694	0.0010756	0.066099	295	4	0.92036
Arntl	5	0.99901	0.99901	1	18137	0	0.69591	0.00023748	0.0010804	0.066099	296	5	0.69591
Azi2	4	0.18002	0.31498	1	5461	1	0.86988	0.0002386	0.00087493	0.057106	297	3	0.86988
Spns1	5	0.99921	0.99921	1	18152	0	0.84498	0.00023878	0.0010863	0.066099	298	5	0.84498
Stk38l	5	0.99976	0.99976	1	18222	0	0.46574	0.0002389	0.0010869	0.066099	299	5	0.46574
Zfhx3	5	0.99929	0.99927	1	18157	0	0.72794	0.00023971	0.0010906	0.066099	300	5	0.72794
Cyb5r3	5	0.85213	0.85471	1	14346	1	0.67252	0.00024009	0.0010917	0.066099	301	4	0.67252
Rabgap1	5	0.98417	0.98427	1	17468	0	0.60604	0.0002429	0.0011073	0.066824	302	4	0.60604
Rpl4	5	0.8023	0.81734	1	13511	1	1.7361	0.00024482	0.001117	0.067183	303	4	1.7361
Ccdc137	5	0.99975	0.99975	1	18221	0	1.2198	0.00024715	0.0011288	0.067183	304	5	1.2198
Alg9	5	0.99975	0.99975	1	18220	0	0.77155	0.00024832	0.001131	0.067183	305	5	0.77155
Rad51d	5	0.99312	0.99315	1	17796	0	0.62924	0.00024834	0.0011315	0.067183	306	4	0.62924
Smg6	5	0.99958	0.99957	1	18198	0	0.77116	0.00024834	0.0011315	0.067183	307	5	0.77116
Cmip	5	0.99975	0.99975	1	18219	0	0.62501	0.00025125	0.0011487	0.067986	308	5	0.62501
Rictor	5	0.76742	0.79544	1	13014	1	0.83731	0.00026088	0.0011934	0.070402	309	4	0.83731
Ccl25	4	0.85063	0.85061	1	14319	0	1.1121	0.00026441	0.00096799	0.061864	310	3	1.1121
Ncoa2	5	0.99973	0.99973	1	18218	0	0.58932	0.00026855	0.0012337	0.072549	311	5	0.58932
Arhgap21	5	0.99147	0.99156	1	17732	0	0.64839	0.00027347	0.0012531	0.073453	312	4	0.64839
Gadd45b	5	0.99972	0.99972	1	18217	0	0.57801	0.00027597	0.0012671	0.073789	313	5	0.57801
Fcho2	5	0.9995	0.99948	1	18187	0	0.85931	0.00027732	0.0012708	0.073789	314	5	0.85931
Sec61b	4	0.96716	0.96727	1	16984	0	1.117	0.00027962	0.0010202	0.063503	315	3	1.117
Med7	5	0.99972	0.99971	1	18216	0	1.6725	0.00027989	0.0012907	0.074709	316	5	1.6725
Psenen	5	0.99971	0.9997	1	18211	0	0.88232	0.0002926	0.0013531	0.078075	317	5	0.88232
Tef	5	0.99478	0.99478	1	17869	0	0.71763	0.0002963	0.0013677	0.078666	318	5	0.71763
Oat	5	0.99339	0.99342	1	17809	0	0.61064	0.00030212	0.0013967	0.079931	319	4	0.61064
Man1b1	5	0.58898	0.71265	1	11405	1	0.6932	0.00030241	0.0013983	0.079931	320	4	0.6932
Spcs1	5	0.83968	0.84457	1	14124	1	0.19472	0.00030586	0.0014139	0.080572	321	3	0.19472
Tmem192	5	0.92089	0.92124	1	15854	0	0.63201	0.00030672	0.0014198	0.080659	322	4	0.63201
Gsr	5	0.99969	0.99968	1	18210	0	0.40804	0.00031292	0.0014451	0.081343	323	5	0.40804
Smad4	5	0.99969	0.99968	1	18209	0	0.75852	0.00031301	0.0014451	0.081343	324	5	0.75852
Vps33b	5	0.99967	0.99967	1	18208	0	0.77063	0.00032668	0.0014989	0.084113	325	5	0.77063
Rpl35	2	0.99967	0.99967	1	18207	0	1.4022	0.00032815	0.00064093	0.045373	326	2	1.4022
B3galt4	5	0.99705	0.99704	1	17996	0	0.56669	0.00032923	0.0015086	0.084399	327	5	0.56669
Eri1	5	0.93029	0.93059	1	16056	0	0.98155	0.00033081	0.0015134	0.084412	328	3	0.98155
Chaf1b	5	0.96816	0.96833	1	17012	0	1.2068	0.00033299	0.0015226	0.084412	329	3	1.2068
Lamb1	5	0.99966	0.99966	1	18206	0	0.34963	0.00034357	0.001578	0.087221	330	5	0.34963
Rad9a	4	0.78803	0.78954	1	13279	1	1.8795	0.00034779	0.001259	0.073566	331	3	1.8795
Vps4a	5	0.99964	0.99964	1	18204	0	0.4034	0.00035854	0.0016361	0.090161	332	5	0.4034
Zbtb45	5	0.98504	0.98516	1	17494	0	0.65689	0.00036052	0.001642	0.090217	333	4	0.65689
Smad1	5	0.99942	0.9994	1	18177	0	0.66845	0.00036296	0.0016538	0.090597	334	5	0.66845
4930567H17Rik	5	0.99871	0.9987	1	18110	0	0.6095	0.00036415	0.0016608	0.09071	335	5	0.6095
Tldc1	5	0.99963	0.99963	1	18203	0	0.38143	0.00036714	0.0016737	0.091145	336	5	0.38143
Cope	5	0.99963	0.99963	1	18202	0	0.61477	0.0003691	0.0016824	0.091343	337	5	0.61477
Slc7a5	5	0.98986	0.98993	1	17672	0	0.52707	0.00037528	0.0017055	0.092327	338	4	0.52707
Umps	5	0.95534	0.95559	1	16681	0	0.60309	0.00037797	0.0017184	0.092327	339	4	0.60309
Nkiras2	5	0.81302	0.82482	1	13672	1	0.81177	0.00037834	0.00172	0.092327	340	4	0.81177
Ppp1r11	5	0.99962	0.99962	1	18201	0	0.91276	0.00037856	0.0017205	0.092327	341	5	0.91276
Vps51	5	0.99961	0.99961	1	18200	0	0.62192	0.00038547	0.0017571	0.094016	342	5	0.62192
Gmeb2	5	0.97801	0.97815	1	17284	0	0.88868	0.00038717	0.0017641	0.094059	343	4	0.88868
Nfkbid	5	0.99847	0.99847	1	18087	0	0.82638	0.00039128	0.0017829	0.094573	344	5	0.82638
Slc7a15	4	0.86211	0.86214	1	14562	0	0.78033	0.00039448	0.0014328	0.081142	345	3	0.78033
Slc10a7	5	0.88076	0.88125	1	14940	0	0.84532	0.00040331	0.0018383	0.097232	346	4	0.84532
Ltn1	5	0.94867	0.94895	1	16513	0	0.70604	0.00040637	0.0018545	0.097804	347	4	0.70604
Ss18	5	0.98251	0.98261	1	17415	0	0.71753	0.00041082	0.0018808	0.098798	348	4	0.71753
Purg	5	0.99959	0.99958	1	18199	0	0.55414	0.00041141	0.0018841	0.098798	349	5	0.55414
Orc4	7	0.8692	0.89709	1	14698	1	1.1571	0.00041364	0.0024516	0.117205	350	6	1.1571
Batf	5	0.94503	0.94528	1	16413	0	0.69862	0.00041873	0.0019142	0.099921	351	4	0.69862
Ipo13	5	0.99958	0.99957	1	18197	0	0.51574	0.00041957	0.0019163	0.099921	352	5	0.51574
Sertad1	5	0.99957	0.99956	1	18196	0	0.61568	0.00042904	0.0019658	0.102212	353	5	0.61568
Ubn2	5	0.80877	0.8218	1	13606	1	0.78249	0.00043117	0.0019744	0.102278	354	4	0.78249
2310057M21Rik	5	0.99957	0.99956	1	18194	0	0.94218	0.00043164	0.0019782	0.102278	355	5	0.94218
Ajuba	5	0.99174	0.99181	1	17742	0	0.64219	0.00043572	0.0019949	0.102851	356	4	0.64219
Rab10	5	0.95266	0.95291	1	16621	0	1.425	0.00044074	0.0020234	0.10403	357	3	1.425
Acin1	5	0.8761	0.87663	1	14844	1	0.65711	0.00044312	0.0020358	0.104304	358	4	0.65711
Rnasek	5	0.99956	0.99954	1	18193	0	1.2204	0.00044435	0.0020401	0.104304	359	5	1.2204
Dnaaf3	5	0.99922	0.99921	1	18153	0	0.66969	0.00045276	0.0020788	0.105807	360	5	0.66969
Tex101	5	0.99955	0.99953	1	18192	0	0.50939	0.00045367	0.002081	0.105807	361	5	0.50939
Gtpbp3	5	0.81213	0.82419	1	13659	1	0.61373	0.00046786	0.0021412	0.10857	362	4	0.61373
Otud4	5	0.71026	0.76462	1	12422	1	0.76609	0.00047297	0.002167	0.109327	363	4	0.76609
Keap1	5	0.96802	0.96819	1	17006	0	0.62533	0.00047503	0.0021818	0.109327	364	4	0.62533
Mtss1	5	0.9994	0.99938	1	18176	0	0.72294	0.00047657	0.0021891	0.109327	365	5	0.72294
Spata2	5	0.99952	0.99951	1	18191	0	0.40597	0.00047683	0.0021891	0.109327	366	5	0.40597
Maged1	5	0.99952	0.99951	1	18190	0	0.56458	0.0004772	0.0021907	0.109327	367	5	0.56458
Ncstn	5	0.85407	0.85637	1	14397	1	0.66085	0.00047752	0.0021918	0.109327	368	3	0.66085
Ptplb	4	0.99711	0.99713	1	18002	0	1.1887	0.00048302	0.0017681	0.094059	369	4	1.1887
Hoxc6	5	0.99952	0.9995	1	18189	0	0.46571	0.00048357	0.0022187	0.109614	370	5	0.46571
Srsf6	5	0.99196	0.99201	1	17752	0	0.32398	0.00048364	0.0022192	0.109614	371	4	0.32398
Ube4b	5	0.99902	0.99901	1	18139	0	0.92208	0.00048437	0.0022208	0.109614	372	5	0.92208
Pign	5	0.9994	0.99937	1	18174	0	0.5228	0.00048478	0.0022213	0.109614	373	5	0.5228
Vps53	5	0.85744	0.85922	1	14480	1	0.81014	0.00049384	0.0022617	0.111307	374	4	0.81014
Pcnp	5	0.99949	0.99948	1	18186	0	0.63196	0.0005051	0.0023144	0.113597	375	5	0.63196
Mgea5	5	0.99949	0.99948	1	18185	0	0.59348	0.00050871	0.0023314	0.114045	376	5	0.59348
Ankrd10	5	0.99949	0.99948	1	18184	0	0.40645	0.00050949	0.0023359	0.114045	377	5	0.40645
Rbfox2	5	0.98236	0.98246	1	17411	0	0.66914	0.0005132	0.0023494	0.114109	378	4	0.66914
Flt3l	5	0.78243	0.80456	1	13204	1	0.68678	0.00051396	0.002351	0.114109	379	3	0.68678
Picalm	5	0.99554	0.99554	1	17906	0	0.86224	0.00051574	0.0023558	0.114109	380	5	0.86224
Ddx31	5	0.79238	0.81079	1	13344	1	0.66257	0.00052202	0.0023822	0.115083	381	3	0.66257
Slc26a4	5	0.94324	0.94349	1	16362	0	0.46966	0.00052486	0.002394	0.115352	382	4	0.46966
Abcg3	5	0.98399	0.98409	1	17459	0	0.85953	0.00052841	0.0024096	0.1158	383	4	0.85953
Arfrp1	5	0.9992	0.9992	1	18151	0	0.85488	0.00052975	0.0024172	0.11586	384	5	0.85488
Ap5z1	5	0.99946	0.99944	1	18180	0	0.34701	0.0005414	0.0024704	0.117799	385	5	0.34701
Vpreb1	5	0.98813	0.98817	1	17607	0	0.55209	0.00055462	0.002522	0.119641	386	4	0.55209
Arfgef2	5	0.22593	0.41121	1	6439	1	0.58369	0.00055841	0.0025398	0.120174	387	4	0.58369
Fnip1	5	0.99943	0.99941	1	18178	0	0.64163	0.00056651	0.0025748	0.121516	388	5	0.64163
Sprn	5	0.99872	0.99871	1	18113	0	0.59041	0.000576	0.0026183	0.123256	389	5	0.59041
Pam16	5	0.99775	0.99773	1	18040	0	1.1622	0.00058372	0.0026511	0.124482	390	5	1.1622
Heatr3	5	0.69399	0.75671	1	12262	1	0.65163	0.00058834	0.00267	0.125047	391	3	0.65163
Nlrp2	5	0.9994	0.99938	1	18175	0	0.49287	0.00059613	0.0027023	0.126238	392	5	0.49287
Snap29	5	0.99939	0.99936	1	18173	0	0.64164	0.00061016	0.0027646	0.128675	393	5	0.64164
Nsf	5	0.52985	0.67302	1	10682	1	1.3796	0.00061077	0.0027684	0.128675	394	3	1.3796
Sugp2	5	0.99938	0.99936	1	18172	0	0.44324	0.00061974	0.0028034	0.129441	395	5	0.44324
Foxa1	5	0.99938	0.99936	1	18171	0	0.61445	0.00062209	0.0028163	0.129441	396	5	0.61445
Dnajb9	5	0.97867	0.9788	1	17301	0	0.7687	0.00062259	0.0028179	0.129441	397	4	0.7687
Scfd1	5	0.99251	0.99257	1	17766	0	0.96029	0.00062302	0.0028195	0.129441	398	4	0.96029
Pigb	5	0.99938	0.99935	1	18170	0	0.8132	0.00062308	0.0028201	0.129441	399	5	0.8132
Sept12	5	0.97157	0.97169	1	17100	0	0.76777	0.00063248	0.0028685	0.131336	400	4	0.76777
Chchd4	5	0.99936	0.99934	1	18169	0	0.81181	0.00063583	0.0028819	0.131624	401	5	0.81181
Fntb	5	0.99935	0.99934	1	18167	0	0.70035	0.0006451	0.0029255	0.133284	402	5	0.70035
Micalcl	5	0.99933	0.99932	1	18165	0	0.6434	0.00066718	0.0030282	0.137624	403	5	0.6434
Gp9	5	0.99933	0.99932	1	18164	0	0.49991	0.00067186	0.0030492	0.138139	404	5	0.49991
Slmo2	5	0.73335	0.77632	1	12645	1	2.107	0.00067286	0.0030546	0.138139	405	4	2.107
Uba2	4	0.80121	0.80171	1	13497	1	1.2345	0.0006819	0.0024828	0.118083	406	3	1.2345
Rassf7	5	0.99932	0.9993	1	18163	0	0.53758	0.00068278	0.0030933	0.139548	407	5	0.53758
Hectd1	5	0.99523	0.99521	1	17890	0	1.0629	0.00068663	0.0031095	0.139933	408	5	1.0629
Fam228b	5	0.99931	0.99929	1	18161	0	0.41109	0.0006916	0.0031256	0.14016	409	5	0.41109
Cpsf2	5	0.99881	0.9988	1	18121	0	0.91424	0.0006957	0.0031444	0.14016	410	5	0.91424
Ptar1	5	0.9993	0.99928	1	18160	0	0.57778	0.00069583	0.003145	0.14016	411	5	0.57778
Asf1a	5	0.9993	0.99928	1	18159	0	0.51966	0.00070059	0.0031665	0.140778	412	5	0.51966
Nfkbib	5	0.39574	0.55544	1	8676	2	0.48862	0.00070681	0.0031923	0.141244	413	3	0.48862
Myc	5	0.99929	0.99927	1	18158	0	0.9925	0.00071154	0.0032095	0.141326	414	5	0.9925
Tmc7	5	0.99922	0.99921	1	18155	0	0.60359	0.00071329	0.0032176	0.141343	415	5	0.60359
Klf16	5	0.99928	0.99926	1	18156	0	0.43477	0.00072296	0.0032606	0.142893	416	5	0.43477
Vps41	5	0.99802	0.998	1	18059	0	1.2618	0.00073469	0.0033182	0.145069	417	5	1.2618
Med30	5	0.99911	0.99911	1	18144	0	0.80552	0.00074005	0.0033429	0.145805	418	5	0.80552
Ugcg	5	0.99594	0.99593	1	17922	0	1.0073	0.0007443	0.0033596	0.146186	419	5	1.0073
Ercc1	5	0.99303	0.99306	1	17793	0	0.70223	0.00075489	0.0034026	0.147595	420	4	0.70223
Pik3cg	5	0.79582	0.81303	1	13395	1	0.47939	0.00075649	0.003408	0.147595	421	4	0.47939
Nasp	5	0.99789	0.99787	1	18048	0	1.1738	0.00077391	0.0034844	0.150196	422	5	1.1738
Pold1	5	0.95494	0.9552	1	16671	0	1.2381	0.00077391	0.0034844	0.150196	423	3	1.2381
Zfp574	5	0.99868	0.99867	1	18108	0	0.76242	0.00077716	0.0035016	0.150585	424	5	0.76242
Rpl28	2	0.99922	0.99922	1	18154	0	1.0349	0.00078319	0.0015183	0.084412	425	2	1.0349
Eif4e2	5	0.67626	0.74849	1	12099	1	0.88354	0.00080173	0.0036113	0.153956	426	4	0.88354
Nudt10	5	0.9992	0.9992	1	18150	0	0.44658	0.00080498	0.0036275	0.153956	427	5	0.44658
Srrm2	5	0.88609	0.88657	1	15064	0	0.41533	0.00080553	0.0036296	0.153956	428	4	0.41533
Chrac1	5	0.96199	0.96218	1	16857	0	0.54809	0.00080979	0.0036495	0.154421	429	4	0.54809
Atp6v1c1	5	0.925	0.92536	1	15938	0	0.82668	0.00081538	0.0036678	0.154839	430	3	0.82668
Calcoco1	5	0.96725	0.96743	1	16988	0	0.69362	0.00082393	0.0037049	0.156048	431	4	0.69362
Ext2	5	0.82985	0.83701	1	13957	1	0.68401	0.00082901	0.0037286	0.156222	432	4	0.68401
Ppp1r18	5	0.88641	0.8869	1	15073	0	0.6975	0.00083013	0.0037345	0.156222	433	4	0.6975
2810474O19Rik	5	0.68466	0.75238	1	12177	1	0.78311	0.00083236	0.0037447	0.156294	434	4	0.78311
Kcnj11	5	0.99916	0.99916	1	18147	0	0.4225	0.00083671	0.0037663	0.156837	435	5	0.4225
Hras1	5	0.99658	0.99655	1	17968	0	0.66818	0.00085115	0.0038233	0.158852	436	5	0.66818
Dbf4	5	0.99006	0.99012	1	17684	0	0.87373	0.00086138	0.0038642	0.160189	437	4	0.87373
Samt4	5	0.37982	0.54171	1	8449	2	-0.018511	0.00086604	0.0038808	0.160518	438	2	-0.018511
Cdk6	4	0.98813	0.98816	1	17605	0	0.77579	0.00086902	0.0031342	0.14016	439	4	0.77579
Akt1s1	5	0.86114	0.86251	1	14545	1	0.62768	0.00087771	0.0039293	0.162156	440	4	0.62768
Actb	4	0.12027	0.25049	1	4156	2	0.94118	0.00088038	0.0031842	0.141226	441	2	0.94118
Pigk	4	0.99911	0.9991	1	18145	0	0.75728	0.0008872	0.0032068	0.141326	442	4	0.75728
Ddi2	5	0.98886	0.98893	1	17632	0	0.63957	0.00089233	0.0039868	0.164164	443	4	0.63957
Ncoa7	10	0.40817	0.66971	1	8863	3	0.21502	0.00089552	0.0057178	0.208815	444	5	0.21502
Supt5	5	0.99452	0.99453	1	17860	0	1.0431	0.00089937	0.0040228	0.164903	445	5	1.0431
Galntl5	5	0.56844	0.70519	1	11261	1	0.73013	0.00090452	0.0040406	0.164903	446	3	0.73013
Wdr45b	5	0.99908	0.99907	1	18143	0	0.60881	0.00092491	0.0041312	0.168229	447	5	0.60881
Tnrc6a	5	0.94212	0.94237	1	16344	0	0.87396	0.00093382	0.0041702	0.169069	448	3	0.87396
Sfi1	5	0.054993	0.15014	0.970865	2802	3	-0.39516	0.0009424	0.0042138	0.17046	449	2	-0.39516
Etv1	5	0.99864	0.99862	1	18106	0	0.64711	0.00097195	0.0043488	0.175282	450	5	0.64711
Dio3	5	0.97987	0.98001	1	17333	0	0.4752	0.0009723	0.0043521	0.175282	451	4	0.4752
Brf1	5	0.68641	0.75318	1	12188	1	0.2408	0.00097774	0.0043773	0.175667	452	1	0.2408
Fam76b	5	0.99733	0.99732	1	18010	0	0.57478	0.00097895	0.004387	0.175667	453	5	0.57478
4930549C01Rik	5	0.99902	0.99902	1	18140	0	0.46287	0.00097946	0.0043902	0.175667	454	5	0.46287
Zfp622	5	0.99677	0.99675	1	17984	0	0.64982	0.00098212	0.0044064	0.17593	455	5	0.64982
Ssmem1	5	0.94109	0.94134	1	16317	0	0.70131	0.00098675	0.0044274	0.176385	456	3	0.70131
Prl7d1	5	0.93545	0.93572	1	16180	0	0.99342	0.00099084	0.0044376	0.176411	457	4	0.99342
Gpr123	5	0.98449	0.9846	1	17478	0	0.57796	0.0009952	0.0044548	0.176713	458	4	0.57796
Gltscr2	4	0.99835	0.99833	1	18078	0	1.1825	0.0010009	0.003592	0.153956	459	4	1.1825
Scd2	5	0.99615	0.99612	1	17932	0	1.2604	0.0010059	0.0044984	0.177676	460	5	1.2604
Eid2	5	0.99898	0.99898	1	18136	0	0.37053	0.0010154	0.0045419	0.179013	461	5	0.37053
Klhl38	5	0.99897	0.99897	1	18135	0	0.48583	0.0010253	0.0045861	0.180365	462	5	0.48583
Clock	5	0.98887	0.98893	1	17633	0	0.91855	0.0010324	0.0046226	0.181416	463	4	0.91855
Ythdf1	5	0.99896	0.99895	1	18134	0	0.423	0.0010402	0.0046641	0.182361	464	5	0.423
Actr8	5	0.99817	0.99815	1	18068	0	0.87206	0.001042	0.0046743	0.182361	465	5	0.87206
C1galt1c1	5	0.99768	0.99766	1	18032	0	0.88176	0.0010425	0.0046764	0.182361	466	5	0.88176
Pgap3	5	0.95353	0.95378	1	16645	0	0.55634	0.0010522	0.004727	0.183943	467	3	0.55634
Bbc3	5	0.99892	0.99892	1	18133	0	0.53241	0.0010751	0.0048238	0.187315	468	5	0.53241
Nfatc2ip	5	0.8858	0.88628	1	15056	0	0.56455	0.0010832	0.0048652	0.188525	469	4	0.56455
Med1	5	0.92725	0.92759	1	15993	0	0.14809	0.0010891	0.0048921	0.189169	470	2	0.14809
Nupr1	5	0.99891	0.9989	1	18132	0	0.56637	0.0010922	0.0049072	0.189354	471	5	0.56637
Plcd1	5	0.9989	0.9989	1	18131	0	0.2857	0.0010984	0.0049314	0.18989	472	5	0.2857
Cd24a	5	0.99889	0.99889	1	18130	0	0.48796	0.001109	0.0049841	0.191519	473	5	0.48796
Otud7a	5	0.99889	0.99888	1	18129	0	0.56984	0.0011113	0.0049949	0.191533	474	5	0.56984
Smim20	4	0.99889	0.99887	1	18128	0	0.47418	0.0011127	0.0040089	0.164703	475	4	0.47418
Ywhag	4	0.99888	0.99886	1	18127	0	0.40933	0.0011237	0.0040401	0.164903	476	4	0.40933
Ehmt2	5	0.99888	0.99887	1	18126	0	0.43645	0.0011242	0.0050454	0.193059	477	5	0.43645
Cdc42ep1	5	0.93899	0.93924	1	16262	0	0.65903	0.0011269	0.0050557	0.193059	478	4	0.65903
Tmem135	5	0.99778	0.99776	1	18041	0	0.50289	0.0011347	0.0050933	0.194037	479	5	0.50289
Med20	5	0.95107	0.95131	1	16579	0	0.7561	0.0011413	0.0051234	0.194037	480	4	0.7561
Xrn1	5	0.99012	0.99019	1	17686	0	0.42697	0.0011446	0.005138	0.194037	481	4	0.42697
F11	5	0.99802	0.998	1	18060	0	0.79063	0.0011447	0.005138	0.194037	482	5	0.79063
Slc7a4	5	0.92374	0.9241	1	15909	0	0.58109	0.0011479	0.0051568	0.194037	483	4	0.58109
Slbp	5	0.97686	0.97699	1	17242	0	0.68377	0.0011493	0.0051595	0.194037	484	4	0.68377
Slc38a10	5	0.99655	0.99653	1	17963	0	1.121	0.0011507	0.0051632	0.194037	485	5	1.121
Kat2a	5	0.99302	0.99305	1	17792	0	0.59882	0.0011518	0.005167	0.194037	486	4	0.59882
B4galt1	5	0.99885	0.99884	1	18123	0	0.64111	0.001155	0.0051762	0.194037	487	5	0.64111
Med26	5	0.99115	0.99123	1	17723	0	0.66758	0.0011688	0.0052386	0.19521	488	4	0.66758
Wac	5	0.74969	0.78522	1	12820	1	1.0933	0.0011728	0.0052493	0.19521	489	4	1.0933
Napsa	5	0.99883	0.99882	1	18122	0	0.61441	0.0011728	0.0052498	0.19521	490	5	0.61441
Klhl22	5	0.99881	0.9988	1	18120	0	0.50268	0.0011873	0.0053096	0.197032	491	5	0.50268
Flcn	5	0.99632	0.99629	1	17942	0	0.74422	0.0011915	0.0053262	0.197253	492	5	0.74422
Calcr	5	0.9988	0.99879	1	18119	0	0.48403	0.0011991	0.0053671	0.198368	493	5	0.48403
Fam175a	5	0.99879	0.99878	1	18118	0	0.52058	0.0012111	0.0054231	0.200034	494	5	0.52058
Nudt16l1	5	0.99443	0.99444	1	17857	0	0.5101	0.0012154	0.0054392	0.200228	495	5	0.5101
Prx	5	0.99877	0.99877	1	18117	0	0.38119	0.0012297	0.0054968	0.20154	496	5	0.38119
C1galt1	5	0.99874	0.99873	1	18116	0	0.66787	0.0012616	0.0056398	0.206376	497	5	0.66787
Smim15	3	0.99873	0.99877	1	18115	0	0.66757	0.0012688	0.0036302	0.153956	498	3	0.66757
Mien1	5	0.59941	0.71666	1	11484	1	0.54871	0.0012924	0.0057716	0.210362	499	4	0.54871
Vmn2r35	3	0.91919	0.91926	1	15811	0	1.2842	0.001303	0.0037227	0.156222	500	2	1.2842
Pramef8	5	0.80002	0.81582	1	13472	1	0.74575	0.0013099	0.0058496	0.212221	501	3	0.74575
Podnl1	5	0.85427	0.85654	1	14402	1	0.60969	0.0013132	0.0058679	0.212221	502	4	0.60969
Dera	5	0.99868	0.99867	1	18109	0	0.39697	0.0013161	0.0058803	0.212221	503	5	0.39697
Camsap3	5	0.99868	0.99866	1	18107	0	0.46158	0.0013216	0.0059002	0.212523	504	5	0.46158
Dennd5a	5	0.91963	0.91997	1	15824	0	0.62687	0.0013247	0.0059174	0.212726	505	4	0.62687
Slc25a1	5	0.99646	0.99644	1	17952	0	0.52445	0.0013356	0.0059631	0.213632	506	5	0.52445
Irgc1	5	0.549	0.69036	1	11000	1	0.52765	0.0013365	0.0059658	0.213632	507	4	0.52765
Cylc1	5	0.57183	0.7064	1	11290	1	0.13639	0.0013494	0.0060175	0.214665	508	2	0.13639
Wapal	5	0.17436	0.3372	1	5361	2	1.1621	0.0013496	0.006018	0.214665	509	3	1.1621
Grk1	5	0.99848	0.99848	1	18088	0	0.6282	0.0013547	0.0060363	0.214901	510	5	0.6282
Gria3	5	0.99203	0.99208	1	17754	0	0.63574	0.001363	0.006068	0.214943	511	4	0.63574
Mtmr6	5	0.99864	0.99862	1	18105	0	0.53303	0.0013636	0.0060696	0.214943	512	5	0.53303
Cep192	5	0.99863	0.99862	1	18104	0	0.54322	0.0013676	0.0060842	0.214943	513	5	0.54322
Vwf	5	0.99863	0.99862	1	18103	0	0.33899	0.0013676	0.0060842	0.214943	514	5	0.33899
Gata1	5	0.99861	0.9986	1	18102	0	0.5257	0.0013921	0.0061756	0.217755	515	5	0.5257
Emc1	5	0.96562	0.96582	1	16940	0	0.77841	0.0014004	0.0062073	0.218209	516	3	0.77841
Lamp1	5	0.9986	0.99859	1	18101	0	0.5229	0.0014014	0.0062122	0.218209	517	5	0.5229
Cyba	5	0.79335	0.81142	1	13353	1	0.70004	0.0014175	0.0062757	0.219497	518	3	0.70004
Nr3c2	5	0.99858	0.99857	1	18099	0	0.54159	0.0014207	0.0062918	0.219497	519	5	0.54159
Zranb1	5	0.61892	0.72424	1	11640	1	0.68378	0.001421	0.0062923	0.219497	520	3	0.68378
Ythdc1	5	0.99858	0.99857	1	18098	0	0.59044	0.0014222	0.0062977	0.219497	521	5	0.59044
Cwc27	5	0.62314	0.72588	1	11665	1	-0.0059775	0.0014245	0.0063085	0.219497	522	2	-0.0059775
Usp42	5	0.87223	0.87284	1	14761	1	0.57747	0.0014403	0.00638	0.221567	523	4	0.57747
Trim38	5	0.99854	0.99853	1	18097	0	0.54429	0.0014628	0.0064768	0.224506	524	5	0.54429
Gsdmc4	3	0.99853	0.99856	1	18096	0	1.8089	0.0014704	0.0041686	0.169069	525	3	1.8089
Rxrg	4	0.99853	0.9985	1	18095	0	0.51014	0.0014706	0.0052407	0.19521	526	4	0.51014
Rasl11b	5	0.99853	0.99852	1	18094	0	0.46144	0.0014733	0.006514	0.225099	527	5	0.46144
Sox10	5	0.99852	0.99852	1	18093	0	0.48707	0.001475	0.0065193	0.225099	528	5	0.48707
Usp31	5	0.99852	0.99851	1	18092	0	0.39541	0.0014794	0.0065306	0.225099	529	5	0.39541
Glra2	5	0.99851	0.9985	1	18091	0	0.40782	0.0014932	0.0065973	0.22614	530	5	0.40782
Fanca	5	0.9961	0.99608	1	17929	0	0.45164	0.0014947	0.0066033	0.22614	531	5	0.45164
1700029J07Rik	5	0.6115	0.7213	1	11584	1	0.84658	0.0014957	0.0066081	0.22614	532	3	0.84658
Sik2	5	0.9985	0.9985	1	18090	0	0.58174	0.0014964	0.00661	0.22614	533	5	0.58174
Tecr	5	0.9985	0.99849	1	18089	0	0.34533	0.0015036	0.0066463	0.22696	534	5	0.34533
Ccnd1	5	0.99613	0.99611	1	17930	0	0.72036	0.0015111	0.006677	0.227585	535	5	0.72036
Haus5	4	0.99382	0.99384	1	17829	0	1.1985	0.0015289	0.0054548	0.200401	536	4	1.1985
Hsph1	5	0.81685	0.82759	1	13730	1	0.48452	0.0015387	0.006791	0.231044	537	4	0.48452
Actl6a	5	0.9922	0.99226	1	17757	0	0.90046	0.0015462	0.0068249	0.231769	538	4	0.90046
Napg	5	0.99844	0.99844	1	18085	0	0.47197	0.0015596	0.006876	0.233074	539	5	0.47197
Ywhab	5	0.99841	0.99842	1	18084	0	0.3238	0.0015852	0.0069771	0.235634	540	5	0.3238
Amotl2	5	0.98672	0.98678	1	17549	0	0.62585	0.0015974	0.0070277	0.236907	541	4	0.62585
Cers4	5	0.86951	0.87019	1	14704	1	0.58732	0.0016006	0.0070487	0.23718	542	4	0.58732
Braf	5	0.99828	0.99827	1	18074	0	0.59245	0.0016053	0.0070669	0.237362	543	5	0.59245
Akap6	5	0.99838	0.99838	1	18082	0	0.46385	0.0016173	0.0071137	0.238027	544	5	0.46385
Atad5	5	0.69816	0.75872	1	12294	1	0.55371	0.0016202	0.0071283	0.238027	545	3	0.55371
Polr2i	5	0.99838	0.99837	1	18081	0	0.39012	0.0016226	0.0071385	0.238027	546	5	0.39012
Gpaa1	5	0.99837	0.99836	1	18079	0	0.48543	0.0016318	0.0071756	0.238832	547	5	0.48543
Egflam	5	0.82454	0.83304	1	13859	1	0.78688	0.0016406	0.0072122	0.239616	548	3	0.78688
Spaca7	5	0.63693	0.73154	1	11774	1	0.57137	0.0016453	0.0072353	0.239952	549	4	0.57137
Nudt1	4	0.93509	0.93522	1	16176	0	0.70986	0.0016471	0.0058722	0.212221	550	3	0.70986
Acsl1	5	0.85054	0.85339	1	14316	1	0.46051	0.0016589	0.0072977	0.241543	551	4	0.46051
Siglece	5	0.8533	0.8557	1	14378	1	0.67393	0.001661	0.0073096	0.241543	552	4	0.67393
Lrrc58	5	0.99831	0.9983	1	18076	0	0.33761	0.0016917	0.0074333	0.244753	553	5	0.33761
Ctage5	5	0.9983	0.99829	1	18075	0	0.44828	0.0016997	0.0074709	0.245553	554	5	0.44828
Tssc1	5	0.87112	0.87176	1	14736	1	0.76963	0.0017049	0.0074903	0.245751	555	4	0.76963
Msantd1	5	0.99827	0.99826	1	18073	0	0.26718	0.0017259	0.0075747	0.247621	556	5	0.26718
Spon2	5	0.080055	0.19138	1	3285	1	0.48877	0.0017325	0.0076006	0.247621	557	4	0.48877
Pnkp	5	0.23364	0.41901	1	6551	2	0.61297	0.0017367	0.0076205	0.247621	558	3	0.61297
Nucb1	5	0.94403	0.94427	1	16380	0	0.76655	0.0017387	0.0076296	0.247621	559	3	0.76655
Ppapdc1b	5	0.97542	0.97558	1	17196	0	0.73917	0.0017406	0.0076409	0.247621	560	4	0.73917
Actr5	5	0.91585	0.91613	1	15735	0	0.6065	0.0017408	0.0076414	0.247621	561	4	0.6065
Efcab3	5	0.99826	0.99824	1	18071	0	0.76707	0.0017409	0.0076414	0.247621	562	5	0.76707
Idh2	5	0.54942	0.69076	1	11009	1	0.68596	0.0017644	0.0077367	0.249296	563	3	0.68596
Daglb	5	0.62399	0.72624	1	11672	1	0.71189	0.0017647	0.0077372	0.249296	564	4	0.71189
Msl1	5	0.98495	0.98507	1	17492	0	0.59228	0.0017688	0.0077582	0.249296	565	4	0.59228
Nrp2	5	0.83586	0.84164	1	14059	1	0.57465	0.0017693	0.0077609	0.249296	566	4	0.57465
Ehhadh	5	0.98733	0.98737	1	17575	0	0.66924	0.0017743	0.0077786	0.249431	567	4	0.66924
Haus1	5	0.8761	0.87663	1	14845	1	0.81347	0.0017828	0.0078136	0.250116	568	4	0.81347
Pdcl2	5	0.41281	0.57015	1	8939	1	0.088547	0.0017907	0.0078534	0.250954	569	2	0.088547
Cadm4	5	0.99821	0.99819	1	18070	0	0.23833	0.0017941	0.0078674	0.250965	570	5	0.23833
Ssh1	5	0.99818	0.99817	1	18069	0	0.28803	0.0018201	0.0079895	0.254419	571	5	0.28803
Ssxb8	2	0.99816	0.99812	1	18066	0	0.96142	0.0018364	0.0036108	0.153956	572	2	0.96142
Mios	5	0.79443	0.81213	1	13368	1	0.86844	0.0018399	0.008075	0.256547	573	3	0.86844
Bclaf1	5	0.49524	0.64205	1	10145	1	0.50157	0.0018422	0.0080842	0.256547	574	4	0.50157
Znrd1	5	0.32438	0.49459	1	7710	1	0.65927	0.0018583	0.0081573	0.25791	575	4	0.65927
1700021F07Rik	5	0.99814	0.99813	1	18065	0	0.31785	0.0018587	0.00816	0.25791	576	5	0.31785
Txndc17	5	0.87282	0.87344	1	14773	1	0.75993	0.0018604	0.0081692	0.25791	577	4	0.75993
Syce1	5	0.99748	0.99747	1	18018	0	0.59672	0.0018838	0.0082665	0.259918	578	5	0.59672
B3galt6	5	0.97544	0.97559	1	17197	0	0.51254	0.0018858	0.0082746	0.259918	579	4	0.51254
4921507P07Rik	5	0.99811	0.9981	1	18064	0	0.39852	0.0018859	0.0082751	0.259918	580	5	0.39852
Rwdd4a	5	0.66556	0.74367	1	12016	1	0.64455	0.0019221	0.0084209	0.264046	581	4	0.64455
Smc3	5	0.99728	0.99727	1	18008	0	0.87928	0.0019389	0.0084865	0.265651	582	5	0.87928
Fxyd1	5	0.96615	0.96633	1	16954	0	0.51552	0.0019447	0.0085075	0.265856	583	4	0.51552
Rreb1	4	0.99805	0.99804	1	18063	0	0.54399	0.0019483	0.0069352	0.234648	584	4	0.54399
Erich1	5	0.74368	0.78185	1	12753	1	0.53317	0.0019534	0.0085398	0.266412	585	4	0.53317
BC068157	5	0.98986	0.98993	1	17671	0	0.57423	0.0019598	0.0085661	0.266782	586	4	0.57423
Map2k3	5	0.99802	0.99801	1	18062	0	0.46157	0.0019759	0.0086301	0.267934	587	5	0.46157
Carkd	5	0.99802	0.99801	1	18061	0	0.52225	0.0019773	0.0086366	0.267934	588	5	0.52225
Mob1b	5	0.99489	0.9949	1	17874	0	0.64353	0.0019824	0.0086608	0.267934	589	5	0.64353
Odf2l	5	0.16792	0.32774	1	5228	3	-0.25064	0.0019826	0.0086613	0.267934	590	2	-0.25064
Mctp1	5	0.99667	0.99665	1	17977	0	0.72623	0.0019874	0.0086829	0.268149	591	5	0.72623
Eif1ax	5	0.99799	0.99797	1	18058	0	0.73905	0.0020099	0.0087813	0.270638	592	5	0.73905
Isg20	5	0.99799	0.99797	1	18057	0	0.39837	0.0020127	0.0087929	0.270638	593	5	0.39837
Copb1	5	0.94122	0.94147	1	16322	0	0.93202	0.0020186	0.0088179	0.270668	594	4	0.93202
Zc3h7a	5	0.99798	0.99796	1	18056	0	0.76417	0.0020201	0.0088233	0.270668	595	5	0.76417
Banp	5	0.47816	0.62696	1	9877	2	-0.31634	0.002031	0.0088754	0.271816	596	2	-0.31634
Camk2n1	5	0.73178	0.77551	1	12631	1	0.49795	0.0020459	0.0089271	0.272375	597	3	0.49795
Egln3	5	0.99795	0.99793	1	18054	0	0.32796	0.0020481	0.0089395	0.272375	598	5	0.32796
Gm4981	5	0.99795	0.99793	1	18055	0	0.45548	0.0020481	0.0089395	0.272375	599	5	0.45548
Irak2	5	0.93804	0.93828	1	16236	0	0.42663	0.0020519	0.0089529	0.272375	600	4	0.42663
Ntf5	5	0.9935	0.99352	1	17813	0	0.46052	0.002061	0.0089873	0.272713	601	4	0.46052
Tex261	5	0.96676	0.96696	1	16975	0	0.40828	0.0020651	0.0090029	0.272713	602	4	0.40828
Myt1l	4	0.99793	0.99793	1	18053	0	0.40637	0.0020662	0.0073655	0.242956	603	4	0.40637
Gm4846	5	0.99793	0.99791	1	18052	0	0.48051	0.0020737	0.0090395	0.272713	604	5	0.48051
Aff1	5	0.43826	0.59212	1	9319	1	0.96705	0.0020767	0.0090481	0.272713	605	3	0.96705
Tpcn2	5	0.99411	0.99413	1	17840	0	0.54906	0.0020771	0.0090492	0.272713	606	4	0.54906
Zfp712	5	0.92887	0.92919	1	16032	0	0.86209	0.0020789	0.0090589	0.272713	607	3	0.86209
Ubald1	5	0.99792	0.9979	1	18051	0	0.33935	0.0020829	0.0090815	0.272713	608	5	0.33935
Pmepa1	5	0.9979	0.99788	1	18050	0	0.37646	0.0021006	0.0091552	0.274113	609	5	0.37646
Camk1	5	0.9979	0.99787	1	18049	0	0.42786	0.0021018	0.0091589	0.274113	610	5	0.42786
Nyap1	5	0.99788	0.99786	1	18047	0	0.37075	0.0021202	0.0092488	0.276352	611	5	0.37075
Cacng6	5	0.98051	0.98066	1	17363	0	0.50451	0.0021278	0.0092816	0.276883	612	4	0.50451
Zscan5b	5	0.98993	0.98999	1	17678	0	0.59831	0.0021311	0.0092993	0.276963	613	4	0.59831
Fam174b	5	0.61773	0.72378	1	11624	1	0.66687	0.0021346	0.0093165	0.277028	614	4	0.66687
Bcl6	5	0.99785	0.99783	1	18046	0	0.57734	0.0021486	0.009373	0.278173	615	5	0.57734
Hmx2	5	0.96159	0.96179	1	16842	0	0.4613	0.0021533	0.0093918	0.278173	616	4	0.4613
Stim2	5	0.99784	0.99782	1	18045	0	0.33685	0.0021568	0.009408	0.278173	617	5	0.33685
Chrna6	5	0.99784	0.99781	1	18044	0	0.30525	0.0021588	0.0094155	0.278173	618	5	0.30525
Mum1l1	4	0.99783	0.99783	1	18043	0	0.44608	0.0021677	0.0077372	0.249296	619	4	0.44608
Irak4	5	0.42743	0.58273	1	9153	1	0.62724	0.0021703	0.0094575	0.278899	620	4	0.62724
Kl	5	0.99783	0.9978	1	18042	0	0.26422	0.0021737	0.0094704	0.278899	621	5	0.26422
Apex2	5	0.88494	0.88542	1	15031	0	0.43552	0.0021791	0.0094941	0.279149	622	4	0.43552
Prmt3	5	0.98078	0.98093	1	17369	0	0.60641	0.0021911	0.0095468	0.280252	623	4	0.60641
Ccdc136	5	0.51796	0.66229	1	10492	1	0.53697	0.0021992	0.0095866	0.280468	624	4	0.53697
Dnajc2	5	0.26326	0.44358	1	6933	1	0.6088	0.0022032	0.0096027	0.280468	625	4	0.6088
Ap3b1	5	0.98797	0.98802	1	17595	0	0.34985	0.0022058	0.0096151	0.280468	626	4	0.34985
Noxred1	5	0.94455	0.9448	1	16394	0	0.49114	0.0022172	0.0096624	0.281403	627	4	0.49114
Sun1	5	0.79765	0.81421	1	13435	1	0.70856	0.0022361	0.0097474	0.282982	628	4	0.70856
Tmem161b	5	0.99775	0.99772	1	18039	0	0.32464	0.002251	0.0098066	0.284252	629	5	0.32464
Tmem231	5	0.99774	0.99772	1	18038	0	0.4896	0.0022599	0.0098469	0.2849	630	5	0.4896
Eif4g3	5	0.99773	0.9977	1	18037	0	0.2366	0.0022728	0.0098948	0.2849	631	5	0.2366
Mapk3	5	0.99773	0.9977	1	18036	0	0.42961	0.0022732	0.0098986	0.2849	632	5	0.42961
Jkamp	5	0.99691	0.99691	1	17991	0	0.6382	0.0022763	0.0099104	0.2849	633	5	0.6382
Emc2	5	0.60853	0.72013	1	11557	1	0.73939	0.0022779	0.0099228	0.2849	634	4	0.73939
Itgb1bp1	5	0.99772	0.99769	1	18035	0	0.39297	0.002281	0.0099335	0.2849	635	5	0.39297
C2cd3	5	0.97178	0.97187	1	17109	0	0.56585	0.0022825	0.0099373	0.2849	636	4	0.56585
Gabrb1	5	0.99771	0.99769	1	18034	0	0.45269	0.0022874	0.0099637	0.285212	637	5	0.45269
Xylt1	5	0.63523	0.73082	1	11763	1	0.53178	0.0023027	0.010024	0.286354	638	3	0.53178
Trappc2l	5	0.99707	0.99706	1	17998	0	0.62197	0.0023054	0.010035	0.286354	639	5	0.62197
Ascl2	5	0.99768	0.99766	1	18033	0	0.24725	0.0023171	0.010082	0.287029	640	5	0.24725
Atxn7	5	0.50289	0.6489	1	10255	1	0.57995	0.0023192	0.01009	0.287029	641	4	0.57995
Fam136a	5	0.99767	0.99765	1	18031	0	0.31693	0.0023267	0.010123	0.287549	642	5	0.31693
Aen	5	0.99734	0.99734	1	18011	0	0.69086	0.0023385	0.010171	0.28802	643	5	0.69086
Csrp2bp	5	0.99436	0.99437	1	17854	0	0.63649	0.0023551	0.010247	0.289707	644	4	0.63649
Trrap	5	0.26442	0.44454	1	6940	2	0.26883	0.0023685	0.0103	0.290781	645	3	0.26883
Rpa1	5	0.64891	0.73652	1	11871	1	0.41131	0.0023732	0.010321	0.290912	646	3	0.41131
Gp5	5	0.99762	0.9976	1	18029	0	0.36208	0.0023786	0.010343	0.291085	647	5	0.36208
Mybl2	5	0.99761	0.99759	1	18028	0	0.5936	0.0023861	0.010369	0.291085	648	5	0.5936
Epn2	5	0.99761	0.99758	1	18026	0	0.48369	0.002391	0.01039	0.291085	649	5	0.48369
Zfp616	5	0.99761	0.99758	1	18027	0	0.47979	0.002391	0.01039	0.291085	650	5	0.47979
Grtp1	5	0.99759	0.99756	1	18025	0	0.36886	0.0024139	0.010479	0.293133	651	5	0.36886
Rnf25	5	0.99757	0.99754	1	18023	0	0.48093	0.0024343	0.010554	0.294769	652	5	0.48093
Mthfsd	5	0.99756	0.99753	1	18022	0	0.38718	0.0024397	0.01058	0.295057	653	5	0.38718
Prl5a1	5	0.13813	0.28278	1	4544	1	1.006	0.0024642	0.010689	0.297202	654	3	1.006
Arih2	5	0.99752	0.9975	1	18020	0	0.25021	0.0024763	0.010737	0.298068	655	5	0.25021
Zfp296	5	0.98207	0.9822	1	17400	0	0.6509	0.0024877	0.010789	0.299065	656	4	0.6509
Tmem44	5	0.75807	0.78995	1	12906	1	0.39989	0.0024995	0.010833	0.299445	657	4	0.39989
Mlh3	5	0.9975	0.99748	1	18019	0	0.31685	0.0025	0.010835	0.299445	658	5	0.31685
Tacc2	5	0.96705	0.96724	1	16983	0	0.35461	0.0025076	0.010871	0.299557	659	4	0.35461
Fkbp3	5	0.99747	0.99745	1	18017	0	0.56673	0.0025333	0.010974	0.301485	660	5	0.56673
Tas2r116	5	0.99746	0.99745	1	18016	0	0.54359	0.0025448	0.011024	0.302268	661	5	0.54359
Pkp3	5	0.96924	0.96935	1	17038	0	0.66031	0.0025476	0.011036	0.302268	662	3	0.66031
H3f3b	4	0.99319	0.9932	1	17799	0	0.71035	0.0025614	0.0090825	0.272713	663	4	0.71035
Pard3b	5	0.99742	0.99742	1	18015	0	0.41061	0.0025755	0.011165	0.305364	664	5	0.41061
Tas2r108	5	0.8736	0.87419	1	14787	1	0.89537	0.0025868	0.011222	0.305958	665	3	0.89537
Acsl4	5	0.99741	0.99741	1	18014	0	0.51122	0.0025897	0.011231	0.305958	666	5	0.51122
Cog8	5	0.42492	0.5805	1	9112	1	0.47527	0.0025963	0.011249	0.305958	667	4	0.47527
Slc16a1	5	0.50482	0.65065	1	10283	1	0.42719	0.0026116	0.011311	0.306836	668	4	0.42719
Wwp2	5	0.56918	0.70546	1	11273	1	0.46108	0.0026179	0.011336	0.306836	669	3	0.46108
Nek5	5	0.59631	0.71545	1	11457	1	0.49328	0.0026191	0.011342	0.306836	670	4	0.49328
Akap9	5	0.99738	0.99738	1	18013	0	0.6256	0.0026213	0.011353	0.306836	671	5	0.6256
Ccdc110	5	0.9954	0.9954	1	17896	0	0.53286	0.002638	0.011416	0.308099	672	5	0.53286
Cluap1	5	0.99735	0.99734	1	18012	0	0.57938	0.0026491	0.01146	0.308837	673	5	0.57938
Pigyl	5	0.57374	0.70707	1	11302	1	0.58407	0.0026839	0.011614	0.312147	674	3	0.58407
Mesp1	5	0.37691	0.53924	1	8407	2	0.62405	0.0026898	0.011641	0.312147	675	3	0.62405
Thop1	5	0.99731	0.9973	1	18009	0	0.48728	0.0026899	0.011641	0.312147	676	5	0.48728
Atraid	5	0.88117	0.88163	1	14957	0	0.39496	0.0026957	0.011661	0.312147	677	4	0.39496
Naa60	5	0.99624	0.99621	1	17934	0	0.5579	0.0026976	0.011668	0.312147	678	5	0.5579
Snx6	5	0.68936	0.75456	1	12218	1	0.2655	0.002706	0.011705	0.31234	679	3	0.2655
Gsdmcl1	5	0.98971	0.98979	1	17665	0	0.53479	0.0027079	0.011711	0.31234	680	4	0.53479
Actn1	5	0.9968	0.99678	1	17986	0	0.50035	0.0027127	0.011726	0.31234	681	5	0.50035
Brsk1	5	0.99726	0.99725	1	18007	0	0.37862	0.0027396	0.011835	0.314793	682	5	0.37862
Rasgrp1	4	0.61876	0.66916	1	11637	1	0.55627	0.0027433	0.0096893	0.28174	683	3	0.55627
Hook3	5	0.99723	0.99723	1	18005	0	0.56471	0.0027668	0.011948	0.316967	684	5	0.56471
Slc45a2	5	0.99155	0.99163	1	17734	0	0.43401	0.0027687	0.011956	0.316967	685	4	0.43401
Herc3	5	0.9203	0.92064	1	15841	0	0.7543	0.0027868	0.012028	0.318076	686	4	0.7543
1810009J06Rik	5	0.99276	0.99281	1	17781	0	0.3929	0.0028042	0.012096	0.318864	687	4	0.3929
Cdh5	5	0.99295	0.99298	1	17789	0	0.51713	0.0028065	0.012108	0.318864	688	4	0.51713
Sox7	5	0.25517	0.43681	1	6813	1	0.6252	0.0028315	0.012218	0.320793	689	4	0.6252
Coro7	5	0.99716	0.99715	1	18004	0	0.3866	0.0028389	0.012252	0.321239	690	5	0.3866
Kras	5	0.93004	0.93036	1	16054	0	0.80602	0.0028661	0.012365	0.32374	691	4	0.80602
Fam53a	5	0.99712	0.9971	1	18003	0	0.30272	0.0028835	0.012435	0.324299	692	5	0.30272
Copb2	5	0.99711	0.99709	1	18001	0	1.0098	0.0028844	0.012439	0.324299	693	5	1.0098
Thsd1	5	0.21761	0.39938	1	6231	1	0.50612	0.0028939	0.012474	0.324587	694	3	0.50612
Fxyd5	5	0.97485	0.97498	1	17183	0	0.55031	0.0029021	0.012505	0.324587	695	4	0.55031
Trim66	5	0.99709	0.99708	1	18000	0	0.3938	0.002907	0.012522	0.324587	696	5	0.3938
Rbm8a	5	0.5875	0.7121	1	11394	1	0.94142	0.0029072	0.012523	0.324587	697	4	0.94142
4930402K13Rik	5	0.79154	0.81029	1	13328	1	0.60397	0.0029131	0.012549	0.324587	698	3	0.60397
Vps29	5	0.90864	0.90902	1	15557	0	0.71401	0.0029158	0.012558	0.324587	699	3	0.71401
Rbm39	5	0.99708	0.99707	1	17999	0	0.73243	0.0029208	0.012574	0.324587	700	5	0.73243
Slc25a17	5	0.99707	0.99706	1	17997	0	0.43065	0.0029308	0.012608	0.32502	701	5	0.43065
Egln1	5	0.99338	0.99339	1	17808	0	0.47332	0.0029361	0.012633	0.325216	702	4	0.47332
Cenpk	5	0.50238	0.64843	1	10245	1	1.3089	0.0029434	0.012666	0.325592	703	4	1.3089
Srrt	5	0.99	0.99006	1	17682	0	0.58276	0.0029627	0.012744	0.327043	704	3	0.58276
Zp3	5	0.99703	0.99703	1	17995	0	0.2379	0.002967	0.012758	0.327043	705	5	0.2379
Xlr3b	2	0.99702	0.99697	1	17994	0	0.99507	0.0029777	0.0058529	0.212221	706	2	0.99507
Hcfc1	5	0.99607	0.99604	1	17926	0	0.92413	0.003037	0.013036	0.33308	707	5	0.92413
Ubac2	5	0.99696	0.99694	1	17993	0	0.39033	0.0030416	0.01306	0.33308	708	5	0.39033
Cblc	5	0.99695	0.99694	1	17992	0	0.31178	0.003047	0.013084	0.33308	709	5	0.31178
Pqlc3	5	0.99635	0.99632	1	17945	0	0.72328	0.0030629	0.013146	0.334206	710	5	0.72328
Gtf2b	5	0.52899	0.67226	1	10671	1	0.5245	0.0030728	0.013186	0.334756	711	3	0.5245
Rnf139	5	0.99691	0.9969	1	17990	0	0.54304	0.0030929	0.013263	0.336245	712	5	0.54304
Lgals1	4	0.99691	0.99694	1	17989	0	0.65099	0.0030942	0.0109	0.299879	713	4	0.65099
Nsun5	5	0.9969	0.99689	1	17988	0	0.55028	0.0031028	0.013303	0.336804	714	5	0.55028
Prss36	5	0.77545	0.80028	1	13115	1	0.6407	0.0031221	0.013381	0.3383	715	3	0.6407
Ctdnep1	5	0.070606	0.1759	1	3097	1	0.78094	0.0031441	0.013473	0.339846	716	4	0.78094
Gripap1	5	0.99628	0.99625	1	17938	0	0.48076	0.0031487	0.013487	0.339846	717	5	0.48076
Mpp1	5	0.98287	0.98296	1	17429	0	0.46687	0.0031536	0.013506	0.339846	718	4	0.46687
Csnk2a2	5	0.9383	0.93855	1	16245	0	0.64836	0.0031739	0.013595	0.341368	719	3	0.64836
2024-03-10	5	0.99682	0.99681	1	17987	0	0.29055	0.0031806	0.013627	0.341557	720	5	0.29055
Arf4	5	0.4872	0.63493	1	10022	1	0.95903	0.0031841	0.013639	0.341557	721	3	0.95903
Gcnt2	14	0.90675	0.971	1	15507	3	0.36861	0.0031971	0.020586	0.426216	722	8	0.36861
Pnmt	5	0.99679	0.99678	1	17985	0	0.34656	0.0032116	0.013747	0.343384	723	5	0.34656
Tm2d2	5	0.8453	0.84906	1	14208	1	0.5991	0.0032125	0.01375	0.343384	724	4	0.5991
Csmd1	5	0.99676	0.99675	1	17983	0	0.32889	0.0032366	0.01386	0.344283	725	5	0.32889
Gtf2a1l	5	0.82727	0.83507	1	13900	1	0.67281	0.0032521	0.013917	0.345142	726	3	0.67281
5430419D17Rik	5	0.99675	0.99674	1	17982	0	0.38037	0.0032543	0.013932	0.345142	727	5	0.38037
Mylk	5	0.99673	0.99672	1	17981	0	0.47896	0.0032652	0.013974	0.345522	728	5	0.47896
Efhc2	5	0.73009	0.77463	1	12614	1	0.2655	0.0032685	0.013987	0.345522	729	3	0.2655
Fen1	5	0.90735	0.90773	1	15518	0	0.45721	0.0032763	0.014019	0.345522	730	3	0.45721
Foxp1	5	0.99316	0.99319	1	17797	0	0.36099	0.0032819	0.014037	0.345522	731	4	0.36099
Mboat4	5	0.99672	0.9967	1	17980	0	0.32346	0.0032838	0.014042	0.345522	732	5	0.32346
Pdia5	5	0.9967	0.99669	1	17979	0	0.40544	0.0032954	0.014083	0.346079	733	5	0.40544
Cwh43	5	0.91985	0.9202	1	15830	0	0.818	0.0033038	0.014119	0.346488	734	3	0.818
Zmat5	5	0.99668	0.99667	1	17978	0	0.52722	0.0033171	0.014179	0.347504	735	5	0.52722
Ppp1r7	5	0.73369	0.7765	1	12653	1	0.73912	0.0033284	0.01422	0.348055	736	4	0.73912
Dcstamp	5	0.99666	0.99664	1	17976	0	0.31807	0.0033442	0.014272	0.348563	737	5	0.31807
Npvf	5	0.3531	0.51887	1	8092	1	0.60901	0.0033464	0.014279	0.348563	738	3	0.60901
Ube2f	5	0.99664	0.99662	1	17975	0	0.43648	0.0033644	0.014354	0.349789	739	5	0.43648
Pigh	5	0.99663	0.99661	1	17974	0	0.5092	0.0033691	0.014367	0.349789	740	5	0.5092
Zbtb20	5	0.99662	0.99661	1	17973	0	0.46511	0.0033765	0.014399	0.350107	741	5	0.46511
Nudt9	5	0.99662	0.9966	1	17972	0	0.49175	0.0033823	0.014418	0.350107	742	5	0.49175
Fitm2	5	0.9966	0.99657	1	17971	0	0.38303	0.0034027	0.014498	0.351348	743	5	0.38303
Pigt	4	0.97563	0.97586	1	17202	0	0.65218	0.0034035	0.011968	0.316967	744	3	0.65218
Npas1	5	0.99659	0.99657	1	17970	0	0.33324	0.0034051	0.014507	0.351348	745	5	0.33324
Gtf2i	5	0.99658	0.99656	1	17969	0	0.34395	0.0034158	0.014548	0.351875	746	5	0.34395
Art4	5	0.99657	0.99655	1	17967	0	0.53535	0.0034259	0.014584	0.352271	747	5	0.53535
Acox3	5	0.99656	0.99653	1	17966	0	0.39372	0.0034435	0.014655	0.353535	748	5	0.39372
Fbxo33	4	0.99655	0.9966	1	17964	0	0.30245	0.0034456	0.012109	0.318864	749	4	0.30245
Marf1	5	0.99651	0.99649	1	17962	0	0.72355	0.0034868	0.014836	0.356391	750	5	0.72355
Slc35a4	5	0.99651	0.99649	1	17961	0	0.41881	0.0034902	0.014847	0.356391	751	5	0.41881
9130023H24Rik	5	0.99651	0.99648	1	17959	0	0.36309	0.0034944	0.014865	0.356391	752	5	0.36309
Zbtb14	5	0.98445	0.98457	1	17475	0	0.50021	0.0034984	0.014876	0.356391	753	4	0.50021
Mesdc2	5	0.17582	0.3393	1	5393	1	0.67184	0.0035077	0.01491	0.356391	754	4	0.67184
Chtf18	5	0.096768	0.21831	1	3637	1	0.61851	0.0035115	0.014929	0.356391	755	3	0.61851
Mettl7b	5	0.92761	0.92792	1	16002	0	0.72296	0.0035118	0.01493	0.356391	756	4	0.72296
Zfp957	5	0.99648	0.99646	1	17956	0	0.27907	0.0035172	0.014956	0.356391	757	5	0.27907
Sepw1	5	0.99648	0.99645	1	17955	0	0.28325	0.0035217	0.014977	0.356391	758	5	0.28325
Fat3	5	0.99648	0.99645	1	17954	0	0.60454	0.0035248	0.014987	0.356391	759	5	0.60454
Mark4	4	0.99647	0.9965	1	17953	0	0.49792	0.0035303	0.012397	0.324124	760	4	0.49792
Sirt1	5	0.40089	0.55988	1	8741	1	0.51223	0.0035402	0.015054	0.356784	761	4	0.51223
Drosha	5	0.99255	0.99261	1	17768	0	0.33166	0.0035442	0.015069	0.356784	762	4	0.33166
Smarca4	5	0.98898	0.98906	1	17636	0	0.7391	0.0035506	0.015092	0.356784	763	4	0.7391
Scrib	5	0.99558	0.99558	1	17908	0	0.65279	0.0035542	0.015105	0.356784	764	5	0.65279
Zxdb	5	0.75122	0.78606	1	12836	1	0.60118	0.0035604	0.015123	0.356784	765	4	0.60118
Vsig4	5	0.99644	0.99641	1	17951	0	0.24414	0.0035618	0.015129	0.356784	766	5	0.24414
Col1a2	5	0.99643	0.9964	1	17950	0	0.2933	0.0035652	0.015139	0.356784	767	5	0.2933
Dctn2	5	0.98337	0.98347	1	17442	0	0.66319	0.003577	0.015189	0.356844	768	4	0.66319
Fam178a	5	0.99642	0.99639	1	17949	0	0.60809	0.0035806	0.015208	0.356844	769	5	0.60809
Tfrc	5	0.43604	0.59018	1	9277	1	0.18532	0.0035831	0.01522	0.356844	770	2	0.18532
Aamdc	9	0.84341	0.9183	1	14180	1	0.32366	0.0035836	0.019077	0.406876	771	7	0.32366
Srsf5	5	0.9964	0.99637	1	17948	0	0.50512	0.003597	0.015275	0.356844	772	5	0.50512
Fscn3	5	0.60937	0.72047	1	11565	1	0.59179	0.0035975	0.015277	0.356844	773	4	0.59179
Fam135b	5	0.99639	0.99636	1	17947	0	0.36296	0.003606	0.015309	0.357132	774	5	0.36296
Fgf13	5	0.99638	0.99635	1	17946	0	0.41749	0.003619	0.015358	0.357833	775	5	0.41749
Klra10	2	0.93748	0.93745	1	16222	0	2.023	0.003652	0.0071358	0.238027	776	2	2.023
Cd47	5	0.99634	0.99631	1	17944	0	0.32068	0.0036641	0.015537	0.36118	777	5	0.32068
Oaf	5	0.90676	0.90713	1	15508	0	0.62468	0.0036651	0.015541	0.36118	778	3	0.62468
Golga7	3	0.69211	0.69297	1	12241	1	0.80538	0.0036655	0.010161	0.28802	779	2	0.80538
D1Pas1	5	0.99632	0.9963	1	17943	0	0.29889	0.0036779	0.015591	0.361785	780	5	0.29889
Itga6	5	0.93564	0.93591	1	16186	0	0.65116	0.0036851	0.015619	0.361785	781	4	0.65116
Tfdp1	5	0.99631	0.99629	1	17941	0	0.80705	0.0036868	0.015626	0.361785	782	5	0.80705
Vps52	5	0.9963	0.99627	1	17940	0	0.43561	0.0037032	0.015688	0.362266	783	5	0.43561
Fam155a	5	0.99629	0.99626	1	17939	0	0.20436	0.0037077	0.015708	0.362266	784	5	0.20436
Rmi2	5	0.57075	0.706	1	11285	1	0.48129	0.0037102	0.01572	0.362266	785	4	0.48129
Gnrh1	5	0.38022	0.54204	1	8453	2	0.11174	0.0037113	0.015726	0.362266	786	2	0.11174
Ebna1bp2	5	0.99626	0.99622	1	17936	0	0.416	0.0037447	0.015851	0.364697	787	5	0.416
Tll1	5	0.99624	0.99621	1	17935	0	0.4511	0.0037639	0.015922	0.365395	788	5	0.4511
Syne4	5	0.98571	0.98581	1	17521	0	0.4559	0.0037654	0.015927	0.365395	789	4	0.4559
Htra2	5	0.96742	0.9676	1	16991	0	0.49955	0.0037748	0.015961	0.365395	790	4	0.49955
Mfsd5	5	0.99619	0.99616	1	17933	0	0.76003	0.0038149	0.016128	0.368753	791	5	0.76003
Nyap2	5	0.9219	0.92223	1	15872	0	0.41866	0.0038313	0.016195	0.369844	792	4	0.41866
Gm10094	3	0.91724	0.9173	1	15766	0	0.091274	0.0038349	0.010616	0.295614	793	1	0.091274
Ing1	5	0.94019	0.94043	1	16293	0	0.52109	0.0038481	0.016269	0.371054	794	3	0.52109
Zscan2	5	0.99615	0.99612	1	17931	0	0.34235	0.0038547	0.016294	0.371183	795	5	0.34235
Dscr3	5	0.98527	0.98538	1	17500	0	0.48992	0.0038746	0.016376	0.372124	796	4	0.48992
Kctd3	5	0.88975	0.89023	1	15147	0	0.5424	0.0038827	0.01641	0.372435	797	4	0.5424
Tmem184c	5	0.97684	0.97697	1	17240	0	0.52459	0.003891	0.016444	0.372738	798	4	0.52459
Mpp7	5	0.40128	0.56022	1	8751	1	0.52802	0.0039059	0.016514	0.373562	799	4	0.52802
Cd300a	5	0.99608	0.99606	1	17928	0	0.40499	0.0039153	0.016545	0.373562	800	5	0.40499
Pcgf1	5	0.88446	0.88496	1	15016	0	0.5224	0.003918	0.01656	0.373562	801	4	0.5224
Disp2	5	0.99608	0.99606	1	17927	0	0.34054	0.0039186	0.016561	0.373562	802	5	0.34054
Polr3h	5	0.7493	0.78502	1	12816	1	0.41698	0.0039342	0.01662	0.374416	803	3	0.41698
Bst2	5	0.99606	0.99604	1	17925	0	0.33039	0.0039406	0.01664	0.374416	804	5	0.33039
Krit1	5	0.98172	0.98186	1	17394	0	0.8786	0.0039598	0.016712	0.375338	805	4	0.8786
Vmn1r235	4	0.99604	0.99603	1	17924	0	0.60485	0.0039612	0.013823	0.344146	806	4	0.60485
Prkdc	5	0.94219	0.94243	1	16347	0	0.59209	0.0039617	0.016722	0.375338	807	4	0.59209
St8sia2	5	0.99596	0.99595	1	17923	0	0.36515	0.0040365	0.017023	0.381266	808	5	0.36515
Tm2d3	5	0.98926	0.98933	1	17650	0	0.5203	0.0040384	0.017027	0.381266	809	4	0.5203
Prdm10	5	0.98073	0.98088	1	17367	0	0.27358	0.0040658	0.017143	0.38339	810	4	0.27358
Saa2	3	0.88739	0.88746	1	15097	0	0.96596	0.0040695	0.011254	0.305958	811	2	0.96596
Gcdh	5	0.24219	0.42611	1	6654	2	0.55134	0.0040854	0.017216	0.384478	812	3	0.55134
Wdr7	5	0.54833	0.68973	1	10986	1	0.64675	0.0040939	0.017252	0.384478	813	3	0.64675
Fbxl3	5	0.96977	0.96988	1	17049	0	0.53829	0.0040946	0.017254	0.384478	814	4	0.53829
Plekha5	5	0.99398	0.99399	1	17837	0	0.44737	0.0041081	0.017303	0.385091	815	4	0.44737
Ino80c	5	0.99588	0.99587	1	17921	0	0.4045	0.0041221	0.017366	0.386037	816	5	0.4045
Med22	5	0.98609	0.98618	1	17531	0	0.50112	0.0041503	0.017475	0.387996	817	4	0.50112
Iscu	5	0.78387	0.80547	1	13228	1	0.35675	0.0041571	0.017508	0.388256	818	3	0.35675
Lancl2	5	0.64342	0.73426	1	11824	1	0.62196	0.0041797	0.017606	0.389941	819	4	0.62196
Klra2	5	0.94449	0.94474	1	16392	0	0.51784	0.0041853	0.017626	0.389941	820	4	0.51784
Spint2	5	0.98699	0.98705	1	17557	0	0.4697	0.0041952	0.017675	0.390554	821	3	0.4697
Itsn2	5	0.99578	0.99577	1	17920	0	0.37548	0.0042156	0.017758	0.391445	822	5	0.37548
Add1	5	0.99576	0.99574	1	17919	0	0.27825	0.0042406	0.017863	0.393024	823	5	0.27825
Ret	5	0.98846	0.98852	1	17616	0	0.49918	0.0042509	0.017904	0.393024	824	4	0.49918
Shc1	5	0.99575	0.99573	1	17918	0	0.39538	0.0042516	0.017907	0.393024	825	5	0.39538
Zfp273	5	0.55315	0.69419	1	11066	1	0.36603	0.0042532	0.017915	0.393024	826	4	0.36603
Triobp	10	0.99859	0.99859	1	18100	0	0.32831	0.0042567	0.023381	0.454917	827	7	0.32831
Kctd15	5	0.99572	0.99571	1	17917	0	0.1927	0.0042753	0.018002	0.394454	828	5	0.1927
Gosr1	5	0.99571	0.9957	1	17915	0	1.0066	0.0042867	0.018044	0.394915	829	5	1.0066
Lamtor4	5	0.89542	0.89589	1	15268	0	0.88643	0.0043272	0.018187	0.397562	830	3	0.88643
Hif1an	5	0.99567	0.99565	1	17914	0	0.62092	0.0043333	0.018212	0.397649	831	5	0.62092
Nsmce1	5	0.99566	0.99564	1	17913	0	0.36774	0.0043441	0.018256	0.398134	832	5	0.36774
Ogfr	5	0.99563	0.99562	1	17912	0	0.31111	0.0043697	0.018359	0.399428	833	5	0.31111
Col2a1	5	0.49678	0.64339	1	10166	1	0.42145	0.004383	0.018418	0.399633	834	4	0.42145
Tmem196	5	0.95933	0.95953	1	16789	0	0.60212	0.0043866	0.018434	0.399633	835	3	0.60212
Cep120	5	0.99561	0.9956	1	17911	0	0.36927	0.0043886	0.018439	0.399633	836	5	0.36927
Myh15	4	0.70638	0.7248	1	12377	1	0.45685	0.0043918	0.015273	0.356844	837	2	0.45685
Cd200r3	5	0.99561	0.9956	1	17910	0	0.37927	0.0043918	0.018455	0.399633	838	5	0.37927
Tnrc6b	5	0.98793	0.98799	1	17594	0	0.56787	0.0044098	0.018521	0.400583	839	4	0.56787
Vps4b	5	0.99556	0.99556	1	17907	0	0.57055	0.0044371	0.018619	0.401779	840	5	0.57055
Setd1a	5	0.99372	0.99373	1	17824	0	0.54472	0.004457	0.018702	0.402982	841	4	0.54472
Rnf2	5	0.88935	0.88984	1	15136	0	0.65185	0.0044612	0.018719	0.402982	842	4	0.65185
Mgat4a	5	0.1415	0.28801	1	4627	1	0.40464	0.0044857	0.01883	0.404537	843	4	0.40464
Gbas	5	0.99551	0.99551	1	17905	0	0.47563	0.0044871	0.018836	0.404537	844	5	0.47563
Yod1	5	0.99551	0.99551	1	17904	0	0.22393	0.0044938	0.018865	0.404689	845	5	0.22393
Exoc3l	5	0.99549	0.99549	1	17903	0	0.37169	0.0045142	0.018944	0.405923	846	5	0.37169
4930451C15Rik	5	0.99548	0.99548	1	17902	0	0.15708	0.004522	0.018974	0.406096	847	5	0.15708
Srsf1	5	0.95729	0.95751	1	16736	0	1.013	0.0045324	0.019013	0.406452	848	3	1.013
Reep1	5	0.99546	0.99546	1	17901	0	0.29119	0.0045425	0.019056	0.406876	849	5	0.29119
Lrrc63	5	0.99543	0.99543	1	17900	0	0.42265	0.0045683	0.019154	0.407778	850	5	0.42265
Cd44	5	0.99542	0.99543	1	17898	0	0.45416	0.0045718	0.019164	0.407778	851	5	0.45416
Gm5934	1	0.99542	0.99548	1	17899	0	3.0357	0.0045776	0.0044876	0.177632	852	1	3.0357
Ushbp1	5	0.99542	0.99542	1	17897	0	0.24752	0.004583	0.019202	0.40813	853	5	0.24752
Fam92b	5	0.96699	0.96718	1	16982	0	0.35935	0.0045958	0.019272	0.409144	854	4	0.35935
Hs6st1	5	0.99531	0.99531	1	17895	0	0.34636	0.0046912	0.019673	0.416268	855	5	0.34636
Mfng	5	0.93569	0.93596	1	16189	0	0.62132	0.0046924	0.019676	0.416268	856	3	0.62132
Dtd2	5	0.94914	0.94942	1	16523	0	0.49594	0.0047152	0.019768	0.417482	857	4	0.49594
Mgat5	5	0.99528	0.99528	1	17894	0	0.22315	0.0047173	0.019779	0.417482	858	5	0.22315
Folr1	5	0.99527	0.99526	1	17893	0	0.39949	0.0047273	0.019812	0.417719	859	5	0.39949
Cntnap5a	5	0.77986	0.80297	1	13174	1	0.6282	0.004739	0.019854	0.418124	860	4	0.6282
Lats1	5	0.99525	0.99524	1	17892	0	0.33105	0.0047454	0.019879	0.418167	861	5	0.33105
Ywhaz	5	0.99524	0.99521	1	17891	0	0.48322	0.004764	0.01995	0.41917	862	5	0.48322
Cdcp1	5	0.99522	0.9952	1	17889	0	0.60303	0.0047792	0.020016	0.419346	863	5	0.60303
Lman2	5	0.94793	0.9482	1	16494	0	0.46641	0.0047859	0.020045	0.419346	864	4	0.46641
Mob2	5	0.9952	0.99519	1	17888	0	0.47009	0.0047951	0.020078	0.419346	865	5	0.47009
Nr2f2	5	0.9952	0.99519	1	17887	0	0.50791	0.0047963	0.020084	0.419346	866	5	0.50791
Dgat2	5	0.78587	0.80671	1	13257	1	0.57617	0.004801	0.020105	0.419346	867	3	0.57617
Il2rg	5	0.16726	0.32673	1	5216	1	0.37598	0.0048033	0.020117	0.419346	868	4	0.37598
Banf2	5	0.99516	0.99514	1	17885	0	0.29715	0.0048433	0.02028	0.422254	869	5	0.29715
Clpb	5	0.97738	0.97751	1	17264	0	0.3695	0.0048789	0.020424	0.424764	870	4	0.3695
Zfp277	5	0.98656	0.98664	1	17542	0	0.46917	0.0048886	0.020467	0.425178	871	4	0.46917
Smim11	3	0.99511	0.99524	1	17884	0	0.57827	0.0048925	0.013516	0.339846	872	3	0.57827
Fem1c	5	0.93057	0.93085	1	16066	0	0.53388	0.0049073	0.020533	0.426072	873	4	0.53388
Arid5b	5	0.99508	0.99507	1	17883	0	0.54133	0.004918	0.020571	0.426216	874	5	0.54133
Taf11	5	0.11339	0.24458	1	4001	1	0.62476	0.0049458	0.020679	0.427101	875	4	0.62476
Wdr52	5	0.99505	0.99504	1	17882	0	0.40033	0.0049543	0.02072	0.427101	876	5	0.40033
Abcb5	5	0.85135	0.85407	1	14339	1	0.52326	0.0049553	0.020722	0.427101	877	3	0.52326
Hgfac	5	0.82257	0.83164	1	13824	1	0.40033	0.0049715	0.020787	0.427963	878	4	0.40033
Slc24a6	5	0.99498	0.99498	1	17881	0	0.3469	0.0050199	0.020972	0.431041	879	5	0.3469
Ccdc177	5	0.99498	0.99498	1	17880	0	0.16984	0.0050219	0.020983	0.431041	880	5	0.16984
Tssk4	5	0.99497	0.99497	1	17879	0	0.28007	0.0050321	0.02102	0.431322	881	5	0.28007
Serpina9	5	0.8876	0.88808	1	15103	0	0.52407	0.0050424	0.021063	0.431724	882	4	0.52407
Cdh9	5	0.95129	0.95154	1	16585	0	0.48479	0.0050641	0.021148	0.432973	883	4	0.48479
Kbtbd8	5	0.99493	0.99492	1	17877	0	0.40589	0.0050731	0.021185	0.433262	884	5	0.40589
Anxa10	5	0.48638	0.63424	1	10009	1	0.48167	0.0050796	0.021211	0.433297	885	4	0.48167
Ccar1	5	0.99491	0.9949	1	17876	0	0.55784	0.0050944	0.021259	0.433379	886	5	0.55784
Klhl5	5	0.9949	0.9949	1	17875	0	0.34985	0.0050952	0.021262	0.433379	887	5	0.34985
Ewsr1	4	0.97435	0.97456	1	17168	0	0.57763	0.0051215	0.017716	0.390976	888	3	0.57763
Pfdn2	5	0.80721	0.82072	1	13583	1	0.61871	0.0051316	0.021408	0.435397	889	3	0.61871
Magoh	5	0.79248	0.81087	1	13346	1	0.43028	0.0051423	0.021442	0.435605	890	3	0.43028
Il21r	5	0.99485	0.99485	1	17873	0	0.41669	0.0051523	0.021489	0.435791	891	5	0.41669
Col28a1	5	0.99484	0.99485	1	17872	0	0.44878	0.0051594	0.021514	0.435791	892	5	0.44878
Comt	5	0.53913	0.6814	1	10837	2	-0.029236	0.0051616	0.021522	0.435791	893	2	-0.029236
4921524J17Rik	5	0.99483	0.99484	1	17871	0	0.57868	0.0051747	0.021569	0.436269	894	5	0.57868
Vmn1r78	5	0.88925	0.88973	1	15134	0	0.49611	0.0052001	0.021662	0.43759	895	4	0.49611
Ceacam19	5	0.5995	0.71669	1	11486	1	0.63901	0.0052055	0.021684	0.43759	896	3	0.63901
Luzp2	5	0.99478	0.99478	1	17870	0	0.34664	0.0052209	0.021746	0.43759	897	5	0.34664
Gltscr1l	5	0.798	0.81446	1	13438	1	0.58177	0.0052364	0.021801	0.43759	898	4	0.58177
Apobec1	5	0.99476	0.99476	1	17868	0	0.6285	0.0052367	0.021801	0.43759	899	5	0.6285
Irak1	5	0.6721	0.74659	1	12070	1	0.37836	0.0052389	0.021809	0.43759	900	4	0.37836
Dab2ip	5	0.98779	0.98784	1	17589	0	0.38958	0.0052424	0.021825	0.43759	901	4	0.38958
Acan	5	0.99476	0.99475	1	17867	0	0.22211	0.0052426	0.021825	0.43759	902	5	0.22211
Smpd3	5	0.99474	0.99473	1	17865	0	0.53557	0.005261	0.021896	0.438536	903	5	0.53557
Vezf1	5	0.9917	0.99177	1	17740	0	0.64498	0.0052733	0.021953	0.439175	904	4	0.64498
Btbd10	5	0.78478	0.80606	1	13244	1	0.39813	0.005281	0.021975	0.439175	905	3	0.39813
Sox21	5	0.99471	0.99471	1	17864	0	0.34184	0.0052888	0.022	0.439193	906	5	0.34184
E2f4	5	0.97078	0.9709	1	17076	0	0.54731	0.0053044	0.022058	0.439875	907	4	0.54731
Ccdc71l	5	0.77758	0.80158	1	13142	1	0.43047	0.005317	0.022114	0.440503	908	4	0.43047
Rtel1	5	0.67601	0.74839	1	12096	1	0.16234	0.0053326	0.022189	0.441316	909	2	0.16234
Atp6v0b	5	0.53197	0.6749	1	10720	1	1.2245	0.0053477	0.022249	0.441316	910	3	1.2245
Numb	5	0.98905	0.98913	1	17641	0	0.47428	0.005349	0.022255	0.441316	911	4	0.47428
Kcnq3	5	0.99255	0.99262	1	17769	0	0.48175	0.0053594	0.022303	0.441316	912	4	0.48175
Prkch	5	0.76123	0.79178	1	12940	1	0.47632	0.0053618	0.022313	0.441316	913	4	0.47632
Ccdc86	5	0.99463	0.99464	1	17863	0	0.34046	0.0053677	0.022334	0.441316	914	5	0.34046
Dip2c	5	0.91285	0.91319	1	15657	0	-0.034023	0.005372	0.022347	0.441316	915	2	-0.034023
Agpat6	5	0.88204	0.8825	1	14976	0	0.38771	0.0053788	0.02237	0.441316	916	4	0.38771
Wdr43	4	0.9946	0.99462	1	17862	0	1.1114	0.0054008	0.01862	0.401779	917	4	1.1114
Impdh2	5	0.99457	0.99458	1	17861	0	0.24943	0.0054264	0.022559	0.444553	918	5	0.24943
Ssb	5	0.92779	0.9281	1	16006	0	1.039	0.0054391	0.022608	0.444809	919	4	1.039
Rpl14	5	0.65037	0.73715	1	11887	1	0.3415	0.0054438	0.02262	0.444809	920	2	0.3415
Slc34a2	5	0.54686	0.6884	1	10962	1	0.59808	0.0054616	0.02268	0.445518	921	3	0.59808
Dkk1	5	0.99449	0.9945	1	17859	0	0.21449	0.0055083	0.022873	0.448054	922	5	0.21449
Tnip2	5	0.54054	0.68269	1	10864	1	0.35084	0.0055111	0.022881	0.448054	923	3	0.35084
Lrrc56	5	0.99077	0.99084	1	17710	0	0.43095	0.0055147	0.022889	0.448054	924	4	0.43095
Fzd3	5	0.91313	0.91347	1	15662	0	0.63303	0.0055202	0.022907	0.448054	925	4	0.63303
Vmn2r10	5	0.55253	0.69359	1	11056	1	0.38131	0.0055386	0.022987	0.448497	926	3	0.38131
BC049715	5	0.99446	0.99447	1	17858	0	0.30946	0.0055419	0.023002	0.448497	927	5	0.30946
Hddc3	5	0.55893	0.69944	1	11154	1	0.4656	0.005542	0.023002	0.448497	928	4	0.4656
Mllt1	5	0.95877	0.95898	1	16775	0	0.44876	0.0055666	0.023103	0.449982	929	3	0.44876
Gm4906	4	0.99439	0.9944	1	17856	0	0.39415	0.0056105	0.019318	0.409642	930	4	0.39415
Cbx3	2	0.99439	0.99438	1	17855	0	0.88872	0.0056136	0.010872	0.299557	931	2	0.88872
Ddx27	5	0.966	0.96618	1	16948	0	0.87195	0.0056928	0.023491	0.456004	932	4	0.87195
Ckap5	5	0.71485	0.76691	1	12468	1	0.87195	0.0056928	0.023491	0.456004	933	4	0.87195
Ddx5	5	0.91276	0.9131	1	15655	0	0.55668	0.0056998	0.023511	0.456004	934	4	0.55668
Wdr86	5	0.63845	0.73219	1	11785	1	0.54645	0.0057614	0.023693	0.458553	935	4	0.54645
Tubgcp2	5	0.9727	0.9728	1	17134	0	0.73886	0.0057688	0.023724	0.458675	936	4	0.73886
DXBay18	4	0.99419	0.99422	1	17847	0	0.48084	0.0058125	0.019973	0.419178	937	4	0.48084
Vma21	5	0.79673	0.81363	1	13420	1	0.86621	0.005815	0.023873	0.460216	938	4	0.86621
Ano9	5	0.6824	0.75135	1	12147	1	-0.0087963	0.0058251	0.023904	0.460216	939	2	-0.0087963
Rnf32	5	0.77495	0.79997	1	13109	1	0.51254	0.005833	0.023928	0.460216	940	4	0.51254
Cltc	5	0.9143	0.91462	1	15695	0	0.55213	0.0058524	0.023986	0.460216	941	4	0.55213
Zfyve16	5	0.95288	0.95313	1	16630	0	0.61242	0.0058583	0.024	0.460216	942	4	0.61242
Fam175b	5	0.95001	0.95025	1	16546	0	0.48905	0.0058593	0.024003	0.460216	943	3	0.48905
Uhrf1bp1l	5	0.72099	0.76999	1	12532	1	0.36343	0.0058888	0.024106	0.461373	944	4	0.36343
Pdp2	5	0.7785	0.80215	1	13151	1	0.47445	0.0058979	0.024136	0.461373	945	4	0.47445
Slc35b1	5	0.59406	0.71455	1	11443	1	0.24882	0.0058998	0.024139	0.461373	946	3	0.24882
Ntn5	5	0.091127	0.20934	1	3514	2	0.30769	0.0059178	0.024194	0.46186	947	3	0.30769
Nagpa	5	0.91479	0.9151	1	15707	0	0.51203	0.005928	0.024224	0.46186	948	3	0.51203
Smtn	5	0.8253	0.83358	1	13868	1	0.01743	0.0059384	0.024252	0.46186	949	1	0.01743
Cldn26	5	0.94475	0.945	1	16402	0	0.5215	0.0059431	0.024265	0.46186	950	3	0.5215
Vmn1r27	3	0.85204	0.85205	1	14344	0	0.27296	0.0059575	0.016334	0.37163	951	1	0.27296
Mylk2	5	0.64094	0.73322	1	11804	1	0.36025	0.005958	0.024308	0.462212	952	4	0.36025
Timm44	5	0.79234	0.81077	1	13343	1	0.62372	0.00598	0.024372	0.46282	953	4	0.62372
Shcbp1	5	0.84541	0.84915	1	14212	1	0.23968	0.0059852	0.024391	0.46282	954	3	0.23968
Aph1b	5	0.60524	0.71888	1	11531	1	0.37791	0.006004	0.024436	0.46321	955	4	0.37791
Lpin1	5	0.69999	0.75959	1	12315	1	0.51494	0.0060539	0.024595	0.465729	956	3	0.51494
Rragc	5	0.97063	0.97075	1	17074	0	0.82931	0.0061158	0.024774	0.468228	957	3	0.82931
Atp6v1e1	5	0.76178	0.79212	1	12948	1	0.39828	0.0061169	0.024777	0.468228	958	4	0.39828
Derl1	5	0.93862	0.93886	1	16252	0	0.9303	0.0061351	0.024836	0.468855	959	3	0.9303
Csrnp2	5	0.95261	0.95285	1	16620	0	0.48787	0.0062058	0.025037	0.471608	960	4	0.48787
Babam1	5	0.97631	0.97646	1	17222	0	0.45155	0.0062151	0.025059	0.471608	961	4	0.45155
Ccdc150	4	0.99378	0.9938	1	17828	0	0.39273	0.0062166	0.021332	0.434335	962	4	0.39273
Tnfaip8l3	5	0.38872	0.54929	1	8573	1	0.69838	0.0062392	0.025123	0.47234	963	3	0.69838
Cnep1r1	5	0.83323	0.83961	1	14015	1	0.51647	0.0062531	0.025164	0.472626	964	2	0.51647
Atp6v1a	5	0.96326	0.96347	1	16888	0	0.22458	0.0062743	0.025218	0.472671	965	3	0.22458
Defa21	2	0.99369	0.99369	1	17823	0	0.94521	0.0063108	0.012142	0.319257	966	2	0.94521
Rps6ka3	5	0.83379	0.84005	1	14025	1	0.72513	0.0063646	0.025495	0.47668	967	4	0.72513
Rhoj	5	0.91685	0.91715	1	15755	0	0.55198	0.0063703	0.02551	0.47668	968	4	0.55198
Gramd1c	5	0.83419	0.84036	1	14034	1	0.44176	0.0063858	0.025553	0.477	969	4	0.44176
Sept11	5	0.73896	0.7793	1	12703	1	0.60175	0.0064189	0.025642	0.477031	970	4	0.60175
Antxr1	5	0.97999	0.98013	1	17339	0	0.51579	0.006424	0.025656	0.477031	971	3	0.51579
Supt4a	5	0.83652	0.84218	1	14072	1	0.46144	0.0064245	0.025657	0.477031	972	4	0.46144
Mmp12	5	0.74603	0.78319	1	12784	1	0.52125	0.006428	0.025668	0.477031	973	3	0.52125
Ankrd46	5	0.98862	0.98867	1	17622	0	0.87798	0.0064347	0.025684	0.477031	974	3	0.87798
Ido2	5	0.97999	0.98013	1	17340	0	0.50441	0.0064461	0.025719	0.477204	975	3	0.50441
Stt3b	5	0.90909	0.90946	1	15564	0	0.42872	0.0064996	0.025888	0.479859	976	4	0.42872
Proz	4	0.71551	0.73129	1	12473	1	0.56022	0.0065267	0.022325	0.441316	977	3	0.56022
Enox2	5	0.95582	0.95608	1	16692	0	0.54319	0.0065397	0.02601	0.480838	978	4	0.54319
Ppp1r14a	5	0.98027	0.98041	1	17350	0	0.1486	0.0065536	0.026053	0.480838	979	2	0.1486
Cd207	5	0.60818	0.71999	1	11553	1	0.45141	0.0065577	0.026069	0.480838	980	4	0.45141
Uncx	5	0.46834	0.61831	1	9731	1	0.48093	0.0065581	0.026072	0.480838	981	4	0.48093
Robo2	5	0.8952	0.89566	1	15266	0	0.43691	0.0065655	0.026099	0.480852	982	4	0.43691
Sept1	5	0.9025	0.90288	1	15426	0	0.48701	0.0065796	0.026133	0.480995	983	4	0.48701
Traip	5	0.41135	0.56894	1	8915	2	0.31011	0.0066079	0.026215	0.481736	984	3	0.31011
Rybp	5	0.81397	0.8255	1	13690	1	0.53892	0.006629	0.026272	0.481736	985	4	0.53892
Napa	5	0.3545	0.52004	1	8115	1	0.11811	0.0066352	0.026289	0.481736	986	2	0.11811
Prl7c1	5	0.86213	0.8634	1	14563	1	0.33641	0.0066516	0.026334	0.481736	987	3	0.33641
Rrp15	5	0.95587	0.95614	1	16695	0	0.7358	0.0066517	0.026334	0.481736	988	4	0.7358
Atp6v1f	5	0.9032	0.90358	1	15436	0	0.88059	0.0066527	0.026338	0.481736	989	4	0.88059
Plekhd1	5	0.95843	0.95864	1	16766	0	0.38431	0.0066674	0.026386	0.481736	990	4	0.38431
Micall1	5	0.8325	0.83906	1	14000	1	0.67518	0.0066829	0.026429	0.481736	991	4	0.67518
Clip3	5	0.66339	0.74276	1	11996	1	0.39881	0.0066859	0.026436	0.481736	992	4	0.39881
Zbtb33	5	0.95776	0.95798	1	16748	0	0.43094	0.0066887	0.026444	0.481736	993	4	0.43094
Fubp1	5	0.89278	0.89322	1	15214	0	0.53469	0.0066937	0.026461	0.481736	994	4	0.53469
Hist1h3g	2	0.9933	0.99329	1	17803	0	1.0404	0.0067039	0.012865	0.329342	995	2	1.0404
2610018G03Rik	5	0.91722	0.91754	1	15764	0	0.60691	0.006728	0.026548	0.482844	996	4	0.60691
Anapc1	5	0.92217	0.92249	1	15878	0	0.1602	0.0067668	0.026656	0.484332	997	2	0.1602
Smarce1	2	0.99318	0.99317	1	17798	0	0.74972	0.0068197	0.013077	0.33308	998	2	0.74972
Hsd17b12	5	0.75634	0.78892	1	12890	1	0.31879	0.0068441	0.026886	0.487346	999	3	0.31879
Zfp507	5	0.53537	0.67797	1	10772	1	0.66755	0.0068493	0.026901	0.487346	1000	4	0.66755
Tnnt1	5	0.95694	0.95717	1	16724	0	0.42462	0.0068706	0.026968	0.488074	1001	3	0.42462
Zmiz1	5	0.97163	0.97175	1	17102	0	0.6901	0.0069227	0.027115	0.489537	1002	3	0.6901
Tppp3	5	0.99333	0.99336	1	17805	0	0.38642	0.0069358	0.027149	0.489537	1003	4	0.38642
Fam24a	5	0.93847	0.93871	1	16250	0	0.57478	0.0069393	0.027155	0.489537	1004	3	0.57478
Il1rap	5	0.75173	0.78635	1	12844	1	0.46674	0.0070254	0.027408	0.492647	1005	3	0.46674
Rassf10	5	0.98953	0.98961	1	17657	0	0.52582	0.0070255	0.027408	0.492647	1006	4	0.52582
V1rd19	5	0.69499	0.75721	1	12271	1	0.57102	0.0070744	0.027542	0.494008	1007	4	0.57102
Slc10a4	5	0.99418	0.9942	1	17846	0	0.3527	0.0070803	0.027568	0.494008	1008	4	0.3527
2410016O06Rik	5	0.89218	0.89263	1	15200	0	0.54532	0.0070952	0.027609	0.494008	1009	4	0.54532
Zfc3h1	5	0.94226	0.94249	1	16349	0	0.57397	0.0071122	0.027653	0.494008	1010	4	0.57397
Nfib	5	0.89201	0.89245	1	15190	0	0.59235	0.0071146	0.027662	0.494008	1011	3	0.59235
Stk3	5	0.40752	0.56565	1	8856	2	-0.16466	0.007118	0.027672	0.494008	1012	2	-0.16466
Wnt2	5	0.98316	0.98325	1	17435	0	0.50173	0.0071364	0.027722	0.494431	1013	4	0.50173
Klf3	5	0.99164	0.99172	1	17738	0	0.55493	0.0071699	0.027809	0.494786	1014	4	0.55493
Gpr56	5	0.78517	0.80628	1	13248	1	0.44499	0.0071759	0.027823	0.494786	1015	4	0.44499
Tnpo3	5	0.4093	0.5672	1	8878	1	0.63762	0.0071972	0.027885	0.495408	1016	3	0.63762
Ssxb10	2	0.99278	0.99277	1	17783	0	0.77895	0.0072167	0.013776	0.343576	1017	2	0.77895
Cdc6	5	0.20907	0.38742	1	6059	1	0.33731	0.0072369	0.027986	0.495738	1018	3	0.33731
Plat	5	0.88453	0.88502	1	15018	0	0.53103	0.0072484	0.028015	0.495738	1019	3	0.53103
Abcb10	5	0.96992	0.97002	1	17055	0	0.49523	0.0072533	0.028028	0.495738	1020	4	0.49523
Haus8	5	0.78575	0.80663	1	13254	1	0.48794	0.0072711	0.028081	0.495738	1021	3	0.48794
Tsen34	5	0.13975	0.28528	1	4585	3	-0.30978	0.0072728	0.028085	0.495738	1022	2	-0.30978
Rps5	5	0.44367	0.59681	1	9386	1	0.69215	0.0072753	0.028092	0.495738	1023	3	0.69215
Zfp646	5	0.98466	0.98477	1	17484	0	0.58373	0.0073541	0.028321	0.498462	1024	3	0.58373
Mrgprb3	5	0.93301	0.93327	1	16115	0	0.074651	0.0073561	0.028326	0.498462	1025	2	0.074651
Slc52a3	5	0.97773	0.97787	1	17276	0	0.61731	0.0073566	0.028327	0.498462	1026	3	0.61731
Ppp3cc	4	0.99263	0.99264	1	17776	0	0.32903	0.0073668	0.025042	0.471608	1027	4	0.32903
Pfdn1	5	0.81044	0.82296	1	13626	1	0.67765	0.0073881	0.028422	0.499173	1028	4	0.67765
Nol11	5	0.87562	0.87618	1	14837	1	0.78537	0.0073883	0.028422	0.499173	1029	3	0.78537
Yipf5	5	0.79601	0.81315	1	13400	1	0.48106	0.0073996	0.028455	0.499241	1030	4	0.48106
Ankrd17	5	0.85083	0.85364	1	14328	1	0.58209	0.0074084	0.02848	0.499241	1031	4	0.58209
2510002D24Rik	5	0.98438	0.98449	1	17471	0	0.60903	0.0075232	0.028823	0.504598	1032	3	0.60903
Dcp2	5	0.38064	0.54238	1	8462	1	0.13387	0.0075296	0.02884	0.504598	1033	2	0.13387
Tmem9b	5	0.90228	0.90266	1	15419	0	0.49973	0.0075772	0.028978	0.506525	1034	3	0.49973
Hs6st3	5	0.80601	0.81986	1	13564	1	0.17171	0.0076061	0.029058	0.506973	1035	3	0.17171
Kng1	5	0.47985	0.62845	1	9908	1	0.69431	0.0076074	0.029059	0.506973	1036	3	0.69431
2024-03-03	5	0.66162	0.74197	1	11973	1	0.44659	0.007619	0.029087	0.50699	1037	4	0.44659
Arhgap31	5	0.85556	0.85763	1	14443	1	0.47678	0.007639	0.029148	0.507182	1038	4	0.47678
Nsun7	5	0.90067	0.90105	1	15388	0	-0.0079678	0.00764	0.029153	0.507182	1039	2	-0.0079678
Rrad	5	0.85343	0.85582	1	14382	1	0.81505	0.0076504	0.029183	0.507218	1040	3	0.81505
Cib4	5	0.97236	0.97247	1	17123	0	0.36038	0.0076755	0.029257	0.507643	1041	4	0.36038
Epyc	5	0.56591	0.70428	1	11245	1	0.41175	0.0076771	0.029263	0.507643	1042	4	0.41175
BC031181	4	0.86597	0.86602	1	14635	0	0.3871	0.0076909	0.026021	0.480838	1043	3	0.3871
Gm5132	2	0.99228	0.99227	1	17758	0	1.0628	0.0077239	0.014707	0.354304	1044	2	1.0628
Omg	5	0.7726	0.79853	1	13078	1	0.23576	0.0077571	0.029506	0.510087	1045	3	0.23576
Clec16a	5	0.6896	0.75467	1	12219	1	0.5678	0.0077585	0.029509	0.510087	1046	4	0.5678
Trpm4	5	0.95352	0.95377	1	16644	0	0.38647	0.0077601	0.029514	0.510087	1047	4	0.38647
Tmx2	5	0.95915	0.95934	1	16785	0	0.17427	0.0077728	0.029547	0.510152	1048	2	0.17427
Ldhd	5	0.8167	0.82748	1	13728	1	0.38095	0.0077832	0.029574	0.510152	1049	4	0.38095
BC030476	5	0.44479	0.59782	1	9402	1	0.6479	0.007802	0.029637	0.510766	1050	3	0.6479
Cntnap4	5	0.97992	0.98006	1	17336	0	0.46811	0.007815	0.02967	0.510766	1051	4	0.46811
Ercc4	5	0.89379	0.89425	1	15234	0	0.49449	0.0078225	0.029692	0.510766	1052	4	0.49449
Cxx1c	5	0.56893	0.70537	1	11269	1	0.39785	0.007863	0.0298	0.512051	1053	4	0.39785
Trove2	5	0.98138	0.98153	1	17383	0	0.39068	0.007869	0.029824	0.512051	1054	3	0.39068
Uvssa	5	0.92593	0.92624	1	15957	0	0.50339	0.0078778	0.029851	0.512051	1055	4	0.50339
Timeless	5	0.88561	0.8861	1	15051	0	0.39129	0.0079249	0.030003	0.513338	1056	4	0.39129
Atp2a1	5	0.93137	0.93166	1	16084	0	0.36642	0.0079253	0.030004	0.513338	1057	4	0.36642
Dexi	5	0.99022	0.99028	1	17690	0	0.44794	0.0079273	0.030009	0.513338	1058	4	0.44794
Zmym5	4	0.65429	0.69052	1	11913	1	0.58158	0.0079354	0.026798	0.486442	1059	2	0.58158
Isyna1	5	0.78514	0.80627	1	13246	1	0.57471	0.0079476	0.030071	0.513561	1060	4	0.57471
Fnbp1	5	0.90407	0.90446	1	15458	0	0.57254	0.0079515	0.030078	0.513561	1061	3	0.57254
Kctd13	5	0.97998	0.98012	1	17337	0	0.38626	0.008013	0.030244	0.515911	1062	4	0.38626
Rpl12	2	0.57635	0.57637	1	11321	0	1.5624	0.0080212	0.015244	0.356844	1063	1	1.5624
Dmd	5	0.91779	0.91809	1	15777	0	0.26676	0.0080444	0.030336	0.516384	1064	3	0.26676
Pcna	4	0.76657	0.77083	1	13008	1	1.2062	0.0080465	0.027148	0.489537	1065	3	1.2062
Ppm1k	5	0.41775	0.57436	1	9017	2	-0.030816	0.0080505	0.030356	0.516384	1066	2	-0.030816
Tmem40	9	0.9854	0.98568	1	17508	0	0.21549	0.0080772	0.038987	0.58742	1067	7	0.21549
Brcc3	5	0.77028	0.79712	1	13054	1	0.61361	0.0081132	0.030532	0.518906	1068	3	0.61361
Iqcb1	5	0.98748	0.98753	1	17581	0	0.50625	0.0081479	0.03064	0.519925	1069	4	0.50625
Fam96a	5	0.54803	0.68947	1	10983	1	0.069629	0.0081615	0.030677	0.519925	1070	2	0.069629
Il33	4	0.89998	0.90005	1	15369	0	0.48216	0.0081693	0.027531	0.494008	1071	3	0.48216
Kcnq1	5	0.78263	0.8047	1	13208	1	0.027653	0.0082336	0.030897	0.522517	1072	2	0.027653
Abat	4	0.99176	0.99177	1	17744	0	0.37236	0.0082439	0.027756	0.494565	1073	4	0.37236
Pex11g	5	0.40074	0.55974	1	8737	2	0.25631	0.0082578	0.030962	0.522517	1074	3	0.25631
Tpmt	5	0.94597	0.94622	1	16434	0	0.4873	0.0082594	0.030966	0.522517	1075	4	0.4873
Thap1	5	0.9474	0.94764	1	16474	0	0.65882	0.0082639	0.030975	0.522517	1076	4	0.65882
Fhl1	5	0.9873	0.98734	1	17572	0	0.42241	0.0082825	0.031034	0.52261	1077	4	0.42241
Xylt2	5	0.85234	0.85488	1	14350	1	0.48526	0.0082985	0.03108	0.522911	1078	3	0.48526
Brd9	5	0.79542	0.81276	1	13387	1	0.59197	0.0083063	0.03111	0.52294	1079	3	0.59197
Svop	4	0.9821	0.98219	1	17403	0	0.4497	0.0083392	0.028058	0.495738	1080	3	0.4497
9130401M01Rik	5	0.9871	0.98715	1	17564	0	1.1068	0.0083532	0.031252	0.524838	1081	4	1.1068
Ube3b	5	0.31547	0.48712	1	7594	1	0.45755	0.0084351	0.031486	0.527884	1082	4	0.45755
Chmp6	5	0.9144	0.91472	1	15698	0	1.2691	0.0084616	0.031569	0.527884	1083	4	1.2691
Cd40lg	5	0.53416	0.67687	1	10753	2	-0.11902	0.0084669	0.031581	0.527884	1084	2	-0.11902
Snrnp27	5	0.44938	0.6018	1	9468	1	0.51421	0.0084669	0.031581	0.527884	1085	3	0.51421
Tmem91	5	0.9423	0.94253	1	16350	0	0.37896	0.0084772	0.031605	0.527884	1086	4	0.37896
Tmem229a	5	0.97127	0.97139	1	17089	0	0.59913	0.0084916	0.031647	0.528096	1087	4	0.59913
Ccl7	5	0.97709	0.97723	1	17250	0	0.46077	0.0085198	0.031726	0.528945	1088	3	0.46077
Zc3hav1	5	0.98267	0.98276	1	17421	0	0.55043	0.0086139	0.032028	0.53252	1089	4	0.55043
Cog6	5	0.87513	0.8757	1	14821	1	0.79123	0.0086371	0.032096	0.533175	1090	3	0.79123
Appbp2	5	0.94684	0.94709	1	16461	0	0.38671	0.0086605	0.032148	0.533322	1091	4	0.38671
Il4i1	5	0.72134	0.77017	1	12536	1	0.50529	0.0086768	0.032193	0.533322	1092	4	0.50529
Hdac9	5	0.34928	0.51565	1	8033	1	0.48122	0.0086822	0.032207	0.533322	1093	3	0.48122
Afap1	5	0.82311	0.83201	1	13831	1	0.43099	0.0086871	0.032221	0.533322	1094	4	0.43099
Nus1	5	0.68885	0.75433	1	12210	1	0.38944	0.0087476	0.032391	0.535467	1095	4	0.38944
D19Bwg1357e	5	0.93135	0.93163	1	16083	0	0.52624	0.0087545	0.032408	0.535467	1096	3	0.52624
Emc3	5	0.60657	0.71937	1	11540	1	0.72294	0.0087826	0.032471	0.536025	1097	4	0.72294
Tmed10	5	0.77047	0.79723	1	13055	1	0.44806	0.0088417	0.032645	0.537607	1098	4	0.44806
Chodl	5	0.99376	0.99377	1	17826	0	0.54091	0.0088431	0.032647	0.537607	1099	4	0.54091
Cdon	5	0.9701	0.97021	1	17061	0	0.86297	0.0088476	0.032655	0.537607	1100	4	0.86297
Spag11a	3	0.99114	0.99125	1	17722	0	0.72059	0.008861	0.02387	0.460216	1101	3	0.72059
Slc7a6os	5	0.9919	0.99197	1	17750	0	0.83708	0.0088719	0.032726	0.538294	1102	4	0.83708
Med21	5	0.95087	0.95112	1	16570	0	0.55095	0.0089244	0.032863	0.540068	1103	4	0.55095
Gsg1l	5	0.28356	0.4605	1	7188	1	0.33288	0.0089446	0.032929	0.540664	1104	4	0.33288
Nrip3	5	0.91918	0.91951	1	15810	0	0.45296	0.009009	0.033102	0.542866	1105	4	0.45296
Rps6ka6	5	0.40328	0.56195	1	8792	1	0.52551	0.009015	0.033122	0.542866	1106	3	0.52551
Zbtb11	5	0.73821	0.77891	1	12693	1	0.72111	0.0090347	0.033178	0.543221	1107	3	0.72111
1110004E09Rik	5	0.41374	0.57093	1	8955	1	0.60512	0.0090426	0.033202	0.543221	1108	3	0.60512
Atxn1l	5	0.97861	0.97874	1	17298	0	0.41705	0.0090932	0.033334	0.544401	1109	3	0.41705
Celf1	5	0.062617	0.16285	1	2941	3	-0.60627	0.0091051	0.033371	0.544533	1110	1	-0.60627
Il4ra	5	0.94089	0.94114	1	16309	0	0.37229	0.0091208	0.033419	0.544831	1111	4	0.37229
Twistnb	5	0.79456	0.81222	1	13371	1	0.57898	0.0091556	0.033518	0.545377	1112	4	0.57898
Sap25	5	0.50417	0.65005	1	10276	1	0.51809	0.0091815	0.033594	0.545377	1113	4	0.51809
Cyld	5	0.78207	0.80434	1	13199	1	0.49133	0.00919	0.033612	0.545377	1114	4	0.49133
Tnfaip2	5	0.99192	0.99199	1	17751	0	0.28814	0.0092004	0.033644	0.545377	1115	4	0.28814
Tmem251	5	0.32719	0.49697	1	7752	1	0.64839	0.0092028	0.033651	0.545377	1116	4	0.64839
Gdf1	5	0.91536	0.91564	1	15721	0	0.35522	0.0092112	0.033683	0.545377	1117	4	0.35522
Emx1	5	0.46185	0.61269	1	9646	1	0.27537	0.009213	0.03369	0.545377	1118	4	0.27537
D230025D16Rik	5	0.90544	0.90582	1	15480	0	0.51198	0.009227	0.033731	0.545559	1119	3	0.51198
Ndufa4	4	0.50256	0.60852	1	10248	1	0.53283	0.0092357	0.031	0.522517	1120	3	0.53283
Zfp1	5	0.57015	0.70578	1	11281	1	0.60369	0.0092456	0.033785	0.545954	1121	4	0.60369
Klk1b16	5	0.84727	0.85065	1	14255	1	0.40922	0.0092868	0.033905	0.547425	1122	4	0.40922
Phkg2	5	0.96846	0.96863	1	17019	0	0.075262	0.0092967	0.033936	0.54744	1123	2	0.075262
Adam10	5	0.98551	0.98562	1	17515	0	0.58183	0.0093415	0.034076	0.549215	1124	4	0.58183
Slc22a18	5	0.77731	0.80141	1	13139	1	0.52369	0.009382	0.034182	0.550271	1125	4	0.52369
Max	4	0.65783	0.69276	1	11938	1	0.69681	0.0094259	0.03159	0.527884	1126	3	0.69681
Cd46	5	0.21623	0.39741	1	6199	3	-0.19155	0.0094935	0.034542	0.555264	1127	2	-0.19155
Lrrc8c	5	0.88395	0.88444	1	15003	0	0.31059	0.0095403	0.034668	0.55635	1128	4	0.31059
Ier3ip1	5	0.82812	0.83572	1	13915	1	0.80045	0.0095422	0.03467	0.55635	1129	4	0.80045
Art1	5	0.50849	0.65387	1	10349	1	0.29323	0.0095827	0.034794	0.557364	1130	4	0.29323
1700088E04Rik	5	0.82029	0.82999	1	13783	1	0.53632	0.0095959	0.034836	0.557496	1131	3	0.53632
Kcnj4	5	0.49653	0.64319	1	10159	2	0.21527	0.0096059	0.034862	0.557496	1132	3	0.21527
Vmn1r121	1	0.99034	0.99037	1	17693	0	1.5896	0.0096639	0.0095903	0.280468	1133	1	1.5896
Rint1	5	0.6575	0.74019	1	11937	1	0.47014	0.0096837	0.035085	0.56023	1134	3	0.47014
Gzf1	5	0.28112	0.45845	1	7154	1	0.50827	0.0096866	0.035094	0.56023	1135	3	0.50827
Plvap	5	0.97247	0.97258	1	17131	0	0.52495	0.0096978	0.035129	0.560294	1136	4	0.52495
Ppm1f	5	0.99295	0.99299	1	17790	0	0.40808	0.009723	0.035203	0.560732	1137	4	0.40808
Ccdc53	5	0.75499	0.78818	1	12873	1	0.60023	0.0097351	0.035244	0.560732	1138	3	0.60023
Fubp3	5	0.80336	0.81805	1	13525	1	0.15016	0.0097361	0.035248	0.560732	1139	2	0.15016
Mtmr7	5	0.82741	0.83517	1	13903	1	-0.11911	0.0098147	0.035467	0.562946	1140	2	-0.11911
Coro1c	5	0.98271	0.9828	1	17424	0	0.32971	0.0098194	0.035482	0.562946	1141	4	0.32971
Slc4a4	5	0.96296	0.96317	1	16880	0	0.4069	0.0098578	0.035596	0.562946	1142	3	0.4069
Eif2b5	5	0.95555	0.95582	1	16685	0	0.70239	0.0098637	0.035604	0.562946	1143	4	0.70239
Tlk2	5	0.9839	0.98401	1	17455	0	0.40664	0.0098835	0.035676	0.562946	1144	4	0.40664
Crlf3	5	0.93331	0.93356	1	16126	0	0.72355	0.0098904	0.035696	0.562946	1145	3	0.72355
Col14a1	5	0.9816	0.98173	1	17389	0	0.44595	0.0098911	0.035697	0.562946	1146	4	0.44595
Il27	5	0.74888	0.78478	1	12811	1	0.38597	0.0098967	0.035719	0.562946	1147	4	0.38597
Rfc5	5	0.34391	0.51112	1	7969	1	0.33556	0.0099094	0.035741	0.562946	1148	3	0.33556
Rnaseh1	5	0.93406	0.93432	1	16148	0	0.11236	0.0099094	0.035741	0.562946	1149	2	0.11236
Ldb1	5	0.88485	0.88533	1	15028	0	0.53816	0.0099132	0.035754	0.562946	1150	3	0.53816
Mrto4	4	0.92631	0.92652	1	15966	0	0.88846	0.009966	0.033278	0.54397	1151	3	0.88846
Cplx4	5	0.48171	0.63009	1	9940	1	0.5615	0.0099783	0.035926	0.564638	1152	4	0.5615
Gm7157	5	0.98814	0.98818	1	17608	0	0.59237	0.0099889	0.035965	0.564638	1153	4	0.59237
Tra2a	5	0.87782	0.87831	1	14881	1	0.36866	0.0099992	0.035994	0.564638	1154	4	0.36866
Fgfrl1	4	0.98998	0.98996	1	17679	0	0.35259	0.010021	0.033458	0.544988	1155	4	0.35259
Ifitm6	5	0.93302	0.93328	1	16116	0	0.48427	0.010022	0.036057	0.564638	1156	4	0.48427
Sys1	5	0.99324	0.99327	1	17801	0	0.47504	0.010024	0.036062	0.564638	1157	4	0.47504
Emb	5	0.31265	0.48478	1	7558	1	0.50673	0.010031	0.036076	0.564638	1158	3	0.50673
Adnp	5	0.50985	0.65507	1	10368	1	0.72581	0.010052	0.036131	0.565025	1159	3	0.72581
Pgpep1	5	0.82994	0.83707	1	13962	1	0.33635	0.010108	0.036299	0.566676	1160	4	0.33635
C330007P06Rik	5	0.78714	0.8075	1	13271	1	0.34558	0.010145	0.036403	0.567345	1161	3	0.34558
Pigw	5	0.92017	0.92051	1	15837	0	0.6857	0.010157	0.036442	0.567477	1162	4	0.6857
Comp	5	0.96668	0.96687	1	16970	0	0.39586	0.010265	0.036775	0.571745	1163	4	0.39586
Rbbp7	5	0.98645	0.98653	1	17538	0	0.64028	0.010268	0.036779	0.571745	1164	4	0.64028
Cdc7	5	0.85475	0.85694	1	14418	1	0.63911	0.010284	0.036824	0.571964	1165	4	0.63911
Hdgfl1	5	0.97616	0.97633	1	17219	0	0.69866	0.010311	0.036892	0.572542	1166	4	0.69866
Mc1r	5	0.98341	0.98351	1	17444	0	0.33288	0.010329	0.036944	0.57286	1167	4	0.33288
Numbl	5	0.79914	0.81523	1	13455	1	0.39075	0.010346	0.036995	0.57317	1168	4	0.39075
Sfrp5	5	0.38936	0.54983	1	8587	2	0.54446	0.01037	0.037064	0.573388	1169	3	0.54446
Bag3	5	0.63756	0.73182	1	11780	1	0.40864	0.010373	0.037071	0.573388	1170	3	0.40864
Pigx	5	0.99354	0.99355	1	17815	0	0.58787	0.010406	0.037166	0.573921	1171	4	0.58787
Adarb2	5	0.96178	0.96198	1	16849	0	0.32553	0.010407	0.037168	0.573921	1172	4	0.32553
Klhdc7b	5	0.98849	0.98854	1	17619	0	0.32739	0.01043	0.037233	0.574436	1173	4	0.32739
Ak2	5	0.96027	0.96045	1	16810	0	0.75677	0.010462	0.037325	0.574908	1174	4	0.75677
Lca5l	5	0.90725	0.90763	1	15514	0	0.35944	0.010474	0.037364	0.575015	1175	4	0.35944
Slirp	5	0.92431	0.92465	1	15924	0	0.39646	0.010529	0.037532	0.577124	1176	4	0.39646
Med28	5	0.95696	0.95719	1	16726	0	0.84048	0.010583	0.037685	0.578989	1177	3	0.84048
Klhdc8a	5	0.63294	0.72989	1	11734	1	0.29369	0.010654	0.03788	0.581011	1178	4	0.29369
Fam83c	5	0.98931	0.98939	1	17652	0	0.47148	0.010679	0.037943	0.581213	1179	4	0.47148
Cenpa	5	0.54259	0.68453	1	10890	1	-0.12775	0.010705	0.038009	0.581213	1180	2	-0.12775
Utp6	5	0.93559	0.93586	1	16185	0	0.26544	0.010718	0.038047	0.581213	1181	3	0.26544
Timm17a	5	0.83708	0.84259	1	14080	1	0.60946	0.01072	0.038051	0.581213	1182	4	0.60946
Zdhhc8	5	0.64105	0.73326	1	11807	1	0.35622	0.010739	0.038103	0.581527	1183	3	0.35622
Ufsp2	5	0.99244	0.99251	1	17762	0	0.38216	0.01077	0.038187	0.582325	1184	4	0.38216
Cdc42se2	5	0.90926	0.90964	1	15571	0	0.14672	0.0108	0.03828	0.58288	1185	2	0.14672
Maml2	5	0.76046	0.79133	1	12927	1	0.58425	0.010804	0.038291	0.58288	1186	3	0.58425
Zmynd11	5	0.99182	0.99188	1	17747	0	0.47347	0.010837	0.03838	0.58288	1187	4	0.47347
Thrsp	5	0.90909	0.90946	1	15565	0	0.22658	0.010855	0.038432	0.583167	1188	3	0.22658
Jhdm1d	5	0.96648	0.96669	1	16962	0	0.53301	0.010896	0.038547	0.584406	1189	4	0.53301
Mt1	4	0.88728	0.88737	1	15093	0	0.41126	0.010897	0.0362	0.565613	1190	3	0.41126
Kif6	5	0.99361	0.99362	1	17820	0	0.39682	0.010932	0.038666	0.584406	1191	4	0.39682
Gnb1l	5	0.71052	0.76475	1	12426	1	0.4466	0.010935	0.038673	0.584406	1192	3	0.4466
Tifa	5	0.84177	0.84627	1	14157	1	-0.14911	0.010935	0.038673	0.584406	1193	1	-0.14911
Vmn1r198	5	0.1548	0.30824	1	4938	3	-0.32656	0.010935	0.038673	0.584406	1194	1	-0.32656
Hist1h4d	2	0.98904	0.98903	1	17640	0	1.3848	0.010958	0.020693	0.427101	1195	2	1.3848
Bmpr2	5	0.97714	0.97728	1	17254	0	0.22635	0.010979	0.038819	0.586136	1196	3	0.22635
Vmn1r17	3	0.98899	0.98912	1	17638	0	0.60242	0.011007	0.029397	0.509495	1197	3	0.60242
Ces1e	5	0.87155	0.87219	1	14745	1	0.30893	0.01104	0.039	0.58742	1198	4	0.30893
Ccdc93	5	0.88548	0.88597	1	15046	0	0.474	0.011064	0.039077	0.588105	1199	4	0.474
Retn	5	0.9024	0.90279	1	15424	0	0.48848	0.011102	0.039194	0.588899	1200	4	0.48848
Hsd17b2	5	0.83619	0.84192	1	14066	1	0.36216	0.011152	0.039346	0.589927	1201	4	0.36216
Lep	5	0.97326	0.97334	1	17147	0	0.35073	0.011157	0.039358	0.589927	1202	4	0.35073
Mpdu1	5	0.97728	0.97742	1	17261	0	0.20631	0.011173	0.039409	0.590031	1203	3	0.20631
Smc6	5	0.65424	0.7388	1	11912	1	0.7496	0.011181	0.039429	0.590031	1204	4	0.7496
Ubqln3	5	0.80117	0.81658	1	13495	1	0.44109	0.011198	0.039479	0.590299	1205	4	0.44109
Dus4l	5	0.29989	0.47412	1	7404	1	0.72955	0.011224	0.039541	0.590736	1206	3	0.72955
Akp3	5	0.97318	0.97326	1	17145	0	0.61727	0.011331	0.039831	0.592689	1207	4	0.61727
Oxa1l	5	0.91837	0.91867	1	15792	0	0.3404	0.011348	0.039882	0.592689	1208	4	0.3404
Xrcc3	5	0.8734	0.874	1	14782	1	0.36912	0.011351	0.039891	0.592689	1209	4	0.36912
Rab30	5	0.97791	0.97805	1	17278	0	0.52058	0.011355	0.039897	0.592689	1210	4	0.52058
Praf2	5	0.9621	0.96231	1	16861	0	0.30436	0.011383	0.039979	0.59301	1211	4	0.30436
Ccl22	4	0.92221	0.92244	1	15881	0	0.45631	0.0114	0.03778	0.579968	1212	3	0.45631
Aldh1a3	5	0.98803	0.98806	1	17597	0	0.33684	0.011401	0.040033	0.593274	1213	4	0.33684
Sla	5	0.9869	0.98695	1	17555	0	0.44232	0.011425	0.040104	0.593856	1214	4	0.44232
Nrf1	5	0.99269	0.99274	1	17779	0	0.66068	0.011483	0.040273	0.595698	1215	3	0.66068
Cd209g	4	0.93408	0.9342	1	16149	0	0.50913	0.011488	0.03805	0.581213	1216	3	0.50913
Bpifa3	5	0.71749	0.7682	1	12493	1	0.40288	0.01149	0.040294	0.595698	1217	4	0.40288
Adamts9	5	0.29233	0.46773	1	7304	2	0.4351	0.011526	0.040404	0.596853	1218	3	0.4351
Vmn1r70	5	0.18203	0.34839	1	5496	3	-0.18133	0.011544	0.040456	0.597144	1219	1	-0.18133
Ctxn1	4	0.98842	0.98845	1	17614	0	0.40922	0.011585	0.038349	0.58288	1220	4	0.40922
Fmo9	4	0.98841	0.98844	1	17613	0	0.48637	0.011594	0.038382	0.58288	1221	4	0.48637
AU021092	5	0.83662	0.84226	1	14074	1	0.04308	0.011623	0.04067	0.598998	1222	2	0.04308
Pja1	5	0.97492	0.97505	1	17185	0	0.30725	0.011626	0.04068	0.598998	1223	4	0.30725
Obox1	3	0.98835	0.98852	1	17611	0	0.49378	0.01165	0.030955	0.522517	1224	3	0.49378
Dao	5	0.90973	0.91011	1	15587	0	0.46578	0.011677	0.040831	0.600706	1225	4	0.46578
Sox13	5	0.99261	0.99268	1	17774	0	0.33665	0.011687	0.040861	0.600706	1226	4	0.33665
Rangap1	5	0.036403	0.10682	0.873212	2219	2	-0.055306	0.011738	0.041003	0.601833	1227	1	-0.055306
Nars	5	0.0096318	0.034437	0.510366	1236	4	-1.1893	0.011738	0.041003	0.601833	1228	1	-1.1893
Ctdp1	5	0.64455	0.73471	1	11832	1	0.65744	0.011769	0.041083	0.602528	1229	3	0.65744
Nxpe3	4	0.87959	0.87975	1	14919	0	0.53176	0.011772	0.038936	0.587417	1230	3	0.53176
Ccdc92	5	0.95398	0.95422	1	16656	0	0.55236	0.011783	0.041128	0.602703	1231	4	0.55236
Crtac1	5	0.91358	0.91392	1	15673	0	0.46526	0.011826	0.041249	0.604004	1232	4	0.46526
2210018M11Rik	5	0.6852	0.75261	1	12180	1	0.32126	0.01184	0.041294	0.604185	1233	4	0.32126
Dgcr2	5	0.3704	0.53361	1	8325	1	0.33183	0.011903	0.041477	0.605996	1234	4	0.33183
Gpn3	4	0.98809	0.98812	1	17602	0	0.36379	0.01191	0.039356	0.589927	1235	4	0.36379
Adi1	5	0.51274	0.65767	1	10414	2	0.51906	0.011926	0.04155	0.605996	1236	3	0.51906
Mboat2	5	0.88544	0.88593	1	15044	0	0.32197	0.011987	0.041724	0.607546	1237	4	0.32197
St3gal4	5	0.55489	0.6958	1	11096	1	0.36574	0.011994	0.041746	0.607546	1238	4	0.36574
Scgb1b27	3	0.099853	0.18079	1	3714	1	-0.182	0.012008	0.031859	0.53068	1239	1	-0.182
Csn1s2b	5	0.91866	0.91897	1	15799	0	0.39439	0.012009	0.041787	0.607546	1240	3	0.39439
Josd1	5	0.96283	0.96305	1	16877	0	0.52831	0.012009	0.041788	0.607546	1241	3	0.52831
Atp2a2	5	0.68665	0.7533	1	12190	1	1.0147	0.012068	0.04196	0.608661	1242	4	1.0147
Tomm6	5	0.96695	0.96714	1	16981	0	0.95112	0.012095	0.042046	0.608814	1243	4	0.95112
Gm16532	5	0.32433	0.49455	1	7707	1	0.34662	0.012109	0.042081	0.608814	1244	4	0.34662
Mtbp	5	0.93188	0.93218	1	16097	0	0.62729	0.012127	0.042127	0.608814	1245	3	0.62729
Pgs1	5	0.96191	0.96211	1	16855	0	0.64333	0.012144	0.042176	0.608814	1246	3	0.64333
Taz	5	0.93684	0.93712	1	16212	0	0.38197	0.012149	0.042193	0.608814	1247	4	0.38197
Sva	5	0.92501	0.92537	1	15939	0	0.43539	0.012153	0.042206	0.608814	1248	4	0.43539
Saa1	5	0.61096	0.72107	1	11580	1	0.52264	0.012211	0.042365	0.609978	1249	3	0.52264
Akr1c12	5	0.42183	0.57787	1	9067	1	0.41208	0.012217	0.042382	0.609978	1250	4	0.41208
Arhgap10	5	0.97341	0.9735	1	17148	0	0.55078	0.012218	0.042387	0.609978	1251	4	0.55078
Gm1140	5	0.9242	0.92454	1	15921	0	0.37954	0.012235	0.042435	0.609978	1252	3	0.37954
Snrnp48	5	0.67045	0.74582	1	12053	1	0.64898	0.01224	0.042453	0.609978	1253	3	0.64898
Fancf	5	0.93216	0.93244	1	16101	0	0.28559	0.012266	0.042537	0.610714	1254	4	0.28559
Safb	5	0.91895	0.91928	1	15806	0	0.32203	0.012284	0.042585	0.610726	1255	4	0.32203
Rsf1	5	0.80984	0.82254	1	13619	1	0.67505	0.012291	0.042605	0.610726	1256	4	0.67505
Kcnk6	5	0.51902	0.66327	1	10507	1	0.30443	0.012323	0.042698	0.610726	1257	4	0.30443
Scaf1	5	0.93382	0.93408	1	16140	0	0.66321	0.012325	0.042704	0.610726	1258	3	0.66321
Pigz	5	0.28746	0.46369	1	7251	2	0.15782	0.012353	0.042789	0.611361	1259	3	0.15782
Zfp592	5	0.61351	0.72211	1	11597	1	0.32561	0.012364	0.042815	0.611361	1260	4	0.32561
Tmem39a	5	0.41272	0.57007	1	8936	1	0.59324	0.012431	0.043023	0.613523	1261	3	0.59324
1700037C18Rik	5	0.99175	0.99181	1	17743	0	0.4275	0.012454	0.043078	0.613523	1262	4	0.4275
Rasip1	5	0.90952	0.9099	1	15577	0	0.31808	0.012489	0.043172	0.613523	1263	4	0.31808
Sap30l	5	0.95645	0.95671	1	16705	0	0.28618	0.012505	0.043215	0.613523	1264	4	0.28618
1810019J16Rik	5	0.98046	0.9806	1	17360	0	0.35294	0.012517	0.043249	0.613523	1265	4	0.35294
Prim1	5	0.45718	0.60868	1	9579	2	0.60056	0.012519	0.04325	0.613523	1266	3	0.60056
Mrgprb1	5	0.55819	0.69875	1	11143	1	0.44215	0.012536	0.043293	0.613523	1267	4	0.44215
Skp1a	5	0.36331	0.52758	1	8234	2	0.94188	0.012557	0.043349	0.613523	1268	3	0.94188
Il1rapl2	5	0.75556	0.78848	1	12880	1	0.54979	0.012557	0.043349	0.613523	1269	3	0.54979
Sept6	5	0.91442	0.91474	1	15700	0	-0.027804	0.012562	0.043366	0.613523	1270	2	-0.027804
Ap2a2	5	0.85064	0.85347	1	14320	1	-0.021044	0.012576	0.043414	0.61363	1271	2	-0.021044
Dtnb	5	0.74422	0.78216	1	12762	1	0.21122	0.012584	0.04344	0.61363	1272	3	0.21122
Llph	4	0.97679	0.97704	1	17237	0	0.39093	0.012599	0.041487	0.605996	1273	3	0.39093
Wdr83	5	0.99348	0.99349	1	17812	0	0.45191	0.012602	0.043493	0.61363	1274	4	0.45191
Golga4	5	0.98518	0.98529	1	17496	0	0.50057	0.01261	0.04352	0.61363	1275	4	0.50057
Igsf1	13	0.94473	0.9776	1	16400	2	0.34738	0.012614	0.065141	0.725511	1276	8	0.34738
Kctd19	5	0.83374	0.84	1	14024	1	0.39122	0.012617	0.04354	0.61363	1277	4	0.39122
Ciapin1	5	0.57558	0.70774	1	11312	1	0.4617	0.012652	0.043636	0.614509	1278	3	0.4617
Casz1	5	0.63624	0.73126	1	11768	1	0.26011	0.01268	0.043724	0.615273	1279	4	0.26011
Gpr65	5	0.87952	0.88001	1	14917	1	0.49311	0.012709	0.043808	0.615983	1280	3	0.49311
Krtap13-1	5	0.96128	0.96147	1	16832	0	0.35323	0.01273	0.043861	0.616269	1281	4	0.35323
Nkx2-6	5	0.98572	0.98582	1	17522	0	0.45476	0.012754	0.043921	0.616629	1282	3	0.45476
Nbr1	5	0.28484	0.46154	1	7210	2	0.35793	0.012791	0.04403	0.617699	1283	3	0.35793
Cav1	4	0.98717	0.98717	1	17568	0	0.30997	0.012829	0.042176	0.608814	1284	4	0.30997
Gramd1a	5	0.91542	0.9157	1	15723	0	0.32563	0.012887	0.044312	0.62118	1285	4	0.32563
Kcnj9	5	0.77555	0.80035	1	13117	1	0.41666	0.012933	0.044436	0.621974	1286	3	0.41666
Myog	5	0.86498	0.86602	1	14619	1	0.27249	0.012974	0.044558	0.622729	1287	4	0.27249
Mrfap1	5	0.81718	0.82781	1	13735	1	0.28949	0.012997	0.044614	0.62282	1288	4	0.28949
Mid2	5	0.7034	0.76124	1	12345	1	0.5263	0.013004	0.044632	0.62282	1289	4	0.5263
Osbp	5	0.82613	0.83424	1	13883	1	0.82177	0.013036	0.044724	0.623191	1290	3	0.82177
Tcof1	5	0.89526	0.89572	1	15267	0	0.52327	0.013063	0.044801	0.623191	1291	3	0.52327
Ankrd37	5	0.94305	0.94329	1	16359	0	0.35844	0.013064	0.044802	0.623191	1292	4	0.35844
Grwd1	5	0.98157	0.9817	1	17388	0	0.64825	0.013081	0.044846	0.623191	1293	4	0.64825
Fam3a	5	0.9913	0.99139	1	17726	0	0.33789	0.013088	0.044862	0.623191	1294	4	0.33789
Zdhhc9	5	0.98926	0.98933	1	17651	0	0.51711	0.013176	0.045125	0.626379	1295	4	0.51711
Znf512b	4	0.9868	0.98678	1	17551	0	0.25791	0.013199	0.043306	0.613523	1296	4	0.25791
Lyrm5	4	0.95946	0.95959	1	16791	0	0.62337	0.013208	0.043328	0.613523	1297	3	0.62337
Ipo5	5	0.94924	0.94949	1	16529	0	0.30803	0.013208	0.045222	0.626771	1298	4	0.30803
Ercc3	5	0.46783	0.61787	1	9721	2	0.40244	0.01326	0.045369	0.628333	1299	3	0.40244
Gpr50	5	0.9919	0.99197	1	17749	0	0.41557	0.013278	0.045417	0.62853	1300	4	0.41557
Nudt18	5	0.37472	0.5374	1	8377	2	-0.12387	0.013314	0.045514	0.629013	1301	2	-0.12387
Trmt12	5	0.94438	0.94463	1	16390	0	0.50123	0.013341	0.045583	0.629013	1302	4	0.50123
Dlec1	5	0.97015	0.97026	1	17063	0	0.29528	0.013342	0.045589	0.629013	1303	4	0.29528
Tchp	5	0.83683	0.84241	1	14077	1	-0.0014067	0.01337	0.045662	0.629558	1304	2	-0.0014067
Odam	5	0.89169	0.89215	1	15179	0	-0.024061	0.013393	0.045727	0.629976	1305	2	-0.024061
Rps7	2	0.9866	0.98666	1	17545	0	1.2676	0.013399	0.02519	0.472628	1306	2	1.2676
Mpi	5	0.89306	0.8935	1	15219	0	0.54609	0.013483	0.045987	0.631317	1307	4	0.54609
Bag4	5	0.65609	0.73959	1	11928	1	0.51679	0.013484	0.045989	0.631317	1308	4	0.51679
Agap3	5	0.64067	0.73311	1	11801	1	0.35947	0.0135	0.046022	0.631317	1309	4	0.35947
D730048I06Rik	5	0.43061	0.58549	1	9202	1	0.67102	0.013506	0.046041	0.631317	1310	3	0.67102
Atp6ap2	5	0.98767	0.98772	1	17585	0	0.48871	0.013515	0.046063	0.631317	1311	4	0.48871
Cyp27a1	5	0.52227	0.66619	1	10572	1	0.52831	0.013526	0.046099	0.631317	1312	3	0.52831
Clec5a	5	0.83512	0.84107	1	14047	1	0.58158	0.013526	0.046099	0.631317	1313	3	0.58158
Gm1564	4	0.37104	0.51471	1	8336	1	0.53462	0.013551	0.044399	0.62192	1314	3	0.53462
Tpte	5	0.79194	0.81051	1	13335	1	0.41859	0.013561	0.046194	0.631622	1315	4	0.41859
Fam71e2	5	0.86658	0.86751	1	14648	1	0.49059	0.01359	0.046284	0.631622	1316	4	0.49059
Ets2	5	0.94631	0.94657	1	16446	0	0.27277	0.013602	0.046313	0.631622	1317	4	0.27277
Hao1	5	0.96458	0.96478	1	16917	0	0.38287	0.013616	0.046345	0.631622	1318	4	0.38287
Plcg2	5	0.96843	0.96859	1	17018	0	0.55206	0.013622	0.046361	0.631622	1319	4	0.55206
Vmn2r22	4	0.70513	0.72393	1	12364	1	-0.031135	0.013679	0.044799	0.623191	1320	1	-0.031135
Myo18b	5	0.99278	0.99283	1	17782	0	0.48506	0.01371	0.046617	0.634641	1321	4	0.48506
Map3k4	5	0.81358	0.82523	1	13685	1	0.032569	0.013725	0.046665	0.63482	1322	2	0.032569
Lrig1	5	0.98542	0.98553	1	17510	0	0.32564	0.013743	0.046725	0.635173	1323	4	0.32564
Vwa5a	5	0.97935	0.97947	1	17321	0	0.37498	0.013759	0.04677	0.635311	1324	4	0.37498
Zfyve26	5	0.39346	0.55341	1	8644	2	0.21186	0.013786	0.046854	0.635985	1325	3	0.21186
Slc39a9	5	0.37715	0.53943	1	8412	1	0.48375	0.013815	0.046936	0.636622	1326	4	0.48375
Otog	5	0.65548	0.73932	1	11924	1	0.39343	0.013853	0.047042	0.637198	1327	4	0.39343
Serpinb6e	5	0.5422	0.68418	1	10886	1	0.076621	0.013868	0.047082	0.637198	1328	2	0.076621
Evi2b	5	0.66109	0.74176	1	11965	1	0.063739	0.013868	0.047082	0.637198	1329	1	0.063739
Ssxb1	1	0.98602	0.98605	1	17530	0	1.0541	0.013979	0.013836	0.344146	1330	1	1.0541
Insm2	4	0.95306	0.9532	1	16635	0	0.4995	0.014039	0.045923	0.631317	1331	3	0.4995
Aimp2	5	0.96194	0.96213	1	16856	0	0.19642	0.01404	0.047556	0.643139	1332	3	0.19642
Mbd3l2	5	0.049602	0.13946	0.944476	2677	2	0.53825	0.014089	0.047697	0.644578	1333	3	0.53825
Tns1	5	0.2359	0.4209	1	6575	1	-0.042164	0.014125	0.047783	0.644678	1334	2	-0.042164
Recql4	5	0.83916	0.84417	1	14111	1	0.5994	0.014135	0.04781	0.644678	1335	3	0.5994
Dock9	5	0.82276	0.83177	1	13827	1	0.32717	0.014168	0.047903	0.645467	1336	4	0.32717
Wdr75	5	0.69326	0.75637	1	12255	1	0.42697	0.014199	0.048003	0.646038	1337	3	0.42697
Fam120a	5	0.89555	0.89603	1	15272	0	0.314	0.014214	0.048044	0.646038	1338	4	0.314
Gmppb	5	0.96126	0.96145	1	16831	0	0.44559	0.014234	0.048099	0.646038	1339	3	0.44559
Cfl2	5	0.61654	0.72331	1	11616	1	0.58904	0.014236	0.0481	0.646038	1340	3	0.58904
Nanog	5	0.83051	0.83751	1	13971	1	0.78073	0.014244	0.048121	0.646038	1341	4	0.78073
Bfar	5	0.94192	0.94216	1	16341	0	0.30443	0.01426	0.048166	0.646166	1342	4	0.30443
Upf1	5	0.88168	0.88216	1	14971	0	-0.076918	0.01431	0.048307	0.646897	1343	2	-0.076918
Plscr5	5	0.19876	0.37268	1	5835	1	0.41798	0.014321	0.048334	0.646897	1344	4	0.41798
Helt	5	0.99096	0.99102	1	17715	0	0.47551	0.014364	0.048456	0.646897	1345	4	0.47551
Rfk	5	0.057839	0.15489	0.98433	2855	3	-0.49154	0.014365	0.048461	0.646897	1346	2	-0.49154
Tas2r119	5	0.98265	0.98273	1	17420	0	0.48295	0.014374	0.048486	0.646897	1347	4	0.48295
Ttll1	5	0.87534	0.8759	1	14831	1	0.34472	0.014409	0.048577	0.646897	1348	4	0.34472
Btla	5	0.93647	0.93677	1	16205	0	0.71146	0.014411	0.048583	0.646897	1349	4	0.71146
Fank1	5	0.90625	0.90663	1	15494	0	0.46927	0.014416	0.048598	0.646897	1350	4	0.46927
Fam132a	5	0.95892	0.95912	1	16779	0	0.29516	0.014416	0.048598	0.646897	1351	4	0.29516
Htr2a	5	0.81204	0.82413	1	13657	1	0.60052	0.014421	0.048607	0.646897	1352	4	0.60052
Apol10b	5	0.14166	0.28824	1	4631	2	0.50015	0.014464	0.04873	0.647893	1353	3	0.50015
Eri2	5	0.97164	0.97176	1	17103	0	0.36919	0.014471	0.048752	0.647893	1354	4	0.36919
Wdr59	5	0.89548	0.89595	1	15270	0	0.71627	0.014492	0.048796	0.648011	1355	4	0.71627
Stk32b	5	0.96916	0.96928	1	17035	0	0.49062	0.01452	0.048887	0.648743	1356	4	0.49062
Flt3	5	0.85727	0.85909	1	14474	1	0.4338	0.014536	0.048925	0.648743	1357	3	0.4338
Cacna2d4	5	0.47012	0.61988	1	9758	1	0.50147	0.014549	0.048957	0.648743	1358	3	0.50147
Krtap19-1	2	0.98543	0.9855	1	17511	0	0.66879	0.014574	0.027279	0.491286	1359	2	0.66879
Acsm1	5	0.68423	0.75218	1	12168	1	0.28107	0.014577	0.049043	0.649298	1360	4	0.28107
Chm	5	0.94235	0.94258	1	16351	0	0.3252	0.014586	0.04907	0.649298	1361	3	0.3252
Aamp	5	0.47341	0.62277	1	9799	1	0.77406	0.014613	0.049148	0.649799	1362	3	0.77406
Galp	4	0.82565	0.8257	1	13873	0	0.59331	0.014643	0.047809	0.644678	1363	3	0.59331
Xpr1	5	0.84787	0.85113	1	14263	1	0.47935	0.014653	0.049248	0.649799	1364	3	0.47935
Rpl8	5	0.85536	0.85746	1	14438	1	0.25857	0.014653	0.049249	0.649799	1365	2	0.25857
Mlh1	5	0.29618	0.47102	1	7350	1	0.53992	0.01467	0.049294	0.64993	1366	3	0.53992
Ufd1l	5	0.96144	0.96163	1	16836	0	0.36599	0.014696	0.049363	0.649973	1367	3	0.36599
Plk4	5	0.54317	0.68507	1	10900	1	0.29884	0.014728	0.049449	0.649973	1368	3	0.29884
Tssk6	5	0.96397	0.96418	1	16905	0	0.39089	0.014733	0.04946	0.649973	1369	3	0.39089
Btc	5	0.9428	0.94303	1	16358	0	0.30748	0.014736	0.049467	0.649973	1370	3	0.30748
Bre	5	0.80422	0.81863	1	13544	1	0.67057	0.014742	0.049487	0.649973	1371	4	0.67057
Rad23b	5	0.54343	0.68529	1	10903	1	0.54636	0.01475	0.049509	0.649973	1372	4	0.54636
Zfp202	5	0.96437	0.96455	1	16913	0	0.32312	0.014838	0.049765	0.65275	1373	4	0.32312
Aqp2	5	0.11477	0.24676	1	4041	2	0.20746	0.014847	0.049791	0.65275	1374	3	0.20746
Pelp1	5	0.94756	0.94781	1	16480	0	0.51428	0.014862	0.04983	0.652785	1375	4	0.51428
Dmtf1	5	0.38666	0.54757	1	8553	1	0.52115	0.014945	0.050068	0.654975	1376	4	0.52115
Spice1	5	0.53063	0.67372	1	10700	1	0.3957	0.014945	0.050068	0.654975	1377	4	0.3957
Helq	5	0.95559	0.95585	1	16687	0	0.47007	0.014987	0.050185	0.655668	1378	4	0.47007
Gnai2	5	0.6875	0.75371	1	12199	1	0.35643	0.01499	0.050192	0.655668	1379	4	0.35643
Gbp4	5	0.51275	0.65768	1	10415	1	0.38925	0.015036	0.050324	0.656924	1380	4	0.38925
Adam26b	4	0.98493	0.98497	1	17491	0	0.62702	0.015073	0.049182	0.649799	1381	4	0.62702
Carf	5	0.42804	0.58325	1	9162	1	0.37737	0.015087	0.050456	0.657968	1382	4	0.37737
Fam86	5	0.95459	0.95485	1	16667	0	0.44827	0.015108	0.050508	0.657968	1383	4	0.44827
Cant1	5	0.99253	0.9926	1	17767	0	0.35724	0.015123	0.050562	0.657968	1384	4	0.35724
Ctps	5	0.19864	0.37251	1	5831	1	0.54609	0.015133	0.050582	0.657968	1385	4	0.54609
Inhbb	5	0.32237	0.49283	1	7684	1	0.16226	0.015134	0.050583	0.657968	1386	3	0.16226
Pdlim2	5	0.90948	0.90986	1	15576	0	0.30918	0.015176	0.050704	0.658821	1387	4	0.30918
Lrrc4b	5	0.9878	0.98784	1	17590	0	0.24375	0.015182	0.05072	0.658821	1388	4	0.24375
Mms22l	5	0.92925	0.92955	1	16040	0	0.60164	0.015231	0.050862	0.659142	1389	4	0.60164
Zfp143	5	0.80459	0.81888	1	13548	1	0.77185	0.015234	0.050876	0.659142	1390	4	0.77185
Grin2d	5	0.6589	0.74079	1	11946	1	0.26557	0.015246	0.050904	0.659142	1391	4	0.26557
Trim54	5	0.92408	0.92443	1	15917	0	0.23351	0.015262	0.050953	0.659142	1392	4	0.23351
Hinfp	5	0.97087	0.97099	1	17081	0	0.58893	0.015276	0.050995	0.659142	1393	4	0.58893
Sash3	5	0.16938	0.32992	1	5257	1	0.46265	0.015291	0.051036	0.659201	1394	3	0.46265
Ocel1	5	0.687	0.75347	1	12194	1	0.41603	0.015379	0.051287	0.661885	1395	4	0.41603
2700097O09Rik	5	0.63307	0.72993	1	11737	1	0.40916	0.015387	0.051315	0.661885	1396	4	0.40916
Zzz3	5	0.61794	0.72387	1	11626	1	0.11154	0.015439	0.051462	0.663307	1397	3	0.11154
Anks1	5	0.55081	0.69203	1	11030	1	0.24667	0.015479	0.051563	0.664153	1398	4	0.24667
Sgta	5	0.9507	0.95094	1	16563	0	0.53165	0.01553	0.051708	0.665551	1399	4	0.53165
Boc	5	0.8574	0.85918	1	14478	1	0.34639	0.015573	0.051822	0.666087	1400	4	0.34639
Rab8a	5	0.83432	0.84047	1	14036	1	0.18071	0.015617	0.051953	0.666324	1401	2	0.18071
Nipa1	4	0.98437	0.98442	1	17470	0	0.45295	0.015632	0.050863	0.659142	1402	4	0.45295
Fbxo25	5	0.95236	0.9526	1	16612	0	0.35545	0.015652	0.052048	0.666324	1403	4	0.35545
Gm1078	5	0.85937	0.86092	1	14514	1	0.31466	0.015681	0.052135	0.666663	1404	4	0.31466
Sirt7	5	0.55419	0.69515	1	11083	1	0.52255	0.015689	0.052157	0.666663	1405	3	0.52255
C78339	5	0.8117	0.82388	1	13648	1	0.2925	0.01575	0.052345	0.667484	1406	4	0.2925
Psme3	5	0.96246	0.96267	1	16867	0	0.7489	0.015756	0.052354	0.667484	1407	4	0.7489
Afg3l1	5	0.86484	0.86588	1	14617	1	0.41257	0.01576	0.052366	0.667484	1408	4	0.41257
Lmod2	5	0.98922	0.98929	1	17648	0	0.37	0.015782	0.052423	0.667748	1409	4	0.37
Kdr	5	0.2287	0.41493	1	6500	2	0.62569	0.015846	0.052599	0.669525	1410	3	0.62569
Capn5	5	0.48576	0.63368	1	9999	1	0.50344	0.015914	0.052792	0.671519	1411	3	0.50344
Decr1	4	0.3964	0.54122	1	8684	2	-0.14794	0.015978	0.051749	0.665612	1412	1	-0.14794
Ctsh	5	0.80766	0.82104	1	13589	1	0.38582	0.015992	0.053006	0.673777	1413	4	0.38582
Psmc1	5	0.15435	0.30757	1	4928	3	-0.29191	0.016021	0.053096	0.67446	1414	1	-0.29191
Rbm28	5	0.95367	0.95392	1	16651	0	0.90034	0.016042	0.053159	0.674793	1415	4	0.90034
Vmn2r69	4	0.78402	0.78593	1	13232	1	1.1748	0.016057	0.051919	0.666324	1416	3	1.1748
AA792892	1	0.98392	0.98399	1	17456	0	1.1118	0.01608	0.015954	0.365395	1417	1	1.1118
Pqbp1	5	0.8217	0.831	1	13802	1	0.38777	0.016116	0.053377	0.675916	1418	4	0.38777
Rbm3	4	0.85298	0.85297	1	14370	0	0.60904	0.016126	0.052058	0.666324	1419	3	0.60904
Prcp	5	0.27898	0.45668	1	7124	2	0.64562	0.01613	0.053416	0.675916	1420	3	0.64562
Anapc10	5	0.72148	0.77025	1	12537	1	-0.024061	0.016133	0.053425	0.675916	1421	2	-0.024061
Xk	5	0.75303	0.78707	1	12852	1	0.57419	0.016136	0.053433	0.675916	1422	3	0.57419
Egfl6	5	0.4569	0.60844	1	9574	1	0.2602	0.016144	0.053456	0.675916	1423	4	0.2602
Scrt1	5	0.56887	0.70534	1	11268	1	0.32768	0.016149	0.053468	0.675916	1424	4	0.32768
Cit	5	0.93173	0.93203	1	16094	0	0.37564	0.016175	0.053536	0.676279	1425	4	0.37564
Vcp	5	0.91844	0.91874	1	15795	0	1.1774	0.016187	0.05357	0.676279	1426	3	1.1774
4833420G17Rik	5	0.80713	0.82066	1	13581	1	0.29344	0.016223	0.053683	0.676923	1427	4	0.29344
Gm9268	4	0.61915	0.66939	1	11642	1	0.4886	0.016233	0.052283	0.667484	1428	3	0.4886
1700007G11Rik	5	0.47527	0.62438	1	9840	1	0.35425	0.01624	0.053732	0.676923	1429	4	0.35425
Sh3tc1	5	0.94667	0.94691	1	16454	0	0.27969	0.016264	0.053792	0.677226	1430	4	0.27969
l7Rn6	5	0.08423	0.19809	1	3365	1	0.39523	0.016299	0.053892	0.677552	1431	4	0.39523
Chst5	5	0.70083	0.76	1	12320	1	0.29152	0.016336	0.053992	0.677561	1432	4	0.29152
Prl2c5	3	0.98365	0.9838	1	17451	0	0.55334	0.01635	0.042683	0.610726	1433	3	0.55334
Lrdd	5	0.70831	0.76365	1	12404	1	0.4479	0.016356	0.054049	0.677561	1434	4	0.4479
Zfp644	5	0.73363	0.77647	1	12650	1	0.44333	0.01636	0.054059	0.677561	1435	3	0.44333
Psmd4	5	0.090636	0.20857	1	3499	3	-0.52533	0.01638	0.054114	0.677561	1436	1	-0.52533
Ggps1	5	0.0026865	0.011624	0.25934	816	4	-1.3907	0.01638	0.054114	0.677561	1437	1	-1.3907
Wdr45	5	0.19407	0.3659	1	5743	2	0.039703	0.01638	0.054114	0.677561	1438	2	0.039703
Lztfl1	5	0.2724	0.45119	1	7055	2	0.55487	0.016421	0.054231	0.678568	1439	3	0.55487
Ebag9	5	0.98427	0.98437	1	17469	0	0.40829	0.016448	0.054315	0.679119	1440	4	0.40829
Mib1	5	0.077544	0.18727	1	3224	3	-0.32033	0.01648	0.054403	0.679119	1441	2	-0.32033
Zdhhc1	5	0.76905	0.79637	1	13038	1	0.47164	0.016497	0.054448	0.679119	1442	4	0.47164
Scarb1	5	0.60191	0.71761	1	11513	1	0.44188	0.016511	0.054489	0.679119	1443	3	0.44188
Sgpp1	5	0.66086	0.74164	1	11963	1	0.14882	0.016518	0.054505	0.679119	1444	3	0.14882
Dnajc5	5	0.96342	0.96363	1	16894	0	0.40912	0.016523	0.054525	0.679119	1445	3	0.40912
Tdp1	5	0.98255	0.98264	1	17416	0	0.39038	0.016527	0.054533	0.679119	1446	3	0.39038
Pcp2	5	0.59692	0.71571	1	11465	1	0.34964	0.016551	0.054603	0.67953	1447	4	0.34964
Atp6v1h	5	0.88469	0.88518	1	15024	0	0.45134	0.016628	0.054817	0.681727	1448	3	0.45134
Zfp114	5	0.94645	0.94669	1	16448	0	0.37326	0.01665	0.054879	0.682042	1449	4	0.37326
Catsperg2	5	0.92114	0.92149	1	15860	0	0.5445	0.016687	0.054977	0.682437	1450	3	0.5445
Ptpn23	5	0.95905	0.95925	1	16782	0	0.36852	0.016707	0.055035	0.682591	1451	4	0.36852
Cdh8	5	0.99066	0.99072	1	17704	0	0.48473	0.016722	0.055078	0.682665	1452	4	0.48473
BC094916	5	0.82271	0.83173	1	13826	1	0.60546	0.016753	0.055159	0.683052	1453	3	0.60546
Kpna1	5	0.98539	0.9855	1	17507	0	0.46974	0.016767	0.055203	0.683052	1454	4	0.46974
Gars	5	0.99372	0.99373	1	17825	0	0.45735	0.016788	0.055259	0.683072	1455	4	0.45735
Gtpbp4	5	0.84547	0.8492	1	14215	1	1.5606	0.016807	0.055313	0.683285	1456	3	1.5606
Apoc2	5	0.91175	0.9121	1	15627	0	0.062254	0.016823	0.055359	0.683391	1457	2	0.062254
Dscc1	5	0.98526	0.98537	1	17498	0	0.33397	0.01687	0.055494	0.684605	1458	4	0.33397
Polr2k	4	0.94192	0.94207	1	16340	0	0.32343	0.016906	0.053727	0.676923	1459	2	0.32343
Ces2g	5	0.15653	0.31083	1	4982	1	0.053455	0.016907	0.055591	0.685334	1460	2	0.053455
Ccdc12	5	0.21888	0.4012	1	6262	2	0.16855	0.016932	0.055661	0.685743	1461	2	0.16855
Nap1l5	5	0.23242	0.41799	1	6537	1	0.29531	0.017009	0.055874	0.687025	1462	4	0.29531
Dcaf8	5	0.95556	0.95582	1	16686	0	0.34036	0.017013	0.055885	0.687025	1463	4	0.34036
Rars	5	0.3575	0.52259	1	8149	2	0.69035	0.017097	0.056107	0.688908	1464	3	0.69035
1700109H08Rik	5	0.95132	0.95157	1	16587	0	0.5313	0.017109	0.056143	0.688908	1465	4	0.5313
Csn1s1	5	0.94717	0.94742	1	16469	0	0.52673	0.017131	0.056201	0.689157	1466	4	0.52673
Cpq	5	0.97682	0.97696	1	17239	0	0.33215	0.017204	0.056416	0.690666	1467	4	0.33215
Defb11	2	0.41262	0.42489	1	8933	1	0.58537	0.017218	0.031946	0.531641	1468	1	0.58537
Hsd11b2	5	0.81105	0.82341	1	13635	1	0.3088	0.01722	0.056462	0.690666	1469	4	0.3088
Dmbt1	5	0.97227	0.97238	1	17119	0	0.33716	0.017232	0.0565	0.690666	1470	4	0.33716
Kcne2	5	0.98725	0.9873	1	17570	0	0.46388	0.017237	0.056511	0.690666	1471	3	0.46388
Trim52	5	0.60127	0.71736	1	11503	1	0.3787	0.017297	0.056664	0.692074	1472	4	0.3787
Lrch4	5	0.59289	0.71413	1	11435	1	0.55066	0.017323	0.056748	0.692639	1473	3	0.55066
Sema3f	5	0.16847	0.32856	1	5240	2	0.36718	0.017348	0.056821	0.693073	1474	3	0.36718
Dmrtc1b	3	0.98263	0.98279	1	17419	0	0.46103	0.017371	0.04518	0.626661	1475	3	0.46103
A230046K03Rik	5	0.84536	0.84911	1	14211	1	0.53662	0.017432	0.057046	0.695361	1476	3	0.53662
Slc37a2	5	0.84794	0.85119	1	14264	1	0.41276	0.017466	0.057151	0.695577	1477	4	0.41276
Cdca7	5	0.77813	0.80193	1	13148	1	0.30814	0.017478	0.057181	0.695577	1478	4	0.30814
Ubald2	5	0.9782	0.97835	1	17289	0	0.54958	0.017492	0.057215	0.695577	1479	4	0.54958
H2afb3-ps	3	0.98249	0.98266	1	17413	0	0.36452	0.017511	0.045535	0.629013	1480	3	0.36452
Col6a4	5	0.99337	0.99339	1	17807	0	0.47268	0.01754	0.057353	0.696697	1481	4	0.47268
Trappc3l	5	0.89638	0.89683	1	15293	0	0.48863	0.017549	0.057383	0.696697	1482	4	0.48863
Gla	5	0.72838	0.77377	1	12599	1	0.57069	0.017593	0.057503	0.697687	1483	3	0.57069
Ddx20	5	0.12118	0.25661	1	4176	1	-0.090529	0.01762	0.057564	0.697977	1484	1	-0.090529
Cdc20	5	0.8984	0.89881	1	15338	0	0.51501	0.017672	0.057706	0.699065	1485	3	0.51501
Gdf15	5	0.9628	0.96302	1	16875	0	0.43965	0.01768	0.05773	0.699065	1486	4	0.43965
Tas2r120	5	0.47803	0.62684	1	9874	1	0.55523	0.017695	0.057775	0.699146	1487	3	0.55523
Spop	5	0.79242	0.81083	1	13345	1	0.39806	0.017715	0.057817	0.699201	1488	3	0.39806
Bzw1	3	0.98226	0.98244	1	17410	0	0.71211	0.017744	0.046146	0.631503	1489	3	0.71211
Nqo2	5	0.46555	0.61588	1	9694	2	0.48486	0.017746	0.057904	0.699788	1490	3	0.48486
Cd96	5	0.74315	0.78157	1	12743	1	0.32239	0.017763	0.057958	0.699885	1491	4	0.32239
Polr2j	5	0.75344	0.7873	1	12858	1	0.48101	0.017779	0.058008	0.699885	1492	4	0.48101
Apoa4	5	0.79626	0.81333	1	13410	1	0.28735	0.017786	0.058026	0.699885	1493	3	0.28735
Leng1	5	0.80358	0.8182	1	13529	1	0.3088	0.017836	0.058151	0.700931	1494	3	0.3088
Eif4g1	4	0.8123	0.81236	1	13661	1	0.58924	0.017844	0.055716	0.685953	1495	2	0.58924
Pfdn5	5	0.67398	0.74744	1	12086	1	0.62504	0.0179	0.05834	0.701991	1496	3	0.62504
Vmn1r86	5	0.80039	0.81605	1	13476	1	0.45485	0.017905	0.058356	0.701991	1497	3	0.45485
Sdc1	5	0.99292	0.99296	1	17788	0	0.36545	0.017913	0.058391	0.701991	1498	4	0.36545
Gm6377	5	0.98733	0.98738	1	17576	0	0.71314	0.017942	0.058468	0.702457	1499	4	0.71314
Wnt5b	5	0.83362	0.83992	1	14021	1	0.50015	0.017965	0.058531	0.702535	1500	3	0.50015
Tmco2	5	0.87211	0.87273	1	14757	1	0.39976	0.017972	0.058551	0.702535	1501	4	0.39976
Scyl3	5	0.97705	0.97719	1	17249	0	0.25356	0.018052	0.05876	0.704127	1502	4	0.25356
Smpd1	5	0.98349	0.98359	1	17446	0	0.16187	0.018052	0.05876	0.704127	1503	3	0.16187
Maf	5	0.98939	0.98947	1	17653	0	0.33863	0.018087	0.058865	0.704521	1504	4	0.33863
Sos2	5	0.96359	0.96379	1	16898	0	0.37682	0.018104	0.058907	0.704521	1505	3	0.37682
4931417E11Rik	5	0.90174	0.90212	1	15406	0	0.034355	0.018121	0.058954	0.704521	1506	2	0.034355
C130074G19Rik	5	0.31485	0.48661	1	7580	1	0.26998	0.018133	0.05899	0.704521	1507	4	0.26998
Npm2	5	0.94458	0.94483	1	16396	0	0.12043	0.018139	0.059001	0.704521	1508	2	0.12043
Tmem50b	5	0.99256	0.99263	1	17772	0	0.56629	0.018148	0.059023	0.704521	1509	4	0.56629
Derl2	5	0.43209	0.58682	1	9229	1	0.5011	0.018202	0.059175	0.705038	1510	4	0.5011
Timm17b	5	0.73545	0.77743	1	12671	1	0.31904	0.018208	0.059186	0.705038	1511	4	0.31904
Tcfl5	5	0.8058	0.81972	1	13562	1	0.085209	0.018226	0.059245	0.705038	1512	2	0.085209
Zfp384	5	0.24705	0.43016	1	6717	2	0.68919	0.018237	0.059274	0.705038	1513	3	0.68919
Zfp580	5	0.97024	0.97034	1	17067	0	0.26553	0.01825	0.059302	0.705038	1514	4	0.26553
Ruvbl2	5	0.8302	0.83728	1	13967	1	0.64144	0.018252	0.059311	0.705038	1515	3	0.64144
Nqo1	5	0.075907	0.18462	1	3194	2	0.50103	0.018261	0.059334	0.705038	1516	3	0.50103
Creg1	5	0.53185	0.67479	1	10719	1	0.30614	0.018337	0.059535	0.706176	1517	3	0.30614
Grxcr2	5	0.98999	0.99005	1	17680	0	0.51518	0.018369	0.059625	0.70642	1518	4	0.51518
Vmn1r149	1	0.98163	0.98173	1	17390	0	1.7757	0.018372	0.018291	0.398412	1519	1	1.7757
Gm1045	5	0.8588	0.86039	1	14502	1	0.30066	0.018377	0.059642	0.70642	1520	4	0.30066
Cdk9	5	0.55807	0.69866	1	11141	1	0.17887	0.018392	0.059684	0.706463	1521	2	0.17887
Zfp428	5	0.96582	0.966	1	16944	0	0.32908	0.018441	0.059813	0.70724	1522	4	0.32908
Nenf	5	0.88288	0.88337	1	14986	0	0.46401	0.018446	0.059827	0.70724	1523	3	0.46401
Tsc22d1	15	0.97274	0.99	1	17136	2	0.084057	0.018456	0.091585	0.806505	1524	5	0.084057
Defa26	2	0.98154	0.98164	1	17387	0	0.63479	0.018462	0.034201	0.550271	1525	2	0.63479
Rltpr	5	0.7771	0.80128	1	13135	1	0.36478	0.018469	0.05989	0.707536	1526	4	0.36478
Dpysl3	5	0.96611	0.9663	1	16953	0	0.3645	0.018509	0.059997	0.708298	1527	4	0.3645
Ces3a	4	0.97768	0.97793	1	17275	0	0.47063	0.018517	0.057172	0.695577	1528	3	0.47063
Pou2f3	5	0.91994	0.92028	1	15833	0	0.41337	0.018551	0.060128	0.708428	1529	4	0.41337
Kif26b	5	0.85699	0.85883	1	14472	1	0.31685	0.018556	0.060142	0.708428	1530	4	0.31685
Omp	5	0.94191	0.94215	1	16339	0	0.31026	0.018562	0.060158	0.708428	1531	4	0.31026
Tmem50a	5	0.96492	0.96513	1	16925	0	0.28552	0.018584	0.060221	0.708709	1532	3	0.28552
Eras	5	0.99359	0.99361	1	17819	0	0.31083	0.018623	0.060329	0.709046	1533	4	0.31083
Tbcb	5	0.97657	0.97671	1	17227	0	0.64828	0.018633	0.060362	0.709046	1534	4	0.64828
Cyp2e1	5	0.87024	0.87089	1	14723	1	0.33731	0.018652	0.060408	0.709046	1535	4	0.33731
Dynlrb1	5	0.84607	0.8497	1	14230	1	0.040616	0.018667	0.060441	0.709046	1536	2	0.040616
Adcy6	5	0.83958	0.84447	1	14121	1	0.38442	0.018678	0.060473	0.709046	1537	3	0.38442
Mrgprg	5	0.94051	0.94075	1	16298	0	0.40047	0.018681	0.06048	0.709046	1538	4	0.40047
Blzf1	5	0.12289	0.25921	1	4209	1	0.62476	0.0187	0.060536	0.709244	1539	4	0.62476
Lypd3	5	0.89208	0.89252	1	15194	0	0.34203	0.018751	0.060673	0.710134	1540	4	0.34203
Asah1	5	0.984	0.9841	1	17461	0	0.2213	0.018777	0.060736	0.710134	1541	4	0.2213
Gdpd3	5	0.30904	0.48167	1	7505	1	0.15454	0.018778	0.06074	0.710134	1542	3	0.15454
Irf6	5	0.7042	0.76167	1	12351	1	0.68209	0.018788	0.060766	0.710134	1543	4	0.68209
Cotl1	5	0.99369	0.9937	1	17822	0	0.44649	0.018833	0.060879	0.710315	1544	4	0.44649
Emilin1	5	0.87817	0.87865	1	14884	1	0.48365	0.018837	0.060886	0.710315	1545	3	0.48365
Il16	5	0.9567	0.95694	1	16715	0	0.27992	0.018845	0.060911	0.710315	1546	4	0.27992
Gdpgp1	5	0.85642	0.85837	1	14460	1	0.31969	0.018875	0.060982	0.710315	1547	4	0.31969
Pabpn1l	5	0.9821	0.98223	1	17402	0	0.33275	0.018893	0.061031	0.710315	1548	4	0.33275
Fbxo22	5	0.66612	0.74392	1	12021	1	0.42459	0.018895	0.061043	0.710315	1549	4	0.42459
Atp2b3	5	0.29051	0.46621	1	7284	1	0.4933	0.018899	0.061052	0.710315	1550	3	0.4933
Tmem121	5	0.9885	0.98855	1	17620	0	0.37995	0.018929	0.061129	0.710493	1551	4	0.37995
Slc9a7	5	0.42636	0.58178	1	9139	1	0.54267	0.018935	0.061144	0.710493	1552	4	0.54267
Prpf40b	5	0.9618	0.962	1	16851	0	0.40976	0.018962	0.061221	0.710621	1553	4	0.40976
Cntn3	5	0.96798	0.96814	1	17004	0	0.30503	0.018968	0.061232	0.710621	1554	4	0.30503
Eif4a2	6	0.7746	0.83109	1	13102	1	0.43584	0.019067	0.069302	0.738302	1555	4	0.43584
Ddx24	5	0.66899	0.74517	1	12039	1	0.4413	0.019072	0.061529	0.713611	1556	3	0.4413
Mrgpra1	5	0.80102	0.81648	1	13492	1	0.42461	0.01914	0.061708	0.713774	1557	4	0.42461
Bach1	5	0.38552	0.5466	1	8535	1	0.18631	0.019141	0.061716	0.713774	1558	4	0.18631
Vmn1r205	2	0.98086	0.98096	1	17371	0	0.71717	0.019144	0.035426	0.562946	1559	2	0.71717
Kcnk5	5	0.88301	0.8835	1	14989	0	0.25566	0.019152	0.06174	0.713774	1560	4	0.25566
Usb1	5	0.83704	0.84255	1	14079	1	0.2476	0.019182	0.061813	0.713774	1561	4	0.2476
Slc36a3	5	0.9173	0.91763	1	15768	0	0.28834	0.019189	0.06183	0.713774	1562	4	0.28834
Ceacam1	5	0.88666	0.88714	1	15080	0	-0.003701	0.019195	0.061845	0.713774	1563	2	-0.003701
Eps15	5	0.69201	0.75582	1	12240	1	0.036022	0.019221	0.061933	0.714001	1564	2	0.036022
Adam25	5	0.81136	0.82364	1	13642	1	0.50395	0.019251	0.062019	0.714001	1565	3	0.50395
Vps11	5	0.44536	0.59831	1	9411	1	0.31792	0.019255	0.062028	0.714001	1566	4	0.31792
Heatr2	5	0.82173	0.83102	1	13803	1	0.29889	0.019302	0.062163	0.71497	1567	3	0.29889
Fam43a	5	0.8724	0.873	1	14762	1	0.34046	0.019316	0.062209	0.71497	1568	4	0.34046
4931406B18Rik	5	0.45292	0.60491	1	9517	1	0.53713	0.019363	0.062336	0.715325	1569	3	0.53713
Atl1	5	0.14683	0.29608	1	4760	2	0.22371	0.019364	0.062337	0.715325	1570	3	0.22371
Ipo11	5	0.80906	0.822	1	13613	1	0.67199	0.019386	0.062388	0.715465	1571	3	0.67199
Prl8a8	5	0.75783	0.78981	1	12903	1	0.29209	0.019409	0.062448	0.715621	1572	3	0.29209
Ppfia1	5	0.99304	0.99307	1	17794	0	0.29072	0.019422	0.062484	0.715621	1573	4	0.29072
Atp5d	5	0.52483	0.66847	1	10606	2	0.32482	0.019436	0.062519	0.715621	1574	3	0.32482
Ydjc	5	0.98684	0.98689	1	17552	0	0.23081	0.019476	0.06263	0.71645	1575	4	0.23081
Vps16	5	0.98611	0.98619	1	17533	0	0.30529	0.019499	0.062692	0.716718	1576	4	0.30529
Tuba1c	2	0.19458	0.25339	1	5753	1	0.77347	0.019511	0.036064	0.564638	1577	1	0.77347
Vsx2	5	0.96531	0.96551	1	16934	0	0.39246	0.019582	0.062911	0.718447	1578	4	0.39246
Trmt1l	5	0.98188	0.98201	1	17397	0	0.34037	0.019588	0.06293	0.718447	1579	4	0.34037
Tmem63c	5	0.87737	0.87788	1	14870	1	0.29403	0.019608	0.062985	0.718447	1580	4	0.29403
Fgd5	5	0.77865	0.80224	1	13153	1	0.36998	0.019629	0.063039	0.718447	1581	4	0.36998
Zfp407	5	0.86909	0.86983	1	14694	1	0.74883	0.019629	0.063039	0.718447	1582	4	0.74883
Zscan4d	2	0.98035	0.98044	1	17354	0	0.52927	0.019653	0.036329	0.566676	1583	2	0.52927
Rab20	5	0.99402	0.99403	1	17838	0	0.47502	0.019662	0.06312	0.718483	1584	4	0.47502
Nudt14	5	0.99097	0.99104	1	17716	0	0.46174	0.019699	0.063217	0.71888	1585	4	0.46174
Neil3	5	0.51651	0.66098	1	10466	2	0.28081	0.019733	0.06331	0.719316	1586	3	0.28081
Prl3d2	3	0.29136	0.41505	1	7295	1	0.19031	0.019772	0.050985	0.659142	1587	2	0.19031
Stard5	5	0.56524	0.70403	1	11240	1	0.30476	0.019776	0.063438	0.720157	1588	4	0.30476
Insl3	5	0.90779	0.90816	1	15532	0	0.23503	0.019784	0.063463	0.720157	1589	4	0.23503
Ces2c	4	0.70921	0.72674	1	12409	1	0.379	0.019869	0.060032	0.708298	1590	2	0.379
Adap1	5	0.98844	0.9885	1	17615	0	0.19678	0.019877	0.063726	0.721965	1591	4	0.19678
Phf20l1	5	0.9387	0.93894	1	16257	0	0.3871	0.019882	0.06374	0.721965	1592	4	0.3871
Ska1	5	0.544	0.68581	1	10915	2	-0.0012797	0.019923	0.063847	0.722301	1593	2	-0.0012797
Tmem258	5	0.54394	0.68576	1	10913	2	-0.11425	0.019933	0.063878	0.722301	1594	1	-0.11425
Bcorl1	5	0.9915	0.99158	1	17733	0	0.36085	0.019945	0.063903	0.722301	1595	4	0.36085
Serpina5	5	0.94928	0.94953	1	16531	0	0.25224	0.019953	0.063926	0.722301	1596	4	0.25224
Ddx21	5	0.9807	0.98085	1	17365	0	0.52615	0.02005	0.064183	0.724472	1597	3	0.52615
Nln	5	0.77737	0.80145	1	13141	1	0.6038	0.020066	0.064234	0.724472	1598	3	0.6038
Erbb3	5	0.98441	0.98453	1	17473	0	0.46065	0.020073	0.064249	0.724472	1599	4	0.46065
Tbc1d8b	5	0.02411	0.074693	0.756219	1796	3	-0.36887	0.020095	0.064315	0.724472	1600	2	-0.36887
Nat9	5	0.98968	0.98976	1	17664	0	0.30027	0.020122	0.064383	0.724792	1601	4	0.30027
1700112E06Rik	5	0.55263	0.69369	1	11057	1	0.12583	0.020159	0.064476	0.724833	1602	3	0.12583
Defb43	3	0.97983	0.97999	1	17331	0	0.26286	0.020166	0.051986	0.666324	1603	3	0.26286
Pgm2l1	5	0.94876	0.94903	1	16516	0	0.44114	0.020168	0.064502	0.724833	1604	4	0.44114
Cyp3a11	2	0.54068	0.54142	1	10867	1	0.38557	0.020186	0.037326	0.574908	1605	1	0.38557
Chmp1a	5	0.70869	0.76383	1	12405	1	0.39741	0.020188	0.064563	0.724833	1606	3	0.39741
Zar1	5	0.5711	0.70613	1	11286	1	0.25014	0.0202	0.064591	0.724833	1607	4	0.25014
Smarcd3	5	0.88065	0.88113	1	14939	0	0.22722	0.020204	0.0646	0.724833	1608	4	0.22722
Slc7a6	5	0.40502	0.56346	1	8829	1	0.30772	0.020273	0.064769	0.725381	1609	4	0.30772
Zfp160	5	0.88298	0.88346	1	14988	0	0.55528	0.020277	0.064779	0.725381	1610	3	0.55528
Morf4l1	5	0.98076	0.9809	1	17368	0	0.30221	0.020287	0.064808	0.725381	1611	4	0.30221
Krt24	5	0.42847	0.58364	1	9171	1	0.46819	0.020295	0.06483	0.725381	1612	3	0.46819
Chordc1	5	0.80974	0.82246	1	13618	1	0.42539	0.020332	0.064929	0.725511	1613	2	0.42539
Wdr74	5	0.97343	0.97352	1	17150	0	0.3949	0.020339	0.06495	0.725511	1614	4	0.3949
Jph3	5	0.86752	0.86838	1	14663	1	0.40803	0.020369	0.065034	0.725511	1615	3	0.40803
Ddx19a	5	0.077341	0.18694	1	3219	2	-0.1851	0.020373	0.065047	0.725511	1616	1	-0.1851
Ttll3	5	0.82548	0.83372	1	13871	1	0.45641	0.020373	0.065051	0.725511	1617	4	0.45641
Samd1	5	0.84926	0.85229	1	14292	1	0.39632	0.020415	0.065167	0.725511	1618	4	0.39632
Jam2	5	0.8681	0.86892	1	14674	1	0.20522	0.020427	0.065196	0.725511	1619	3	0.20522
Capn12	5	0.93383	0.93409	1	16141	0	0.36546	0.020477	0.065317	0.726419	1620	4	0.36546
Phldb2	5	0.42331	0.57917	1	9083	1	0.34359	0.020517	0.065431	0.726597	1621	4	0.34359
Peg10	5	0.32315	0.49351	1	7691	1	0.046053	0.020525	0.065451	0.726597	1622	2	0.046053
Gm3336	5	0.98509	0.9852	1	17495	0	0.381	0.020545	0.065507	0.72678	1623	4	0.381
Zfp579	5	0.27603	0.45424	1	7091	2	0.20668	0.020607	0.06567	0.726973	1624	3	0.20668
Slmo1	5	0.98361	0.98373	1	17449	0	0.42485	0.020613	0.065683	0.726973	1625	3	0.42485
Hspa12b	5	0.43328	0.58784	1	9238	1	0.42426	0.020613	0.065683	0.726973	1626	3	0.42426
Mamstr	5	0.90872	0.9091	1	15560	0	0.22501	0.020657	0.065806	0.727898	1627	4	0.22501
Tle4	5	0.70257	0.76083	1	12337	1	0.28506	0.020692	0.065902	0.728088	1628	4	0.28506
Zfp473	5	0.89305	0.89349	1	15218	0	0.50112	0.020721	0.065982	0.728351	1629	4	0.50112
Cttn	5	0.7882	0.80818	1	13282	1	0.51968	0.020733	0.066015	0.728351	1630	3	0.51968
Tnfrsf14	5	0.09929	0.22235	1	3702	2	0.37014	0.020761	0.066086	0.728351	1631	3	0.37014
9030624J02Rik	5	0.99	0.99006	1	17681	0	0.30375	0.020772	0.06612	0.728351	1632	4	0.30375
Commd9	5	0.18653	0.35498	1	5582	3	-0.16697	0.020773	0.066124	0.728351	1633	2	-0.16697
Gabra2	5	0.9943	0.99432	1	17852	0	0.24114	0.020859	0.066345	0.729699	1634	4	0.24114
Wisp1	5	0.90781	0.90819	1	15533	0	0.37705	0.020875	0.066383	0.729699	1635	4	0.37705
Ugdh	5	0.98955	0.98963	1	17658	0	0.24686	0.020881	0.066397	0.729699	1636	4	0.24686
Msh3	5	0.91264	0.91297	1	15650	0	0.10287	0.020884	0.066407	0.729699	1637	3	0.10287
4930451I11Rik	5	0.76065	0.79144	1	12932	1	0.29658	0.020897	0.066444	0.729699	1638	4	0.29658
Apol9b	3	0.85192	0.85192	1	14340	0	0.5967	0.020917	0.053891	0.677552	1639	2	0.5967
Aplp2	5	0.96227	0.96248	1	16865	0	0.4904	0.020944	0.066573	0.730681	1640	3	0.4904
Ylpm1	5	0.59033	0.71313	1	11416	1	0.45668	0.021032	0.066823	0.732641	1641	4	0.45668
Tex264	5	0.62858	0.72807	1	11700	1	0.28806	0.021036	0.066832	0.732641	1642	4	0.28806
Pcnxl2	5	0.78578	0.80665	1	13256	1	0.38767	0.021062	0.066904	0.732841	1643	3	0.38767
Ctag2	5	0.74352	0.78177	1	12750	1	0.40764	0.021072	0.06693	0.732841	1644	3	0.40764
Smo	5	0.48052	0.62904	1	9920	1	0.46355	0.021091	0.066986	0.733018	1645	3	0.46355
Ccdc7	5	0.46025	0.61126	1	9623	2	0.4399	0.021142	0.067144	0.733923	1646	3	0.4399
Ehmt1	5	0.86224	0.86349	1	14566	1	0.212	0.021144	0.067148	0.733923	1647	4	0.212
Gm9041	2	0.72029	0.71995	1	12524	0	1.2824	0.02116	0.039137	0.588531	1648	1	1.2824
Cd37	5	0.95434	0.95459	1	16662	0	0.25816	0.021179	0.067239	0.734137	1649	4	0.25816
Zfy2	5	0.4578	0.60919	1	9590	1	0.7548	0.021198	0.067294	0.734137	1650	4	0.7548
Lias	5	0.63474	0.73063	1	11756	1	0.63355	0.021219	0.067348	0.734137	1651	3	0.63355
Atp6v0c	5	0.78099	0.80365	1	13186	1	0.87343	0.021237	0.067398	0.734137	1652	3	0.87343
Kpna7	5	0.88414	0.88462	1	15010	0	0.071749	0.021265	0.06748	0.734137	1653	2	0.071749
Gkn3	5	0.91	0.91037	1	15591	0	0.36975	0.021293	0.067543	0.734137	1654	4	0.36975
Esco1	5	0.9776	0.97775	1	17270	0	0.33824	0.021304	0.067571	0.734137	1655	4	0.33824
Ccni	5	0.5871	0.71195	1	11390	1	0.47165	0.021309	0.06758	0.734137	1656	3	0.47165
Clec1a	5	0.99425	0.99426	1	17849	0	0.48264	0.02132	0.067606	0.734137	1657	4	0.48264
Hoxa6	5	0.63303	0.72992	1	11736	1	0.24208	0.021401	0.067815	0.735969	1658	4	0.24208
Znhit1	5	0.9516	0.95184	1	16598	0	0.29674	0.021424	0.067883	0.73627	1659	3	0.29674
Bcat1	5	0.80567	0.81965	1	13559	1	0.36095	0.021448	0.067961	0.736682	1660	3	0.36095
Speer4d	2	0.97855	0.97866	1	17297	0	0.7116	0.021449	0.039631	0.591598	1661	2	0.7116
Gm4745	2	0.97852	0.97862	1	17295	0	0.90002	0.021482	0.039687	0.591961	1662	2	0.90002
Tmem65	5	0.94215	0.94239	1	16345	0	0.43447	0.021517	0.068156	0.736783	1663	3	0.43447
Sdf2	5	0.99182	0.99188	1	17748	0	0.34379	0.02154	0.068223	0.736783	1664	4	0.34379
Cks1b	5	0.89067	0.89115	1	15159	0	0.52627	0.021579	0.068328	0.736783	1665	4	0.52627
Trmt44	5	0.99393	0.99394	1	17834	0	0.24903	0.021597	0.068379	0.736783	1666	4	0.24903
Foxf1	5	0.98223	0.98235	1	17409	0	0.33976	0.021604	0.068398	0.736783	1667	4	0.33976
Lsm5	4	0.22126	0.35823	1	6327	1	0.26557	0.021621	0.063707	0.721965	1668	2	0.26557
Pkp1	5	0.97852	0.97865	1	17296	0	0.32241	0.02163	0.068468	0.736783	1669	3	0.32241
Cyp2d9	5	0.35551	0.52088	1	8131	2	0.028969	0.021636	0.068483	0.736783	1670	2	0.028969
Ap3m2	5	0.49689	0.64349	1	10168	2	0.26863	0.021636	0.068483	0.736783	1671	3	0.26863
Cln6	5	0.87131	0.87194	1	14742	1	0.032849	0.021636	0.068483	0.736783	1672	1	0.032849
Gpn1	5	0.60779	0.71984	1	11550	1	0.53369	0.021636	0.068483	0.736783	1673	4	0.53369
Iqck	5	0.97352	0.97362	1	17153	0	0.33347	0.021662	0.068542	0.736783	1674	4	0.33347
Cbr3	5	0.92551	0.92585	1	15948	0	0.54841	0.021671	0.068569	0.736783	1675	3	0.54841
Atf4	5	0.52775	0.67113	1	10646	1	0.54196	0.02169	0.068611	0.736783	1676	4	0.54196
C330027C09Rik	5	0.98703	0.98709	1	17560	0	0.55425	0.021717	0.068696	0.737272	1677	4	0.55425
Rfwd3	5	0.82009	0.82985	1	13780	1	0.43738	0.021746	0.068773	0.737655	1678	3	0.43738
Rbak	5	0.9044	0.9048	1	15464	0	0.48466	0.021764	0.06882	0.737655	1679	4	0.48466
Mcm6	5	0.83087	0.8378	1	13975	1	0.43596	0.021838	0.069015	0.738302	1680	3	0.43596
Erbb2	5	0.61372	0.72219	1	11598	1	0.35828	0.021861	0.069079	0.738302	1681	4	0.35828
Csnk2a1	3	0.19169	0.30127	1	5698	1	0.022856	0.021888	0.056238	0.689157	1682	1	0.022856
Ubfd1	5	0.97873	0.97885	1	17303	0	0.30349	0.021932	0.069277	0.738302	1683	4	0.30349
Sec11c	5	0.39987	0.55899	1	8730	1	0.37805	0.02194	0.069294	0.738302	1684	4	0.37805
Pdia4	5	0.95147	0.95171	1	16593	0	0.28654	0.021979	0.069399	0.738302	1685	4	0.28654
Nme7	5	0.8797	0.88018	1	14921	1	0.39206	0.021982	0.069407	0.738302	1686	4	0.39206
Ttc13	5	0.24447	0.42802	1	6686	1	0.29495	0.021993	0.06944	0.738302	1687	4	0.29495
Ropn1l	5	0.97694	0.97707	1	17247	0	0.33551	0.02201	0.069488	0.738302	1688	4	0.33551
Bcl2l13	5	0.48316	0.63137	1	9965	1	0.35587	0.022017	0.069504	0.738302	1689	4	0.35587
Spr	5	0.4625	0.61323	1	9650	1	0.2579	0.022026	0.069523	0.738302	1690	4	0.2579
Pold2	5	0.42549	0.58101	1	9122	2	0.19137	0.022046	0.069588	0.738302	1691	2	0.19137
Vbp1	5	0.53729	0.67974	1	10807	1	0.64325	0.022048	0.069599	0.738302	1692	3	0.64325
Smim9	4	0.81553	0.81556	1	13708	1	0.70922	0.022059	0.064623	0.724833	1693	3	0.70922
Sct	5	0.70098	0.76006	1	12322	1	0.55153	0.022064	0.069641	0.738302	1694	3	0.55153
4833423E24Rik	5	0.91934	0.91966	1	15813	0	0.33358	0.022074	0.069667	0.738302	1695	4	0.33358
Poli	5	0.98003	0.98017	1	17343	0	0.28694	0.022079	0.069675	0.738302	1696	4	0.28694
Smoc1	5	0.89812	0.8985	1	15333	0	0.059853	0.02215	0.069848	0.73909	1697	2	0.059853
Fgd6	5	0.96488	0.9651	1	16924	0	0.39339	0.022158	0.069864	0.73909	1698	4	0.39339
Chmp5	5	0.99203	0.99208	1	17753	0	0.59144	0.022205	0.069989	0.73909	1699	3	0.59144
Stk38	5	0.94096	0.9412	1	16315	0	0.36574	0.022217	0.070016	0.73909	1700	3	0.36574
Arhgap32	5	0.99168	0.99176	1	17739	0	0.43672	0.022223	0.070035	0.73909	1701	4	0.43672
Kit	5	0.9588	0.95902	1	16777	0	0.24988	0.02223	0.070057	0.73909	1702	4	0.24988
Myom2	5	0.99034	0.99039	1	17694	0	0.47997	0.022237	0.070077	0.73909	1703	4	0.47997
Sept2	5	0.33696	0.50526	1	7867	1	0.52364	0.022242	0.070088	0.73909	1704	3	0.52364
Arl6ip4	5	0.94327	0.94352	1	16364	0	0.31706	0.022254	0.07011	0.73909	1705	4	0.31706
Shroom3	5	0.91644	0.91673	1	15745	0	0.43943	0.022276	0.070177	0.739369	1706	3	0.43943
Prm3	4	0.98287	0.98296	1	17430	0	0.51852	0.022291	0.065108	0.725511	1707	3	0.51852
Robo1	5	0.90861	0.909	1	15556	0	0.33563	0.022326	0.070308	0.739899	1708	4	0.33563
Zfp707	5	0.98199	0.98213	1	17399	0	0.25889	0.022345	0.070353	0.739958	1709	4	0.25889
Suds3	5	0.99141	0.99149	1	17730	0	0.22272	0.022426	0.070573	0.740613	1710	4	0.22272
Gm5168	2	0.97753	0.97769	1	17268	0	0.67176	0.022471	0.041522	0.605996	1711	2	0.67176
B3gnt6	5	0.98399	0.9841	1	17460	0	0.35864	0.022473	0.070704	0.741122	1712	3	0.35864
Narfl	5	0.44525	0.59821	1	9410	2	0.43835	0.022498	0.070767	0.741343	1713	3	0.43835
Ctdsp2	7	0.084847	0.22401	1	3377	4	-0.20538	0.022528	0.081026	0.774767	1714	2	-0.20538
Gapdhs	5	0.76235	0.79246	1	12954	1	0.36735	0.022537	0.070867	0.741963	1715	3	0.36735
Foxj3	5	0.12244	0.25853	1	4203	3	-0.22563	0.022597	0.071027	0.742251	1716	2	-0.22563
Birc5	5	0.81155	0.82377	1	13645	1	0.77613	0.022597	0.071027	0.742251	1717	4	0.77613
Ube2r2	5	0.97893	0.97906	1	17307	0	0.38429	0.022607	0.071054	0.742251	1718	4	0.38429
Zbtb41	5	0.40315	0.56184	1	8790	1	0.3956	0.022608	0.071055	0.742251	1719	3	0.3956
Dmap1	5	0.77103	0.79758	1	13058	1	0.9184	0.022623	0.071101	0.742302	1720	3	0.9184
Tomt	5	0.94208	0.94233	1	16343	0	0.2686	0.022636	0.071142	0.742308	1721	4	0.2686
Pnpla2	5	0.91569	0.91597	1	15729	0	0.52585	0.02268	0.071246	0.742773	1722	3	0.52585
Enpp7	5	0.84566	0.84936	1	14220	1	0.35375	0.0227	0.071291	0.742773	1723	3	0.35375
Stbd1	5	0.98554	0.98565	1	17516	0	0.41632	0.02271	0.071315	0.742773	1724	4	0.41632
Pgrmc1	5	0.9686	0.96878	1	17025	0	0.24363	0.022735	0.071381	0.742773	1725	4	0.24363
Rnaseh2b	5	0.86008	0.86155	1	14527	1	0.63278	0.022744	0.071406	0.742773	1726	3	0.63278
A830080D01Rik	5	0.96223	0.96244	1	16862	0	0.29791	0.022752	0.071428	0.742773	1727	3	0.29791
Nos1	5	0.22495	0.4098	1	6415	1	0.18641	0.02282	0.071616	0.744241	1728	3	0.18641
Zfp511	5	0.69657	0.75793	1	12283	1	0.28159	0.022836	0.071665	0.744241	1729	4	0.28159
Smarcad1	5	0.98135	0.9815	1	17382	0	0.43655	0.022845	0.071691	0.744241	1730	4	0.43655
Ccng1	5	0.98415	0.98426	1	17467	0	0.32402	0.022877	0.071786	0.744815	1731	4	0.32402
Slc26a5	5	0.98532	0.98543	1	17504	0	0.32121	0.022906	0.071877	0.745338	1732	4	0.32121
Fetub	5	0.82407	0.83269	1	13852	1	0.2878	0.022927	0.071932	0.745487	1733	4	0.2878
Cenpl	5	0.26723	0.44691	1	6971	1	0.67321	0.022982	0.072099	0.746795	1734	4	0.67321
Gtf2a1	5	0.39088	0.55114	1	8607	2	0.51397	0.023009	0.072166	0.747065	1735	3	0.51397
Zfp74	5	0.98883	0.9889	1	17631	0	0.24164	0.023044	0.072271	0.747093	1736	4	0.24164
Fbxl14	5	0.95227	0.95251	1	16609	0	0.31148	0.023066	0.072332	0.747093	1737	4	0.31148
Cabp7	5	0.78124	0.8038	1	13188	1	0.27579	0.023075	0.07235	0.747093	1738	4	0.27579
Txndc11	5	0.38083	0.54256	1	8464	1	0.35406	0.023095	0.072406	0.747093	1739	4	0.35406
Zfp598	5	0.79257	0.81092	1	13347	1	0.46335	0.023128	0.072488	0.747093	1740	3	0.46335
Ascl3	5	0.91157	0.91194	1	15623	0	0.29497	0.02313	0.072493	0.747093	1741	4	0.29497
Ccdc155	5	0.90961	0.91	1	15582	0	0.39618	0.023138	0.072515	0.747093	1742	3	0.39618
Bloc1s4	5	0.99331	0.99333	1	17804	0	0.21962	0.023139	0.072516	0.747093	1743	4	0.21962
Rpl36al	5	0.88847	0.88895	1	15121	0	0.4726	0.023148	0.072534	0.747093	1744	4	0.4726
Skp2	5	0.98559	0.98569	1	17517	0	0.31614	0.023217	0.072705	0.748436	1745	4	0.31614
Uqcr11	3	0.97676	0.97699	1	17234	0	0.23491	0.023244	0.059516	0.706176	1746	3	0.23491
Nfkbiz	5	0.81133	0.82362	1	13641	1	0.45534	0.023279	0.072876	0.74918	1747	4	0.45534
Cacng7	5	0.58491	0.71113	1	11374	1	0.415	0.023314	0.072962	0.74918	1748	3	0.415
Atf6	5	0.98002	0.98016	1	17341	0	0.25664	0.023314	0.072962	0.74918	1749	4	0.25664
Tex21	5	0.54013	0.68233	1	10855	1	0.43768	0.023319	0.072978	0.74918	1750	4	0.43768
Foxn3	5	0.98922	0.98929	1	17649	0	0.35095	0.023328	0.073002	0.74918	1751	4	0.35095
Gas7	5	0.97727	0.97742	1	17260	0	0.29345	0.023344	0.073051	0.74918	1752	4	0.29345
Kctd7	5	0.37694	0.53926	1	8408	1	0.25099	0.023349	0.073062	0.74918	1753	4	0.25099
Rpap3	5	0.71029	0.76464	1	12423	1	0.50679	0.02339	0.073165	0.749815	1754	4	0.50679
Esco2	5	0.90039	0.90077	1	15380	0	-0.049004	0.023448	0.073306	0.750847	1755	2	-0.049004
Igj	5	0.44576	0.59866	1	9420	1	0.49585	0.023516	0.073489	0.752302	1756	3	0.49585
Dync1li1	5	0.9474	0.94764	1	16473	0	0.31178	0.023597	0.073706	0.753963	1757	4	0.31178
1700018B08Rik	5	0.97006	0.97016	1	17059	0	0.32927	0.023613	0.073733	0.753963	1758	4	0.32927
Hbb-bh2	5	0.98142	0.98157	1	17384	0	0.40895	0.023648	0.07383	0.75412	1759	3	0.40895
Clec14a	5	0.92015	0.92048	1	15835	0	0.46393	0.023658	0.073853	0.75412	1760	3	0.46393
Sec61a1	5	0.94548	0.94574	1	16421	0	0.15321	0.023667	0.073871	0.75412	1761	2	0.15321
Speer4a	1	0.97632	0.9764	1	17224	0	1.8036	0.023682	0.023608	0.457389	1762	1	1.8036
Ostn	5	0.46906	0.61893	1	9745	1	0.14462	0.023684	0.073917	0.754168	1763	2	0.14462
Fyb	5	0.89286	0.89329	1	15217	0	-0.0087103	0.023722	0.074006	0.754249	1764	1	-0.0087103
Prmt10	5	0.95237	0.95261	1	16613	0	0.36027	0.023723	0.074007	0.754249	1765	3	0.36027
Wtap	4	0.80897	0.80908	1	13610	1	0.72998	0.023741	0.068152	0.736783	1766	3	0.72998
Gimap7	5	0.52014	0.66427	1	10530	2	0.19238	0.023777	0.074152	0.754644	1767	3	0.19238
Upk1b	5	0.55839	0.69893	1	11148	1	0.5172	0.023782	0.074163	0.754644	1768	3	0.5172
Zfp566	5	0.80058	0.81617	1	13482	1	0.3469	0.023783	0.074169	0.754644	1769	4	0.3469
1700029F12Rik	5	0.27927	0.45692	1	7129	2	-0.083873	0.02384	0.074312	0.755266	1770	2	-0.083873
Pex11a	5	0.81088	0.82328	1	13633	1	0.36141	0.023866	0.074377	0.755505	1771	4	0.36141
Sgsm1	5	0.98362	0.98374	1	17450	0	0.25828	0.023898	0.074465	0.755666	1772	4	0.25828
Ubxn4	5	0.99147	0.99156	1	17731	0	0.42128	0.023903	0.074474	0.755666	1773	3	0.42128
C130060K24Rik	5	0.58739	0.71206	1	11393	1	0.16718	0.023968	0.074647	0.756215	1774	3	0.16718
Slc6a1	5	0.85209	0.85468	1	14345	1	0.39793	0.023969	0.07465	0.756215	1775	3	0.39793
Cyct	5	0.79621	0.8133	1	13406	1	0.17755	0.023998	0.074717	0.756215	1776	2	0.17755
4933402P03Rik	5	0.65467	0.73898	1	11915	1	0.26951	0.024017	0.07476	0.756215	1777	4	0.26951
Dpp6	5	0.95114	0.95139	1	16582	0	0.15494	0.024017	0.074761	0.756215	1778	2	0.15494
Rabggtb	5	0.15077	0.30208	1	4851	3	-0.48683	0.024023	0.074775	0.756215	1779	1	-0.48683
Rbfox3	5	0.96315	0.96337	1	16885	0	0.2821	0.02406	0.074879	0.756852	1780	4	0.2821
Gm5169	1	0.97593	0.97603	1	17213	0	1.0919	0.024073	0.023983	0.460216	1781	1	1.0919
Ifitm1	4	0.53977	0.62651	1	10848	1	0.15895	0.024082	0.068852	0.737655	1782	2	0.15895
Tmem106a	5	0.91672	0.91702	1	15753	0	0.42325	0.024092	0.074966	0.757203	1783	4	0.42325
Fancm	5	0.98093	0.98108	1	17374	0	0.48773	0.024131	0.07506	0.757203	1784	4	0.48773
Pramel7	5	0.70323	0.76116	1	12342	1	0.4529	0.024138	0.075079	0.757203	1785	4	0.4529
Aldh18a1	5	0.62424	0.72633	1	11675	1	0.47666	0.024138	0.075079	0.757203	1786	4	0.47666
Rps27l	2	0.97586	0.97603	1	17211	0	0.55098	0.024144	0.044512	0.622555	1787	2	0.55098
Hmgn1	3	0.68836	0.68947	1	12204	1	0.063461	0.024166	0.061702	0.713774	1788	1	0.063461
Edem2	5	0.88086	0.88134	1	14943	0	0.56049	0.024167	0.075169	0.7577	1789	4	0.56049
Uap1	5	0.41836	0.57489	1	9028	1	0.49441	0.024192	0.075248	0.757778	1790	4	0.49441
Atad3a	5	0.6325	0.72968	1	11731	1	0.53908	0.024205	0.075286	0.757778	1791	3	0.53908
P2rx7	5	0.63011	0.7287	1	11714	1	0.50317	0.024209	0.0753	0.757778	1792	4	0.50317
1500009L16Rik	3	0.18906	0.2978	1	5649	2	-0.27696	0.024232	0.061853	0.713774	1793	1	-0.27696
Ranbp9	4	0.87604	0.87617	1	14843	0	0.41378	0.024266	0.069244	0.738302	1794	3	0.41378
Rab2a	5	0.97302	0.9731	1	17142	0	0.37745	0.024299	0.075524	0.758288	1795	4	0.37745
Krt6a	3	0.9757	0.97592	1	17206	0	0.27861	0.024302	0.062017	0.714001	1796	3	0.27861
Kctd2	5	0.98482	0.98494	1	17490	0	0.26456	0.02432	0.075571	0.758288	1797	4	0.26456
Nle1	5	0.32623	0.49614	1	7738	1	0.041953	0.024325	0.075584	0.758288	1798	1	0.041953
Ptp4a2	5	0.88049	0.88098	1	14937	0	0.4409	0.024358	0.075671	0.758288	1799	4	0.4409
Abra	5	0.38902	0.54954	1	8580	2	0.25583	0.024363	0.075687	0.758288	1800	3	0.25583
Bean1	5	0.93486	0.93514	1	16172	0	0.38106	0.024381	0.075738	0.758288	1801	3	0.38106
Hamp2	3	0.97226	0.97247	1	17118	0	0.46037	0.024389	0.062229	0.71497	1802	3	0.46037
Sv2c	5	0.22008	0.40284	1	6292	1	0.29583	0.024399	0.075791	0.758288	1803	4	0.29583
4930563D23Rik	5	0.72417	0.77162	1	12553	1	0.31574	0.024403	0.0758	0.758288	1804	3	0.31574
Fam150b	5	0.99249	0.99256	1	17765	0	0.3331	0.024406	0.075813	0.758288	1805	4	0.3331
Tub	5	0.85909	0.86064	1	14505	1	0.35862	0.024428	0.075859	0.758288	1806	4	0.35862
Vmn1r74	5	0.47356	0.62291	1	9804	1	0.50595	0.024432	0.075875	0.758288	1807	3	0.50595
Chrdl2	5	0.5064	0.652	1	10309	1	0.12649	0.024433	0.075876	0.758288	1808	2	0.12649
Cldn16	5	0.9107	0.91108	1	15607	0	0.46033	0.024437	0.075887	0.758288	1809	4	0.46033
Gjb6	4	0.52921	0.62129	1	10673	1	0.45654	0.024458	0.069625	0.738302	1810	3	0.45654
Papd4	5	0.89784	0.89824	1	15327	0	-0.086822	0.024489	0.076021	0.75922	1811	1	-0.086822
1600029D21Rik	5	0.97465	0.97477	1	17181	0	0.43016	0.024526	0.076126	0.75954	1812	4	0.43016
Hypk	5	0.99172	0.99179	1	17741	0	0.29999	0.024532	0.076136	0.75954	1813	4	0.29999
Igfbp7	5	0.18772	0.35671	1	5611	1	0.27703	0.024565	0.076228	0.760051	1814	4	0.27703
Dpep3	5	0.96568	0.96588	1	16941	0	0.58729	0.024619	0.076365	0.761001	1815	3	0.58729
Marveld3	5	0.98899	0.98906	1	17637	0	0.41549	0.024638	0.076418	0.76112	1816	4	0.41549
Fam126a	5	0.96721	0.9674	1	16986	0	0.39952	0.024671	0.076507	0.761433	1817	4	0.39952
Izumo2	5	0.98149	0.98163	1	17386	0	0.44958	0.024691	0.07656	0.761433	1818	4	0.44958
Bdkrb2	5	0.9555	0.95577	1	16684	0	0.2437	0.024717	0.076625	0.761433	1819	4	0.2437
Gnb1	5	0.96664	0.96683	1	16967	0	0.40374	0.024727	0.076648	0.761433	1820	4	0.40374
Aifm1	5	0.91531	0.91559	1	15720	0	0.55128	0.024731	0.076656	0.761433	1821	3	0.55128
Mllt3	10	0.90758	0.95543	1	15526	1	0.26161	0.024744	0.10202	0.83787	1822	7	0.26161
Ralgapa1	5	0.99289	0.99292	1	17787	0	0.4054	0.024749	0.076706	0.761519	1823	4	0.4054
Sh3pxd2a	5	0.4993	0.64565	1	10208	2	0.13609	0.024851	0.076967	0.763408	1824	3	0.13609
Anxa8	5	0.8554	0.8575	1	14439	1	0.52689	0.024854	0.07698	0.763408	1825	3	0.52689
Myh11	5	0.59761	0.71598	1	11471	1	0.031939	0.024881	0.077057	0.763765	1826	2	0.031939
Vezt	4	0.96508	0.9652	1	16928	0	0.53615	0.024893	0.070517	0.740613	1827	3	0.53615
Cdca4	5	0.9263	0.92662	1	15965	0	0.19386	0.024927	0.077174	0.764262	1828	3	0.19386
Rnf144a	5	0.99256	0.99262	1	17771	0	0.2892	0.024942	0.07721	0.764262	1829	4	0.2892
Diap2	5	0.96755	0.96773	1	16996	0	0.46883	0.024955	0.077239	0.764262	1830	4	0.46883
Rbbp8	5	0.29504	0.47007	1	7339	1	0.80299	0.024968	0.077273	0.764262	1831	4	0.80299
Pigr	4	0.22747	0.36477	1	6468	2	0.17928	0.024984	0.070706	0.741122	1832	2	0.17928
Acmsd	5	0.58593	0.71149	1	11383	1	0.32536	0.024997	0.07735	0.764612	1833	4	0.32536
Ntpcr	5	0.32384	0.49414	1	7700	1	0.48138	0.025017	0.077411	0.764802	1834	3	0.48138
Cc2d1a	5	0.84167	0.84618	1	14154	1	0.34561	0.025041	0.077476	0.765035	1835	4	0.34561
Asic1	5	0.65546	0.73931	1	11923	1	0.51947	0.025067	0.077542	0.765278	1836	3	0.51947
Txlna	5	0.80267	0.81758	1	13518	1	0.3114	0.025091	0.077591	0.76535	1837	4	0.3114
Prdm4	5	0.97239	0.9725	1	17126	0	0.41491	0.025119	0.077674	0.765662	1838	4	0.41491
Gm7361	2	0.97487	0.97503	1	17184	0	1.1136	0.025135	0.046279	0.631622	1839	2	1.1136
Tdgf1	5	0.82952	0.83676	1	13951	1	0.24046	0.025156	0.077771	0.765662	1840	4	0.24046
Deptor	5	0.96599	0.96616	1	16947	0	0.39041	0.025161	0.077785	0.765662	1841	4	0.39041
Wwc2	5	0.79231	0.81075	1	13342	1	0.053413	0.025172	0.077811	0.765662	1842	2	0.053413
Gimap6	5	0.91373	0.91406	1	15677	0	0.60935	0.025192	0.077864	0.765662	1843	3	0.60935
Plxna4	5	0.31435	0.48619	1	7572	1	0.22868	0.025194	0.077873	0.765662	1844	4	0.22868
Macc1	5	0.58527	0.71125	1	11378	1	-0.038622	0.025212	0.077914	0.765662	1845	2	-0.038622
Gm5591	3	0.78073	0.78085	1	13181	0	0.77477	0.025234	0.064279	0.724472	1846	2	0.77477
Cntnap2	10	0.88403	0.94281	1	15006	2	0.15715	0.025251	0.10375	0.838782	1847	5	0.15715
Lrp10	5	0.67768	0.74911	1	12116	1	0.26354	0.025266	0.078053	0.765904	1848	4	0.26354
Mamld1	5	0.78116	0.80375	1	13187	1	0.41405	0.025282	0.078098	0.765904	1849	3	0.41405
Ccdc11	5	0.82352	0.83231	1	13839	1	0.40676	0.025318	0.078207	0.765904	1850	4	0.40676
Ddx51	5	0.97992	0.98006	1	17335	0	0.36355	0.025334	0.078244	0.765904	1851	4	0.36355
Mr1	5	0.81017	0.82278	1	13621	1	0.26136	0.025351	0.078289	0.765904	1852	4	0.26136
Tat	5	0.99377	0.99378	1	17827	0	0.297	0.025351	0.078289	0.765904	1853	4	0.297
Aass	5	0.42485	0.58044	1	9109	1	0.28321	0.025358	0.078313	0.765904	1854	4	0.28321
Gprc5b	5	0.93893	0.93918	1	16259	0	0.40695	0.025393	0.078425	0.766591	1855	3	0.40695
Fblim1	5	0.70462	0.76187	1	12354	1	0.27358	0.025423	0.0785	0.766822	1856	4	0.27358
Setdb1	5	0.98813	0.98817	1	17606	0	0.35478	0.025434	0.078532	0.766822	1857	4	0.35478
Hmgb1	1	0.97455	0.97462	1	17175	0	1.0592	0.025448	0.025372	0.475081	1858	1	1.0592
Cers1	5	0.97527	0.97541	1	17193	0	0.3701	0.025474	0.078645	0.767439	1859	3	0.3701
Bcat2	5	0.87629	0.8768	1	14848	1	0.4743	0.025495	0.078711	0.767439	1860	3	0.4743
Ankrd27	5	0.58219	0.71013	1	11358	1	0.30995	0.025512	0.07876	0.767439	1861	4	0.30995
Adcy5	5	0.9498	0.95005	1	16543	0	0.22971	0.025525	0.078797	0.767439	1862	4	0.22971
Vmn2r24	5	0.94751	0.94776	1	16478	0	0.55063	0.025538	0.078824	0.767439	1863	4	0.55063
Slc38a9	5	0.62378	0.72614	1	11671	1	0.38062	0.025556	0.078873	0.767439	1864	4	0.38062
Cep170b	5	0.50719	0.65275	1	10324	2	-0.022151	0.025575	0.078927	0.767439	1865	2	-0.022151
Jazf1	5	0.50571	0.65142	1	10298	1	0.24683	0.025586	0.078957	0.767439	1866	4	0.24683
Cbr1	5	0.5367	0.67921	1	10796	1	0.45494	0.02559	0.07897	0.767439	1867	4	0.45494
Sbds	5	0.69165	0.75566	1	12237	1	0.45055	0.025616	0.079036	0.767672	1868	3	0.45055
Smc1a	5	0.47289	0.62234	1	9792	1	0.57269	0.025654	0.079137	0.768243	1869	3	0.57269
Mdfic	5	0.53827	0.68062	1	10826	1	0.4358	0.025684	0.079214	0.768258	1870	3	0.4358
Adam8	5	0.42142	0.5775	1	9062	1	0.22905	0.025686	0.079222	0.768258	1871	4	0.22905
Ddx6	5	0.52594	0.66952	1	10621	1	0.55364	0.025709	0.079289	0.768335	1872	4	0.55364
Ctns	5	0.17406	0.33675	1	5352	3	-0.28395	0.025717	0.079313	0.768335	1873	2	-0.28395
2210404O09Rik	3	0.80628	0.80622	1	13569	0	0.57556	0.025725	0.065425	0.726597	1874	2	0.57556
Triml2	5	0.98812	0.98816	1	17603	0	0.53586	0.025858	0.079637	0.770596	1875	4	0.53586
Rnf113a1	5	0.95849	0.95869	1	16769	0	0.62708	0.025871	0.079675	0.770596	1876	3	0.62708
Gm15800	5	0.93032	0.93062	1	16058	0	0.36738	0.02588	0.079706	0.770596	1877	4	0.36738
Vmn2r13	5	0.75984	0.79096	1	12922	1	0.38066	0.02589	0.079725	0.770596	1878	4	0.38066
Tmem208	5	0.93437	0.93462	1	16157	0	0.4232	0.025901	0.079756	0.770596	1879	4	0.4232
Vmn2r65	5	0.82613	0.83424	1	13884	1	0.49919	0.025948	0.079882	0.771086	1880	4	0.49919
Gstt2	5	0.21655	0.39787	1	6205	1	0.21221	0.025951	0.07989	0.771086	1881	3	0.21221
Dtwd1	5	0.56961	0.7056	1	11278	1	0.28927	0.025992	0.080004	0.77153	1882	3	0.28927
Neu3	5	0.69255	0.75605	1	12248	1	0.39521	0.026015	0.080073	0.77153	1883	4	0.39521
Chrnb3	5	0.67608	0.74841	1	12097	1	0.47062	0.026027	0.080106	0.77153	1884	4	0.47062
Cd274	5	0.98524	0.98535	1	17497	0	0.35267	0.026057	0.080179	0.77153	1885	4	0.35267
Lrrc8e	5	0.93866	0.9389	1	16256	0	0.42281	0.026066	0.080203	0.77153	1886	4	0.42281
Phf23	5	0.99117	0.99125	1	17725	0	0.17633	0.026077	0.080233	0.77153	1887	3	0.17633
4933434I20Rik	5	0.97578	0.97594	1	17208	0	0.35	0.026085	0.080256	0.77153	1888	4	0.35
Actr10	5	0.47167	0.62125	1	9778	1	0.56643	0.026091	0.080272	0.77153	1889	4	0.56643
Clcn3	5	0.99054	0.9906	1	17702	0	0.41758	0.026124	0.080362	0.771763	1890	4	0.41758
Sval1	5	0.8286	0.83607	1	13927	1	-0.023889	0.026132	0.08038	0.771763	1891	1	-0.023889
Cml1	5	0.94605	0.94631	1	16437	0	0.48851	0.026161	0.080462	0.772151	1892	3	0.48851
2410124H12Rik	5	0.81701	0.82769	1	13732	1	0.25612	0.026216	0.080617	0.773234	1893	3	0.25612
Ftl1	2	0.97376	0.97392	1	17157	0	0.6708	0.026238	0.048217	0.64638	1894	2	0.6708
Kdm5a	5	0.99116	0.99124	1	17724	0	0.35858	0.026289	0.080807	0.774652	1895	4	0.35858
Chrna3	5	0.91986	0.9202	1	15831	0	0.39791	0.026307	0.080856	0.774723	1896	3	0.39791
Mc4r	5	0.88763	0.88811	1	15104	0	0.20106	0.02635	0.080976	0.774767	1897	2	0.20106
Tfpt	5	0.97811	0.97826	1	17286	0	0.23595	0.026363	0.081012	0.774767	1898	4	0.23595
Usp37	5	0.87861	0.87909	1	14896	1	0.39742	0.02638	0.08106	0.774767	1899	4	0.39742
9530068E07Rik	5	0.9899	0.98996	1	17675	0	0.25868	0.026385	0.081074	0.774767	1900	4	0.25868
Spon1	5	0.85929	0.86085	1	14512	1	0.26898	0.026401	0.081114	0.774767	1901	3	0.26898
Gulo	5	0.91473	0.91505	1	15705	0	0.45056	0.026448	0.081245	0.775272	1902	3	0.45056
Mmp28	5	0.93236	0.93265	1	16106	0	0.35153	0.026452	0.081251	0.775272	1903	4	0.35153
Myo1b	5	0.38148	0.54312	1	8471	2	0.15558	0.026488	0.081351	0.775428	1904	3	0.15558
Zbtb7b	5	0.9784	0.97853	1	17293	0	0.33034	0.026513	0.081414	0.775468	1905	4	0.33034
Ccdc178	5	0.29128	0.46688	1	7294	2	0.052455	0.026542	0.081507	0.775468	1906	2	0.052455
Syce3	5	0.9844	0.98452	1	17472	0	0.45945	0.026543	0.08151	0.775468	1907	4	0.45945
Mppe1	5	0.95501	0.95526	1	16673	0	0.44106	0.026552	0.081524	0.775468	1908	3	0.44106
Ttll13	5	0.52118	0.66522	1	10552	1	0.23315	0.026587	0.081621	0.775577	1909	4	0.23315
Pradc1	5	0.45652	0.60811	1	9569	1	0.32731	0.026625	0.081738	0.775577	1910	4	0.32731
Rnf34	5	0.48127	0.62968	1	9932	2	0.20281	0.026627	0.081746	0.775577	1911	3	0.20281
Fhl3	5	0.95244	0.95267	1	16616	0	0.3906	0.026644	0.081793	0.775626	1912	3	0.3906
Eif4a3	4	0.56628	0.64002	1	11246	1	0.8319	0.02668	0.07421	0.754644	1913	3	0.8319
Klrb1	5	0.8288	0.83622	1	13932	1	0.49545	0.026686	0.081905	0.775936	1914	4	0.49545
Saa4	5	0.82618	0.83428	1	13885	1	0.54005	0.026699	0.08195	0.775936	1915	3	0.54005
Plagl2	5	0.36855	0.53199	1	8305	1	0.29413	0.026728	0.082038	0.775936	1916	4	0.29413
Eps15l1	5	0.98732	0.98736	1	17574	0	0.33105	0.026736	0.082068	0.775936	1917	4	0.33105
Appl2	5	0.96055	0.96072	1	16814	0	0.41615	0.026736	0.082068	0.775936	1918	4	0.41615
Vps26b	5	0.88171	0.88219	1	14972	0	0.5092	0.02674	0.082079	0.775936	1919	3	0.5092
Cpa1	5	0.9809	0.98106	1	17372	0	0.31294	0.026795	0.082215	0.776824	1920	4	0.31294
Ppm1a	5	0.89611	0.89657	1	15287	0	0.30039	0.026828	0.082314	0.776961	1921	3	0.30039
Gucy2c	5	0.81829	0.82857	1	13759	1	0.37046	0.026858	0.082381	0.777192	1922	3	0.37046
5031414D18Rik	5	0.78334	0.80515	1	13217	1	0.43195	0.026893	0.082479	0.777722	1923	4	0.43195
Tepp	8	0.53969	0.74598	1	10847	3	0.30079	0.026927	0.10229	0.838227	1924	5	0.30079
Dmrtc1c1	5	0.91894	0.91927	1	15805	0	0.32634	0.02694	0.082603	0.77849	1925	3	0.32634
Ube2d3	3	0.973	0.97318	1	17141	0	0.50896	0.026995	0.068417	0.736783	1926	3	0.50896
Gstz1	5	0.90864	0.90902	1	15558	0	0.31776	0.027009	0.082793	0.779176	1927	4	0.31776
Nsfl1c	5	0.95086	0.95111	1	16569	0	0.4468	0.027041	0.082877	0.779176	1928	3	0.4468
Fam60a	3	0.87848	0.87857	1	14890	0	0.22802	0.027067	0.068578	0.736783	1929	2	0.22802
Asphd2	5	0.96103	0.96119	1	16822	0	0.47341	0.027091	0.083008	0.779176	1930	4	0.47341
Notch2	5	0.50117	0.6473	1	10228	1	0.23808	0.027094	0.083018	0.779176	1931	4	0.23808
Itgb1	5	0.95099	0.95125	1	16577	0	0.36682	0.027113	0.083074	0.779176	1932	4	0.36682
Snrpd1	5	0.15866	0.31402	1	5022	3	-0.54699	0.027171	0.083231	0.779176	1933	1	-0.54699
Agtr1a	5	0.97469	0.97482	1	17182	0	0.17195	0.027171	0.083231	0.779176	1934	3	0.17195
Fam154b	5	0.9492	0.94947	1	16527	0	0.20505	0.027171	0.083231	0.779176	1935	4	0.20505
Mzt1	5	0.4036	0.56223	1	8799	2	0.012021	0.027171	0.083231	0.779176	1936	2	0.012021
Xpo1	5	0.51256	0.65751	1	10408	2	0.23026	0.027171	0.083231	0.779176	1937	3	0.23026
Kcns3	5	0.72529	0.77219	1	12562	1	-0.046869	0.027171	0.083231	0.779176	1938	1	-0.046869
Syncrip	5	0.86629	0.86724	1	14640	1	0.36058	0.027171	0.083231	0.779176	1939	3	0.36058
Dido1	5	0.54311	0.68503	1	10897	1	0.22039	0.027176	0.083237	0.779176	1940	3	0.22039
Pno1	5	0.65362	0.73853	1	11903	1	0.6621	0.027189	0.083268	0.779176	1941	4	0.6621
Gm19345	5	0.78151	0.80398	1	13192	1	0.38115	0.027215	0.083345	0.779499	1942	3	0.38115
Chid1	5	0.88252	0.88301	1	14984	0	0.48037	0.027309	0.08357	0.7812	1943	3	0.48037
Optc	5	0.94653	0.94678	1	16451	0	0.44172	0.027334	0.083644	0.781497	1944	4	0.44172
Gtpbp6	5	0.98498	0.9851	1	17493	0	0.20088	0.027354	0.083692	0.781548	1945	4	0.20088
Cd209c	5	0.23797	0.42266	1	6603	1	0.39289	0.027424	0.083869	0.782803	1946	4	0.39289
Rasal1	5	0.98355	0.98366	1	17447	0	0.36238	0.027492	0.084039	0.783997	1947	4	0.36238
Cabs1	5	0.85097	0.85375	1	14333	1	0.33479	0.027603	0.084341	0.785832	1948	4	0.33479
Adam17	5	0.37568	0.53819	1	8390	2	0.047071	0.027608	0.084353	0.785832	1949	2	0.047071
Cnih	5	0.92801	0.92832	1	16014	0	0.39889	0.027617	0.084374	0.785832	1950	4	0.39889
Vrk1	5	0.77719	0.80133	1	13136	1	0.40978	0.027631	0.084407	0.785832	1951	4	0.40978
Slc41a3	5	0.98769	0.98774	1	17587	0	0.25862	0.02767	0.084512	0.78641	1952	4	0.25862
Mtif3	5	0.51768	0.66203	1	10487	2	-0.030209	0.027803	0.084843	0.788577	1953	2	-0.030209
Dzip3	5	0.91712	0.91744	1	15761	0	0.31628	0.027823	0.084904	0.788577	1954	4	0.31628
Pla2g15	5	0.72002	0.76949	1	12519	1	0.38344	0.027833	0.084926	0.788577	1955	3	0.38344
Acot2	5	0.93236	0.93264	1	16105	0	0.21506	0.027855	0.084978	0.788577	1956	4	0.21506
Ube2cbp	5	0.99417	0.99418	1	17845	0	0.314	0.027887	0.085056	0.788577	1957	4	0.314
Cox18	5	0.93809	0.93833	1	16239	0	0.40362	0.027889	0.085062	0.788577	1958	3	0.40362
Ccdc28a	5	0.80468	0.81894	1	13549	1	0.035313	0.027897	0.085087	0.788577	1959	2	0.035313
Alg11	5	0.98705	0.98711	1	17561	0	0.34495	0.027918	0.085145	0.788713	1960	4	0.34495
Lmod3	5	0.93764	0.93789	1	16225	0	0.36738	0.027975	0.08529	0.789666	1961	4	0.36738
Tmem41a	5	0.46795	0.61797	1	9723	1	0.1982	0.027997	0.085347	0.789792	1962	4	0.1982
Spn	5	0.97093	0.97106	1	17082	0	0.22375	0.028036	0.085457	0.789805	1963	4	0.22375
Sst	5	0.96187	0.96207	1	16853	0	0.27364	0.028052	0.085496	0.789805	1964	4	0.27364
Akr1b10	5	0.96957	0.96969	1	17044	0	0.49539	0.028055	0.085502	0.789805	1965	4	0.49539
Tonsl	5	0.50835	0.65374	1	10345	1	0.70061	0.028084	0.08558	0.789805	1966	4	0.70061
Ppfia3	5	0.91706	0.91738	1	15759	0	0.31663	0.028097	0.085616	0.789805	1967	3	0.31663
Clec4n	5	0.36132	0.52586	1	8203	1	0.16608	0.0281	0.085628	0.789805	1968	2	0.16608
Stx5a	5	0.9253	0.92564	1	15945	0	0.533	0.028203	0.085909	0.791656	1969	3	0.533
Magea4	5	0.79907	0.81519	1	13452	1	0.14106	0.028214	0.085935	0.791656	1970	2	0.14106
Tatdn3	5	0.42613	0.58157	1	9133	1	0.49648	0.028267	0.086068	0.792483	1971	4	0.49648
Ino80e	5	0.46626	0.6165	1	9699	1	0.089093	0.028298	0.086148	0.79272	1972	2	0.089093
Bicc1	5	0.9887	0.98876	1	17626	0	0.25791	0.02831	0.08618	0.79272	1973	4	0.25791
Scgb2b7	2	0.97165	0.9718	1	17104	0	0.83573	0.028347	0.051951	0.666324	1974	2	0.83573
Cln8	5	0.8702	0.87084	1	14722	1	0.40573	0.028393	0.086391	0.793771	1975	4	0.40573
Pdf	5	0.97502	0.97515	1	17187	0	0.1916	0.028398	0.086409	0.793771	1976	4	0.1916
Klhl8	5	0.28116	0.45849	1	7156	1	0.21677	0.028404	0.086425	0.793771	1977	3	0.21677
Whsc1l1	5	0.1706	0.33169	1	5279	2	0.50418	0.028419	0.086467	0.793771	1978	3	0.50418
Lcorl	5	0.90839	0.90877	1	15548	0	0.21881	0.028483	0.086614	0.79435	1979	3	0.21881
Efr3b	5	0.62399	0.72624	1	11673	1	0.33669	0.028527	0.08673	0.79435	1980	3	0.33669
Tom1l1	5	0.81225	0.82427	1	13660	1	0.2893	0.028542	0.086762	0.79435	1981	3	0.2893
Lphn1	5	0.91575	0.91603	1	15732	0	0.21512	0.028562	0.086814	0.79435	1982	4	0.21512
Capn8	5	0.99415	0.99416	1	17843	0	0.29151	0.02857	0.086832	0.79435	1983	4	0.29151
Nkx6-3	5	0.66365	0.74287	1	11999	1	0.30736	0.028598	0.086909	0.794395	1984	4	0.30736
Zcchc9	5	0.88906	0.88956	1	15130	0	0.70384	0.028621	0.086974	0.794395	1985	4	0.70384
Asic4	5	0.96841	0.96858	1	17017	0	0.37221	0.028627	0.086988	0.794395	1986	4	0.37221
Vmn2r72	5	0.90546	0.90585	1	15481	0	0.48885	0.028681	0.087131	0.794572	1987	4	0.48885
Phyhipl	5	0.93803	0.93827	1	16235	0	0.48665	0.028681	0.087131	0.794572	1988	4	0.48665
Cdk1	5	0.50516	0.65096	1	10287	1	0.76288	0.028701	0.08718	0.794572	1989	3	0.76288
Tm7sf3	5	0.95569	0.95594	1	16690	0	0.26289	0.028711	0.087202	0.794572	1990	4	0.26289
Cpn2	5	0.96973	0.96983	1	17047	0	0.30506	0.028771	0.087379	0.795008	1991	4	0.30506
Cngb1	5	0.064865	0.16656	1	2988	2	-0.2009	0.028797	0.087436	0.795129	1992	2	-0.2009
Brd4	5	0.62676	0.72734	1	11689	1	0.64057	0.028826	0.087501	0.795333	1993	3	0.64057
Hspa5	5	0.6337	0.7302	1	11744	1	0.044765	0.028865	0.087611	0.795937	1994	2	0.044765
Slc46a3	5	0.82936	0.83665	1	13945	1	0.052639	0.028893	0.087681	0.79618	1995	2	0.052639
Mal	8	0.14525	0.34104	1	4709	3	0.020796	0.028915	0.10738	0.846342	1996	2	0.020796
Figf	5	0.82357	0.83234	1	13840	1	0.38625	0.028932	0.087796	0.796827	1997	3	0.38625
Spata24	5	0.92623	0.92654	1	15963	0	0.29906	0.028994	0.087952	0.797854	1998	4	0.29906
[truncated: 16,408 more rows]

## Sheet: Table2 Genome wide
Supplementary Table 2, genome-wide CRISPR screen data
id	num	neg|score	neg|p-value	neg|fdr	neg|rank	neg|goodsgrna	neg|lfc	pos|score	pos|p-value	pos|fdr	pos|rank	pos|goodsgrna	pos|lfc
Tada2b	5	1	1	1	18406	0	4.0852	5.2198e-15	2.6896e-07	5.4e-05	1	5	4.0852
Fgfr2	5	1	1	1	18405	0	5.1142	1.0619e-14	2.6896e-07	5.4e-05	2	5	5.1142
Slc33a1	5	1	1	1	18404	0	3.3496	3.0302e-13	2.6896e-07	5.4e-05	3	5	3.3496
Med25	5	1	1	1	18403	0	2.7024	3.4276e-13	2.6896e-07	5.4e-05	4	5	2.7024
Cnot2	10	1	1	1	18337	0	1.9737	8.5982e-13	2.6896e-07	5.4e-05	5	10	1.9737
Mrgbp	5	1	1	1	18400	0	4.1932	5.9607e-12	2.6896e-07	5.4e-05	6	5	4.1932
Hspa14	5	1	1	1	18402	0	2.6075	7.3322e-12	2.6896e-07	5.4e-05	7	5	2.6075
Nfkb2	5	1	1	1	18401	0	2.3793	7.9756e-12	2.6896e-07	5.4e-05	8	5	2.3793
Prep	5	1	1	1	18399	0	3.0322	1.1603e-11	2.6896e-07	5.4e-05	9	5	3.0322
Traf3	5	0.99986	0.99987	1	18152	0	4.1747	1.1626e-11	2.6896e-07	5.4e-05	10	5	4.1747
Taf6l	5	1	1	1	18398	0	2.9544	1.6709e-11	2.6896e-07	5.4e-05	11	5	2.9544
Ccdc101	5	1	1	1	18397	0	3.4455	2.0482e-11	2.6896e-07	5.4e-05	12	5	3.4455
Pa2g4	5	1	1	1	18396	0	3.1582	3.0499e-11	2.6896e-07	5.4e-05	13	5	3.1582
Kat6a	5	1	1	1	18395	0	2.513	4.7081e-11	2.6896e-07	5.4e-05	14	5	2.513
Taf5l	5	1	1	1	18394	0	2.7223	7.5401e-11	2.6896e-07	5.4e-05	15	5	2.7223
Srrd	5	1	1	1	18393	0	3.2083	1.1658e-10	2.6896e-07	5.4e-05	16	5	3.2083
Shoc2	5	1	1	1	18392	0	2.9338	1.5102e-10	2.6896e-07	5.4e-05	17	5	2.9338
Tada1	5	1	1	1	18385	0	3.1257	1.8416e-10	2.6896e-07	5.4e-05	18	5	3.1257
Ago2	5	1	1	1	18391	0	2.0424	4.6874e-10	2.6896e-07	5.4e-05	19	5	2.0424
Zfp706	5	1	1	1	18390	0	1.9752	4.883e-10	2.6896e-07	5.4e-05	20	5	1.9752
Ep300	5	1	1	1	18389	0	2.1	5.0237e-10	2.6896e-07	5.4e-05	21	5	2.1
Med24	5	1	1	1	18388	0	2.5837	5.8913e-10	2.6896e-07	5.4e-05	22	5	2.5837
Surf4	5	1	1	1	18387	0	4.4725	6.901e-10	2.6896e-07	5.4e-05	23	5	4.4725
Rfx5	5	1	1	1	18368	0	2.9354	7.7123e-10	2.6896e-07	5.4e-05	24	5	2.9354
Supt20	5	1	1	1	18386	0	2.3922	8.8771e-10	2.6896e-07	5.4e-05	25	5	2.3922
Pphln1	5	1	1	1	18384	0	2.3468	1.6939e-09	2.6896e-07	5.4e-05	26	5	2.3468
Dnajc2	5	0.93818	0.93842	1	15813	0	2.5914	1.718e-09	2.6896e-07	5.4e-05	27	4	2.5914
Rest	5	1	1	1	18383	0	1.6862	1.8042e-09	2.6896e-07	5.4e-05	28	5	1.6862
Runx1	5	1	1	1	18382	0	1.5101	1.8789e-09	2.6896e-07	5.4e-05	29	5	1.5101
Prrc2a	5	1	1	1	18381	0	1.3563	2.2229e-09	2.6896e-07	5.4e-05	30	5	1.3563
Brpf1	5	0.99999	0.99999	1	18253	0	2.3641	2.3402e-09	2.6896e-07	5.4e-05	31	5	2.3641
Ptpn11	5	1	1	1	18380	0	1.9828	3.1578e-09	2.6896e-07	5.4e-05	32	5	1.9828
Med20	5	1	1	1	18379	0	2.2028	3.2428e-09	2.6896e-07	5.4e-05	33	5	2.2028
Kdm2a	5	1	1	1	18378	0	1.6676	3.4229e-09	2.6896e-07	5.4e-05	34	5	1.6676
Tmem165	5	0.98723	0.98728	1	17286	0	3.8868	3.7436e-09	2.6896e-07	5.4e-05	35	4	3.8868
Tm9sf2	5	0.99982	0.99982	1	18141	0	2.3035	3.8416e-09	2.6896e-07	5.4e-05	36	5	2.3035
Whsc1	5	1	1	1	18377	0	2.4141	4.2419e-09	2.6896e-07	5.4e-05	37	5	2.4141
Chmp5	5	1	1	1	18376	0	1.8391	4.2926e-09	2.6896e-07	5.4e-05	38	5	1.8391
Cog5	5	1	1	1	18375	0	1.756	4.5769e-09	2.6896e-07	5.4e-05	39	5	1.756
Rfxank	5	0.97518	0.97532	1	16830	0	2.3829	4.6468e-09	2.6896e-07	5.4e-05	40	4	2.3829
Slc12a9	5	1	1	1	18374	0	1.7129	4.7891e-09	2.6896e-07	5.4e-05	41	5	1.7129
Med16	5	1	1	1	18373	0	2.25	5.4734e-09	2.6896e-07	5.4e-05	42	5	2.25
Smarcd1	5	1	1	1	18372	0	1.4044	5.7608e-09	2.6896e-07	5.4e-05	43	5	1.4044
Hcfc1	5	1	1	1	18371	0	1.7763	5.8328e-09	2.6896e-07	5.4e-05	44	5	1.7763
Ppm1f	5	1	1	1	18370	0	1.684	6.0231e-09	2.6896e-07	5.4e-05	45	5	1.684
Thrap3	5	0.99989	0.99989	1	18171	0	2.321	6.1995e-09	2.6896e-07	5.4e-05	46	5	2.321
Sec11a	5	1	1	1	18369	0	1.8788	6.2642e-09	2.6896e-07	5.4e-05	47	5	1.8788
Setdb1	5	1	1	1	18367	0	1.8643	7.8779e-09	2.6896e-07	5.4e-05	48	5	1.8643
Mau2	5	1	1	1	18361	0	3.7522	7.9985e-09	2.6896e-07	5.4e-05	49	5	3.7522
Keap1	5	1	1	1	18366	0	2.2901	8.8411e-09	2.6896e-07	5.4e-05	50	5	2.2901
Npc2	5	1	1	1	18332	0	2.4543	1.0299e-08	2.6896e-07	5.4e-05	51	5	2.4543
Cnot3	5	1	1	1	18365	0	2.1736	1.067e-08	2.6896e-07	5.4e-05	52	5	2.1736
Pprc1	5	1	1	1	18364	0	2.0136	1.1441e-08	2.6896e-07	5.4e-05	53	5	2.0136
Pcgf1	5	0.99686	0.99684	1	17792	0	3.3902	1.2145e-08	2.6896e-07	5.4e-05	54	5	3.3902
Med9	5	1	1	1	18363	0	1.9519	1.244e-08	2.6896e-07	5.4e-05	55	5	1.9519
Rqcd1	5	1	1	1	18362	0	2.5889	1.4559e-08	2.6896e-07	5.4e-05	56	5	2.5889
BC016423	5	0.99932	0.99931	1	18028	0	2.3626	1.4858e-08	2.6896e-07	5.4e-05	57	5	2.3626
Med18	5	0.99451	0.99452	1	17624	0	2.1535	1.8784e-08	2.6896e-07	5.4e-05	58	5	2.1535
Rnf2	5	1	1	1	18305	0	2.3339	1.8891e-08	2.6896e-07	5.4e-05	59	5	2.3339
Trim28	5	1	1	1	18360	0	1.7052	2.0162e-08	2.6896e-07	5.4e-05	60	5	1.7052
N4bp1	5	1	1	1	18359	0	1.5815	2.0358e-08	2.6896e-07	5.4e-05	61	5	1.5815
Prmt1	5	1	1	1	18348	0	2.3032	2.1367e-08	2.6896e-07	5.4e-05	62	5	2.3032
Ppp1r8	5	1	1	1	18358	0	1.9765	2.1895e-08	2.6896e-07	5.4e-05	63	5	1.9765
Tada3	5	0.73084	0.77674	1	12507	1	2.3523	2.2816e-08	2.6896e-07	5.4e-05	64	4	2.3523
Mgat1	5	1	1	1	18357	0	1.5274	2.3746e-08	2.6896e-07	5.4e-05	65	5	1.5274
Wdr82	5	1	1	1	18356	0	2.1425	2.4238e-08	2.6896e-07	5.4e-05	66	5	2.1425
B3galt6	5	1	1	1	18355	0	1.2465	2.61e-08	2.6896e-07	5.4e-05	67	5	1.2465
Asna1	5	0.41305	0.57141	1	8940	2	4.3514	3.0972e-08	2.6896e-07	5.4e-05	68	3	4.3514
Dgcr8	5	1	1	1	18354	0	1.5423	3.2042e-08	2.6896e-07	5.4e-05	69	5	1.5423
Smg8	5	1	1	1	18349	0	1.7131	3.7214e-08	2.6896e-07	5.4e-05	70	5	1.7131
Scaf8	5	1	1	1	18353	0	1.7687	3.902e-08	2.6896e-07	5.4e-05	71	5	1.7687
Sap18	3	1	1	1	18352	0	3.5637	4.5125e-08	2.6896e-07	5.4e-05	72	3	3.5637
Ankrd52	5	1	1	1	18351	0	1.286	4.5495e-08	2.6896e-07	5.4e-05	73	5	1.286
Cog3	5	1	1	1	18350	0	1.8542	4.7743e-08	2.6896e-07	5.4e-05	74	5	1.8542
Klf16	5	1	1	1	18319	0	1.6905	5.2744e-08	2.6896e-07	5.4e-05	75	5	1.6905
Nipbl	5	1	1	1	18347	0	2.8389	5.5728e-08	2.6896e-07	5.4e-05	76	5	2.8389
Sox9	5	1	1	1	18346	0	1.6956	6.0173e-08	2.6896e-07	5.4e-05	77	5	1.6956
Ggnbp2	5	1	1	1	18345	0	1.4298	6.1019e-08	2.6896e-07	5.4e-05	78	5	1.4298
Brd8	5	1	1	1	18312	0	1.854	7.0355e-08	2.6896e-07	5.4e-05	79	5	1.854
Caml	5	1	1	1	18344	0	2.7319	7.0866e-08	2.6896e-07	5.4e-05	80	5	2.7319
Slc35b2	5	1	1	1	18343	0	1.7612	8.4982e-08	2.6896e-07	5.4e-05	81	5	1.7612
Gadd45b	5	1	1	1	18342	0	1.468	8.5353e-08	2.6896e-07	5.4e-05	82	5	1.468
Cog1	5	1	1	1	18341	0	1.6579	8.9e-08	2.6896e-07	5.4e-05	83	5	1.6579
Rybp	5	1	1	1	18340	0	2.3729	9.0935e-08	2.6896e-07	5.4e-05	84	5	2.3729
Myc	5	0.99889	0.99888	1	17971	0	2.5122	9.4885e-08	2.6896e-07	5.4e-05	85	5	2.5122
Xrn1	5	0.99996	0.99996	1	18219	0	3.0735	1.0382e-07	2.6896e-07	5.4e-05	86	5	3.0735
Pbrm1	5	0.99499	0.99498	1	17655	0	1.9319	1.1214e-07	2.6896e-07	5.4e-05	87	5	1.9319
Med14	5	1	1	1	18326	0	2.501	1.1648e-07	2.6896e-07	5.4e-05	88	5	2.501
Ankrd17	5	0.98498	0.9851	1	17191	0	2.2798	1.2138e-07	2.6896e-07	5.4e-05	89	4	2.2798
Zc3h18	5	0.99975	0.99974	1	18119	0	1.927	1.2444e-07	2.6896e-07	5.4e-05	90	5	1.927
Hspa13	5	1	1	1	18339	0	1.718	1.3053e-07	2.6896e-07	5.4e-05	91	5	1.718
Ccdc115	5	1	1	1	18338	0	2.4983	1.3123e-07	2.6896e-07	5.4e-05	92	5	2.4983
Nfat5	5	1	1	1	18336	0	2.4939	1.5474e-07	8.0688e-07	0.000134	93	5	2.4939
Irf2bp2	5	0.83368	0.84062	1	13796	1	1.37	1.6092e-07	8.0688e-07	0.000134	94	4	1.37
Stk11	5	0.99999	0.99999	1	18252	0	2.5898	1.6167e-07	8.0688e-07	0.000134	95	5	2.5898
Arid2	5	1	1	1	18335	0	1.7679	1.7296e-07	8.0688e-07	0.000134	96	5	1.7679
Lsm14a	5	1	1	1	18334	0	1.5226	1.7394e-07	8.0688e-07	0.000134	97	5	1.5226
Thop1	5	1	1	1	18309	0	1.6662	1.7413e-07	8.0688e-07	0.000134	98	5	1.6662
Suv420h1	5	1	1	1	18333	0	1.3771	1.7992e-07	8.0688e-07	0.000134	99	5	1.3771
Atp6v0d1	5	0.99978	0.99978	1	18128	0	2.4688	1.8427e-07	8.0688e-07	0.000134	100	5	2.4688
Dicer1	5	0.99993	0.99994	1	18198	0	2.6311	2.0553e-07	8.0688e-07	0.000134	101	5	2.6311
Dolpp1	5	0.99028	0.99032	1	17432	0	2.074	2.094e-07	8.0688e-07	0.000134	102	4	2.074
Ube2e1	5	1	1	1	18331	0	1.9541	2.3871e-07	8.0688e-07	0.000134	103	5	1.9541
Cnot4	5	0.99988	0.99988	1	18161	0	1.9091	2.4098e-07	8.0688e-07	0.000134	104	5	1.9091
Ppfia1	5	1	1	1	18330	0	1.1622	2.6029e-07	8.0688e-07	0.000134	105	5	1.1622
Lsm10	5	1	1	1	18329	0	1.5523	2.6607e-07	8.0688e-07	0.000134	106	5	1.5523
Smg6	5	1	1	1	18328	0	1.2436	2.8179e-07	8.0688e-07	0.000134	107	5	1.2436
Irf2bpl	5	1	1	1	18327	0	1.06	2.9157e-07	8.0688e-07	0.000134	108	5	1.06
Smg9	5	0.99999	0.99999	1	18279	0	2.1994	2.9993e-07	8.0688e-07	0.000134	109	5	2.1994
Max	4	1	1	1	18325	0	2.1746	3.2225e-07	1.3448e-06	0.00021	110	4	2.1746
Gigyf2	5	0.59361	0.71708	1	11344	1	1.5837	3.2539e-07	8.0688e-07	0.000134	111	4	1.5837
Ubr4	5	1	1	1	18321	0	1.7512	3.3546e-07	1.3448e-06	0.00021	112	5	1.7512
Txndc17	5	1	1	1	18324	0	2.1882	3.5883e-07	1.3448e-06	0.00021	113	5	2.1882
Med13	5	1	1	1	18301	0	1.8555	3.6806e-07	1.3448e-06	0.00021	114	5	1.8555
Lamtor1	5	1	1	1	18323	0	1.3695	4.0086e-07	1.3448e-06	0.00021	115	5	1.3695
Fam60a	3	1	1	1	18322	0	2.4755	4.0611e-07	8.0688e-07	0.000134	116	3	2.4755
Rprd1b	5	1	1	1	18320	0	1.6129	4.4395e-07	1.3448e-06	0.00021	117	5	1.6129
Chka	5	1	1	1	18318	0	1.0561	4.7827e-07	1.3448e-06	0.00021	118	5	1.0561
Dmap1	5	1	1	1	18317	0	1.9102	5.4478e-07	1.8827e-06	0.000286	119	5	1.9102
Hectd1	5	0.99998	0.99998	1	18242	0	2.0074	5.7903e-07	1.8827e-06	0.000286	120	5	2.0074
Mon2	5	1	1	1	18316	0	1.1757	5.8372e-07	1.8827e-06	0.000286	121	5	1.1757
Katnb1	5	1	1	1	18315	0	1.415	6.5176e-07	2.4206e-06	0.000356	122	5	1.415
Smarcb1	5	1	1	1	18314	0	1.5607	6.6061e-07	2.4206e-06	0.000356	123	5	1.5607
Eif4e2	5	0.99555	0.99556	1	17692	0	1.8731	6.9554e-07	2.4206e-06	0.000356	124	5	1.8731
Med4	5	1	1	1	18313	0	1.8438	7.4399e-07	2.4206e-06	0.000356	125	5	1.8438
Nfkbia	5	0.75982	0.7924	1	12827	1	1.9727	7.5849e-07	2.9586e-06	0.000429	126	3	1.9727
Timm13	5	0.99991	0.99992	1	18189	0	1.9762	7.6682e-07	2.9586e-06	0.000429	127	5	1.9762
Ppp1cb	5	0.99999	0.99999	1	18278	0	1.7925	8.206e-07	3.4965e-06	0.000491	128	5	1.7925
Smg5	5	0.99876	0.99876	1	17948	0	1.6747	8.4898e-07	3.4965e-06	0.000491	129	5	1.6747
Usp8	5	0.99907	0.99907	1	17994	0	2.6465	8.6016e-07	3.4965e-06	0.000491	130	5	2.6465
Psenen	5	1	1	1	18311	0	1.9933	8.907e-07	3.4965e-06	0.000491	131	5	1.9933
Zfhx3	5	1	1	1	18310	0	1.0294	9.1601e-07	3.7655e-06	0.000525	132	5	1.0294
Flcn	5	1	0.99999	1	18292	0	1.6057	9.3556e-07	4.0344e-06	0.000542	133	5	1.6057
Mgea5	5	0.99857	0.99856	1	17928	0	1.832	1.0116e-06	4.0344e-06	0.000542	134	5	1.832
Actl6a	5	1	1	1	18308	0	1.3705	1.0983e-06	4.0344e-06	0.000542	135	5	1.3705
Dusp12	5	1	1	1	18307	0	1.0463	1.1021e-06	4.0344e-06	0.000542	136	5	1.0463
Frs2	5	0.99994	0.99994	1	18199	0	2.729	1.114e-06	4.0344e-06	0.000542	137	5	2.729
Med29	5	1	1	1	18306	0	1.0849	1.2964e-06	4.5723e-06	0.000601	138	5	1.0849
Cbfb	5	1	1	1	18304	0	1.8627	1.3207e-06	4.5723e-06	0.000601	139	5	1.8627
Get4	5	0.99986	0.99987	1	18154	0	1.7315	1.408e-06	4.5723e-06	0.000601	140	5	1.7315
Gnb2l1	5	0.99998	0.99998	1	18244	0	2.3244	1.4853e-06	5.6482e-06	0.000727	141	5	2.3244
Dnm2	5	0.7181	0.77034	1	12385	1	0.67664	1.486e-06	5.6482e-06	0.000727	142	4	0.67664
Wrb	5	1	0.99999	1	18287	0	2.0882	1.5266e-06	5.6482e-06	0.000727	143	5	2.0882
Il4i1	5	1	1	1	18303	0	0.81453	1.5693e-06	6.1861e-06	0.000785	144	5	0.81453
Vps51	5	1	1	1	18302	0	0.96892	1.6756e-06	6.1861e-06	0.000785	145	5	0.96892
Safb	5	1	1	1	18300	0	1.4533	1.777e-06	6.724e-06	0.000842	146	5	1.4533
Smc5	5	0.99986	0.99987	1	18153	0	1.3901	1.8236e-06	6.724e-06	0.000842	147	5	1.3901
Supt7l	5	0.99998	0.99998	1	18248	0	1.3127	2.1413e-06	7.2619e-06	0.000879	148	5	1.3127
Wtap	4	1	1	1	18299	0	1.4746	2.147e-06	7.2619e-06	0.000879	149	4	1.4746
Hsp90b1	5	1	1	1	18298	0	1.182	2.1615e-06	7.2619e-06	0.000879	150	5	1.182
Ddx21	5	0.95725	0.95748	1	16329	0	3.0465	2.2584e-06	7.2619e-06	0.000879	151	4	3.0465
Stag2	4	0.99723	0.99723	1	17823	0	2.972	2.3094e-06	7.2619e-06	0.000879	152	4	2.972
Mlst8	5	1	1	1	18297	0	0.99907	2.478e-06	1.1027e-05	0.001318	153	5	0.99907
Vps33a	5	1	1	1	18296	0	1.9095	2.5568e-06	1.1027e-05	0.001318	154	5	1.9095
Capzb	5	0.99991	0.99991	1	18185	0	1.8551	2.6582e-06	1.1565e-05	0.001356	155	5	1.8551
Wdr1	5	0.99958	0.99956	1	18080	0	1.3825	2.7197e-06	1.1565e-05	0.001356	156	5	1.3825
Smarca4	5	0.99568	0.99566	1	17700	0	2.339	2.7335e-06	1.1565e-05	0.001356	157	5	2.339
Gmppb	5	1	1	1	18295	0	1.976	2.7651e-06	1.2103e-05	0.00141	158	5	1.976
Tmem199	5	1	1	1	18294	0	1.1451	3.0123e-06	1.3179e-05	0.001526	159	5	1.1451
Prkce	5	1	0.99999	1	18293	0	1.3357	3.4012e-06	1.4255e-05	0.00163	160	5	1.3357
Cramp1l	5	0.99999	0.99999	1	18268	0	2.1033	3.4443e-06	1.4255e-05	0.00163	161	5	2.1033
Trim8	5	1	0.99999	1	18291	0	0.81057	3.6213e-06	1.4793e-05	0.001681	162	5	0.81057
Setd1a	5	0.97604	0.9762	1	16857	0	1.259	3.6966e-06	1.5869e-05	0.001792	163	4	1.259
Med12	5	0.99827	0.99825	1	17909	0	1.5323	3.9332e-06	1.6945e-05	0.001902	164	5	1.5323
Fbxo5	5	1	0.99999	1	18290	0	1.2248	3.9781e-06	1.7482e-05	0.00195	165	5	1.2248
Bcl9l	5	1	0.99999	1	18289	0	0.99445	4.063e-06	1.802e-05	0.001986	166	5	0.99445
Txnrd1	5	0.99999	0.99999	1	18259	0	1.6904	4.1474e-06	1.802e-05	0.001986	167	5	1.6904
Ell	5	1	0.99999	1	18288	0	1.0875	4.2036e-06	1.8558e-05	0.001998	168	5	1.0875
Rab10	5	0.99961	0.9996	1	18090	0	1.7452	4.233e-06	1.8558e-05	0.001998	169	5	1.7452
Lias	5	0.99997	0.99997	1	18228	0	1.1848	4.2701e-06	1.8558e-05	0.001998	170	5	1.1848
Npc1	5	1	0.99999	1	18286	0	2.1237	4.4018e-06	1.8558e-05	0.001998	171	5	2.1237
Klf5	5	0.99817	0.99816	1	17893	0	2.0579	4.5172e-06	1.9096e-05	0.002032	172	5	2.0579
Atp6v1b2	5	0.99997	0.99997	1	18233	0	2.1358	4.6512e-06	1.9096e-05	0.002032	173	5	2.1358
Xpo5	5	0.99997	0.99997	1	18224	0	1.4786	4.9916e-06	2.1248e-05	0.002248	174	5	1.4786
Med27	5	0.99999	0.99999	1	18285	0	1.3141	5.2534e-06	2.2862e-05	0.002405	175	5	1.3141
Smg7	5	0.99865	0.99863	1	17935	0	2.1164	5.3559e-06	2.3938e-05	0.002503	176	5	2.1164
Atp5d	5	0.99999	0.99999	1	18284	0	0.98138	5.4517e-06	2.4475e-05	0.002531	177	5	0.98138
Dido1	5	0.68528	0.7547	1	12083	1	1.6905	5.5783e-06	2.4475e-05	0.002531	178	4	1.6905
Rps5	5	0.99993	0.99993	1	18196	0	1.6714	5.6747e-06	2.5013e-05	0.002558	179	5	1.6714
Eed	5	0.99999	0.99999	1	18283	0	1.529	5.8535e-06	2.5013e-05	0.002558	180	5	1.529
Zbtb14	5	0.99999	0.99999	1	18282	0	1.169	5.9709e-06	2.6089e-05	0.002653	181	5	1.169
Usp7	5	0.99705	0.99704	1	17810	0	1.8363	6.0293e-06	2.6627e-05	0.002693	182	5	1.8363
Ext1	5	0.99999	0.99999	1	18281	0	1.2975	6.1848e-06	2.7703e-05	0.002786	183	5	1.2975
Alg8	5	0.99859	0.99858	1	17930	0	2.3253	6.3063e-06	2.8241e-05	0.002825	184	5	2.3253
Ahr	5	0.97838	0.97851	1	16954	0	1.9011	6.5289e-06	2.9855e-05	0.002954	185	4	1.9011
Dennd5a	5	0.99999	0.99999	1	18260	0	1.0142	6.7915e-06	3.0931e-05	0.003044	186	5	1.0142
Wdr7	5	0.82696	0.83557	1	13697	1	1.8209	6.9151e-06	3.1468e-05	0.003081	187	4	1.8209
Bcorl1	5	0.99939	0.99937	1	18043	0	1.2989	7.0404e-06	3.2006e-05	0.003117	188	5	1.2989
Spns1	5	0.99934	0.99932	1	18034	0	1.5192	7.1583e-06	3.3082e-05	0.003205	189	5	1.5192
Hira	5	0.99999	0.99999	1	18280	0	1.1022	7.2871e-06	3.362e-05	0.003223	190	5	1.1022
Spcs1	5	0.1851	0.35308	1	5741	3	-0.28694	7.2997e-06	3.362e-05	0.003223	191	2	-0.28694
Stt3a	5	0.32664	0.49817	1	7842	1	2.2761	7.3219e-06	3.4158e-05	0.003258	192	4	2.2761
Ptpn12	5	0.9978	0.99778	1	17870	0	1.0906	7.8379e-06	3.6848e-05	0.003496	193	5	1.0906
Cwc27	5	0.99701	0.99701	1	17805	0	1.968	7.8893e-06	3.7386e-05	0.003525	194	5	1.968
Pagr1a	5	0.99998	0.99998	1	18239	0	1.2707	8.2356e-06	3.7923e-05	0.003525	195	5	1.2707
Mars2	5	0.99999	0.99999	1	18277	0	1.2517	8.2882e-06	3.7923e-05	0.003525	196	5	1.2517
Smg1	5	0.99997	0.99997	1	18226	0	1.3261	8.3374e-06	3.7923e-05	0.003525	197	5	1.3261
Slc25a28	5	0.99999	0.99999	1	18276	0	0.92307	8.4286e-06	3.8461e-05	0.003557	198	5	0.92307
Srrt	5	0.8983	0.8987	1	14980	0	1.4419	8.7431e-06	3.9537e-05	0.003629	199	4	1.4419
Sos1	5	0.99975	0.99975	1	18120	0	2.1694	8.832e-06	4.0075e-05	0.003629	200	5	2.1694
Lrrn4cl	5	0.99999	0.99999	1	18275	0	0.68507	8.9326e-06	4.0075e-05	0.003629	201	5	0.68507
Ccdc9	5	0.99999	0.99999	1	18274	0	0.82124	8.9531e-06	4.0075e-05	0.003629	202	5	0.82124
Capn1	5	0.99999	0.99999	1	18273	0	0.8707	8.9659e-06	4.0613e-05	0.003629	203	5	0.8707
2010003K11Rik	5	0.99999	0.99999	1	18272	0	0.6384	9.0662e-06	4.0613e-05	0.003629	204	5	0.6384
Mark2	5	0.9916	0.99167	1	17484	0	1.3267	9.1197e-06	4.0613e-05	0.003629	205	4	1.3267
F8a	5	0.99987	0.99987	1	18160	0	1.106	9.4969e-06	4.2227e-05	0.003737	206	5	1.106
Hdac2	5	0.99999	0.99999	1	18271	0	1.0469	9.5516e-06	4.2227e-05	0.003737	207	5	1.0469
Kdm2b	5	0.99892	0.99891	1	17976	0	1.2212	9.7472e-06	4.3303e-05	0.003777	208	5	1.2212
Med15	5	0.99999	0.99999	1	18270	0	1.3649	9.7472e-06	4.3303e-05	0.003777	209	5	1.3649
Unc50	5	0.91155	0.91193	1	15255	0	1.8129	9.7811e-06	4.3303e-05	0.003777	210	4	1.8129
Slc35a2	5	0.99848	0.99847	1	17920	0	1.5112	9.8625e-06	4.3841e-05	0.003806	211	5	1.5112
Tbk1	5	0.99999	0.99999	1	18269	0	1.3793	1.0002e-05	4.4916e-05	0.003881	212	5	1.3793
Pstk	5	0.99999	0.99999	1	18267	0	1.1605	1.0388e-05	4.7068e-05	0.004038	213	5	1.1605
Hdac8	5	0.99619	0.99616	1	17744	0	1.3819	1.0509e-05	4.7606e-05	0.004038	214	5	1.3819
Ostc	5	0.96255	0.96276	1	16470	0	1.7188	1.0552e-05	4.7606e-05	0.004038	215	4	1.7188
Sin3a	5	0.99999	0.99999	1	18266	0	1.8004	1.0562e-05	4.7606e-05	0.004038	216	5	1.8004
Msl3	5	0.59003	0.71575	1	11317	1	1.1321	1.1035e-05	4.8682e-05	0.00411	217	4	1.1321
Ddx56	5	0.99268	0.99274	1	17533	0	2.4628	1.1315e-05	4.922e-05	0.004137	218	4	2.4628
Atp6ap1	5	0.99999	0.99999	1	18265	0	0.98987	1.1668e-05	5.0296e-05	0.004177	219	5	0.98987
2410016O06Rik	5	0.99999	0.99999	1	18264	0	0.83778	1.1725e-05	5.0296e-05	0.004177	220	5	0.83778
Ier2	5	0.95753	0.95776	1	16337	0	0.9155	1.2024e-05	5.0834e-05	0.004177	221	4	0.9155
Tpp2	5	0.99652	0.9965	1	17766	0	1.351	1.2051e-05	5.0834e-05	0.004177	222	5	1.351
Atp6v1a	5	0.99999	0.99999	1	18263	0	1.3963	1.213e-05	5.1372e-05	0.004202	223	5	1.3963
Taf13	5	0.99999	0.99999	1	18262	0	1.5265	1.2374e-05	5.1909e-05	0.004209	224	5	1.5265
Tm2d3	5	0.99999	0.99999	1	18258	0	1.1131	1.2556e-05	5.1909e-05	0.004209	225	5	1.1131
Ddx27	5	0.99995	0.99995	1	18211	0	1.8387	1.2715e-05	5.2985e-05	0.004277	226	5	1.8387
Wwp2	5	0.99999	0.99999	1	18261	0	0.98026	1.2862e-05	5.3523e-05	0.004302	227	5	0.98026
Hdac1	4	0.88834	0.88844	1	14794	0	2.1276	1.3011e-05	5.0834e-05	0.004177	228	3	2.1276
Bend3	5	0.99819	0.99817	1	17897	0	0.91288	1.3163e-05	5.4599e-05	0.00435	229	5	0.91288
Nrxn2	5	0.99979	0.99979	1	18132	0	0.92836	1.3264e-05	5.5137e-05	0.004356	230	5	0.92836
Dohh	5	0.96413	0.96433	1	16506	0	1.6125	1.3286e-05	5.5137e-05	0.004356	231	4	1.6125
Med19	5	0.99999	0.99999	1	18257	0	0.87398	1.3649e-05	5.6213e-05	0.004422	232	5	0.87398
Cog4	5	0.99999	0.99999	1	18256	0	1.1389	1.4055e-05	5.8365e-05	0.004571	233	5	1.1389
Tmem91	5	0.99999	0.99999	1	18255	0	0.81112	1.4151e-05	5.944e-05	0.004616	234	5	0.81112
Pcgf5	5	0.9999	0.9999	1	18180	0	1.5117	1.4214e-05	5.944e-05	0.004616	235	5	1.5117
Hist1h1d	4	0.99999	0.99998	1	18254	0	1.3433	1.4437e-05	5.4599e-05	0.00435	236	4	1.3433
Cd3eap	5	0.99998	0.99998	1	18251	0	0.78307	1.5794e-05	6.6433e-05	0.005138	237	5	0.78307
Otud5	5	0.99998	0.99998	1	18250	0	0.70131	1.6242e-05	6.8047e-05	0.005219	238	5	0.70131
Fbrs	5	0.99998	0.99998	1	18249	0	1.1998	1.6254e-05	6.8047e-05	0.005219	239	5	1.1998
Cd209f	5	0.87487	0.87552	1	14516	1	1.0614	1.6998e-05	7.4502e-05	0.00569	240	4	1.0614
Ltbp3	5	0.99998	0.99998	1	18247	0	0.65357	1.71e-05	7.504e-05	0.005707	241	5	0.65357
Hist1h4d	2	0.99998	0.99998	1	18246	0	3.7427	1.7337e-05	2.9855e-05	0.002954	242	2	3.7427
Cbll1	5	0.99998	0.99998	1	18245	0	1.4359	1.7683e-05	7.7192e-05	0.005847	243	5	1.4359
Gdi2	5	0.97159	0.97171	1	16720	0	1.484	1.8349e-05	8.015e-05	0.006046	244	4	1.484
Gnptab	5	0.99998	0.99998	1	18243	0	0.90697	1.8999e-05	8.3109e-05	0.006244	245	5	0.90697
Cdkn2aip	5	0.99998	0.99998	1	18241	0	1.1226	1.9471e-05	8.4723e-05	0.006313	246	5	1.1226
Chaf1a	5	0.83785	0.84381	1	13863	1	1.5784	1.9487e-05	8.4723e-05	0.006313	247	4	1.5784
Trip12	5	0.99816	0.99814	1	17891	0	1.6498	1.9694e-05	8.5261e-05	0.006328	248	5	1.6498
Rrs1	5	0.99998	0.99998	1	18240	0	1.4402	1.972e-05	8.5799e-05	0.006342	249	5	1.4402
Slc3a2	5	0.98944	0.98953	1	17394	0	1.1938	1.9974e-05	8.6874e-05	0.006396	250	4	1.1938
Upf2	5	0.9838	0.9839	1	17150	0	1.5977	2.0151e-05	8.7412e-05	0.006398	251	4	1.5977
Huwe1	5	0.99998	0.99998	1	18238	0	1.1059	2.0343e-05	8.795e-05	0.006398	252	5	1.1059
Ruvbl2	5	0.99998	0.99998	1	18237	0	1.3655	2.0486e-05	8.795e-05	0.006398	253	5	1.3655
Men1	5	0.99996	0.99996	1	18218	0	1.1651	2.0629e-05	8.8488e-05	0.006412	254	5	1.1651
Slc39a9	5	0.99997	0.99997	1	18225	0	0.93425	2.13e-05	9.3329e-05	0.006737	255	5	0.93425
Ppp1r12a	5	0.99995	0.99995	1	18210	0	1.3563	2.1945e-05	9.6019e-05	0.006904	256	5	1.3563
Ep400	5	0.99998	0.99998	1	18236	0	0.73483	2.2812e-05	0.00010355	0.007416	257	5	0.73483
Erbb3	5	0.99998	0.99998	1	18235	0	1.2058	2.291e-05	0.00010463	0.007464	258	5	1.2058
Kcmf1	5	0.98501	0.98513	1	17195	0	1.8148	2.3388e-05	0.00010785	0.007665	259	4	1.8148
Dpp3	5	0.99998	0.99998	1	18234	0	0.79869	2.4333e-05	0.00011377	0.008054	260	5	0.79869
Timm44	5	0.98367	0.98377	1	17143	0	1.8178	2.4442e-05	0.00011485	0.008099	261	4	1.8178
Brd7	5	0.99826	0.99824	1	17908	0	1.3912	2.5413e-05	0.00011915	0.00837	262	5	1.3912
Cep135	5	0.99997	0.99997	1	18232	0	0.68128	2.6101e-05	0.00012292	0.008602	263	5	0.68128
Atp6v1e1	5	0.99997	0.99997	1	18231	0	1.1423	2.706e-05	0.0001256	0.008659	264	5	1.1423
Papd5	5	0.99989	0.99989	1	18173	0	1.434	2.7125e-05	0.0001256	0.008659	265	5	1.434
Mki67	5	0.99997	0.99997	1	18230	0	0.87818	2.7128e-05	0.0001256	0.008659	266	5	0.87818
Ap2s1	5	0.99989	0.99989	1	18169	0	1.0667	2.7317e-05	0.00012614	0.008663	267	5	1.0667
Emc7	5	0.99997	0.99997	1	18229	0	1.2882	2.7384e-05	0.00012722	0.008705	268	5	1.2882
Ppp2r1a	5	0.98264	0.98273	1	17102	0	1.4081	2.808e-05	0.00012991	0.008856	269	4	1.4081
Pdcd5	5	0.99997	0.99997	1	18227	0	0.92984	2.8354e-05	0.00013045	0.00886	270	5	0.92984
Rictor	5	0.99996	0.99997	1	18221	0	0.91305	2.9092e-05	0.00013529	0.009155	271	5	0.91305
Pih1d1	5	0.99976	0.99976	1	18122	0	1.0852	2.9339e-05	0.00013744	0.009266	272	5	1.0852
Spop	5	0.60625	0.72187	1	11428	1	1.7394	2.9438e-05	0.00013798	0.009269	273	3	1.7394
Sec63	5	0.81189	0.82493	1	13446	1	1.4559	3.0037e-05	0.00014067	0.009347	274	4	1.4559
Gmip	5	0.99984	0.99985	1	18148	0	1.2811	3.0122e-05	0.00014067	0.009347	275	5	1.2811
Ms4a15	5	0.99108	0.99116	1	17462	0	1.0788	3.013e-05	0.00014067	0.009347	276	4	1.0788
Ndnl2	5	0.9024	0.90278	1	15061	0	1.2485	3.1913e-05	0.00015143	0.010026	277	4	1.2485
Lamtor4	5	0.99004	0.9901	1	17419	0	2.0484	3.231e-05	0.00015411	0.010167	278	4	2.0484
Ube2h	4	0.99997	0.99997	1	18223	0	1.2838	3.3076e-05	0.00012453	0.008659	279	4	1.2838
Deaf1	5	0.99997	0.99997	1	18222	0	0.94823	3.3357e-05	0.00015842	0.010414	280	5	0.94823
Rabif	5	0.99869	0.99868	1	17942	0	1.3244	3.536e-05	0.00016487	0.010799	281	5	1.3244
Dis3	5	0.99996	0.99997	1	18220	0	0.81899	3.583e-05	0.00017025	0.011112	282	5	0.81899
Btaf1	5	0.97558	0.97574	1	16838	0	1.0756	3.7749e-05	0.00018155	0.011808	283	4	1.0756
Larp1	5	0.99995	0.99996	1	18214	0	1.5813	3.9578e-05	0.00018962	0.012289	284	5	1.5813
Usp5	5	0.92729	0.92762	1	15575	0	1.3893	4.0365e-05	0.00019661	0.012698	285	4	1.3893
Rpf1	5	0.97113	0.97125	1	16709	0	2.0146	4.1507e-05	0.0001993	0.012826	286	4	2.0146
Pdcd11	5	0.99996	0.99996	1	18217	0	0.89526	4.2927e-05	0.00020576	0.01315	287	5	0.89526
Tmed2	5	0.99996	0.99996	1	18216	0	1.671	4.3134e-05	0.00020576	0.01315	288	5	1.671
Cabin1	5	0.99996	0.99996	1	18215	0	0.68797	4.4105e-05	0.00020898	0.013264	289	5	0.68797
Vps41	5	0.99594	0.99593	1	17724	0	2.1789	4.4116e-05	0.00020898	0.013264	290	5	2.1789
B4galt7	5	0.99272	0.99277	1	17537	0	1.4987	4.5854e-05	0.00021759	0.013736	291	4	1.4987
Arl1	5	0.86312	0.86457	1	14284	1	1.0544	4.5963e-05	0.00021813	0.013736	292	4	1.0544
Strap	5	0.99882	0.99881	1	17956	0	2.1998	4.6096e-05	0.00021867	0.013736	293	5	2.1998
Acvr1	5	0.99618	0.99615	1	17741	0	0.96353	4.6697e-05	0.00022243	0.013925	294	5	0.96353
1110037F02Rik	5	0.99995	0.99996	1	18213	0	1.1687	4.7425e-05	0.00022512	0.014046	295	5	1.1687
Zc3h4	5	0.99995	0.99995	1	18212	0	1.4701	4.8305e-05	0.0002305	0.014333	296	5	1.4701
Kmt2b	5	0.99994	0.99994	1	18203	0	1.1052	5.1007e-05	0.00024287	0.015052	297	5	1.1052
Krit1	5	0.99995	0.99995	1	18209	0	1.0533	5.2608e-05	0.00024718	0.015267	298	5	1.0533
Pdia6	5	0.99995	0.99995	1	18208	0	1.1533	5.3907e-05	0.00025363	0.015613	299	5	1.1533
Syvn1	5	0.99981	0.99981	1	18138	0	1.0241	5.4357e-05	0.00025632	0.015726	300	5	1.0241
Vps16	5	0.99995	0.99995	1	18207	0	0.85374	5.4861e-05	0.00026009	0.015904	301	5	0.85374
Clptm1	5	0.99994	0.99995	1	18206	0	0.79519	5.6628e-05	0.000266	0.016065	302	5	0.79519
Ehmt2	5	0.99994	0.99995	1	18205	0	0.97831	5.6807e-05	0.00026654	0.016065	303	5	0.97831
Cog7	5	0.99883	0.99882	1	17958	0	1.2547	5.6921e-05	0.00026654	0.016065	304	5	1.2547
Otub1	5	0.33894	0.50847	1	7996	1	1.4208	5.7091e-05	0.00026708	0.016065	305	4	1.4208
Tma16	5	0.99994	0.99994	1	18204	0	1.306	5.7145e-05	0.00026708	0.016065	306	5	1.306
Eefsec	5	0.98281	0.98291	1	17106	0	1.6975	5.8469e-05	0.000273	0.016367	307	4	1.6975
Armc7	5	0.99994	0.99994	1	18202	0	1.8566	5.9807e-05	0.00027784	0.016603	308	5	1.8566
Dcp1a	5	0.99994	0.99994	1	18201	0	0.84439	6.0985e-05	0.00028053	0.016656	309	5	0.84439
Mgat2	5	0.99994	0.99994	1	18200	0	0.86685	6.1641e-05	0.00028375	0.016793	310	5	0.86685
Tmed10	5	0.9812	0.98136	1	17050	0	1.5226	6.4886e-05	0.00029882	0.017628	311	4	1.5226
Jund	5	0.99993	0.99994	1	18197	0	0.78605	6.6823e-05	0.00030581	0.017983	312	5	0.78605
Cog2	5	0.31098	0.48512	1	7647	1	0.90591	7.1417e-05	0.00032625	0.019063	313	4	0.90591
Eftud1	5	0.95775	0.95796	1	16344	0	0.88379	7.2588e-05	0.00033055	0.019254	314	4	0.88379
Fermt3	5	0.99993	0.99993	1	18195	0	0.53729	7.3706e-05	0.00033378	0.019351	315	5	0.53729
Ehmt1	5	0.94267	0.9429	1	15937	0	1.1944	7.3975e-05	0.00033432	0.019351	316	4	1.1944
Prr24	5	0.99993	0.99993	1	18194	0	0.72526	7.493e-05	0.0003397	0.01957	317	5	0.72526
Klf9	5	0.99974	0.99974	1	18116	0	1.1017	7.6293e-05	0.00034508	0.019787	318	5	1.1017
Tm9sf3	5	0.99866	0.99864	1	17936	0	1.3248	7.6499e-05	0.00034615	0.019787	319	5	1.3248
Bloc1s1	5	0.39351	0.55467	1	8703	1	1.0348	7.7174e-05	0.00035046	0.019971	320	4	1.0348
Ltn1	5	0.86575	0.86698	1	14343	1	1.0942	7.8605e-05	0.00035745	0.020305	321	4	1.0942
Alg6	5	0.94139	0.94163	1	15901	0	1.3102	7.9396e-05	0.00035852	0.020305	322	4	1.3102
Arf1	5	0.94337	0.94361	1	15964	0	1.6934	8.0258e-05	0.00036498	0.020607	323	4	1.6934
Lrig1	5	0.99992	0.99992	1	18193	0	0.61842	8.1324e-05	0.00037036	0.020847	324	5	0.61842
Rad51d	5	0.99992	0.99992	1	18192	0	0.78314	8.2029e-05	0.00037197	0.020874	325	5	0.78314
Mapk1	5	0.99931	0.99929	1	18025	0	1.5719	8.2786e-05	0.00037681	0.021081	326	5	1.5719
Ap3d1	5	0.99992	0.99992	1	18191	0	1.1784	8.4434e-05	0.00038596	0.021527	327	5	1.1784
Stil	5	0.99991	0.99992	1	18190	0	1.0212	8.5611e-05	0.0003908	0.021666	328	5	1.0212
Tef	5	0.98889	0.98896	1	17358	0	1.0576	8.5677e-05	0.0003908	0.021666	329	4	1.0576
Rpl4	5	0.61719	0.72612	1	11509	1	2.1643	8.6745e-05	0.0003951	0.021839	330	4	2.1643
Nucb1	5	0.99991	0.99991	1	18188	0	0.68155	8.9366e-05	0.0004064	0.022396	331	5	0.68155
Epc2	5	0.99991	0.99991	1	18187	0	1.3718	9.0012e-05	0.00040909	0.022477	332	5	1.3718
Ube2d3	3	0.99991	0.9999	1	18186	0	1.7241	9.2196e-05	0.00028053	0.016656	333	3	1.7241
Atp6v1h	5	0.99326	0.99329	1	17565	0	1.4373	9.414e-05	0.00042738	0.023412	334	4	1.4373
Bcl6	5	0.9999	0.99991	1	18184	0	0.97995	9.6514e-05	0.00043814	0.02393	335	5	0.97995
Cdc42ep2	5	0.97351	0.9736	1	16779	0	0.94037	9.8116e-05	0.00044513	0.024198	336	4	0.94037
Poglut1	5	0.9999	0.99991	1	18183	0	0.73804	9.8222e-05	0.00044567	0.024198	337	5	0.73804
Med10	5	0.9999	0.99991	1	18182	0	1.2462	9.8344e-05	0.00044782	0.024243	338	5	1.2462
Map2k3	5	0.9999	0.9999	1	18181	0	0.91026	0.00010155	0.00046181	0.024883	339	5	0.91026
Ptbp1	5	0.93707	0.93732	1	15793	0	1.0835	0.00010341	0.00047041	0.025243	340	4	1.0835
Irf6	5	0.99866	0.99864	1	17937	0	1.2402	0.00010658	0.00048278	0.025757	341	5	1.2402
Rgp1	5	0.99535	0.99535	1	17678	0	1.1295	0.00010719	0.00048709	0.025819	342	5	1.1295
Cabp2	5	0.99989	0.9999	1	18179	0	0.74731	0.00010736	0.00048763	0.025819	343	5	0.74731
Pgap2	5	0.99989	0.9999	1	18178	0	0.80978	0.00010762	0.00048816	0.025819	344	5	0.80978
Dbp	5	0.99989	0.99989	1	18177	0	0.54295	0.00010818	0.00048978	0.025831	345	5	0.54295
H2afz	3	0.99989	0.99989	1	18176	0	1.941	0.00010881	0.00034024	0.01957	346	3	1.941
Bbx	5	0.55962	0.70014	1	11025	1	0.98921	0.00010891	0.00049247	0.025879	347	4	0.98921
Nars2	5	0.99989	0.99989	1	18175	0	1.2764	0.00010937	0.00049462	0.025879	348	5	1.2764
Upf1	5	0.99629	0.99625	1	17748	0	1.1795	0.00011002	0.00049785	0.025879	349	5	1.1795
Gatad2a	5	0.99989	0.99989	1	18174	0	0.50087	0.00011034	0.00049838	0.025879	350	5	0.50087
Prkrir	5	0.17681	0.34104	1	5570	1	1.5629	0.00011093	0.0005	0.025879	351	4	1.5629
Mbip	5	0.93535	0.93563	1	15751	0	1.105	0.00011117	0.00050054	0.025879	352	3	1.105
Adamts17	5	0.99989	0.99989	1	18172	0	0.5311	0.00011253	0.00050538	0.026056	353	5	0.5311
Cdyl	5	0.99989	0.99989	1	18170	0	0.64818	0.00011428	0.00051398	0.02638	354	5	0.64818
Dnaaf3	5	0.99989	0.99989	1	18168	0	0.95429	0.00011456	0.00051452	0.02638	355	5	0.95429
Emc8	5	0.99988	0.99989	1	18167	0	0.89634	0.00011634	0.00052582	0.026884	356	5	0.89634
Tube1	5	0.75704	0.79079	1	12787	1	1.1198	0.00011782	0.00053174	0.026989	357	4	1.1198
Vps26a	5	0.99988	0.99989	1	18166	0	1.2162	0.00011794	0.00053174	0.026989	358	5	1.2162
3110040N11Rik	5	0.99988	0.99989	1	18165	0	0.94333	0.00011806	0.00053227	0.026989	359	5	0.94333
BC003331	5	0.99681	0.9968	1	17789	0	0.99173	0.00011908	0.0005355	0.027065	360	5	0.99173
Ube2e3	5	0.99988	0.99988	1	18164	0	1.4454	0.00012005	0.00053765	0.027065	361	5	1.4454
Sepsecs	5	0.99619	0.99616	1	17743	0	1.4696	0.00012039	0.00053819	0.027065	362	5	1.4696
Cmip	5	0.99986	0.99987	1	18156	0	1.1526	0.00012086	0.0005398	0.027073	363	5	1.1526
Actr5	5	0.99988	0.99988	1	18163	0	0.9771	0.00012111	0.00054142	0.02708	364	5	0.9771
Epn1	5	0.91592	0.91621	1	15342	0	0.99453	0.00012169	0.00054357	0.027114	365	4	0.99453
Ccdc155	5	0.99988	0.99988	1	18162	0	0.58161	0.00012277	0.00054572	0.027147	366	5	0.58161
Ccdc88b	5	0.99958	0.99957	1	18081	0	0.88443	0.00012411	0.00055271	0.027421	367	5	0.88443
Csrp2bp	5	0.62764	0.73016	1	11598	1	1.5176	0.00012492	0.00055702	0.02756	368	3	1.5176
Rbbp4	5	0.9998	0.99981	1	18135	0	1.7799	0.00012563	0.00056078	0.027672	369	5	1.7799
Btg1	4	0.91974	0.91993	1	15418	0	1.6698	0.00012617	0.00048225	0.025757	370	3	1.6698
Asns	5	0.74417	0.78373	1	12647	1	0.81305	0.00012664	0.0005702	0.028062	371	3	0.81305
Sel1l	5	0.99792	0.9979	1	17873	0	0.85452	0.000127	0.00057316	0.028132	372	5	0.85452
Lgals12	5	0.99982	0.99982	1	18139	0	0.81822	0.00012774	0.00057638	0.028193	373	5	0.81822
Ncbp1	5	0.99983	0.99984	1	18145	0	0.98989	0.00012781	0.00057746	0.028193	374	5	0.98989
Ubtf	5	0.97029	0.9704	1	16680	0	1.9283	0.00012997	0.0005866	0.028564	375	4	1.9283
Mrto4	4	0.99987	0.99987	1	18159	0	1.2397	0.00013015	0.00049785	0.025879	376	4	1.2397
Tm7sf2	5	0.99987	0.99987	1	18158	0	0.70432	0.00013391	0.00061135	0.02969	377	5	0.70432
Mrgprf	5	0.99986	0.99987	1	18157	0	0.64042	0.00013548	0.00061942	0.030003	378	5	0.64042
Ube2a	5	0.99986	0.99987	1	18155	0	1.1799	0.00013738	0.00062641	0.030262	379	5	1.1799
Cnot1	5	0.98689	0.98694	1	17274	0	0.92392	0.00013809	0.00062964	0.03031	380	4	0.92392
Myo9b	5	0.92069	0.92105	1	15447	0	0.8938	0.00013833	0.00063071	0.03031	381	4	0.8938
Cope	5	0.96529	0.96548	1	16542	0	1.4098	0.00014366	0.00065384	0.03134	382	4	1.4098
Ufsp2	5	0.99985	0.99986	1	18151	0	0.87591	0.00014519	0.00065976	0.03146	383	5	0.87591
Romo1	5	0.99976	0.99976	1	18123	0	1.4827	0.00014786	0.00067429	0.031981	384	5	1.4827
Rnaseh2c	5	0.98728	0.98732	1	17288	0	1.0482	0.00014806	0.0006759	0.031981	385	4	1.0482
Rpl24	3	0.72529	0.72548	1	12459	0	2.5635	0.00014831	0.00046234	0.024883	386	2	2.5635
4933426M11Rik	5	0.9721	0.9722	1	16738	0	0.92394	0.0001487	0.00067859	0.031995	387	4	0.92394
Oxa1l	5	0.99589	0.99589	1	17718	0	1.0304	0.00014883	0.00067966	0.031995	388	5	1.0304
Prr12	5	0.99982	0.99982	1	18142	0	1.0674	0.00014966	0.00068343	0.03209	389	5	1.0674
Mesdc1	5	0.99684	0.99682	1	17791	0	0.97798	0.00015054	0.00068935	0.032116	390	5	0.97798
Baz2a	5	0.9149	0.9152	1	15320	0	0.79975	0.0001508	0.00069042	0.032116	391	4	0.79975
Mtf1	5	0.99985	0.99986	1	18150	0	0.86189	0.00015088	0.00069096	0.032116	392	5	0.86189
Fam92b	5	0.99985	0.99986	1	18149	0	0.50172	0.00015093	0.00069096	0.032116	393	5	0.50172
Fam89b	5	0.99962	0.99961	1	18092	0	0.72844	0.00015315	0.00070441	0.032576	394	5	0.72844
Cnep1r1	5	0.54141	0.68364	1	10738	2	0.13869	0.00015316	0.00070441	0.032576	395	2	0.13869
Sgta	5	0.99937	0.99935	1	18042	0	0.94462	0.00015871	0.00073561	0.033934	396	5	0.94462
Tnip2	5	0.99984	0.99985	1	18147	0	0.47696	0.00015899	0.00073776	0.033948	397	5	0.47696
Cbx3	2	0.99984	0.99984	1	18146	0	2.1126	0.00016309	0.00032356	0.018966	398	2	2.1126
Zfp296	5	0.82162	0.83174	1	13608	1	1.0334	0.00016566	0.00076681	0.035197	399	3	1.0334
1810019J16Rik	5	0.41077	0.56953	1	8916	1	0.61496	0.00016697	0.0007738	0.035391	400	4	0.61496
Rexo1	5	0.99612	0.99609	1	17738	0	0.78726	0.0001673	0.00077488	0.035391	401	5	0.78726
Msl1	5	0.96328	0.96349	1	16487	0	0.88103	0.00016854	0.00078079	0.035572	402	4	0.88103
Stx5a	5	0.97566	0.97581	1	16841	0	0.84972	0.00016911	0.00078348	0.035607	403	4	0.84972
Sox4	5	0.99954	0.99952	1	18069	0	0.72952	0.00017377	0.00080769	0.036617	404	5	0.72952
Fntb	5	0.99759	0.99757	1	17857	0	1.0104	0.00017474	0.00081361	0.036794	405	5	1.0104
Dr1	5	0.37136	0.53582	1	8412	2	0.40851	0.00017563	0.00081683	0.03685	406	2	0.40851
Dexi	5	0.99982	0.99983	1	18144	0	0.61081	0.00017625	0.00082006	0.036905	407	5	0.61081
Alg5	4	0.99982	0.99983	1	18143	0	1.7149	0.00017629	0.00066729	0.031737	408	4	1.7149
Eif2b4	5	0.9801	0.98023	1	17017	0	1.1511	0.00017742	0.00082221	0.036911	409	4	1.1511
Pias4	5	0.99401	0.99402	1	17598	0	0.78778	0.00017912	0.00083028	0.037183	410	5	0.78778
Bmpr1a	5	0.99982	0.99982	1	18140	0	1.3537	0.00018315	0.00084696	0.037838	411	5	1.3537
Supt6	5	0.99957	0.99956	1	18077	0	1.3833	0.00018688	0.00086417	0.038513	412	5	1.3833
C1d	5	0.99974	0.99974	1	18115	0	2.1157	0.00019058	0.00088031	0.038951	413	5	2.1157
Numb	5	0.99554	0.99555	1	17691	0	0.89256	0.0001907	0.00088031	0.038951	414	5	0.89256
Polr1b	5	0.99981	0.99981	1	18137	0	0.96094	0.00019169	0.00088246	0.038951	415	5	0.96094
Pdzd7	5	0.99981	0.99981	1	18136	0	0.56149	0.00019181	0.00088246	0.038951	416	5	0.56149
Ascc3	5	0.95371	0.95396	1	16228	0	1.2184	0.00019409	0.00089322	0.039332	417	4	1.2184
Fbxo28	5	0.99823	0.99821	1	17904	0	1.2652	0.00019622	0.00090075	0.039569	418	5	1.2652
Acy3	5	0.9998	0.9998	1	18134	0	0.90805	0.0001999	0.00091581	0.040134	419	5	0.90805
B3gat3	5	0.99914	0.99914	1	18006	0	0.73819	0.00020151	0.00092173	0.040202	420	5	0.73819
Chaf1b	5	0.99979	0.99979	1	18130	0	1.463	0.00020228	0.00092765	0.040365	421	5	1.463
Pole4	5	0.9975	0.99748	1	17847	0	1.4031	0.00020561	0.00094056	0.040827	422	5	1.4031
Brms1	5	0.99979	0.9998	1	18133	0	0.93609	0.00020605	0.00094271	0.040827	423	5	0.93609
Uri1	5	0.99979	0.99979	1	18131	0	1.1819	0.00021216	0.00096853	0.041698	424	5	1.1819
Zranb1	5	0.99887	0.99887	1	17966	0	1.2683	0.00021229	0.0009696	0.041698	425	5	1.2683
Hdlbp	5	0.99185	0.99191	1	17500	0	1.1725	0.00021379	0.00097821	0.04197	426	4	1.1725
Sept12	5	0.99979	0.99979	1	18129	0	0.54031	0.00021487	0.00098251	0.042005	427	5	0.54031
Klf13	5	0.98941	0.9895	1	17390	0	0.76928	0.00021518	0.00098359	0.042005	428	4	0.76928
Bop1	5	0.99867	0.99866	1	17939	0	1.5172	0.00022038	0.0010078	0.042931	429	5	1.5172
Slc29a2	5	0.99943	0.99941	1	18052	0	0.75039	0.00022085	0.0010099	0.042931	430	5	0.75039
Snx3	5	0.99978	0.99978	1	18127	0	0.57711	0.00022366	0.0010229	0.04338	431	5	0.57711
Hscb	5	0.99674	0.99673	1	17780	0	1.4917	0.00022658	0.0010352	0.043761	432	5	1.4917
Osbpl11	5	0.99977	0.99978	1	18126	0	0.78598	0.00022745	0.0010385	0.043761	433	5	0.78598
Htt	5	0.99977	0.99977	1	18125	0	1.1257	0.00022762	0.001039	0.043761	434	5	1.1257
Kirrel2	5	0.99977	0.99977	1	18124	0	0.42688	0.00023156	0.0010584	0.044475	435	5	0.42688
1810013L24Rik	5	0.9981	0.99809	1	17885	0	0.88606	0.00023369	0.0010632	0.044577	436	5	0.88606
Vcpip1	5	0.93834	0.93858	1	15819	0	0.92291	0.00023706	0.0010777	0.045083	437	4	0.92291
Vps29	5	0.96332	0.96353	1	16489	0	1.3688	0.00023852	0.0010858	0.045318	438	4	1.3688
Chrna10	5	0.65833	0.74279	1	11849	1	0.64533	0.00023929	0.0010896	0.045372	439	4	0.64533
Tceb3	5	0.99262	0.99268	1	17530	0	1.2741	0.00024041	0.0010944	0.045471	440	4	1.2741
Ptgir	5	0.99975	0.99975	1	18121	0	0.67394	0.00024683	0.0011261	0.046684	441	5	0.67394
Sdha	5	0.99042	0.99047	1	17435	0	1.4104	0.00024808	0.001131	0.046779	442	4	1.4104
Acaca	5	0.59891	0.71913	1	11375	1	1.5219	0.00025198	0.0011514	0.047518	443	4	1.5219
Hsd3b7	5	0.99974	0.99974	1	18118	0	0.60453	0.00025507	0.0011633	0.047792	444	5	0.60453
Arf4	5	0.9837	0.98381	1	17144	0	1.2446	0.00025596	0.0011686	0.047906	445	4	1.2446
Csrnp1	5	0.99968	0.99968	1	18104	0	0.80188	0.00025753	0.0011772	0.048152	446	5	0.80188
Aip	5	0.64004	0.73525	1	11698	1	1.1947	0.00025818	0.0011815	0.048221	447	4	1.1947
Tle4	5	0.99974	0.99974	1	18117	0	0.64278	0.00025996	0.0011896	0.048443	448	5	0.64278
Dbf4	5	0.99449	0.9945	1	17621	0	1.0136	0.00026074	0.0011934	0.048489	449	5	1.0136
Gltscr1l	5	0.99974	0.99974	1	18114	0	0.43806	0.00026296	0.0012041	0.048818	450	5	0.43806
Ffar4	5	0.99974	0.99974	1	18113	0	0.58667	0.00026388	0.0012106	0.048864	451	5	0.58667
Nsmce1	5	0.99652	0.9965	1	17765	0	1.0932	0.00026615	0.0012208	0.049169	452	5	1.0932
Grb2	5	0.99807	0.99807	1	17882	0	1.2891	0.00026675	0.0012235	0.04917	453	5	1.2891
Sept1	5	0.99962	0.99962	1	18094	0	0.6684	0.00026763	0.0012294	0.0493	454	5	0.6684
Copb2	5	0.99973	0.99973	1	18112	0	1.3131	0.00026843	0.0012337	0.049365	455	5	1.3131
Gtf2i	5	0.99934	0.99932	1	18032	0	0.74266	0.00027142	0.0012461	0.049752	456	5	0.74266
Sertad1	5	0.99941	0.99939	1	18048	0	0.93359	0.00027485	0.0012617	0.050266	457	5	0.93359
Slmo2	5	0.49027	0.63813	1	10004	1	2.1658	0.00027691	0.0012698	0.050478	458	4	2.1658
Nabp2	5	0.9969	0.99689	1	17796	0	0.71298	0.00027899	0.0012843	0.050942	459	5	0.71298
Ccar1	5	0.93626	0.93655	1	15774	0	0.97481	0.00027913	0.001287	0.050942	460	4	0.97481
Fxn	5	0.99327	0.9933	1	17566	0	1.1098	0.00028127	0.0012961	0.051194	461	4	1.1098
Grwd1	5	0.99972	0.99971	1	18111	0	0.72492	0.00028389	0.001309	0.051593	462	5	0.72492
Ola1	5	0.99972	0.99971	1	18110	0	1.0288	0.00028495	0.0013176	0.051622	463	5	1.0288
Xylt2	5	0.99971	0.99971	1	18109	0	0.53409	0.00028515	0.0013176	0.051622	464	5	0.53409
Prdm10	5	0.82163	0.83175	1	13609	1	0.19893	0.00028539	0.0013182	0.051622	465	4	0.19893
Smc3	5	0.62363	0.72859	1	11558	1	1.2303	0.00028722	0.0013246	0.051765	466	4	1.2303
Sdhc	5	0.9989	0.99889	1	17974	0	1.7039	0.00029057	0.0013424	0.052347	467	5	1.7039
Ist1	5	0.99971	0.9997	1	18108	0	0.94153	0.00029157	0.0013483	0.052467	468	5	0.94153
Arntl	5	0.99961	0.99961	1	18091	0	0.91861	0.00029284	0.0013548	0.052607	469	5	0.91861
Atp6v0e	5	0.9997	0.9997	1	18107	0	0.99846	0.00029793	0.0013741	0.053246	470	5	0.99846
Psmb2	5	0.82791	0.83629	1	13711	1	1.3449	0.00031259	0.0014446	0.055696	471	3	1.3449
Plekha7	5	0.84081	0.84606	1	13910	1	0.66669	0.00031356	0.0014478	0.055696	472	4	0.66669
Nop2	5	0.99961	0.9996	1	18089	0	1.206	0.00031402	0.0014494	0.055696	473	5	1.206
Tbc1d10c	5	0.99968	0.99968	1	18106	0	0.63629	0.00031716	0.0014591	0.055816	474	5	0.63629
Maml1	4	0.99968	0.99967	1	18105	0	0.59069	0.00031809	0.00116	0.047766	475	4	0.59069
Clpb	5	0.96971	0.96981	1	16662	0	0.71694	0.00031952	0.0014666	0.055816	476	4	0.71694
Exoc7	5	0.9914	0.99148	1	17473	0	1.1	0.00031983	0.0014672	0.055816	477	4	1.1
Rsf1	5	0.99315	0.99318	1	17559	0	0.71675	0.00031998	0.0014677	0.055816	478	4	0.71675
Tfap2a	5	0.96141	0.9616	1	16443	0	0.72478	0.00032013	0.0014677	0.055816	479	4	0.72478
Uvrag	5	0.91997	0.92031	1	15425	0	0.99257	0.00032191	0.0014763	0.056027	480	4	0.99257
Zfp628	5	0.98416	0.98426	1	17162	0	0.98213	0.0003228	0.0014817	0.056116	481	4	0.98213
Bod1l	5	0.99944	0.99942	1	18053	0	0.91989	0.00032743	0.0015005	0.056712	482	5	0.91989
Tnfaip3	5	0.71389	0.76828	1	12343	1	1.333	0.00032975	0.0015108	0.05689	483	4	1.333
Mrfap1	5	0.99967	0.99967	1	18103	0	0.59916	0.00033061	0.0015129	0.05689	484	5	0.59916
Rrp8	5	0.99967	0.99967	1	18102	0	0.52889	0.00033107	0.0015145	0.05689	485	5	0.52889
Rin1	4	0.99967	0.99966	1	18101	0	0.728	0.00033194	0.0012074	0.048841	486	4	0.728
Mettl14	5	0.99105	0.99113	1	17459	0	1.6048	0.00033612	0.001542	0.057803	487	4	1.6048
Uhrf1	5	0.99965	0.99965	1	18100	0	0.66211	0.00035068	0.0016035	0.059868	488	5	0.66211
Rtel1	5	0.98831	0.98836	1	17331	0	0.92679	0.00035403	0.0016156	0.060176	489	4	0.92679
Ccs	5	0.99899	0.99898	1	17985	0	0.77536	0.00035485	0.0016183	0.060176	490	5	0.77536
Rlbp1	5	0.99964	0.99964	1	18099	0	0.43477	0.00035615	0.0016237	0.060254	491	5	0.43477
Sod2	5	0.91836	0.91866	1	15393	0	1.1037	0.00036103	0.0016452	0.06093	492	4	1.1037
Erc1	5	0.99964	0.99963	1	18098	0	0.69065	0.0003647	0.0016624	0.061412	493	5	0.69065
Cdh8	5	0.99963	0.99963	1	18097	0	0.71621	0.0003658	0.00167	0.061412	494	5	0.71621
Banp	5	0.99932	0.99931	1	18027	0	0.6742	0.00036595	0.0016705	0.061412	495	5	0.6742
Dna2	5	0.99963	0.99963	1	18096	0	0.7262	0.00036674	0.0016716	0.061412	496	5	0.7262
Hinfp	5	0.99935	0.99933	1	18038	0	1.2379	0.00036997	0.0016856	0.061802	497	5	1.2379
Paxip1	5	0.99682	0.99681	1	17790	0	0.95024	0.00037283	0.0016947	0.061891	498	5	0.95024
Josd1	5	0.99963	0.99962	1	18095	0	0.7459	0.00037363	0.0016985	0.061906	499	5	0.7459
Ncoa2	5	0.99962	0.99962	1	18093	0	0.62227	0.00037682	0.0017125	0.062292	500	5	0.62227
Ufc1	5	0.99839	0.99839	1	17915	0	1.2006	0.00039289	0.0017878	0.064903	501	5	1.2006
Cdk6	4	0.9996	0.9996	1	18088	0	1.1188	0.00039756	0.0014397	0.055672	502	4	1.1188
Cops4	5	0.95104	0.95129	1	16158	0	1.5867	0.00039964	0.0018179	0.065628	503	4	1.5867
Slirp	5	0.99933	0.99932	1	18030	0	0.63921	0.00039983	0.0018184	0.065628	504	5	0.63921
Gpn1	5	0.99949	0.99948	1	18062	0	1.8532	0.00040363	0.00184	0.066275	505	5	1.8532
Skp2	5	0.99959	0.99958	1	18087	0	0.74689	0.00040814	0.0018615	0.066919	506	5	0.74689
Syce2	5	0.99959	0.99958	1	18086	0	0.63356	0.00040933	0.0018701	0.067097	507	5	0.63356
AI846148	5	0.99959	0.99958	1	18085	0	0.58438	0.00041097	0.0018819	0.06739	508	5	0.58438
Zbtb45	5	0.99959	0.99958	1	18084	0	0.61604	0.00041217	0.0018878	0.067471	509	5	0.61604
Mybpc2	5	0.99959	0.99957	1	18083	0	0.49786	0.00041481	0.0018986	0.067711	510	5	0.49786
Mybbp1a	5	0.99931	0.99929	1	18024	0	1.098	0.00041669	0.0019024	0.067711	511	5	1.098
Ptar1	5	0.99958	0.99957	1	18082	0	0.64228	0.00041707	0.0019056	0.067711	512	5	0.64228
Lrcol1	5	0.46861	0.61923	1	9693	1	0.73448	0.00041884	0.0019147	0.067905	513	4	0.73448
Trmt6	5	0.50086	0.64745	1	10151	1	0.9752	0.00042091	0.0019244	0.068117	514	4	0.9752
Trappc6a	5	0.99957	0.99956	1	18079	0	0.55247	0.00042503	0.0019481	0.068822	515	5	0.55247
Skp1a	4	0.99632	0.99634	1	17751	0	1.7696	0.00042639	0.0015463	0.057846	516	4	1.7696
Emc6	5	0.99957	0.99956	1	18078	0	0.85562	0.00042705	0.0019567	0.068994	517	5	0.85562
Snd1	5	0.99957	0.99956	1	18076	0	0.73754	0.00043249	0.0019841	0.069828	518	5	0.73754
Taf1b	5	0.99957	0.99956	1	18075	0	0.83822	0.0004342	0.00199	0.069902	519	5	0.83822
Ppan	5	0.84945	0.85291	1	14066	1	1.2512	0.00043725	0.0020046	0.070182	520	4	1.2512
Noc3l	5	0.99956	0.99954	1	18074	0	0.79844	0.00044213	0.0020309	0.070932	521	5	0.79844
Yeats2	5	0.99955	0.99953	1	18073	0	1.2312	0.00044913	0.002061	0.071806	522	5	1.2312
Orc4	7	0.99955	0.99955	1	18072	0	1.1057	0.00044961	0.0026711	0.08595	523	7	1.1057
Ctdnep1	5	0.99316	0.99319	1	17560	0	0.9938	0.0004498	0.0020637	0.071806	524	4	0.9938
Xpo4	5	0.99955	0.99953	1	18071	0	0.78421	0.00045183	0.0020723	0.071908	525	5	0.78421
Dagla	5	0.97197	0.97207	1	16732	0	0.61803	0.00045226	0.0020745	0.071908	526	4	0.61803
Imp3	5	0.54896	0.69044	1	10862	1	0.66043	0.00045489	0.0020869	0.072201	527	3	0.66043
Zdhhc16	5	0.62656	0.72975	1	11587	1	0.93881	0.00046046	0.0021078	0.07279	528	4	0.93881
Rragc	5	0.99954	0.99952	1	18070	0	1.0034	0.00046206	0.0021186	0.073024	529	5	1.0034
Bola2	4	0.99372	0.99373	1	17586	0	1.0581	0.00046282	0.0016893	0.061817	530	4	1.0581
Ube2g2	5	0.99953	0.99951	1	18068	0	0.68122	0.0004679	0.0021412	0.073665	531	5	0.68122
Scgb2b7	2	0.99953	0.99953	1	18067	0	1.2934	0.00046855	0.00092065	0.040202	532	2	1.2934
Mettl3	5	0.90401	0.9044	1	15103	0	1.2113	0.0004718	0.0021595	0.074018	533	3	1.2113
Slc15a3	5	0.99953	0.99951	1	18066	0	0.43524	0.00047186	0.0021595	0.074018	534	5	0.43524
Rpp14	5	0.99687	0.99686	1	17793	0	1.5856	0.00047287	0.0021665	0.074119	535	5	1.5856
Mcm3ap	5	0.99952	0.99951	1	18065	0	0.62342	0.00047719	0.0021907	0.074809	536	5	0.62342
Pold4	5	0.99123	0.99132	1	17465	0	0.71136	0.00048072	0.0022047	0.075147	537	4	0.71136
Crxos1	9	0.99096	0.9911	1	17454	0	0.42422	0.00048389	0.0031396	0.095358	538	8	0.42422
Ddx6	5	0.79778	0.8154	1	13272	1	1.2823	0.00048489	0.0022213	0.075575	539	4	1.2823
Lsm11	5	0.95674	0.95699	1	16315	0	1.3066	0.00048665	0.0022294	0.075704	540	4	1.3066
Smarce1	2	0.99951	0.99951	1	18064	0	1.5113	0.00048811	0.00096638	0.041698	541	2	1.5113
Sbds	5	0.99947	0.99944	1	18057	0	1.3156	0.00048843	0.0022345	0.075704	542	5	1.3156
Tarm1	5	0.93764	0.93788	1	15802	0	1.3641	0.0004893	0.0022375	0.075704	543	4	1.3641
Emc2	5	0.81658	0.82826	1	13524	1	0.92113	0.00049183	0.0022482	0.075929	544	4	0.92113
Eny2	4	0.98243	0.98253	1	17095	0	1.2531	0.00049197	0.0017969	0.065107	545	3	1.2531
Zfp513	5	0.9995	0.99948	1	18063	0	0.45093	0.00050059	0.0022956	0.077385	546	5	0.45093
Mrpl52	5	0.99599	0.99598	1	17730	0	0.83388	0.00050399	0.0023117	0.077787	547	5	0.83388
Samd4b	5	0.99949	0.99947	1	18061	0	0.61119	0.00051182	0.002344	0.078729	548	5	0.61119
Asf1b	5	0.98572	0.98582	1	17222	0	0.88354	0.00051472	0.0023526	0.078874	549	4	0.88354
Cdk4	5	0.99714	0.99713	1	17816	0	0.79973	0.00051779	0.0023671	0.079217	550	5	0.79973
Slc12a7	5	0.99948	0.99946	1	18060	0	0.49271	0.00051955	0.002372	0.079235	551	5	0.49271
Lmln	5	0.99948	0.99945	1	18059	0	0.51115	0.00052259	0.0023838	0.079486	552	5	0.51115
Med30	5	0.99864	0.99862	1	17934	0	1.3059	0.00052485	0.002394	0.079682	553	5	1.3059
Copg1	5	0.84057	0.84587	1	13902	1	1.5513	0.000526	0.0023989	0.079699	554	4	1.5513
Smad1	5	0.79114	0.81119	1	13195	1	0.75339	0.00052963	0.0024166	0.080051	555	4	0.75339
Epb4.1l2	5	0.942	0.94224	1	15918	0	0.87345	0.000531	0.0024225	0.080051	556	4	0.87345
C030046E11Rik	5	0.9823	0.98242	1	17091	0	1.8061	0.00053168	0.0024236	0.080051	557	4	1.8061
Cyld	5	0.99947	0.99944	1	18058	0	0.90776	0.00053246	0.0024268	0.080051	558	5	0.90776
Rbm25	5	0.99946	0.99943	1	18056	0	0.79118	0.00054261	0.0024769	0.081458	559	5	0.79118
Tmem150b	5	0.99946	0.99943	1	18055	0	0.80048	0.00054398	0.0024812	0.081458	560	5	0.80048
Mapkapk2	5	0.99888	0.99887	1	17968	0	0.66809	0.00054452	0.0024828	0.081458	561	5	0.66809
Sh3pxd2a	5	0.99945	0.99943	1	18054	0	0.47753	0.00054864	0.0024995	0.081784	562	5	0.47753
Dscc1	5	0.99727	0.99727	1	17827	0	1.3953	0.00054942	0.0025016	0.081784	563	5	1.3953
Ccnd1	5	0.99605	0.99602	1	17732	0	1.3844	0.00055499	0.0025234	0.082231	564	5	1.3844
Atp6ap2	5	0.99878	0.99877	1	17952	0	1.4198	0.0005552	0.0025242	0.082231	565	5	1.4198
Med28	5	0.84048	0.84579	1	13901	1	1.6047	0.00055737	0.002536	0.08247	566	3	1.6047
Fosb	5	0.99942	0.9994	1	18051	0	0.66081	0.00057752	0.0026226	0.085136	567	5	0.66081
Mier2	5	0.99942	0.9994	1	18050	0	0.53843	0.00058075	0.0026355	0.085405	568	5	0.53843
Fam136a	5	0.99942	0.99939	1	18049	0	0.49008	0.00058299	0.0026468	0.08562	569	5	0.49008
Rraga	5	0.87546	0.87609	1	14533	1	0.95899	0.00058441	0.0026533	0.085678	570	4	0.95899
Cln3	5	0.9965	0.99648	1	17763	0	0.66145	0.0005879	0.0026689	0.08595	571	5	0.66145
Cdc7	5	0.98541	0.98553	1	17208	0	1.7641	0.00059081	0.0026791	0.086059	572	4	1.7641
Aup1	5	0.98305	0.98314	1	17117	0	0.55837	0.00059614	0.0027023	0.086517	573	4	0.55837
Ccm2	5	0.9994	0.99938	1	18047	0	0.52672	0.00059633	0.0027028	0.086517	574	5	0.52672
Raf1	5	0.95226	0.9525	1	16185	0	0.78121	0.00059833	0.0027141	0.086664	575	4	0.78121
Ppp1r13l	5	0.9994	0.99938	1	18046	0	0.67956	0.00059876	0.0027168	0.086664	576	5	0.67956
Bcr	5	0.9994	0.99937	1	18045	0	0.70484	0.00060179	0.0027281	0.086741	577	5	0.70484
Pfdn1	5	0.36996	0.53458	1	8393	1	0.99789	0.00060186	0.0027286	0.086741	578	3	0.99789
Prickle2	5	0.9994	0.99937	1	18044	0	0.62745	0.00060402	0.0027383	0.086898	579	5	0.62745
Tssc1	5	0.69685	0.76006	1	12185	1	1.049	0.00061039	0.0027657	0.087467	580	4	1.049
Gal	5	0.99922	0.99922	1	18014	0	0.68593	0.00062012	0.002805	0.088557	581	5	0.68593
Eif3d	5	0.99638	0.99635	1	17753	0	1.0984	0.00062399	0.002826	0.089067	582	5	1.0984
Prkd3	5	0.99937	0.99935	1	18041	0	0.78281	0.00062903	0.0028523	0.089744	583	5	0.78281
Il21r	5	0.99937	0.99935	1	18040	0	0.49289	0.00063272	0.0028706	0.090165	584	5	0.49289
Ipo5	5	0.95541	0.95567	1	16276	0	0.82985	0.00064441	0.0029212	0.091597	585	4	0.82985
Fem1c	5	0.92643	0.92673	1	15553	0	0.80692	0.00064705	0.0029336	0.091807	586	3	0.80692
Mzf1	5	0.99935	0.99933	1	18039	0	0.59643	0.00064791	0.0029379	0.091807	587	5	0.59643
Kcp	5	0.99935	0.99933	1	18037	0	0.62726	0.00065153	0.0029551	0.092073	588	5	0.62726
Wdr25	5	0.87318	0.8739	1	14491	1	0.94502	0.00065249	0.0029588	0.092073	589	4	0.94502
Atp5a1	5	0.074496	0.18316	0.962301	3448	1	1.3156	0.00065375	0.0029631	0.092073	590	4	1.3156
Hmgb1	1	0.99935	0.99938	1	18036	0	4.1399	0.00065391	0.00065976	0.03146	591	1	4.1399
Kdelr2	5	0.99886	0.99886	1	17964	0	0.75628	0.00065466	0.0029664	0.092073	592	5	0.75628
Zfp646	5	0.8261	0.83497	1	13686	1	0.66489	0.0006599	0.0029917	0.092612	593	4	0.66489
Braf	5	0.99934	0.99932	1	18035	0	0.67373	0.0006601	0.0029938	0.092612	594	5	0.67373
Mthfsd	5	0.99934	0.99932	1	18033	0	0.42215	0.00066218	0.0030013	0.092689	595	5	0.42215
Asf1a	5	0.94389	0.94414	1	15977	0	0.86254	0.00066349	0.0030078	0.092733	596	4	0.86254
Brd9	5	0.99933	0.99932	1	18031	0	0.45077	0.00066523	0.0030196	0.092942	597	5	0.45077
Rnf146	5	0.94837	0.94865	1	16085	0	0.94284	0.00067036	0.0030417	0.093464	598	3	0.94284
Batf2	5	0.99932	0.99931	1	18029	0	0.44541	0.00067541	0.0030637	0.093928	599	5	0.44541
Rad51	5	0.9978	0.99778	1	17871	0	1.2175	0.00067619	0.003067	0.093928	600	5	1.2175
Arap1	5	0.41556	0.57353	1	8967	1	0.72568	0.00067847	0.003074	0.093985	601	4	0.72568
Hps5	5	0.91525	0.91553	1	15327	0	0.99139	0.00068316	0.0030944	0.094453	602	3	0.99139
Retsat	5	0.99931	0.9993	1	18026	0	0.53309	0.00068595	0.0031062	0.094658	603	5	0.53309
Chmp3	5	0.93401	0.93427	1	15715	0	1.0669	0.00069278	0.0031315	0.09527	604	4	1.0669
Acsl1	5	0.99875	0.99875	1	17946	0	0.63745	0.00069605	0.003146	0.095397	605	5	0.63745
Gmfg	5	0.9993	0.99928	1	18023	0	0.59371	0.00070064	0.003167	0.095875	606	5	0.59371
Lsm4	5	0.9993	0.99928	1	18022	0	1.1398	0.00070316	0.0031772	0.096027	607	5	1.1398
Top1	5	0.99929	0.99927	1	18021	0	1.1359	0.00071142	0.0032084	0.096811	608	5	1.1359
Dcaf15	5	0.90537	0.90577	1	15131	0	0.6514	0.00071244	0.0032149	0.096847	609	4	0.6514
Ighmbp2	5	0.99928	0.99926	1	18020	0	0.64846	0.00071891	0.003245	0.097451	610	5	0.64846
Smc1a	5	0.92866	0.92898	1	15607	0	1.4857	0.0007192	0.0032456	0.097451	611	3	1.4857
Car11	5	0.22441	0.40906	1	6547	1	0.8025	0.00072376	0.0032638	0.097682	612	4	0.8025
Ap3s2	5	0.97221	0.97232	1	16741	0	1.1307	0.00072544	0.0032708	0.097732	613	4	1.1307
Noc2l	5	0.99927	0.99926	1	18019	0	0.94836	0.00072767	0.0032816	0.097895	614	5	0.94836
Rfwd3	5	0.99927	0.99926	1	18018	0	0.61104	0.00072853	0.0032886	0.097945	615	5	0.61104
Nek9	5	0.99926	0.99924	1	18017	0	0.86929	0.00074	0.0033429	0.099273	616	5	0.86929
Tnrc6a	5	0.49922	0.64602	1	10129	2	0.96717	0.00074037	0.003344	0.099273	617	3	0.96717
Slc10a7	5	0.94661	0.94686	1	16042	0	1.2406	0.00075817	0.0034171	0.101119	618	4	1.2406
Spata2	5	0.99923	0.99922	1	18016	0	0.63447	0.00076967	0.0034661	0.102239	619	5	0.63447
Rad21	5	0.99923	0.99922	1	18015	0	0.7091	0.00076967	0.0034661	0.102239	620	5	0.7091
Alg10b	5	0.99256	0.99263	1	17529	0	0.97879	0.00077787	0.0035043	0.1032	621	4	0.97879
Trib1	5	0.99753	0.99751	1	17850	0	0.55309	0.00079899	0.003599	0.10565	622	5	0.55309
Atp4a	5	0.78892	0.8098	1	13157	1	0.76328	0.00080266	0.0036151	0.105955	623	4	0.76328
Sult2a1	5	0.95174	0.95198	1	16172	0	0.93461	0.00080624	0.003635	0.106177	624	4	0.93461
Furin	5	0.99919	0.99919	1	18013	0	0.50332	0.00080654	0.0036361	0.106177	625	5	0.50332
Gm581	5	0.99256	0.99263	1	17528	0	0.71048	0.0008084	0.0036431	0.106177	626	4	0.71048
Rttn	5	0.62434	0.72887	1	11564	1	0.6183	0.00080901	0.0036458	0.106177	627	4	0.6183
Vmn1r169	5	0.99252	0.99258	1	17526	0	0.65245	0.00081727	0.003678	0.106842	628	4	0.65245
Grk1	5	0.99918	0.99919	1	18012	0	0.62319	0.00081774	0.0036802	0.106842	629	5	0.62319
Rasgrp2	5	0.96335	0.96356	1	16492	0	0.66729	0.00081881	0.0036866	0.106861	630	4	0.66729
Tmem151a	5	0.99567	0.99565	1	17698	0	0.71511	0.00082499	0.0037082	0.107315	631	5	0.71511
Copz1	5	0.99576	0.99574	1	17708	0	1.2277	0.00083026	0.0037351	0.107848	632	5	1.2277
Ears2	5	0.99917	0.99917	1	18011	0	1.2161	0.00083109	0.0037383	0.107848	633	5	1.2161
Eif3h	5	0.99691	0.9969	1	17798	0	0.81206	0.0008365	0.0037646	0.108378	634	5	0.81206
Prkd2	5	0.99916	0.99916	1	18010	0	0.5112	0.00083763	0.0037716	0.108378	635	5	0.5112
Gnl2	5	0.99916	0.99916	1	18009	0	1.2262	0.00083821	0.0037743	0.108378	636	5	1.2262
Cyb5b	5	0.99915	0.99915	1	18008	0	0.43335	0.00084548	0.0037996	0.108934	637	5	0.43335
Atp2c1	5	0.99915	0.99915	1	18007	0	0.40379	0.00085222	0.003826	0.109519	638	5	0.40379
Hnrnpul2	5	0.72578	0.77418	1	12469	1	0.77229	0.00085573	0.0038373	0.109672	639	4	0.77229
Npepps	5	0.99914	0.99914	1	18005	0	0.80829	0.00086008	0.0038577	0.110085	640	5	0.80829
Mprip	5	0.79409	0.81303	1	13232	1	0.8302	0.00086178	0.0038655	0.110137	641	4	0.8302
Lrfn4	5	0.99893	0.99892	1	17979	0	0.66486	0.00086402	0.0038733	0.110189	642	5	0.66486
Aspdh	5	0.99913	0.99913	1	18004	0	0.42314	0.0008679	0.0038873	0.110307	643	5	0.42314
B4galnt1	5	0.92764	0.92795	1	15580	0	0.61992	0.00086852	0.0038894	0.110307	644	4	0.61992
Gnaq	5	0.99913	0.99912	1	18003	0	0.62121	0.00087477	0.0039147	0.110853	645	5	0.62121
Ovol1	5	0.99912	0.99911	1	18002	0	0.46508	0.00088471	0.0039583	0.111743	646	5	0.46508
Gemin7	5	0.99911	0.99911	1	18001	0	0.44285	0.00088502	0.0039583	0.111743	647	5	0.44285
Exo1	5	0.9991	0.9991	1	18000	0	0.54774	0.00089617	0.0040083	0.112809	648	5	0.54774
Trpm4	5	0.9991	0.9991	1	17999	0	0.52445	0.00090107	0.0040288	0.113054	649	5	0.52445
Xrcc3	5	0.99887	0.99886	1	17965	0	1.0944	0.00090115	0.0040293	0.113054	650	5	1.0944
Heatr2	5	0.97597	0.97614	1	16851	0	0.68364	0.00090542	0.0040449	0.113272	651	4	0.68364
Psma2	4	0.13293	0.26685	1	4680	2	0.44059	0.00090766	0.003259	0.097682	652	2	0.44059
Dhx29	5	0.99909	0.99909	1	17998	0	0.71631	0.00090836	0.004053	0.113272	653	5	0.71631
Wasl	5	0.99653	0.9965	1	17767	0	0.64539	0.00091171	0.0040691	0.113272	654	5	0.64539
Wdr59	5	0.94809	0.94837	1	16078	0	0.59359	0.00091271	0.0040734	0.113272	655	4	0.59359
Ccdc137	5	0.99355	0.99357	1	17577	0	0.98513	0.00091277	0.004074	0.113272	656	4	0.98513
Rbbp5	5	0.99909	0.99908	1	17997	0	0.77539	0.00091363	0.0040745	0.113272	657	5	0.77539
Xrn2	5	0.99908	0.99908	1	17996	0	0.85049	0.00091518	0.0040804	0.113272	658	5	0.85049
Atp2a2	5	0.99477	0.99477	1	17640	0	1.2237	0.00091602	0.0040863	0.113272	659	5	1.2237
Strn4	5	0.99908	0.99908	1	17995	0	0.6077	0.00091819	0.0040965	0.113385	660	5	0.6077
Pinx1	5	0.90221	0.9026	1	15056	0	0.83195	0.0009258	0.0041374	0.11418	661	3	0.83195
Rnf139	5	0.99907	0.99907	1	17993	0	0.69568	0.00092863	0.004146	0.11418	662	5	0.69568
Mphosph6	5	0.99907	0.99907	1	17992	0	1.1326	0.00092915	0.0041482	0.11418	663	5	1.1326
Vpreb3	5	0.8484	0.85206	1	14043	1	0.69725	0.00092949	0.0041501	0.11418	664	4	0.69725
Nmd3	4	0.92469	0.92489	1	15512	0	1.7732	0.00093996	0.0033773	0.100102	665	3	1.7732
Rnh1	5	0.99906	0.99906	1	17991	0	0.73138	0.00094054	0.004202	0.115435	666	5	0.73138
Ms4a18	5	0.99519	0.99517	1	17669	0	0.6712	0.0009465	0.0042343	0.116149	667	5	0.6712
Best1	5	0.99905	0.99905	1	17990	0	0.54975	0.00095075	0.0042515	0.116447	668	5	0.54975
Nop9	5	0.99609	0.99607	1	17735	0	0.97834	0.00095233	0.004259	0.11648	669	5	0.97834
Med23	5	0.8734	0.8741	1	14494	1	0.87156	0.00095487	0.0042724	0.116575	670	4	0.87156
Cmpk1	5	0.54442	0.68633	1	10796	1	1.182	0.00096131	0.0042977	0.117018	671	4	1.182
Rnaseh2b	5	0.63072	0.73141	1	11619	1	1.3316	0.00096358	0.0043079	0.117063	672	4	1.3316
Ylpm1	5	0.90851	0.90889	1	15192	0	0.97049	0.00096559	0.0043182	0.117063	673	4	0.97049
Fau	5	0.99903	0.99903	1	17989	0	0.95978	0.00096808	0.00433	0.117063	674	5	0.95978
Magoh	5	0.99099	0.99107	1	17456	0	0.90431	0.00096907	0.0043343	0.117063	675	4	0.90431
Dcps	5	0.27061	0.45177	1	7152	1	1.0395	0.0009693	0.0043354	0.117063	676	3	1.0395
Pcnt	5	0.99903	0.99903	1	17988	0	0.50723	0.00096981	0.0043375	0.117063	677	5	0.50723
Slc25a45	5	0.90424	0.90464	1	15112	0	0.91538	0.0009825	0.0044085	0.118631	678	3	0.91538
Scgb2b3	5	0.82464	0.83388	1	13662	1	0.90624	0.00098542	0.0044214	0.118631	679	4	0.90624
Armc10	5	0.99901	0.99901	1	17987	0	0.38451	0.0009915	0.0044408	0.118977	680	5	0.38451
Dpm1	5	0.97639	0.97654	1	16877	0	0.93351	0.00099392	0.0044516	0.118977	681	4	0.93351
B3gnt8	5	0.99804	0.99803	1	17879	0	0.70198	0.00099479	0.0044537	0.118977	682	5	0.70198
Med11	5	0.95345	0.9537	1	16218	0	1.6217	0.00099732	0.0044645	0.119092	683	3	1.6217
Lrfn3	5	0.96788	0.96805	1	16606	0	0.5539	0.0010032	0.0044865	0.119507	684	4	0.5539
Stt3b	5	0.95355	0.9538	1	16220	0	0.93609	0.0010065	0.0045005	0.119706	685	4	0.93609
Smc6	5	0.98954	0.98962	1	17398	0	1.0864	0.0010111	0.0045226	0.119946	686	4	1.0864
Mcmbp	5	0.99899	0.99898	1	17984	0	0.6152	0.0010137	0.0045344	0.120087	687	5	0.6152
Polr3e	5	0.24887	0.43388	1	6896	2	0.69541	0.001026	0.0045882	0.121163	688	3	0.69541
Rnf217	5	0.99897	0.99897	1	17983	0	0.36793	0.0010295	0.0046092	0.121542	689	5	0.36793
V1rd19	5	0.78292	0.80612	1	13082	1	0.55742	0.0010326	0.0046242	0.121765	690	4	0.55742
Ms4a13	5	0.99897	0.99896	1	17982	0	0.50847	0.0010344	0.0046345	0.121841	691	5	0.50847
Fdft1	5	0.91057	0.91095	1	15236	0	0.7551	0.0010358	0.0046404	0.121841	692	3	0.7551
Rpl3	2	0.99896	0.99895	1	17981	0	2.5948	0.0010371	0.0020056	0.070182	693	2	2.5948
Pfdn2	5	0.98678	0.98684	1	17268	0	1.384	0.0010401	0.004663	0.12226	694	4	1.384
Gna11	5	0.92759	0.9279	1	15579	0	0.62728	0.0010453	0.0046934	0.122813	695	4	0.62728
Kctd10	5	0.68008	0.75232	1	12044	1	0.88795	0.001046	0.0046974	0.122813	696	4	0.88795
Ccdc85b	5	0.9935	0.99352	1	17576	0	0.81635	0.0010535	0.0047329	0.123447	697	4	0.81635
Fig4	5	0.99822	0.9982	1	17903	0	0.88288	0.0010567	0.0047474	0.123448	698	5	0.88288
Tmem57	5	0.9967	0.99668	1	17777	0	1.0284	0.001057	0.0047485	0.123448	699	5	1.0284
Zc3h7a	5	0.99894	0.99893	1	17980	0	0.52394	0.0010599	0.0047582	0.123525	700	5	0.52394
Rpn2	5	0.99893	0.99892	1	17978	0	1.011	0.0010732	0.0048131	0.124773	701	5	1.011
Fanci	5	0.99892	0.99892	1	17977	0	0.81867	0.0010758	0.0048303	0.124868	702	5	0.81867
Mknk2	5	0.98233	0.98244	1	17093	0	0.60216	0.0010758	0.0048303	0.124868	703	4	0.60216
Nagpa	5	0.99498	0.99498	1	17652	0	0.60526	0.0010894	0.0048937	0.126251	704	5	0.60526
Zfp574	5	0.97707	0.97721	1	16904	0	0.86021	0.0010932	0.0049136	0.126251	705	4	0.86021
Ubr5	5	0.9989	0.9989	1	17975	0	0.77173	0.0010953	0.0049201	0.126251	706	5	0.77173
Pole3	5	0.8401	0.84548	1	13896	1	1.5196	0.0010967	0.0049239	0.126251	707	4	1.5196
Sdhd	5	0.748	0.78585	1	12687	1	0.84809	0.001097	0.0049249	0.126251	708	4	0.84809
Dctn1	5	0.80475	0.82	1	13348	1	0.81012	0.0010987	0.0049319	0.126255	709	4	0.81012
Ssu72	4	0.86506	0.8651	1	14326	0	1.7226	0.0010999	0.0039658	0.111784	710	3	1.7226
Cux1	5	0.9989	0.99889	1	17973	0	0.43977	0.0011032	0.0049529	0.126616	711	5	0.43977
Morf4l1	5	0.99889	0.99889	1	17972	0	0.72085	0.0011051	0.0049621	0.126674	712	5	0.72085
Tsen15	5	0.99882	0.99882	1	17957	0	1.3015	0.0011077	0.0049782	0.126803	713	5	1.3015
Irf2bp1	5	0.99883	0.99882	1	17959	0	0.84277	0.0011085	0.0049809	0.126803	714	5	0.84277
Rhod	5	0.99889	0.99888	1	17970	0	0.81053	0.0011116	0.0049959	0.126936	715	5	0.81053
Sptssa	5	0.98432	0.98442	1	17170	0	0.75923	0.0011139	0.0050051	0.126936	716	4	0.75923
Hif1an	5	0.99888	0.99888	1	17969	0	0.76604	0.001115	0.0050094	0.126936	717	5	0.76604
Nr1h2	5	0.99568	0.99566	1	17702	0	0.67004	0.001116	0.0050137	0.126936	718	5	0.67004
Ppp1r7	5	0.24204	0.42827	1	6808	2	1.3456	0.0011195	0.005032	0.127203	719	3	1.3456
Rpl14	5	0.83818	0.84405	1	13867	1	1.5119	0.001124	0.0050444	0.127203	720	4	1.5119
Pcnxl3	5	0.99888	0.99887	1	17967	0	0.71253	0.0011248	0.0050471	0.127203	721	5	0.71253
Psmc2	5	0.75728	0.79094	1	12791	1	0.84296	0.0011255	0.0050519	0.127203	722	4	0.84296
Cdk19	5	0.99008	0.99013	1	17422	0	0.72111	0.0011349	0.0050933	0.12807	723	4	0.72111
Cct3	5	0.23055	0.41772	1	6653	1	1.4095	0.001138	0.0051078	0.12826	724	4	1.4095
Sephs2	5	0.99886	0.99885	1	17963	0	0.43038	0.0011435	0.0051342	0.128666	725	5	0.43038
Myrf	5	0.99885	0.99885	1	17962	0	0.71259	0.0011467	0.0051498	0.128666	726	5	0.71259
Foxd4	5	0.99885	0.99885	1	17961	0	0.37586	0.0011474	0.0051536	0.128666	727	5	0.37586
Birc2	5	0.438	0.5928	1	9274	1	0.88459	0.001149	0.0051589	0.128666	728	4	0.88459
Npm3	5	0.9988	0.99879	1	17954	0	0.64458	0.0011562	0.0051821	0.128893	729	5	0.64458
Fam49b	5	0.97408	0.97418	1	16799	0	1.0225	0.0011562	0.0051821	0.128893	730	4	1.0225
Heatr3	5	0.96863	0.96881	1	16638	0	1.11	0.0011584	0.0051918	0.128946	731	4	1.11
Ctdp1	5	0.90299	0.90339	1	15077	0	1.2564	0.0011599	0.0051982	0.128946	732	4	1.2564
Mesdc2	5	0.9453	0.94556	1	16008	0	0.74947	0.0011645	0.0052208	0.129225	733	4	0.74947
Zcchc4	5	0.99883	0.99883	1	17960	0	0.50395	0.0011652	0.0052235	0.129225	734	5	0.50395
Kif20b	5	0.48154	0.6305	1	9881	1	0.62085	0.0011701	0.0052423	0.129517	735	4	0.62085
Mtbp	5	0.34342	0.51224	1	8057	1	1.0008	0.0011846	0.0052961	0.130628	736	4	1.0008
Crebbp	5	0.99761	0.99758	1	17859	0	0.82027	0.0011854	0.0053015	0.130628	737	5	0.82027
Asxl2	5	0.99765	0.99763	1	17862	0	0.89464	0.0011882	0.0053149	0.130784	738	5	0.89464
Vgll4	5	0.99881	0.9988	1	17955	0	0.68635	0.0011913	0.0053252	0.130861	739	5	0.68635
Pigv	10	0.99754	0.99756	1	17851	0	0.479	0.0011968	0.0074785	0.165177	740	8	0.479
Gpr124	5	0.9988	0.99879	1	17953	0	0.34223	0.0011995	0.0053687	0.131756	741	5	0.34223
E430018J23Rik	5	0.84292	0.8477	1	13947	1	0.78644	0.0012028	0.0053843	0.131963	742	4	0.78644
Mis18a	5	0.95577	0.95603	1	16290	0	1.3475	0.0012064	0.005401	0.132195	743	3	1.3475
Ms4a10	5	0.99744	0.99743	1	17838	0	0.7257	0.0012121	0.0054268	0.132651	744	5	0.7257
Gltscr2	4	0.99543	0.99543	1	17686	0	1.3048	0.0012134	0.0043585	0.117456	745	4	1.3048
Wdr96	5	0.99864	0.99862	1	17933	0	0.50288	0.001218	0.0054494	0.133026	746	5	0.50288
Mbd2	5	0.99458	0.99459	1	17631	0	0.74771	0.001223	0.0054709	0.133375	747	5	0.74771
Pold1	5	0.99877	0.99877	1	17951	0	0.8455	0.0012252	0.0054801	0.133421	748	5	0.8455
Atp6v0b	5	0.99435	0.99437	1	17617	0	1.4403	0.0012278	0.0054903	0.133493	749	5	1.4403
Gstp2	4	0.99877	0.99875	1	17950	0	0.78688	0.0012314	0.0044198	0.118631	750	4	0.78688
1190005I06Rik	5	0.99877	0.99876	1	17949	0	0.42149	0.0012318	0.0055064	0.133709	751	5	0.42149
Mtmr6	5	0.99876	0.99875	1	17947	0	0.58223	0.0012394	0.0055344	0.134211	752	5	0.58223
Vps11	5	0.99665	0.99663	1	17773	0	0.66252	0.0012421	0.0055468	0.134334	753	5	0.66252
Smad4	5	0.96799	0.96815	1	16612	0	1.0984	0.0012468	0.0055715	0.134756	754	4	1.0984
A130010J15Rik	5	0.98998	0.99004	1	17416	0	0.91523	0.0012547	0.0056151	0.135632	755	4	0.91523
D030056L22Rik	4	0.99874	0.99872	1	17945	0	0.92231	0.0012625	0.0045204	0.119946	756	4	0.92231
Ccdc132	5	0.99694	0.99692	1	17801	0	0.86652	0.0012659	0.0056565	0.136453	757	5	0.86652
Ypel1	5	0.99873	0.99872	1	17944	0	0.5415	0.0012677	0.0056678	0.136547	758	5	0.5415
Npat	5	0.99872	0.99872	1	17943	0	1.0502	0.0012758	0.0057006	0.137158	759	5	1.0502
Arl2	5	0.98179	0.98192	1	17076	0	1.0687	0.001295	0.0057813	0.138918	760	4	1.0687
Rad23b	5	0.99869	0.99867	1	17941	0	0.65059	0.0013138	0.0058695	0.140786	761	5	0.65059
Mpi	5	0.99869	0.99867	1	17940	0	0.44515	0.0013146	0.0058744	0.140786	762	5	0.44515
Sys1	5	0.93945	0.93969	1	15848	0	1.1013	0.0013191	0.0058937	0.140922	763	4	1.1013
Ubap1	5	0.58278	0.7131	1	11269	1	0.80357	0.0013199	0.0058954	0.140922	764	4	0.80357
Gpatch2l	5	0.88454	0.88503	1	14715	0	0.6596	0.0013225	0.0059056	0.140983	765	4	0.6596
Rab6a	4	0.9968	0.99684	1	17787	0	1.6298	0.0013247	0.0047351	0.123447	766	4	1.6298
Nrip3	5	0.99867	0.99865	1	17938	0	0.77087	0.0013319	0.005947	0.141758	767	5	0.77087
BC049730	5	0.98284	0.98294	1	17107	0	0.65355	0.001334	0.0059535	0.141758	768	4	0.65355
Fam96b	5	0.43038	0.58624	1	9175	1	0.78931	0.0013466	0.0060035	0.142765	769	4	0.78931
Cpsf2	5	0.62615	0.72958	1	11581	1	0.78142	0.0013488	0.0060153	0.142862	770	4	0.78142
Gtf2b	5	0.99296	0.993	1	17547	0	1.2877	0.0013633	0.0060691	0.143711	771	4	1.2877
Ap5b1	5	0.75964	0.79231	1	12825	1	0.88453	0.0013653	0.0060745	0.143711	772	4	0.88453
Tsg101	4	0.99862	0.99859	1	17932	0	1.2479	0.001377	0.0049099	0.126251	773	4	1.2479
Med1	5	0.050345	0.14127	0.869429	2931	3	-0.24578	0.0013824	0.0061374	0.145013	774	2	-0.24578
Gga1	5	0.99861	0.9986	1	17931	0	0.52387	0.0013899	0.0061651	0.145295	775	5	0.52387
Trpt1	5	0.99133	0.99142	1	17470	0	0.8498	0.0014051	0.0062224	0.146457	776	4	0.8498
Six5	5	0.99859	0.99857	1	17929	0	0.42752	0.0014144	0.0062638	0.147195	777	5	0.42752
Lrrc56	5	0.99498	0.99498	1	17653	0	0.77605	0.0014156	0.0062697	0.147195	778	5	0.77605
Chmp4b	5	0.93889	0.93913	1	15832	0	1.0313	0.001426	0.006316	0.148092	779	4	1.0313
Asrgl1	5	0.99772	0.99769	1	17867	0	0.78973	0.0014286	0.0063268	0.148156	780	5	0.78973
Trpm6	5	0.99856	0.99855	1	17927	0	0.67997	0.0014369	0.0063617	0.148785	781	5	0.67997
Polr1d	10	0.98857	0.98867	1	17345	0	0.47295	0.0014422	0.0087899	0.180566	782	8	0.47295
Vps72	5	0.99856	0.99855	1	17926	0	0.55186	0.0014442	0.006394	0.149161	783	5	0.55186
Cab39	5	0.92283	0.92315	1	15478	0	0.64083	0.0014475	0.006408	0.149285	784	4	0.64083
Snx15	5	0.99855	0.99854	1	17925	0	0.38119	0.0014488	0.0064155	0.149285	785	5	0.38119
Tbc1d10b	5	0.99855	0.99854	1	17924	0	0.52685	0.001453	0.0064284	0.149396	786	5	0.52685
Gsdmcl1	5	0.99854	0.99853	1	17923	0	0.92463	0.0014587	0.0064569	0.14983	787	5	0.92463
Psmd14	5	0.99651	0.99648	1	17764	0	1.3087	0.00146	0.0064634	0.14983	788	5	1.3087
Nlrp4a	5	0.75252	0.7883	1	12740	1	1.0116	0.0014741	0.0065161	0.150668	789	4	1.0116
Rras2	5	0.96644	0.96665	1	16572	0	0.60611	0.0014753	0.0065199	0.150668	790	4	0.60611
Mzt2	5	0.93521	0.93548	1	15747	0	0.83515	0.0014794	0.0065306	0.150668	791	4	0.83515
Arfip2	5	0.98169	0.98182	1	17072	0	0.5265	0.00148	0.0065323	0.150668	792	4	0.5265
Bora	5	0.99852	0.99851	1	17922	0	0.36418	0.0014831	0.0065489	0.150863	793	5	0.36418
Oscar	5	0.7049	0.76394	1	12262	1	0.71635	0.0014857	0.0065608	0.150907	794	4	0.71635
Fam175b	5	0.97282	0.97292	1	16757	0	0.79094	0.0014963	0.0066097	0.151694	795	3	0.79094
Smndc1	5	0.92093	0.92128	1	15451	0	0.75989	0.0015029	0.006642	0.152245	796	3	0.75989
Srbd1	5	0.99849	0.99848	1	17921	0	0.95152	0.0015147	0.006692	0.153201	797	5	0.95152
1700018F24Rik	5	0.99847	0.99847	1	17919	0	0.38441	0.0015262	0.0067399	0.154105	798	5	0.38441
Zfp428	5	0.99847	0.99847	1	17918	0	0.60665	0.0015308	0.0067619	0.154417	799	5	0.60665
Fen1	5	0.99846	0.99846	1	17917	0	0.68874	0.0015366	0.0067819	0.15468	800	5	0.68874
Prkcg	5	0.49684	0.6439	1	10089	1	0.82594	0.001545	0.006819	0.155252	801	3	0.82594
Map4k2	5	0.99554	0.99554	1	17690	0	1.1626	0.001546	0.0068238	0.155252	802	5	1.1626
Met	5	0.99844	0.99844	1	17916	0	0.62845	0.0015554	0.0068636	0.155965	803	5	0.62845
Mcm3	5	0.99401	0.99402	1	17597	0	0.89529	0.0015633	0.0068873	0.15631	804	5	0.89529
Atic	5	0.99157	0.99164	1	17482	0	0.91234	0.0015744	0.0069346	0.15719	805	4	0.91234
Dctn5	5	0.85587	0.85827	1	14169	1	1.4546	0.0015781	0.0069465	0.157242	806	3	1.4546
Klk1b27	3	0.98462	0.9848	1	17181	0	1.389	0.0015973	0.0045543	0.120441	807	3	1.389
Hras1	5	0.97939	0.97952	1	16986	0	0.86125	0.0015974	0.0070277	0.158713	808	4	0.86125
Sdhaf1	5	0.31235	0.4863	1	7664	1	0.67729	0.0015989	0.0070417	0.158834	809	4	0.67729
Lgals1	5	0.95572	0.95597	1	16287	0	0.88936	0.0016219	0.0071358	0.160564	810	4	0.88936
U2af2	5	0.99711	0.9971	1	17813	0	0.76662	0.0016283	0.0071589	0.160888	811	5	0.76662
Tmem169	5	0.99837	0.99836	1	17914	0	0.40359	0.0016323	0.0071778	0.161114	812	5	0.40359
Rnaseh2a	5	0.97166	0.97178	1	16723	0	0.98881	0.0016351	0.0071912	0.161144	813	4	0.98881
Tomm40	5	0.99836	0.99836	1	17913	0	0.62078	0.0016362	0.0071966	0.161144	814	5	0.62078
Phf23	5	0.90561	0.906	1	15138	0	-0.015316	0.0016507	0.0072601	0.162368	815	2	-0.015316
Wdr92	5	0.98179	0.98192	1	17077	0	1.0453	0.0016541	0.0072778	0.162567	816	4	1.0453
Cdca5	5	0.9758	0.97596	1	16847	0	0.68565	0.0016632	0.0073165	0.163037	817	4	0.68565
Bcs1l	5	0.99833	0.99833	1	17912	0	0.85505	0.0016656	0.0073289	0.163115	818	5	0.85505
Pga5	5	0.97598	0.97615	1	16852	0	0.70669	0.0016783	0.0073768	0.163982	819	4	0.70669
Slc27a5	5	0.49074	0.63853	1	10011	1	0.63761	0.0016835	0.007401	0.164322	820	4	0.63761
Pign	5	0.84455	0.84897	1	13976	1	0.90304	0.0016867	0.0074144	0.164422	821	4	0.90304
Ermp1	5	0.9983	0.99829	1	17911	0	0.50584	0.0016992	0.0074693	0.165177	822	5	0.50584
Tmc4	5	0.9735	0.97359	1	16777	0	0.57157	0.0017003	0.007472	0.165177	823	4	0.57157
Hist1h1e	4	0.98765	0.98767	1	17308	0	1.5283	0.0017008	0.0060535	0.143583	824	4	1.5283
Psmc1	5	0.3974	0.55805	1	8750	1	0.45958	0.0017035	0.0074844	0.165177	825	4	0.45958
Tex37	5	0.99829	0.99828	1	17910	0	0.47339	0.0017077	0.0075005	0.165335	826	5	0.47339
Slc7a6os	5	0.98445	0.98456	1	17174	0	1.0406	0.0017139	0.007522	0.165611	827	4	1.0406
Snx13	4	0.88855	0.88864	1	14801	0	1.2207	0.0017285	0.0061562	0.145272	828	2	1.2207
Med26	5	0.88705	0.88756	1	14764	0	0.89999	0.0017305	0.0075903	0.166915	829	4	0.89999
C330027C09Rik	5	0.95088	0.95113	1	16150	0	0.83526	0.0017364	0.0076199	0.167123	830	4	0.83526
Lrp5	5	0.89732	0.89773	1	14961	0	0.664	0.0017384	0.007628	0.167123	831	4	0.664
Mthfd1	5	0.63482	0.73309	1	11650	1	0.57013	0.001739	0.0076318	0.167123	832	4	0.57013
Pwp1	5	0.89017	0.89064	1	14832	0	0.62293	0.0017414	0.0076436	0.167123	833	3	0.62293
Metrnl	5	0.98419	0.98429	1	17163	0	0.71527	0.0017418	0.0076452	0.167123	834	4	0.71527
Ldb1	5	0.97261	0.97271	1	16751	0	1.0866	0.0017442	0.0076562	0.167166	835	4	1.0866
Crebzf	5	0.99825	0.99823	1	17907	0	0.43236	0.0017494	0.0076813	0.167513	836	5	0.43236
Uchl1	5	0.99823	0.99822	1	17906	0	0.44905	0.0017655	0.0077415	0.168627	837	5	0.44905
4930404N11Rik	5	0.99823	0.99821	1	17905	0	0.35049	0.0017697	0.0077625	0.168884	838	5	0.35049
Gpaa1	5	0.40879	0.56785	1	8887	1	0.68472	0.0017757	0.0077878	0.169047	839	4	0.68472
N6amt1	5	0.92402	0.92436	1	15496	0	1.4205	0.001776	0.0077883	0.169047	840	4	1.4205
Ska3	5	0.5788	0.71167	1	11246	1	0.6841	0.0017842	0.0078211	0.169345	841	4	0.6841
Tppp3	5	0.97895	0.97908	1	16976	0	0.76177	0.001785	0.0078238	0.169345	842	3	0.76177
Rps7	2	0.99821	0.99818	1	17902	0	1.9495	0.0017876	0.0035161	0.103383	843	2	1.9495
Ulbp1	5	0.99821	0.9982	1	17901	0	0.53035	0.0017881	0.0078389	0.169345	844	5	0.53035
Cdc42bpb	5	0.98286	0.98295	1	17109	0	0.62131	0.0017882	0.0078389	0.169345	845	4	0.62131
Col14a1	5	0.88704	0.88755	1	14763	0	0.64489	0.001791	0.0078539	0.169472	846	4	0.64489
Azi2	4	0.29824	0.43939	1	7493	1	0.87056	0.0017924	0.0063752	0.148911	847	3	0.87056
Taldo1	5	0.99819	0.99818	1	17900	0	0.51508	0.0018053	0.0079147	0.170575	848	5	0.51508
Snx32	5	0.99819	0.99818	1	17899	0	0.63692	0.0018073	0.0079255	0.170575	849	5	0.63692
Zfp580	5	0.99819	0.99818	1	17898	0	0.48298	0.0018094	0.0079346	0.170575	850	5	0.48298
Eif4a3	5	0.99819	0.99817	1	17896	0	1.3431	0.0018148	0.0079594	0.170746	851	5	1.3431
Ankrd13d	5	0.99818	0.99817	1	17895	0	0.54878	0.0018198	0.0079873	0.171147	852	5	0.54878
Kmt2e	5	0.99817	0.99816	1	17894	0	0.35466	0.0018261	0.0080099	0.171156	853	5	0.35466
Prr14l	5	0.47638	0.62596	1	9814	1	0.72038	0.001829	0.0080223	0.171156	854	4	0.72038
BC005764	5	0.99285	0.99289	1	17542	0	0.62665	0.0018295	0.008025	0.171156	855	4	0.62665
Nedd1	5	0.90025	0.90062	1	15017	0	0.9309	0.0018315	0.0080363	0.171199	856	3	0.9309
Syt12	5	0.99817	0.99815	1	17892	0	0.52651	0.0018348	0.0080503	0.171299	857	5	0.52651
Mrpl53	5	0.36718	0.53219	1	8354	1	0.66874	0.0018396	0.0080734	0.171592	858	4	0.66874
Gdpd5	5	0.99815	0.99814	1	17890	0	0.30095	0.0018455	0.0080944	0.17184	859	5	0.30095
Speer3	5	0.99815	0.99813	1	17889	0	0.48459	0.001852	0.0081261	0.172315	860	5	0.48459
Mgat4a	5	0.16503	0.32379	1	5353	2	0.30303	0.0018581	0.0081562	0.172653	861	3	0.30303
Lrrc6	5	0.94309	0.94333	1	15955	0	0.99375	0.0018594	0.0081654	0.172653	862	4	0.99375
Zscan5b	5	0.98978	0.98987	1	17407	0	0.67271	0.0018606	0.0081702	0.172653	863	4	0.67271
Lipa	5	0.99681	0.99679	1	17788	0	0.88018	0.0018683	0.0082014	0.172938	864	5	0.88018
Pam16	5	0.99813	0.99811	1	17888	0	0.91433	0.0018685	0.0082025	0.172938	865	5	0.91433
Incenp	5	0.98608	0.98616	1	17238	0	0.85461	0.0018721	0.0082197	0.173103	866	4	0.85461
Rnf40	5	0.99812	0.9981	1	17887	0	0.63981	0.0018799	0.0082547	0.173499	867	5	0.63981
Obox6	5	0.99811	0.99809	1	17886	0	0.38741	0.0018946	0.0083106	0.174419	868	5	0.38741
Gys1	5	0.99809	0.99808	1	17884	0	0.40489	0.0019092	0.0083671	0.175404	869	5	0.40489
Dut	5	0.98851	0.98856	1	17343	0	1.9096	0.0019193	0.0084096	0.175928	870	4	1.9096
Zfc3h1	5	0.99808	0.99807	1	17883	0	0.84366	0.0019196	0.0084112	0.175928	871	5	0.84366
L2hgdh	5	0.99807	0.99806	1	17881	0	0.56922	0.0019343	0.0084688	0.17653	872	5	0.56922
Ccdc166	5	0.91266	0.91299	1	15278	0	0.53046	0.0019402	0.0084941	0.176657	873	4	0.53046
Kcnk7	5	0.99805	0.99805	1	17880	0	0.5472	0.0019491	0.0085253	0.177106	874	5	0.5472
Rpl34	4	0.96502	0.96514	1	16531	0	1.1962	0.0019537	0.006954	0.157242	875	3	1.1962
Tceb1	5	0.99537	0.99538	1	17680	0	0.80492	0.0019617	0.0085753	0.177944	876	5	0.80492
Akr1c20	5	0.99803	0.99802	1	17878	0	0.48596	0.0019662	0.0085887	0.178023	877	5	0.48596
Mettl6	5	0.75779	0.79125	1	12799	1	0.80293	0.0019818	0.0086581	0.179258	878	3	0.80293
Rnf126	5	0.99802	0.998	1	17877	0	0.28937	0.001985	0.0086678	0.179258	879	5	0.28937
Ino80c	5	0.9686	0.96877	1	16636	0	0.48402	0.0019905	0.0086942	0.1795	880	4	0.48402
Pes1	5	0.99206	0.99213	1	17507	0	1.3626	0.0019914	0.008699	0.1795	881	4	1.3626
Slc25a3	5	0.9945	0.99451	1	17623	0	0.95276	0.0019968	0.0087243	0.17982	882	5	0.95276
Lsg1	5	0.57148	0.70907	1	11191	1	1.1603	0.0020011	0.008741	0.179962	883	3	1.1603
Uba5	5	0.87787	0.8784	1	14578	1	0.76538	0.0020042	0.008756	0.180071	884	4	0.76538
Gnb1	5	0.97814	0.97829	1	16943	0	1.0732	0.0020141	0.0088012	0.180596	885	4	1.0732
Mff	5	0.64467	0.7371	1	11735	1	0.8284	0.0020196	0.0088211	0.180803	886	4	0.8284
Emc1	5	0.96088	0.96105	1	16424	0	0.75129	0.0020238	0.0088426	0.181043	887	4	0.75129
Rsl24d1	5	0.98248	0.98259	1	17097	0	1.2254	0.0020358	0.0088905	0.181619	888	4	1.2254
Itgad	5	0.97966	0.9798	1	16996	0	0.72688	0.0020388	0.0089029	0.18167	889	4	0.72688
Klra7	5	0.18927	0.35919	1	5832	1	0.74116	0.0020489	0.0089416	0.182258	890	3	0.74116
Vegfb	5	0.99795	0.99792	1	17876	0	0.594	0.0020541	0.0089588	0.182337	891	5	0.594
Esyt2	5	0.73706	0.77996	1	12573	1	0.8518	0.002056	0.0089653	0.182337	892	3	0.8518
Padi3	5	0.99793	0.99791	1	17875	0	0.38036	0.00207	0.0090234	0.183316	893	5	0.38036
Zc3hc1	5	0.98687	0.98692	1	17272	0	0.77698	0.0020751	0.0090433	0.183518	894	4	0.77698
Arl8b	5	0.99792	0.9979	1	17874	0	0.63518	0.0020781	0.0090567	0.183588	895	5	0.63518
Slc22a12	5	0.92296	0.92329	1	15480	0	0.51043	0.0020944	0.009131	0.184889	896	4	0.51043
Slc35a5	5	0.9979	0.99787	1	17872	0	0.48975	0.0021024	0.0091627	0.185328	897	5	0.48975
Ext2	5	0.99577	0.99575	1	17709	0	0.76116	0.0021107	0.0092068	0.186016	898	5	0.76116
Ube2m	8	0.99609	0.99612	1	17737	0	0.48997	0.0021199	0.01164	0.214897	899	7	0.48997
Maz	5	0.98545	0.98556	1	17209	0	0.51508	0.0021246	0.009267	0.186622	900	4	0.51508
Rfc5	5	0.66719	0.74659	1	11938	1	0.96253	0.0021252	0.0092687	0.186622	901	4	0.96253
Npas1	5	0.44049	0.59496	1	9301	1	0.71001	0.0021286	0.0092837	0.186622	902	4	0.71001
Sec61a1	5	0.99542	0.99542	1	17685	0	0.70817	0.0021292	0.0092875	0.186622	903	5	0.70817
Lamtor2	5	0.97314	0.97322	1	16766	0	1.1034	0.0021354	0.0093176	0.187023	904	3	1.1034
Pigm	5	0.95424	0.95449	1	16245	0	0.93217	0.0021399	0.0093386	0.18724	905	4	0.93217
Tmem131	5	0.9187	0.91901	1	15399	0	0.68229	0.0021738	0.0094715	0.189697	906	3	0.68229
Phf8	5	0.96077	0.96094	1	16422	0	0.71996	0.0022123	0.0096398	0.19265	907	4	0.71996
Suds3	5	0.1771	0.34147	1	5577	1	0.67129	0.0022318	0.0097254	0.194149	908	4	0.67129
Senp8	5	0.9203	0.92064	1	15434	0	0.57668	0.0022443	0.0097835	0.194896	909	4	0.57668
Thap11	5	0.89155	0.89201	1	14856	0	0.6639	0.0022476	0.0097931	0.194896	910	4	0.6639
Tacr1	5	0.99775	0.99773	1	17869	0	0.28749	0.0022487	0.0097985	0.194896	911	5	0.28749
Hdac11	5	0.98735	0.9874	1	17293	0	0.59642	0.0022515	0.0098082	0.194896	912	4	0.59642
4930451C15Rik	5	0.99775	0.99772	1	17868	0	0.44795	0.0022529	0.0098157	0.194896	913	5	0.44795
Uxt	5	0.43799	0.59279	1	9273	2	-0.29013	0.0022615	0.0098523	0.195411	914	2	-0.29013
Usp35	5	0.99772	0.99769	1	17866	0	0.37304	0.0022816	0.0099357	0.196781	915	5	0.37304
Rbm12	5	0.97614	0.97631	1	16864	0	0.81068	0.0022846	0.0099481	0.196781	916	3	0.81068
4430402I18Rik	5	0.99771	0.99769	1	17865	0	0.51942	0.0022853	0.0099534	0.196781	917	5	0.51942
Syt7	5	0.9977	0.99768	1	17864	0	0.45455	0.002298	0.010009	0.197495	918	5	0.45455
Ppp1r14b	5	0.99581	0.99579	1	17713	0	0.43444	0.0022987	0.010012	0.197495	919	5	0.43444
Arpc4	9	0.65312	0.83266	1	11801	1	0.67656	0.0023008	0.013182	0.232626	920	5	0.67656
Psmd3	5	0.96183	0.96204	1	16455	0	0.6753	0.002302	0.010022	0.197495	921	3	0.6753
Klhl38	5	0.87685	0.87741	1	14561	1	0.8445	0.0023141	0.010072	0.198269	922	4	0.8445
Klk1b26	3	0.44187	0.50471	1	9318	1	1.0747	0.0023293	0.0065672	0.150907	923	2	1.0747
Arhgap21	5	0.99766	0.99763	1	17863	0	0.34137	0.0023416	0.010183	0.20017	924	5	0.34137
Trim3	5	0.51152	0.65694	1	10302	2	0.67917	0.0023426	0.01019	0.20017	925	3	0.67917
D8Ertd738e	5	0.63033	0.73125	1	11616	1	0.69338	0.00237	0.010307	0.202002	926	4	0.69338
Trappc5	5	0.79024	0.81063	1	13178	1	1.2423	0.0023701	0.010308	0.202002	927	3	1.2423
Hccs	5	0.80048	0.81716	1	13299	1	1.3102	0.0023719	0.010318	0.202002	928	3	1.3102
Ccdc81	5	0.99762	0.9976	1	17861	0	0.50921	0.0023788	0.010345	0.202124	929	5	0.50921
Htatip2	5	0.99761	0.99758	1	17860	0	0.39466	0.0023917	0.010392	0.202834	930	5	0.39466
Nlrp12	5	0.64235	0.73618	1	11715	1	0.8764	0.0023954	0.010404	0.20286	931	3	0.8764
Pot1a	5	0.9976	0.99758	1	17858	0	0.51087	0.002398	0.010417	0.202897	932	5	0.51087
Fam86	5	0.95152	0.95177	1	16170	0	0.54146	0.002401	0.010432	0.202965	933	4	0.54146
Polr1e	5	0.88581	0.8863	1	14740	0	1.7734	0.0024151	0.010483	0.20355	934	3	1.7734
Dntt	5	0.99758	0.99756	1	17856	0	0.47905	0.002416	0.010484	0.20355	935	5	0.47905
Zfp507	5	0.99758	0.99756	1	17855	0	0.57963	0.0024205	0.010502	0.203579	936	5	0.57963
Snrpa1	5	0.49669	0.64378	1	10085	2	0.67731	0.0024252	0.01052	0.203579	937	3	0.67731
Mrgprg	5	0.99757	0.99755	1	17854	0	0.61414	0.0024259	0.010522	0.203579	938	5	0.61414
Rbm14	5	0.85073	0.854	1	14087	1	0.0116	0.0024288	0.01053	0.203579	939	2	0.0116
Smarcc2	5	0.98508	0.9852	1	17197	0	0.62908	0.0024364	0.010564	0.203976	940	4	0.62908
Fbxw4	5	0.99756	0.99753	1	17853	0	0.47151	0.002439	0.010576	0.203976	941	5	0.47151
Lbx2	5	0.81473	0.82696	1	13491	1	0.67519	0.0024406	0.010583	0.203976	942	4	0.67519
Wdr91	5	0.99755	0.99753	1	17852	0	0.49911	0.0024461	0.010611	0.20403	943	5	0.49911
Arhgap28	5	0.91798	0.91831	1	15384	0	0.5203	0.0024484	0.010619	0.20403	944	4	0.5203
Atp1a1	5	0.82145	0.83163	1	13604	1	1.1375	0.002454	0.010644	0.204292	945	3	1.1375
Echdc1	5	0.080027	0.1922	0.975895	3569	2	0.76721	0.0024564	0.010655	0.204296	946	3	0.76721
Cabp4	5	0.28899	0.46692	1	7374	1	0.5873	0.0024681	0.010704	0.205021	947	4	0.5873
Tctn3	5	0.99753	0.99751	1	17849	0	0.26915	0.0024733	0.010726	0.205037	948	5	0.26915
Lss	5	0.74091	0.78196	1	12609	1	0.76815	0.0024737	0.010728	0.205037	949	4	0.76815
Tmem190	5	0.98848	0.98854	1	17340	0	0.63973	0.0024922	0.010806	0.206324	950	3	0.63973
Vmn2r65	5	0.9975	0.99748	1	17848	0	0.39828	0.0024991	0.010831	0.206582	951	5	0.39828
Hsph1	5	0.50544	0.65159	1	10207	2	0.77105	0.0025096	0.010879	0.207028	952	3	0.77105
Ube2r2	5	0.99749	0.99748	1	17846	0	0.52532	0.0025098	0.010879	0.207028	953	5	0.52532
Calhm2	5	0.99749	0.99747	1	17845	0	0.57008	0.002513	0.010891	0.207028	954	5	0.57008
Usp31	5	0.99709	0.99708	1	17812	0	0.54349	0.0025168	0.01091	0.207028	955	5	0.54349
Drosha	5	0.95438	0.95464	1	16250	0	0.98099	0.0025171	0.01091	0.207028	956	4	0.98099
Arfrp1	5	0.99748	0.99746	1	17844	0	0.86189	0.0025242	0.01094	0.207375	957	5	0.86189
Rnf20	5	0.84709	0.851	1	14018	1	0.87409	0.0025333	0.010974	0.207671	958	4	0.87409
Foxb2	5	0.99747	0.99745	1	17843	0	0.35769	0.002534	0.010978	0.207671	959	5	0.35769
Gtf3a	5	0.99746	0.99745	1	17841	0	0.83948	0.0025408	0.011006	0.207977	960	5	0.83948
Rbbp8	5	0.99745	0.99744	1	17840	0	0.99718	0.0025507	0.011052	0.208637	961	5	0.99718
4930427A07Rik	5	0.31516	0.48863	1	7699	1	0.6316	0.0025535	0.011068	0.208727	962	4	0.6316
Prmt2	5	0.99744	0.99743	1	17839	0	0.36042	0.0025601	0.011094	0.209008	963	5	0.36042
Mrpl35	5	0.64588	0.7376	1	11743	1	1.0535	0.0025655	0.011117	0.209008	964	4	1.0535
Wdr24	5	0.98511	0.98523	1	17199	0	0.93121	0.0025792	0.011183	0.210037	965	4	0.93121
Aen	5	0.99741	0.99741	1	17837	0	0.46203	0.0025921	0.011235	0.210799	966	5	0.46203
Zc3h13	5	0.47867	0.628	1	9845	1	0.92031	0.0025955	0.011247	0.210799	967	4	0.92031
Nans	5	0.9974	0.9974	1	17836	0	0.39186	0.0026017	0.011271	0.211038	968	5	0.39186
Gapdh	2	0.99739	0.99735	1	17835	0	1.5744	0.0026055	0.0051455	0.128666	969	2	1.5744
Atp6v1d	5	0.69815	0.76069	1	12200	1	1.3578	0.0026138	0.011319	0.211555	970	4	1.3578
Clk3	5	0.98478	0.98489	1	17186	0	0.33736	0.0026141	0.011321	0.211555	971	4	0.33736
Smchd1	5	0.99738	0.99738	1	17834	0	0.36186	0.0026184	0.01134	0.211691	972	5	0.36186
Slc18a2	5	0.99737	0.99737	1	17833	0	0.43697	0.00263	0.011389	0.212022	973	5	0.43697
Zcchc2	5	0.97454	0.97466	1	16813	0	0.74922	0.0026324	0.0114	0.212022	974	4	0.74922
Slc26a4	5	0.54167	0.68387	1	10745	1	0.89004	0.0026324	0.0114	0.212022	975	3	0.89004
Cnot7	5	0.99046	0.99051	1	17437	0	0.68083	0.002635	0.011408	0.212022	976	4	0.68083
Carns1	5	0.99736	0.99736	1	17832	0	0.30801	0.0026372	0.011416	0.212022	977	5	0.30801
A230046K03Rik	5	0.95443	0.95469	1	16252	0	0.84292	0.0026597	0.011509	0.21343	978	4	0.84292
Cad	5	0.99734	0.99733	1	17831	0	0.51339	0.002661	0.011514	0.21343	979	5	0.51339
Mrpl46	5	0.87022	0.87102	1	14430	1	1.0329	0.0026666	0.011539	0.213673	980	3	1.0329
Fam178a	5	0.99369	0.9937	1	17584	0	0.82478	0.0026789	0.011598	0.214553	981	4	0.82478
Pacs2	5	0.99731	0.9973	1	17830	0	0.53248	0.0026884	0.011633	0.214897	982	5	0.53248
Ndufs8	5	0.99268	0.99273	1	17532	0	0.68743	0.0027037	0.011695	0.215607	983	4	0.68743
Tcirg1	5	0.99729	0.99729	1	17829	0	0.49332	0.0027056	0.011702	0.215607	984	5	0.49332
Cap1	5	0.99291	0.99294	1	17544	0	1.2639	0.0027135	0.01173	0.215906	985	4	1.2639
Wdr12	4	0.99728	0.99728	1	17828	0	1.1103	0.0027202	0.009614	0.192343	986	4	1.1103
Ankrd11	5	0.98921	0.98928	1	17382	0	1.0312	0.0027247	0.011779	0.216024	987	4	1.0312
Papola	5	0.99727	0.99727	1	17826	0	0.32359	0.0027279	0.01179	0.216024	988	5	0.32359
Btbd9	5	0.49951	0.64628	1	10134	2	0.80848	0.0027286	0.011794	0.216024	989	3	0.80848
Znrd1	5	0.97518	0.97533	1	16831	0	0.63676	0.0027288	0.011795	0.216024	990	4	0.63676
Hif3a	5	0.99726	0.99725	1	17825	0	0.34497	0.0027413	0.011842	0.216656	991	5	0.34497
Akt1	5	0.99726	0.99725	1	17824	0	0.4871	0.0027438	0.011855	0.216686	992	5	0.4871
Ccdc6	5	0.99276	0.99281	1	17539	0	0.76987	0.0027762	0.011986	0.218858	993	4	0.76987
Usf2	5	0.6775	0.75114	1	12021	1	0.71807	0.0027869	0.012028	0.219297	994	4	0.71807
Rcl1	5	0.99721	0.99721	1	17822	0	0.674	0.0027887	0.012034	0.219297	995	5	0.674
Hist1h3f	1	0.9972	0.99724	1	17821	0	2.9974	0.0028001	0.0027512	0.087158	996	1	2.9974
Usp15	5	0.99719	0.99719	1	17820	0	0.61312	0.0028072	0.012112	0.2205	997	5	0.61312
Mef2b	5	0.99717	0.99717	1	17818	0	0.2717	0.0028266	0.012201	0.221687	998	5	0.2717
Ahcy	3	0.9919	0.99203	1	17504	0	1.1807	0.0028399	0.0079421	0.170575	999	3	1.1807
Efna2	5	0.86807	0.86909	1	14389	1	0.80096	0.0028405	0.012258	0.222294	1000	4	0.80096
Pcx	5	0.99715	0.99714	1	17817	0	0.33802	0.0028492	0.012293	0.222699	1001	5	0.33802
Brcc3	5	0.99713	0.99712	1	17815	0	0.61551	0.0028731	0.012398	0.224178	1002	5	0.61551
Mettl18	5	0.98656	0.98663	1	17258	0	0.68247	0.0028732	0.012399	0.224178	1003	4	0.68247
Fancm	5	0.99711	0.9971	1	17814	0	0.68697	0.0028851	0.012441	0.224343	1004	5	0.68697
Med31	5	0.81268	0.8255	1	13461	1	1.2277	0.0028863	0.012445	0.224343	1005	4	1.2277
Taf1c	5	0.99707	0.99707	1	17811	0	0.79538	0.0029253	0.012591	0.226769	1006	5	0.79538
Vezt	4	0.25544	0.39484	1	6965	1	0.82744	0.0029257	0.010327	0.202002	1007	3	0.82744
Pptc7	5	0.51945	0.66396	1	10413	1	0.55465	0.0029394	0.012648	0.227409	1008	4	0.55465
Ano9	5	0.98291	0.983	1	17112	0	0.64973	0.0029401	0.012652	0.227409	1009	4	0.64973
Pak1ip1	5	0.99705	0.99704	1	17809	0	0.74909	0.0029492	0.012686	0.227795	1010	5	0.74909
Arrb1	5	0.99704	0.99704	1	17808	0	0.44281	0.0029567	0.012719	0.227988	1011	5	0.44281
Pmch	5	0.031558	0.094392	0.782145	2194	2	1.0498	0.0029706	0.012773	0.228517	1012	3	1.0498
Bcl7a	5	0.99703	0.99702	1	17807	0	0.71838	0.002971	0.012775	0.228517	1013	5	0.71838
Ptprq	5	0.99701	0.99701	1	17806	0	0.38299	0.0029902	0.01284	0.229456	1014	5	0.38299
Tbc1d5	5	0.67836	0.75154	1	12028	1	1.0973	0.0030012	0.012889	0.229886	1015	3	1.0973
Rps15	3	0.99698	0.99702	1	17804	0	1.3092	0.0030195	0.0084386	0.176102	1016	3	1.3092
Tex40	5	0.93434	0.9346	1	15723	0	0.93467	0.0030195	0.012963	0.230977	1017	4	0.93467
Ino80b	5	0.94095	0.9412	1	15889	0	0.96609	0.0030265	0.012989	0.231223	1018	4	0.96609
Mvd	5	0.99697	0.99696	1	17803	0	0.43114	0.0030326	0.013013	0.231411	1019	5	0.43114
Actr10	5	0.39351	0.55467	1	8701	1	0.75934	0.0030423	0.013063	0.231848	1020	3	0.75934
Sbk1	5	0.86499	0.86627	1	14325	1	0.48514	0.0030452	0.013075	0.231848	1021	4	0.48514
Izumo2	5	0.94075	0.941	1	15884	0	0.79823	0.0030546	0.01311	0.23204	1022	4	0.79823
Igflr1	5	0.99695	0.99693	1	17802	0	0.33017	0.0030549	0.013111	0.23204	1023	5	0.33017
Qars	5	0.99693	0.99692	1	17800	0	0.97949	0.0030696	0.013168	0.232626	1024	5	0.97949
Cblb	5	0.78774	0.80907	1	13141	1	0.56598	0.0030703	0.013173	0.232626	1025	4	0.56598
Polr2i	5	0.99691	0.9969	1	17799	0	0.66205	0.0030948	0.013272	0.233987	1026	5	0.66205
Fbxl15	5	0.9969	0.99689	1	17797	0	0.39664	0.0030991	0.013289	0.234057	1027	5	0.39664
Tescl	5	0.95638	0.95664	1	16306	0	0.53892	0.003111	0.013338	0.234618	1028	4	0.53892
Lamtor3	5	0.99689	0.99688	1	17795	0	0.68848	0.0031135	0.013349	0.234618	1029	5	0.68848
Bpgm	5	0.99688	0.99687	1	17794	0	0.69588	0.0031195	0.013371	0.234618	1030	5	0.69588
Gldc	5	0.97728	0.97743	1	16915	0	0.75521	0.0031196	0.013371	0.234618	1031	4	0.75521
AI837181	5	0.68143	0.75297	1	12052	1	0.5161	0.0031463	0.013479	0.236055	1032	4	0.5161
Siva1	6	0.89709	0.90018	1	14959	1	0.74874	0.0031783	0.014733	0.249469	1033	5	0.74874
Arid5b	5	0.99679	0.99677	1	17786	0	0.71278	0.0032147	0.013758	0.240715	1034	5	0.71278
Tmem180	5	0.99678	0.99677	1	17785	0	0.50379	0.0032192	0.013781	0.240885	1035	5	0.50379
Ipo11	5	0.67551	0.75029	1	12007	1	0.70347	0.0032229	0.013799	0.240885	1036	4	0.70347
Polr2e	5	0.99678	0.99677	1	17784	0	0.79773	0.0032249	0.013807	0.240885	1037	5	0.79773
Tbp	5	0.99677	0.99676	1	17783	0	0.8833	0.00323	0.013832	0.24101	1038	5	0.8833
2610318N02Rik	5	0.99677	0.99675	1	17782	0	0.31727	0.0032328	0.01384	0.24101	1039	5	0.31727
Pvrl2	5	0.99675	0.99674	1	17781	0	0.50541	0.0032488	0.013902	0.241849	1040	5	0.50541
Uqcrq	5	0.99671	0.9967	1	17779	0	0.45946	0.0032884	0.014058	0.2435	1041	5	0.45946
Nol10	5	0.99368	0.99369	1	17583	0	1.2142	0.0032896	0.014063	0.2435	1042	4	1.2142
Samd3	5	0.99671	0.99669	1	17778	0	0.36541	0.003291	0.014069	0.2435	1043	5	0.36541
Fank1	5	0.75838	0.79159	1	12810	1	0.52699	0.0032932	0.014073	0.2435	1044	4	0.52699
BC051019	5	0.95415	0.9544	1	16242	0	0.54804	0.003294	0.014076	0.2435	1045	4	0.54804
Cox6b1	5	0.92168	0.92201	1	15460	0	0.52187	0.0032991	0.014098	0.243571	1046	4	0.52187
Zc3hav1	5	0.87307	0.87379	1	14490	1	0.73836	0.0033055	0.014125	0.243571	1047	4	0.73836
Hgs	5	0.48613	0.63455	1	9948	1	0.32324	0.0033072	0.014133	0.243571	1048	4	0.32324
Atp5b	5	0.98071	0.98086	1	17035	0	0.58128	0.0033162	0.014176	0.244075	1049	4	0.58128
Il16	5	0.51411	0.65921	1	10339	1	0.66267	0.0033234	0.014203	0.244312	1050	3	0.66267
Sfxn2	5	0.98353	0.98364	1	17136	0	0.51943	0.0033274	0.014216	0.244312	1051	4	0.51943
Cyp26c1	5	0.99666	0.99664	1	17776	0	0.57302	0.0033359	0.014247	0.244401	1052	5	0.57302
Scfd1	5	0.99666	0.99664	1	17775	0	0.84045	0.0033368	0.014248	0.244401	1053	5	0.84045
Proz	4	0.99666	0.9967	1	17774	0	0.45339	0.0033392	0.011759	0.216024	1054	4	0.45339
Bcl2l14	5	0.99665	0.99663	1	17772	0	0.35887	0.0033529	0.014308	0.245215	1055	5	0.35887
Mob1a	5	0.99664	0.99662	1	17771	0	0.34899	0.0033593	0.014338	0.245485	1056	5	0.34899
Osbpl5	5	0.96574	0.96592	1	16554	0	0.56889	0.0033662	0.014358	0.245615	1057	4	0.56889
Rnmt	5	0.44967	0.60288	1	9435	1	0.76936	0.0033741	0.01439	0.245921	1058	4	0.76936
Nudt22	5	0.99661	0.99659	1	17770	0	0.32464	0.0033935	0.014464	0.24696	1059	5	0.32464
Zfp382	5	0.92232	0.92264	1	15472	0	0.77776	0.0034063	0.014513	0.247566	1060	4	0.77776
Tsn	5	0.93511	0.93538	1	15742	0	0.76277	0.003437	0.014627	0.24903	1061	4	0.76277
Sertad2	5	0.95495	0.95521	1	16266	0	0.6939	0.0034401	0.014639	0.24903	1062	4	0.6939
Supv3l1	5	0.99655	0.99652	1	17769	0	0.71175	0.0034519	0.014688	0.249411	1063	5	0.71175
Sprn	5	0.99655	0.99652	1	17768	0	0.31412	0.0034525	0.014689	0.249411	1064	5	0.31412
Tmem259	5	0.98096	0.98111	1	17044	0	0.71585	0.0034602	0.014723	0.249469	1065	4	0.71585
Pygm	5	0.99599	0.99597	1	17728	0	0.71585	0.0034602	0.014723	0.249469	1066	5	0.71585
Xpo1	4	0.9938	0.99382	1	17593	0	1.3022	0.0034824	0.012244	0.22225	1067	4	1.3022
Uvssa	5	0.31809	0.49106	1	7730	1	0.4921	0.003491	0.014849	0.251206	1068	4	0.4921
Phf2	5	0.93683	0.93711	1	15787	0	0.46558	0.0035034	0.014894	0.251699	1069	4	0.46558
C2cd3	5	0.99649	0.99647	1	17762	0	0.52752	0.0035062	0.014906	0.251699	1070	5	0.52752
Elk3	5	0.99649	0.99646	1	17761	0	0.48511	0.0035122	0.014931	0.251894	1071	5	0.48511
Rph3al	5	0.99648	0.99645	1	17760	0	0.34655	0.0035214	0.014974	0.252398	1072	5	0.34655
Haus1	5	0.94793	0.94819	1	16073	0	0.63571	0.0035321	0.015021	0.252955	1073	4	0.63571
Copb1	5	0.97591	0.97608	1	16849	0	1.1345	0.0035676	0.015148	0.254851	1074	4	1.1345
Mrpl55	5	0.99643	0.9964	1	17759	0	0.40321	0.0035737	0.015176	0.255097	1075	5	0.40321
Cbx5	5	0.99642	0.99639	1	17758	0	0.4705	0.0035784	0.015194	0.255163	1076	5	0.4705
Faf2	5	0.43648	0.59146	1	9251	1	1.0259	0.0035848	0.015229	0.255255	1077	4	1.0259
Vwce	5	0.81706	0.82857	1	13531	1	0.44236	0.0035849	0.015229	0.255255	1078	4	0.44236
Traf2	5	0.99237	0.99244	1	17517	0	0.73832	0.003588	0.015242	0.255255	1079	4	0.73832
Raver1	5	0.99641	0.99638	1	17757	0	0.34744	0.0035938	0.015264	0.255255	1080	5	0.34744
Atg4c	5	0.94046	0.94069	1	15878	0	0.52063	0.0035971	0.015276	0.255255	1081	4	0.52063
Sars2	5	0.86471	0.86601	1	14316	1	0.76326	0.0035999	0.015289	0.255255	1082	4	0.76326
Kitl	5	0.99639	0.99636	1	17756	0	0.6452	0.0036065	0.015311	0.255255	1083	5	0.6452
Dnm1l	5	0.99639	0.99636	1	17755	0	0.7155	0.0036103	0.015327	0.255255	1084	5	0.7155
Cluap1	5	0.99639	0.99636	1	17754	0	0.50188	0.0036112	0.015328	0.255255	1085	5	0.50188
Mtch2	5	0.98752	0.98757	1	17302	0	0.9097	0.003614	0.015338	0.255255	1086	4	0.9097
Rpl37	2	0.99637	0.99635	1	17752	0	2.025	0.003632	0.0071003	0.159961	1087	2	2.025
Ptprh	5	0.98142	0.98157	1	17058	0	0.63222	0.0036481	0.015469	0.257198	1088	4	0.63222
Ing3	5	0.97814	0.97829	1	16942	0	0.67635	0.003658	0.015506	0.257591	1089	4	0.67635
Usp17la	4	0.98723	0.98722	1	17285	0	0.7449	0.0036644	0.012853	0.229456	1090	4	0.7449
Aldh3b1	5	0.95058	0.95082	1	16140	0	0.57616	0.0036716	0.015569	0.258394	1091	4	0.57616
Zfp866	5	0.99632	0.99629	1	17750	0	0.45928	0.0036842	0.015615	0.258929	1092	5	0.45928
Snrnp200	5	0.78514	0.80748	1	13111	1	0.80402	0.0037047	0.015692	0.259861	1093	4	0.80402
Gsg1l	5	0.99629	0.99626	1	17749	0	0.24747	0.0037063	0.0157	0.259861	1094	5	0.24747
Cltc	5	0.97772	0.97786	1	16928	0	0.88336	0.0037136	0.015735	0.260215	1095	4	0.88336
Ethe1	5	0.99571	0.99569	1	17703	0	0.69037	0.003734	0.015817	0.261341	1096	5	0.69037
Taar7a	2	0.99626	0.99622	1	17747	0	0.89001	0.0037419	0.0073128	0.163037	1097	2	0.89001
Gnat3	5	0.9537	0.95395	1	16227	0	1.0301	0.0037501	0.015869	0.261795	1098	4	1.0301
Nek5	5	0.26436	0.44661	1	7070	1	0.48051	0.0037514	0.015873	0.261795	1099	4	0.48051
Eif4enif1	5	0.99578	0.99576	1	17710	0	0.684	0.0037594	0.015903	0.262057	1100	5	0.684
Bloc1s3	5	0.98352	0.98363	1	17135	0	0.43545	0.0037749	0.015961	0.26277	1101	4	0.43545
Tmem39a	5	0.99622	0.99619	1	17746	0	0.4209	0.0037802	0.015986	0.262951	1102	5	0.4209
Comtd1	5	0.99621	0.99619	1	17745	0	0.37335	0.003787	0.016015	0.263136	1103	5	0.37335
Ssc5d	5	0.40536	0.5649	1	8840	2	0.7014	0.0038019	0.016083	0.263837	1104	3	0.7014
Nf2	5	0.99618	0.99616	1	17742	0	0.59214	0.0038164	0.016133	0.264422	1105	5	0.59214
Tsen34	5	0.99616	0.99614	1	17740	0	0.51066	0.0038379	0.01622	0.265613	1106	5	0.51066
Alg2	5	0.82589	0.8348	1	13682	1	0.11802	0.0038393	0.016235	0.265615	1107	2	0.11802
Kdm5a	5	0.99615	0.99613	1	17739	0	0.38398	0.0038471	0.016265	0.26588	1108	5	0.38398
Vps35	5	0.99496	0.99495	1	17650	0	0.62596	0.0038561	0.0163	0.266155	1109	5	0.62596
Sephs1	5	0.82493	0.83408	1	13666	1	0.71126	0.0038589	0.016311	0.266155	1110	4	0.71126
Cd36	5	0.98749	0.98754	1	17300	0	0.73519	0.0038661	0.016339	0.266315	1111	4	0.73519
1810043G02Rik	5	0.96962	0.96972	1	16658	0	0.32365	0.0038688	0.01635	0.266315	1112	4	0.32365
Usp14	5	0.96075	0.96093	1	16421	0	0.99987	0.0038786	0.016391	0.266745	1113	4	0.99987
Mat2a	5	0.99609	0.99608	1	17736	0	0.93949	0.0039069	0.016518	0.268573	1114	5	0.93949
Ier3ip1	5	0.96485	0.96506	1	16527	0	0.69387	0.0039193	0.016563	0.269079	1115	3	0.69387
Vldlr	5	0.99606	0.99603	1	17734	0	0.5476	0.0039428	0.016648	0.270059	1116	5	0.5476
Psmd13	5	0.97364	0.97373	1	16783	0	0.6811	0.0039468	0.016661	0.270059	1117	4	0.6811
Wisp3	5	0.99605	0.99603	1	17733	0	0.34919	0.0039488	0.016668	0.270059	1118	5	0.34919
Zzef1	5	0.84483	0.84919	1	13987	1	0.52228	0.0039668	0.016741	0.271015	1119	4	0.52228
Rrp7a	5	0.996	0.99598	1	17731	0	0.39881	0.0040025	0.016886	0.272576	1120	5	0.39881
Tubgcp5	5	0.98346	0.98356	1	17132	0	1.0141	0.0040069	0.016904	0.272576	1121	4	1.0141
Trps1	5	0.94795	0.94822	1	16074	0	0.77332	0.0040086	0.016912	0.272576	1122	4	0.77332
1500009L16Rik	3	0.99599	0.99607	1	17729	0	2.033	0.0040087	0.011109	0.209008	1123	3	2.033
Efemp2	5	0.99597	0.99596	1	17727	0	0.43044	0.0040323	0.017008	0.273353	1124	5	0.43044
Pank1	5	0.99596	0.99595	1	17726	0	0.51079	0.0040357	0.01702	0.273353	1125	5	0.51079
Mrps12	5	0.95351	0.95375	1	16219	0	0.74705	0.0040484	0.017071	0.273935	1126	4	0.74705
Ccdc93	5	0.86168	0.86328	1	14262	1	0.66233	0.0040575	0.017108	0.274291	1127	3	0.66233
Calm1	5	0.99594	0.99593	1	17725	0	0.38779	0.0040619	0.01713	0.274374	1128	5	0.38779
Wac	5	0.99593	0.99593	1	17723	0	0.92547	0.004066	0.017143	0.274374	1129	5	0.92547
Atp13a1	5	0.99593	0.99592	1	17722	0	0.52318	0.0040715	0.017164	0.274471	1130	5	0.52318
Gm9897	5	0.99592	0.99592	1	17721	0	0.4001	0.00408	0.017197	0.274765	1131	5	0.4001
Kng2	5	0.84924	0.85274	1	14062	1	0.54754	0.0040987	0.017268	0.275619	1132	4	0.54754
Grtp1	5	0.9959	0.99589	1	17720	0	0.51792	0.0041031	0.01728	0.275619	1133	5	0.51792
Rpl17	2	0.99589	0.99587	1	17719	0	1.847	0.0041066	0.0080185	0.171156	1134	2	1.847
Rmnd5a	5	0.99588	0.99587	1	17717	0	0.64984	0.0041248	0.017375	0.276881	1135	5	0.64984
Arap2	5	0.56202	0.7023	1	11068	1	0.63314	0.0041308	0.017398	0.277009	1136	3	0.63314
Rrp1	5	0.96974	0.96984	1	16664	0	0.61422	0.0041653	0.017545	0.278788	1137	3	0.61422
Plk4	5	0.98028	0.98042	1	17023	0	0.71895	0.0041697	0.017566	0.278788	1138	4	0.71895
Gnai2	5	0.99583	0.99582	1	17716	0	0.29501	0.0041699	0.017568	0.278788	1139	5	0.29501
Catsper1	5	0.71865	0.77063	1	12392	1	0.86932	0.004173	0.01758	0.278788	1140	4	0.86932
Sirt1	5	0.97844	0.97857	1	16956	0	0.7221	0.0041741	0.017585	0.278788	1141	4	0.7221
Nxpe3	4	0.99582	0.99581	1	17715	0	0.47089	0.0041771	0.014561	0.248153	1142	4	0.47089
Ppp1r3b	5	0.99582	0.9958	1	17714	0	0.51307	0.0041839	0.017621	0.279115	1143	5	0.51307
4921524J17Rik	5	0.94027	0.94051	1	15870	0	0.82149	0.0041928	0.017667	0.27944	1144	4	0.82149
Dnajb12	5	0.98567	0.98577	1	17220	0	0.75559	0.0041946	0.017673	0.27944	1145	4	0.75559
Ppp1r12b	5	0.9958	0.99578	1	17712	0	0.31772	0.0041986	0.01769	0.27944	1146	5	0.31772
Sdhb	5	0.94916	0.94943	1	16103	0	0.88086	0.0042015	0.017702	0.27944	1147	3	0.88086
Coro1b	5	0.99579	0.99577	1	17711	0	0.63539	0.0042059	0.017721	0.279497	1148	5	0.63539
Tubgcp3	5	0.95192	0.95214	1	16178	0	0.56817	0.0042144	0.017755	0.279553	1149	4	0.56817
Mcat	5	0.99046	0.99051	1	17438	0	0.71873	0.0042236	0.017794	0.279923	1150	4	0.71873
Gm15292	2	0.99576	0.99573	1	17707	0	0.89241	0.0042402	0.0082574	0.173499	1151	2	0.89241
Timm50	5	0.93779	0.93803	1	15806	0	0.73831	0.004242	0.017866	0.280586	1152	4	0.73831
Oat	5	0.99572	0.99571	1	17706	0	0.37042	0.0042752	0.018	0.281947	1153	5	0.37042
Blnk	5	0.65996	0.7435	1	11865	1	0.44348	0.0042842	0.018035	0.281947	1154	4	0.44348
Mogat1	5	0.99333	0.99335	1	17568	0	0.58403	0.0042847	0.018037	0.281947	1155	4	0.58403
Eps15	5	0.99571	0.9957	1	17705	0	0.3348	0.0042862	0.018042	0.281947	1156	5	0.3348
Atp2a1	5	0.99571	0.9957	1	17704	0	0.31441	0.004287	0.018045	0.281947	1157	5	0.31441
Ppp1r11	5	0.90028	0.90066	1	15018	0	0.31702	0.0043198	0.018163	0.282957	1158	3	0.31702
Usp22	5	0.99568	0.99566	1	17701	0	0.39332	0.0043227	0.018173	0.282957	1159	5	0.39332
Zfp420	5	0.99567	0.99566	1	17699	0	0.32227	0.004327	0.018186	0.282957	1160	5	0.32227
Wdr70	5	0.99566	0.99565	1	17697	0	0.60511	0.0043353	0.018221	0.283261	1161	5	0.60511
Rpl28	2	0.99565	0.99562	1	17696	0	1.1687	0.0043516	0.0084852	0.176657	1162	2	1.1687
Hist1h2ac	1	0.99565	0.99572	1	17695	0	3.708	0.0043538	0.0042751	0.116575	1163	1	3.708
Cmss1	5	0.1921	0.36325	1	5895	1	0.73264	0.0044042	0.0185	0.28735	1164	4	0.73264
Zmiz1	5	0.99249	0.99256	1	17525	0	0.52771	0.0044137	0.018534	0.287634	1165	4	0.52771
Tes	5	0.98868	0.98874	1	17350	0	0.5382	0.0044317	0.018596	0.288283	1166	4	0.5382
Scgb1c1	5	0.99556	0.99556	1	17694	0	0.7052	0.0044355	0.018607	0.288283	1167	5	0.7052
Acss3	5	0.99556	0.99556	1	17693	0	0.3999	0.0044424	0.018642	0.28859	1168	5	0.3999
Sept2	5	0.98909	0.98917	1	17372	0	0.86121	0.0044593	0.018711	0.289413	1169	4	0.86121
Gsr	5	0.99553	0.99553	1	17689	0	0.49875	0.0044741	0.018779	0.290209	1170	5	0.49875
Slc30a1	5	0.70891	0.76584	1	12303	1	0.40405	0.0044784	0.0188	0.290262	1171	4	0.40405
Fbxo4	5	0.95194	0.95217	1	16180	0	0.51313	0.0044821	0.018814	0.290262	1172	4	0.51313
Sptbn1	5	0.99551	0.9955	1	17688	0	0.57969	0.004494	0.018866	0.290604	1173	5	0.57969
Rab43	5	0.35448	0.5215	1	8203	1	0.58635	0.0044944	0.018867	0.290604	1174	4	0.58635
Ubald2	5	0.97837	0.9785	1	16952	0	0.55518	0.0045046	0.018907	0.290753	1175	4	0.55518
Ech1	5	0.99549	0.99549	1	17687	0	0.34542	0.0045089	0.018919	0.290753	1176	5	0.34542
Papd7	5	0.78101	0.80491	1	13055	1	0.52948	0.0045099	0.018924	0.290753	1177	4	0.52948
Selp	5	0.95071	0.95096	1	16144	0	0.41702	0.0045148	0.018946	0.290849	1178	4	0.41702
Ercc6l	5	0.95826	0.95847	1	16355	0	0.85081	0.0045281	0.018996	0.291374	1179	3	0.85081
Hebp2	5	0.97817	0.97832	1	16945	0	0.56816	0.004533	0.019014	0.291403	1180	4	0.56816
Cog8	5	0.92385	0.9242	1	15491	0	0.10291	0.0045467	0.019074	0.292083	1181	2	0.10291
Vmn1r56	3	0.99541	0.99554	1	17684	0	0.75998	0.0045903	0.012721	0.227988	1182	3	0.75998
Mnat1	5	0.99541	0.99541	1	17683	0	0.42127	0.0045919	0.019257	0.294411	1183	5	0.42127
Pvr	5	0.99539	0.99539	1	17682	0	0.31808	0.0046119	0.019335	0.295129	1184	5	0.31808
Alg12	5	0.99519	0.99517	1	17668	0	1.0115	0.0046121	0.019337	0.295129	1185	5	1.0115
Specc1l	5	0.99538	0.99538	1	17681	0	0.57997	0.0046183	0.019366	0.295319	1186	5	0.57997
U2af1l4	5	0.99537	0.99537	1	17679	0	0.34877	0.0046315	0.019415	0.295715	1187	5	0.34877
Orc5	5	0.98561	0.98571	1	17216	0	0.74731	0.0046333	0.019424	0.295715	1188	4	0.74731
Vash1	5	0.99533	0.99533	1	17677	0	0.49349	0.004673	0.019594	0.298057	1189	5	0.49349
B3galt5	5	0.99531	0.99531	1	17676	0	0.36034	0.0046868	0.019655	0.298405	1190	5	0.36034
Slc30a9	5	0.99531	0.99531	1	17675	0	0.3256	0.0046895	0.019666	0.298405	1191	5	0.3256
Mrpl21	5	0.99529	0.99529	1	17674	0	0.47292	0.0047052	0.019726	0.299081	1192	5	0.47292
Rcor1	5	0.99189	0.99196	1	17502	0	0.61137	0.0047181	0.019784	0.299707	1193	4	0.61137
Rpl35	2	0.99527	0.99523	1	17673	0	1.0885	0.0047312	0.0092192	0.186062	1194	2	1.0885
Orai3	5	0.99526	0.99524	1	17672	0	0.55278	0.0047422	0.019869	0.300747	1195	5	0.55278
Rbm8a	5	0.52664	0.67038	1	10519	1	0.66352	0.0047641	0.01995	0.30172	1196	3	0.66352
Cops6	5	0.99522	0.9952	1	17671	0	0.44965	0.0047778	0.02001	0.302135	1197	5	0.44965
Mkrn3	5	0.99521	0.99519	1	17670	0	0.30509	0.0047934	0.020069	0.302771	1198	5	0.30509
Nob1	5	0.81815	0.82931	1	13541	1	0.75658	0.0048038	0.020119	0.302919	1199	3	0.75658
Ppp1r15a	5	0.98967	0.98976	1	17406	0	0.53608	0.0048067	0.020128	0.302919	1200	4	0.53608
Cd164	5	0.99515	0.99513	1	17667	0	0.42153	0.0048522	0.020314	0.305479	1201	5	0.42153
Rps11	4	0.55197	0.63488	1	10908	1	1.2686	0.004854	0.016835	0.272051	1202	3	1.2686
Hmga1	3	0.99513	0.99526	1	17666	0	0.5407	0.0048666	0.013448	0.235728	1203	3	0.5407
Cyp2t4	5	0.99513	0.99511	1	17665	0	0.40333	0.0048695	0.020387	0.30632	1204	5	0.40333
Lrrc63	5	0.99512	0.9951	1	17664	0	0.30327	0.0048825	0.02044	0.306612	1205	5	0.30327
Kras	5	0.99512	0.9951	1	17663	0	0.70762	0.0048825	0.02044	0.306612	1206	5	0.70762
Coro1a	5	0.98932	0.9894	1	17387	0	0.42287	0.0048943	0.020488	0.30687	1207	4	0.42287
Sbf2	5	0.99511	0.99509	1	17662	0	0.30959	0.0048948	0.02049	0.30687	1208	5	0.30959
Fam21	5	0.9951	0.99508	1	17661	0	0.43871	0.0049016	0.020514	0.306983	1209	5	0.43871
Psmb6	4	0.68418	0.71105	1	12073	1	1.512	0.0049031	0.016998	0.273353	1210	3	1.512
Pla2g1b	5	0.50332	0.64972	1	10179	2	-0.009646	0.0049121	0.020553	0.307305	1211	2	-0.009646
Svs1	5	0.76208	0.79373	1	12846	1	0.56649	0.0049234	0.020596	0.307665	1212	4	0.56649
Pdlim1	5	0.946	0.94625	1	16025	0	0.55611	0.0049268	0.02061	0.307665	1213	4	0.55611
Macrod1	5	0.99506	0.99505	1	17660	0	0.3104	0.0049394	0.020655	0.308082	1214	5	0.3104
Ndufb9	5	0.99302	0.99305	1	17552	0	0.98225	0.0049446	0.020674	0.308121	1215	4	0.98225
Fbxo46	5	0.88064	0.88113	1	14631	1	0.45693	0.0049543	0.02072	0.308511	1216	4	0.45693
Art1	5	0.99504	0.99504	1	17659	0	0.53345	0.004959	0.020734	0.308511	1217	5	0.53345
Fdxr	5	0.52572	0.66958	1	10499	1	0.51568	0.0049785	0.020814	0.309059	1218	4	0.51568
Fam20b	5	0.99502	0.99502	1	17658	0	0.94126	0.0049786	0.020814	0.309059	1219	5	0.94126
Dpm3	5	0.99427	0.99428	1	17609	0	0.44566	0.0049946	0.020867	0.309488	1220	5	0.44566
Zfp324	5	0.99499	0.99499	1	17657	0	0.57557	0.0050076	0.020917	0.309826	1221	5	0.57557
Cend1	5	0.99499	0.99499	1	17656	0	0.31105	0.0050096	0.020923	0.309826	1222	5	0.31105
Acan	5	0.99498	0.99498	1	17654	0	0.47765	0.0050165	0.020954	0.310039	1223	5	0.47765
Efr3b	5	0.57862	0.71159	1	11245	1	0.53739	0.0050222	0.020985	0.310235	1224	4	0.53739
Klk11	5	0.99496	0.99496	1	17651	0	0.26083	0.0050359	0.021039	0.310746	1225	5	0.26083
Ostf1	5	0.98598	0.98606	1	17232	0	0.69744	0.0050396	0.021053	0.310746	1226	4	0.69744
Snrpg	3	0.97915	0.97934	1	16981	0	1.443	0.0050554	0.013947	0.242406	1227	3	1.443
Tspyl1	5	0.99494	0.99494	1	17649	0	0.45534	0.0050571	0.021116	0.311425	1228	5	0.45534
Ppp2r5b	5	0.96721	0.96739	1	16589	0	0.42884	0.0050759	0.021199	0.312154	1229	4	0.42884
Ugt2b1	5	0.97892	0.97905	1	16974	0	0.54807	0.0050841	0.021225	0.312277	1230	4	0.54807
Tbc1d31	5	0.9776	0.97775	1	16922	0	0.51414	0.0050969	0.02127	0.312663	1231	4	0.51414
Qpctl	5	0.99174	0.9918	1	17491	0	0.49646	0.0051016	0.021285	0.312663	1232	4	0.49646
Klc3	5	0.99489	0.99489	1	17648	0	0.4938	0.0051098	0.02132	0.312883	1233	5	0.4938
Wdr43	3	0.94892	0.94913	1	16100	0	1.1965	0.0051117	0.014114	0.243571	1234	2	1.1965
Wdr62	5	0.99489	0.99489	1	17647	0	0.4535	0.0051134	0.021334	0.312883	1235	5	0.4535
Dhodh	5	0.99488	0.99488	1	17646	0	0.44975	0.0051237	0.021375	0.31311	1236	5	0.44975
Gna14	5	0.87436	0.87503	1	14509	1	0.74785	0.0051257	0.021383	0.31311	1237	3	0.74785
Neurl1a	4	0.99487	0.99487	1	17645	0	0.3135	0.0051335	0.01775	0.279553	1238	4	0.3135
Stk25	5	0.99482	0.99483	1	17644	0	0.73434	0.0051819	0.021597	0.315484	1239	5	0.73434
Scnn1g	5	0.98427	0.98437	1	17168	0	0.57398	0.0051988	0.021659	0.315832	1240	3	0.57398
Prrt4	5	0.9948	0.9948	1	17643	0	0.31179	0.0052019	0.02167	0.315832	1241	5	0.31179
Col17a1	5	0.52734	0.67102	1	10536	2	0.64887	0.0052027	0.021672	0.315832	1242	3	0.64887
Haus5	4	0.99479	0.9948	1	17642	0	0.95571	0.0052085	0.018003	0.281947	1243	4	0.95571
Afap1l1	5	0.99479	0.99479	1	17641	0	0.26547	0.0052144	0.021719	0.316162	1244	5	0.26547
Oser1	5	0.69935	0.76123	1	12212	1	0.56104	0.0052169	0.021729	0.316162	1245	4	0.56104
Slc4a7	5	0.99477	0.99476	1	17639	0	0.33816	0.0052332	0.021793	0.316843	1246	5	0.33816
Nudt16l1	5	0.95621	0.95646	1	16299	0	0.4287	0.0052509	0.021855	0.317218	1247	4	0.4287
Ctnna1	5	0.99474	0.99474	1	17638	0	0.31037	0.0052579	0.021883	0.317218	1248	5	0.31037
Mettl16	5	0.99474	0.99474	1	17637	0	0.9955	0.0052587	0.021888	0.317218	1249	5	0.9955
Vmn1r43	4	0.99474	0.99476	1	17636	0	0.65004	0.0052598	0.018178	0.282957	1250	4	0.65004
1810055G02Rik	5	0.63428	0.73287	1	11647	1	0.44238	0.0052685	0.021931	0.317591	1251	3	0.44238
Sigirr	5	0.78279	0.80605	1	13081	1	0.71218	0.0052825	0.021979	0.318042	1252	3	0.71218
Snx6	5	0.096325	0.21834	1	3904	2	0.30298	0.0053074	0.022072	0.319138	1253	3	0.30298
Cib1	5	0.99469	0.99468	1	17635	0	0.41565	0.0053148	0.022103	0.31933	1254	5	0.41565
Pkp3	5	0.95324	0.95348	1	16210	0	0.6262	0.0053227	0.02214	0.319616	1255	4	0.6262
Grlf1	5	0.91302	0.91336	1	15286	0	0.4717	0.0053424	0.02223	0.320669	1256	4	0.4717
Yif1b	5	0.99464	0.99465	1	17634	0	0.48742	0.0053551	0.022283	0.321177	1257	5	0.48742
Dlg2	5	0.99463	0.99463	1	17633	0	0.30276	0.0053722	0.022348	0.321856	1258	5	0.30276
Ccdc71l	5	0.99461	0.99461	1	17632	0	0.37942	0.0053884	0.022411	0.322518	1259	5	0.37942
Tbl3	5	0.84293	0.84771	1	13948	1	0.20711	0.0054258	0.022556	0.324346	1260	3	0.20711
Sbspon	5	0.99456	0.99457	1	17630	0	0.38178	0.0054383	0.022603	0.324483	1261	5	0.38178
Tubd1	5	0.97224	0.97235	1	16742	0	0.69402	0.0054425	0.022618	0.324483	1262	4	0.69402
Ak2	5	0.99456	0.99457	1	17629	0	1.0073	0.0054426	0.022618	0.324483	1263	5	1.0073
Vwa2	5	0.99453	0.99455	1	17628	0	0.3121	0.0054651	0.022694	0.325043	1264	5	0.3121
Pigh	5	0.94202	0.94226	1	15919	0	0.69295	0.0054671	0.022701	0.325043	1265	4	0.69295
Tubg1	5	0.99453	0.99454	1	17627	0	0.39786	0.0054685	0.02271	0.325043	1266	5	0.39786
Kat5	5	0.88762	0.88811	1	14775	0	0.65515	0.0054751	0.022735	0.325144	1267	4	0.65515
Oxct1	5	0.66915	0.74742	1	11957	1	0.7847	0.0054869	0.022782	0.325408	1268	4	0.7847
Atp6v1f	5	0.99451	0.99453	1	17626	0	0.7964	0.0054876	0.022789	0.325408	1269	5	0.7964
Rhobtb1	5	0.99451	0.99452	1	17625	0	0.35285	0.005492	0.022808	0.325424	1270	5	0.35285
Polr2b	5	0.9945	0.99451	1	17622	0	0.80934	0.0055046	0.022858	0.325885	1271	5	0.80934
Gpr137	5	0.8956	0.89608	1	14931	0	0.60497	0.00551	0.022879	0.325894	1272	3	0.60497
Gpr26	5	0.99448	0.9945	1	17620	0	0.18942	0.0055163	0.022894	0.325894	1273	5	0.18942
Rbp4	5	0.98759	0.98765	1	17305	0	0.49509	0.0055253	0.022925	0.326094	1274	4	0.49509
Jkamp	5	0.5544	0.69541	1	10947	1	0.49489	0.0055302	0.022949	0.326178	1275	4	0.49489
Apoc2	5	0.95074	0.951	1	16145	0	0.71443	0.0055495	0.023033	0.327118	1276	4	0.71443
Zdhhc24	5	0.99431	0.99432	1	17613	0	0.6084	0.0055595	0.023072	0.327354	1277	5	0.6084
Ireb2	5	0.99097	0.99103	1	17455	0	0.67851	0.005562	0.023085	0.327354	1278	4	0.67851
Zfp511	5	0.9921	0.99216	1	17509	0	0.47319	0.0055826	0.023158	0.328135	1279	4	0.47319
Zfp781	4	0.26498	0.4049	1	7075	1	0.7706	0.005594	0.019258	0.294411	1280	3	0.7706
Vmn2r19	5	0.99439	0.9944	1	17619	0	0.51106	0.0056112	0.023276	0.329547	1281	5	0.51106
Adam10	5	0.99438	0.99439	1	17618	0	0.31132	0.00562	0.023314	0.329834	1282	5	0.31132
Cd19	5	0.93453	0.93481	1	15727	0	0.7139	0.0056448	0.023415	0.33101	1283	3	0.7139
Prr14	5	0.99433	0.99434	1	17616	0	0.27619	0.0056734	0.023526	0.332279	1284	5	0.27619
Gnl3l	5	0.99432	0.99434	1	17615	0	1.0288	0.0056769	0.023541	0.332279	1285	5	1.0288
Chtop	5	0.99432	0.99433	1	17614	0	0.86939	0.0056823	0.02356	0.332298	1286	5	0.86939
Opa1	4	0.67388	0.70431	1	11995	1	0.6949	0.0057002	0.019617	0.298162	1287	3	0.6949
Plekhg2	5	0.99179	0.99185	1	17494	0	0.62491	0.0057014	0.023632	0.333059	1288	4	0.62491
Edc3	5	0.91649	0.91679	1	15355	0	0.92602	0.0057161	0.023684	0.333233	1289	3	0.92602
Spice1	5	0.99428	0.99429	1	17612	0	0.44236	0.0057226	0.023707	0.333233	1290	5	0.44236
Aars2	5	0.96757	0.96774	1	16600	0	0.97894	0.0057228	0.023708	0.333233	1291	4	0.97894
Acsm2	5	0.99428	0.99429	1	17611	0	0.35444	0.0057244	0.023717	0.333233	1292	5	0.35444
Thrsp	5	0.99427	0.99428	1	17610	0	0.64352	0.0057298	0.023738	0.333269	1293	5	0.64352
Ddx55	5	0.99059	0.99065	1	17439	0	0.6373	0.0057413	0.023781	0.333626	1294	4	0.6373
Cyp27a1	5	0.99425	0.99426	1	17608	0	0.45692	0.0057496	0.023819	0.3339	1295	5	0.45692
Fosl1	5	0.70464	0.7638	1	12256	1	0.58285	0.0057902	0.023984	0.335952	1296	3	0.58285
Gm608	5	0.85806	0.86011	1	14205	1	0.65869	0.0058135	0.024078	0.33678	1297	3	0.65869
Cops7a	5	0.98898	0.98906	1	17363	0	0.43724	0.0058142	0.024079	0.33678	1298	4	0.43724
Ccl25	4	0.90547	0.90561	1	15135	0	0.73348	0.0058197	0.019994	0.302135	1299	3	0.73348
Sipa1	5	0.99416	0.99418	1	17607	0	0.57393	0.0058367	0.024166	0.337743	1300	5	0.57393
Uqcrfs1	4	0.98964	0.98963	1	17403	0	1.1352	0.0058491	0.020092	0.302872	1301	4	1.1352
Polr3d	5	0.84622	0.85032	1	14007	1	0.72732	0.0058776	0.024333	0.33955	1302	3	0.72732
Laptm4b	5	0.69991	0.76151	1	12217	1	0.10347	0.0058825	0.024352	0.339566	1303	2	0.10347
Slc36a1	5	0.99409	0.9941	1	17606	0	0.22871	0.0059087	0.02445	0.340192	1304	5	0.22871
Ndufa3	5	0.31595	0.48928	1	7709	1	0.52707	0.005909	0.024452	0.340192	1305	4	0.52707
Ruvbl1	5	0.9691	0.96922	1	16648	0	0.38379	0.0059172	0.024485	0.340391	1306	3	0.38379
Nrf1	5	0.99407	0.99408	1	17605	0	0.68824	0.0059285	0.024527	0.340513	1307	5	0.68824
Mapk3	5	0.99407	0.99408	1	17604	0	0.70277	0.0059303	0.024531	0.340513	1308	5	0.70277
Rgs10	5	0.99406	0.99407	1	17603	0	0.22523	0.0059442	0.024588	0.340599	1309	5	0.22523
Apon	5	0.99405	0.99407	1	17602	0	0.2937	0.005947	0.0246	0.340599	1310	5	0.2937
Fam89a	5	0.12349	0.26074	1	4498	1	0.45607	0.0059587	0.024641	0.340599	1311	4	0.45607
1700092M07Rik	5	0.97212	0.97221	1	16739	0	0.42492	0.005962	0.024648	0.340599	1312	4	0.42492
Tmem208	5	0.99403	0.99404	1	17601	0	0.77874	0.0059665	0.024668	0.340619	1313	5	0.77874
Kcnh2	5	0.99403	0.99404	1	17600	0	0.27071	0.0059739	0.024699	0.340794	1314	5	0.27071
Rtp2	5	0.99401	0.99402	1	17599	0	0.23858	0.005986	0.024747	0.341191	1315	5	0.23858
Brox	5	0.994	0.99401	1	17596	0	0.4708	0.0059972	0.024786	0.341469	1316	5	0.4708
Ccl17	5	0.19807	0.37185	1	6024	1	0.70641	0.0060451	0.024939	0.342221	1317	4	0.70641
Psg26	5	0.84243	0.84732	1	13938	1	0.68448	0.0060464	0.024942	0.342221	1318	4	0.68448
Sec22b	5	0.20462	0.38122	1	6162	2	-0.098349	0.0060493	0.02495	0.342221	1319	1	-0.098349
Edc4	5	0.72685	0.77474	1	12477	1	0.53154	0.0060628	0.024985	0.342221	1320	3	0.53154
Fam187b	5	0.93509	0.93536	1	15740	0	0.66057	0.0060639	0.024989	0.342221	1321	4	0.66057
Aldh16a1	5	0.82341	0.833	1	13642	1	0.57682	0.0060837	0.025039	0.342659	1322	4	0.57682
Pla2g6	5	0.99344	0.99346	1	17572	0	0.43604	0.0060956	0.025083	0.343	1323	4	0.43604
Ppp2ca	5	0.57702	0.71102	1	11233	1	0.5248	0.0061303	0.025192	0.34399	1324	4	0.5248
Chst11	5	0.93502	0.9353	1	15737	0	0.48666	0.0061317	0.025193	0.34399	1325	4	0.48666
Ap3b1	5	0.8984	0.89881	1	14982	0	1.1277	0.006143	0.025228	0.344212	1326	4	1.1277
Phldb3	5	0.72885	0.77574	1	12489	1	0.45576	0.0061854	0.025341	0.345176	1327	4	0.45576
Dot1l	5	0.47157	0.62181	1	9739	2	0.075541	0.0061889	0.025353	0.345176	1328	2	0.075541
Htra1	5	0.60745	0.72231	1	11440	1	0.7415	0.0061893	0.025355	0.345176	1329	4	0.7415
Gm15056	5	0.95191	0.95214	1	16177	0	0.76631	0.006196	0.025374	0.345177	1330	3	0.76631
Ern2	5	0.98458	0.9847	1	17179	0	0.38017	0.0062043	0.025401	0.345303	1331	4	0.38017
Sart3	5	0.99065	0.9907	1	17441	0	0.81634	0.0062148	0.025427	0.345391	1332	4	0.81634
Aurkb	4	0.90403	0.90418	1	15104	0	0.6874	0.006245	0.021428	0.313522	1333	2	0.6874
Akap8	5	0.98908	0.98915	1	17368	0	0.26119	0.006263	0.025556	0.346889	1334	3	0.26119
Kctd3	5	0.96778	0.96796	1	16605	0	0.64608	0.00627	0.025575	0.346889	1335	4	0.64608
Clcf1	5	0.80847	0.82256	1	13406	1	0.42303	0.0062918	0.025646	0.347397	1336	4	0.42303
Pcna	5	0.91077	0.91113	1	15245	0	1.1194	0.0062976	0.025665	0.347397	1337	4	1.1194
Tpte	5	0.94351	0.94375	1	15969	0	0.51689	0.0063028	0.025683	0.347397	1338	4	0.51689
Rbm34	5	0.5929	0.71682	1	11336	1	0.69657	0.0063056	0.025688	0.347397	1339	3	0.69657
Rbm20	5	0.96551	0.9657	1	16548	0	0.42845	0.0063267	0.025752	0.348007	1340	4	0.42845
Aco2	5	0.81517	0.82726	1	13498	1	0.93617	0.0063429	0.0258	0.348353	1341	4	0.93617
Tceb2	2	0.99365	0.99366	1	17580	0	1.7045	0.0063456	0.012191	0.221687	1342	2	1.7045
Stard10	5	0.9414	0.94164	1	15902	0	0.78078	0.0063478	0.025815	0.348353	1343	3	0.78078
Dppa3	4	0.98635	0.98636	1	17246	0	0.57885	0.0063822	0.021871	0.317218	1344	4	0.57885
Ccnt1	5	0.96239	0.9626	1	16468	0	0.65991	0.0063996	0.025962	0.349894	1345	4	0.65991
Oxsm	5	0.98647	0.98655	1	17252	0	0.3576	0.0064018	0.025967	0.349894	1346	3	0.3576
Arhgap12	5	0.53274	0.67581	1	10614	1	0.57763	0.0064474	0.026088	0.350687	1347	4	0.57763
Cdca4	5	0.97833	0.97847	1	16951	0	0.41812	0.0064522	0.026102	0.350687	1348	4	0.41812
Qrich1	5	0.9483	0.94858	1	16082	0	0.47176	0.0065178	0.026312	0.352983	1349	4	0.47176
Gm10094	3	0.42089	0.49179	1	9041	1	0.24321	0.0065248	0.01782	0.280098	1350	2	0.24321
Sac3d1	5	0.97732	0.97746	1	16916	0	0.38992	0.0065796	0.026498	0.355228	1351	4	0.38992
Gosr2	5	0.34354	0.51234	1	8059	1	0.55616	0.0066205	0.026613	0.356504	1352	4	0.55616
Vmn1r47	3	0.77204	0.7723	1	12949	0	1.2483	0.0066306	0.018113	0.282766	1353	2	1.2483
Rab19	5	0.93519	0.93546	1	15745	0	0.81955	0.0066378	0.026662	0.356907	1354	3	0.81955
Tufm	5	0.98799	0.98804	1	17317	0	0.59959	0.0066937	0.026824	0.358315	1355	4	0.59959
Rpf2	5	0.97797	0.97812	1	16933	0	0.58639	0.0066946	0.026826	0.358315	1356	4	0.58639
Cacng7	5	0.95608	0.95633	1	16294	0	0.4884	0.0067044	0.026855	0.35845	1357	4	0.4884
Cstf2t	5	0.70472	0.76384	1	12257	1	0.76868	0.0067471	0.026964	0.359639	1358	4	0.76868
Brsk1	5	0.98497	0.98509	1	17190	0	0.39863	0.0067661	0.027017	0.359821	1359	4	0.39863
D19Bwg1357e	5	0.80176	0.81801	1	13312	1	0.60107	0.0067729	0.02704	0.359868	1360	3	0.60107
Tars2	5	0.96833	0.96851	1	16626	0	0.49009	0.006792	0.027105	0.360467	1361	4	0.49009
Atxn7l1	10	0.83882	0.92258	1	13875	1	0.44771	0.0067964	0.035137	0.423187	1362	7	0.44771
2510002D24Rik	5	0.98882	0.98888	1	17354	0	0.60189	0.0068223	0.027186	0.361286	1363	4	0.60189
Sult2b1	5	0.79631	0.81447	1	13256	1	0.57294	0.0068435	0.027246	0.361825	1364	4	0.57294
Pfas	5	0.55233	0.69351	1	10912	1	0.60498	0.0068687	0.027322	0.362571	1365	4	0.60498
Serpinb2	5	0.34022	0.50954	1	8015	1	0.64643	0.0069419	0.027531	0.364809	1366	4	0.64643
Sfxn3	5	0.90508	0.90548	1	15126	0	0.42082	0.006949	0.02755	0.364809	1367	4	0.42082
Hpn	5	0.97675	0.97689	1	16891	0	0.53487	0.0069621	0.027595	0.365137	1368	3	0.53487
1600002H07Rik	5	0.82132	0.83154	1	13601	1	0.15274	0.0069713	0.027617	0.365174	1369	2	0.15274
Lrfn1	5	0.99312	0.99314	1	17557	0	0.388	0.0070004	0.027695	0.365893	1370	4	0.388
Tmem216	5	0.9247	0.92504	1	15513	0	0.86191	0.007027	0.027773	0.366383	1371	4	0.86191
Eaf1	5	0.31202	0.48601	1	7658	1	0.93841	0.0070373	0.027803	0.366383	1372	4	0.93841
Acadsb	5	0.83341	0.84041	1	13793	1	0.63024	0.0070435	0.027821	0.366383	1373	4	0.63024
Zfp541	5	0.93268	0.93296	1	15688	0	0.74383	0.0070459	0.027828	0.366383	1374	4	0.74383
Rad17	5	0.34167	0.51079	1	8033	2	0.68162	0.0070947	0.027969	0.367683	1375	3	0.68162
Fbxo22	5	0.3657	0.53096	1	8330	1	0.65428	0.0070989	0.027979	0.367683	1376	4	0.65428
Zdhhc19	5	0.81527	0.82733	1	13500	1	0.70345	0.0071014	0.027987	0.367683	1377	4	0.70345
Elavl1	5	0.98617	0.98625	1	17240	0	0.54138	0.0071295	0.028064	0.368431	1378	4	0.54138
Morn4	5	0.96474	0.96495	1	16521	0	0.64788	0.0071474	0.028111	0.368789	1379	4	0.64788
Hey2	4	0.74663	0.75545	1	12675	1	0.6854	0.0071754	0.024453	0.340192	1380	3	0.6854
Scd2	5	0.66716	0.74658	1	11937	1	1.4313	0.0071911	0.028224	0.369612	1381	3	1.4313
Mbd1	5	0.87285	0.87359	1	14483	1	0.43753	0.0072052	0.028263	0.369612	1382	4	0.43753
Bst2	5	0.62738	0.73007	1	11593	1	0.58926	0.0072057	0.028264	0.369612	1383	4	0.58926
Mrpl28	5	0.88339	0.88387	1	14689	0	0.74419	0.0072081	0.02827	0.369612	1384	3	0.74419
Gadd45a	5	0.9865	0.98658	1	17253	0	0.39134	0.0072195	0.028297	0.369612	1385	4	0.39134
Srm	5	0.9919	0.99197	1	17503	0	0.61446	0.0072225	0.028308	0.369612	1386	4	0.61446
Snrpd2	4	0.94495	0.94508	1	16001	0	1.1995	0.0072236	0.024596	0.340599	1387	3	1.1995
Snrpf	4	0.83631	0.83636	1	13841	0	1.1691	0.0072292	0.024613	0.340599	1388	3	1.1691
Uba1	5	0.73492	0.77882	1	12548	1	0.46469	0.0072361	0.028345	0.369612	1389	3	0.46469
Sugp2	5	0.28603	0.46448	1	7334	1	0.38926	0.0072368	0.028346	0.369612	1390	4	0.38926
Letm1	5	0.98806	0.98809	1	17318	0	0.79234	0.0072423	0.028362	0.369612	1391	4	0.79234
Pak1	5	0.64757	0.73828	1	11754	1	1.0898	0.0072475	0.028375	0.369612	1392	3	1.0898
Map4k1	5	0.98361	0.98373	1	17141	0	0.41712	0.0072936	0.028504	0.370776	1393	4	0.41712
Gm12695	5	0.44606	0.59977	1	9384	2	0.98156	0.0073061	0.028545	0.371046	1394	3	0.98156
Dpy30	4	0.99269	0.9927	1	17534	0	0.9553	0.0073091	0.024866	0.342069	1395	4	0.9553
Zfyve26	5	0.94013	0.94037	1	15867	0	0.57995	0.00734	0.028637	0.371979	1396	4	0.57995
2010002M12Rik	5	0.91201	0.91236	1	15265	0	0.43583	0.0073835	0.028768	0.373329	1397	4	0.43583
Trpm3	5	0.9917	0.99177	1	17490	0	0.58362	0.0073927	0.028789	0.373329	1398	4	0.58362
Tfrc	5	0.993	0.99304	1	17550	0	0.67788	0.0073973	0.028803	0.373329	1399	4	0.67788
Sptlc2	5	0.22236	0.40617	1	6511	1	0.65398	0.0074496	0.028962	0.374876	1400	3	0.65398
Mrap	5	0.98387	0.98398	1	17152	0	0.37259	0.0074588	0.028989	0.374961	1401	4	0.37259
Ugp2	5	0.98642	0.98651	1	17249	0	0.67374	0.0074695	0.029025	0.37517	1402	4	0.67374
Aimp2	5	0.98107	0.98122	1	17048	0	0.45706	0.007537	0.029219	0.377137	1403	4	0.45706
Atf7ip	5	0.943	0.94324	1	15949	0	0.79312	0.0075371	0.029219	0.377137	1404	3	0.79312
Wdr61	5	0.79078	0.81095	1	13190	1	0.16632	0.0075461	0.029245	0.377142	1405	2	0.16632
Hddc3	5	0.82555	0.83453	1	13677	1	0.45979	0.0075518	0.02926	0.377142	1406	4	0.45979
Ccdc77	5	0.97849	0.97861	1	16959	0	0.72097	0.0076558	0.029554	0.380144	1407	4	0.72097
Leng8	5	0.81968	0.8304	1	13569	1	0.11907	0.0076612	0.029566	0.380144	1408	2	0.11907
Cln8	5	0.50521	0.65141	1	10206	2	0.66366	0.0076656	0.029583	0.380144	1409	3	0.66366
Med22	5	0.95182	0.95205	1	16176	0	0.71379	0.0076758	0.029614	0.380144	1410	4	0.71379
Yars2	5	0.89314	0.89359	1	14890	0	0.13979	0.0076859	0.029644	0.380144	1411	2	0.13979
Erbb2	5	0.97997	0.98011	1	17012	0	0.56041	0.0076917	0.029658	0.380144	1412	4	0.56041
Spidr	4	0.97428	0.97449	1	16805	0	0.75678	0.0076947	0.026034	0.350536	1413	3	0.75678
Nek7	5	0.1884	0.35792	1	5811	1	0.72848	0.0077244	0.029761	0.381195	1414	4	0.72848
Nubpl	5	0.40058	0.56076	1	8783	2	0.75474	0.0077343	0.029795	0.381364	1415	3	0.75474
Kbtbd8	5	0.88041	0.88091	1	14626	1	0.45307	0.0077426	0.02982	0.381422	1416	4	0.45307
Rpn1	5	0.83489	0.84155	1	13818	1	0.99187	0.0077585	0.029862	0.381645	1417	4	0.99187
Wdr52	5	0.92638	0.92669	1	15551	0	0.5973	0.0077672	0.029888	0.381645	1418	4	0.5973
Psmd7	5	0.99179	0.99185	1	17495	0	0.86399	0.0077726	0.0299	0.381645	1419	4	0.86399
Sult2a2	3	0.82231	0.82234	1	13619	0	0.8742	0.007796	0.021164	0.311889	1420	2	0.8742
Bsph1	5	0.80264	0.8186	1	13325	1	0.53646	0.0078001	0.029984	0.382457	1421	3	0.53646
Tmem80	5	0.25765	0.44101	1	6991	2	0.43772	0.0078572	0.030138	0.383766	1422	3	0.43772
Macc1	5	0.83166	0.8391	1	13758	1	0.73253	0.0078623	0.030149	0.383766	1423	3	0.73253
Nat14	5	0.52609	0.66991	1	10508	1	0.56573	0.0079011	0.030273	0.384936	1424	3	0.56573
Col10a1	5	0.95645	0.9567	1	16310	0	0.64661	0.0079101	0.0303	0.384936	1425	3	0.64661
Iglon5	5	0.9839	0.98401	1	17154	0	0.51	0.0079159	0.030323	0.384936	1426	4	0.51
Slc22a19	5	0.58162	0.71267	1	11263	1	0.66373	0.0079334	0.030376	0.384936	1427	3	0.66373
Csnk2a2	5	0.56018	0.70064	1	11031	1	0.68344	0.0079373	0.030387	0.384936	1428	3	0.68344
Mark4	4	0.47014	0.59619	1	9719	1	0.7824	0.0079457	0.026823	0.358315	1429	3	0.7824
Casp8ap2	5	0.985	0.98512	1	17194	0	0.96165	0.0079671	0.030467	0.385679	1430	4	0.96165
Tcof1	5	0.98791	0.98796	1	17314	0	0.46925	0.0079935	0.030539	0.386326	1431	4	0.46925
Rplp2	5	0.94298	0.94321	1	15948	0	0.74886	0.0080348	0.030659	0.387304	1432	3	0.74886
Naca	10	0.99398	0.99406	1	17595	0	0.54527	0.0080477	0.04019	0.460322	1433	7	0.54527
Gipc1	5	0.90167	0.90205	1	15048	0	0.21724	0.0080824	0.030788	0.388668	1434	3	0.21724
Ceacam18	5	0.98165	0.98178	1	17069	0	0.39663	0.0080936	0.03082	0.388809	1435	4	0.39663
Ddx42	5	0.4712	0.62148	1	9734	1	0.66609	0.0081404	0.03097	0.389989	1436	4	0.66609
Klrc1	5	0.83947	0.84499	1	13885	1	0.76086	0.0081436	0.030977	0.389989	1437	3	0.76086
Yae1d1	5	0.53308	0.67613	1	10623	2	1.2655	0.0081752	0.031071	0.390795	1438	3	1.2655
Rad52	5	0.98215	0.98227	1	17086	0	0.55715	0.0081782	0.031084	0.390795	1439	4	0.55715
Lag3	5	0.98757	0.98762	1	17304	0	0.43841	0.0082179	0.031193	0.3919	1440	4	0.43841
Actg2	5	0.98849	0.98854	1	17342	0	0.4628	0.0082709	0.031341	0.393284	1441	4	0.4628
Fgfr1op2	5	0.53544	0.67824	1	10654	1	0.45416	0.0082784	0.031367	0.393284	1442	4	0.45416
Upk1b	5	0.82777	0.83618	1	13710	1	0.87228	0.0082786	0.031367	0.393284	1443	3	0.87228
Ndufa6	5	0.26188	0.44452	1	7038	2	0.00081103	0.0083276	0.031526	0.395012	1444	2	0.00081103
Psmc4	5	0.93293	0.9332	1	15695	0	1.0535	0.0083372	0.031553	0.39508	1445	3	1.0535
Nupr1	5	0.91213	0.91248	1	15267	0	0.56388	0.0084095	0.03176	0.397403	1446	4	0.56388
Rpl7a	2	0.99155	0.99152	1	17481	0	1.2995	0.0084506	0.016026	0.263136	1447	2	1.2995
Tti2	5	0.64645	0.73784	1	11748	1	0.71404	0.0084742	0.03194	0.398961	1448	3	0.71404
9030624J02Rik	5	0.61373	0.72477	1	11486	1	0.844	0.0084782	0.031954	0.398961	1449	4	0.844
Bahd1	5	0.98563	0.98573	1	17217	0	0.56163	0.0084823	0.031968	0.398961	1450	4	0.56163
Cep152	5	0.96554	0.96573	1	16549	0	0.47591	0.0084839	0.031973	0.398961	1451	4	0.47591
Rps24	1	0.99152	0.99153	1	17480	0	3.2567	0.008484	0.0084295	0.176102	1452	1	3.2567
Nsmce4a	5	0.98139	0.98154	1	17056	0	0.84332	0.0084917	0.031993	0.398961	1453	4	0.84332
Tsc22d1	15	0.95667	0.9862	1	16313	1	0.19504	0.0085269	0.048829	0.51181	1454	8	0.19504
Psmd2	5	0.53195	0.6751	1	10605	1	0.85553	0.008545	0.032139	0.400514	1455	4	0.85553
Etv5	5	0.78996	0.81046	1	13173	1	0.68383	0.0085635	0.032201	0.401007	1456	3	0.68383
Eif2b2	5	0.17187	0.33385	1	5475	2	1.1776	0.0085758	0.032239	0.401154	1457	3	1.1776
Trrap	5	0.78822	0.80938	1	13150	1	0.54227	0.0085825	0.032256	0.401154	1458	4	0.54227
Slbp	5	0.94738	0.94762	1	16061	0	0.47759	0.008603	0.032332	0.401819	1459	4	0.47759
Rtn2	7	0.96105	0.96098	1	16429	0	0.32642	0.0086289	0.037987	0.442527	1460	4	0.32642
Rprd2	5	0.8755	0.87613	1	14535	1	0.58094	0.0086398	0.032449	0.402666	1461	4	0.58094
Chchd3	5	0.6386	0.73464	1	11684	1	0.22094	0.0086544	0.032482	0.402666	1462	3	0.22094
Sh2b1	5	0.85246	0.8554	1	14115	1	0.42706	0.0086629	0.0325	0.402666	1463	4	0.42706
Adm	5	0.93485	0.93513	1	15732	0	0.38996	0.0086668	0.032509	0.402666	1464	3	0.38996
Ddit3	5	0.97353	0.97362	1	16780	0	0.67123	0.0086939	0.032582	0.403149	1465	4	0.67123
Tubgcp2	5	0.95679	0.95703	1	16317	0	1.0292	0.0087138	0.032636	0.403424	1466	3	1.0292
Rasip1	5	0.48096	0.62999	1	9878	1	0.41981	0.0087717	0.032793	0.404518	1467	4	0.41981
Gpr34	5	0.52204	0.66626	1	10449	2	0.64899	0.0087799	0.032812	0.404518	1468	3	0.64899
Papss1	5	0.94936	0.94961	1	16110	0	0.4296	0.0087803	0.032812	0.404518	1469	4	0.4296
Clip3	5	0.63937	0.73496	1	11691	1	0.36104	0.008872	0.033068	0.407156	1470	3	0.36104
Lims1	5	0.053398	0.14844	0.885074	3029	2	0.25369	0.0088827	0.033093	0.407162	1471	3	0.25369
Cops5	5	0.98965	0.98973	1	17405	0	0.57117	0.0088971	0.03313	0.407346	1472	4	0.57117
Ppp2r5c	5	0.67074	0.74813	1	11969	1	0.60608	0.0089283	0.033219	0.407899	1473	4	0.60608
Papl	5	0.84931	0.85279	1	14064	1	0.44694	0.0089287	0.03322	0.407899	1474	4	0.44694
Hist2h3c2	2	0.87413	0.87409	1	14505	0	1.1242	0.0089335	0.016939	0.272771	1475	2	1.1242
Vmn1r158	1	0.99106	0.99107	1	17460	0	2.3472	0.0089368	0.0088754	0.181513	1476	1	2.3472
Gata3	5	0.90919	0.90957	1	15202	0	0.3706	0.008941	0.033256	0.407956	1477	4	0.3706
Ndufv1	5	0.9537	0.95395	1	16226	0	0.50356	0.0089436	0.033269	0.407956	1478	4	0.50356
Dkk3	4	0.91882	0.91894	1	15404	0	0.7058	0.0089685	0.030112	0.383766	1479	3	0.7058
Upf3a	5	0.82096	0.83128	1	13598	1	0.89374	0.0089968	0.03341	0.409418	1480	4	0.89374
Klk13	5	0.724	0.7733	1	12444	1	0.49361	0.0090425	0.033543	0.410779	1481	4	0.49361
Pdcd10	4	0.92553	0.92573	1	15531	0	0.8387	0.009052	0.030387	0.384936	1482	3	0.8387
Fbxl3	5	0.83072	0.83837	1	13747	1	0.66968	0.0091036	0.033706	0.412491	1483	4	0.66968
Kctd13	5	0.56936	0.70833	1	11174	1	0.40466	0.0091501	0.03384	0.413583	1484	4	0.40466
Fcer2a	5	0.24728	0.43259	1	6876	2	0.72644	0.0091716	0.033908	0.414137	1485	3	0.72644
Gcsh	4	0.43027	0.57666	1	9171	1	0.83677	0.0091997	0.030873	0.389214	1486	3	0.83677
Rpl13a	5	0.89225	0.89269	1	14873	0	0.74753	0.0092085	0.034013	0.415149	1487	3	0.74753
Ttbk2	5	0.12233	0.25895	1	4475	1	-0.076181	0.0092191	0.03405	0.415256	1488	2	-0.076181
Ifngr1	5	0.98355	0.98366	1	17139	0	0.8559	0.0092284	0.034072	0.415256	1489	4	0.8559
Twistnb	5	0.64412	0.73689	1	11731	1	1.3996	0.0092369	0.0341	0.415256	1490	4	1.3996
Atad3a	5	0.95704	0.95727	1	16323	0	0.68156	0.0092416	0.034112	0.415256	1491	4	0.68156
Vps13a	5	0.96905	0.96918	1	16645	0	0.77168	0.0092574	0.034159	0.415557	1492	4	0.77168
Gm5591	3	0.99071	0.99085	1	17444	0	0.935	0.0092869	0.024982	0.342221	1493	3	0.935
Syn3	5	0.97888	0.979	1	16972	0	0.54756	0.009294	0.034267	0.41659	1494	4	0.54756
Pglyrp1	5	0.98318	0.98327	1	17127	0	0.63207	0.009304	0.034297	0.416681	1495	4	0.63207
Xab2	5	0.51933	0.66385	1	10412	1	0.58535	0.0093102	0.03432	0.416681	1496	4	0.58535
Ercc4	5	0.78857	0.80958	1	13154	1	0.55527	0.0093743	0.034502	0.418619	1497	3	0.55527
Psmb5	5	0.93294	0.93321	1	15696	0	1.7299	0.0094189	0.034632	0.419638	1498	4	1.7299
Jam2	5	0.65643	0.742	1	11826	1	0.24216	0.0094375	0.034698	0.420163	1499	3	0.24216
Avpi1	5	0.9386	0.93884	1	15827	0	0.40564	0.0094539	0.034748	0.420499	1500	4	0.40564
Arhgap31	5	0.98536	0.98547	1	17206	0	0.46175	0.0094777	0.034825	0.421026	1501	4	0.46175
Zc3h3	5	0.46995	0.62039	1	9718	1	0.71154	0.0094819	0.034838	0.421026	1502	3	0.71154
Irgc1	5	0.86716	0.86824	1	14368	1	0.38331	0.0095181	0.034942	0.422004	1503	4	0.38331
Vpreb1	5	0.66463	0.74547	1	11912	1	0.5538	0.00953	0.034973	0.42211	1504	4	0.5538
Atl1	5	0.6616	0.74419	1	11879	1	0.50703	0.0095715	0.035095	0.423187	1505	4	0.50703
Alg3	5	0.98697	0.98703	1	17275	0	0.65864	0.0095826	0.03513	0.423187	1506	4	0.65864
Rad51ap2	5	0.46852	0.61916	1	9692	1	0.59124	0.0096061	0.035199	0.423187	1507	3	0.59124
Nfkbib	5	0.98388	0.98399	1	17153	0	0.58336	0.009609	0.035205	0.423187	1508	4	0.58336
Prmt3	5	0.94476	0.94501	1	15997	0	0.48944	0.0096307	0.035267	0.423434	1509	4	0.48944
2310045N01Rik	5	0.97688	0.97701	1	16897	0	0.78095	0.0096808	0.035414	0.42492	1510	4	0.78095
Cept1	5	0.069438	0.17491	0.945566	3352	2	1.1226	0.009688	0.035437	0.42492	1511	3	1.1226
Nell1	5	0.78648	0.80829	1	13124	1	0.60027	0.0097027	0.035478	0.425133	1512	3	0.60027
Hspa9	5	0.89201	0.89245	1	14864	0	0.52875	0.0097188	0.035525	0.425147	1513	4	0.52875
Tacc1	5	0.11455	0.24705	1	4295	1	0.098734	0.0097188	0.035525	0.425147	1514	2	0.098734
Serpinb3b	3	0.032455	0.08099	0.741715	2234	2	-0.87243	0.0097266	0.026092	0.350687	1515	1	-0.87243
Tmem127	5	0.97416	0.97426	1	16802	0	0.50026	0.009762	0.035657	0.426241	1516	4	0.50026
Vasn	5	0.45296	0.60574	1	9480	1	0.59521	0.0097645	0.035663	0.426241	1517	4	0.59521
Cox6a1	4	0.3103	0.45193	1	7633	1	0.54947	0.0097757	0.03271	0.404063	1518	3	0.54947
Gng8	5	0.8414	0.84654	1	13919	1	0.25044	0.0098333	0.035853	0.428043	1519	3	0.25044
Snx17	5	0.96581	0.966	1	16556	0	0.65756	0.0098429	0.035877	0.428043	1520	3	0.65756
Btf3l4	5	0.75042	0.78717	1	12715	1	0.57594	0.0098814	0.036	0.428873	1521	4	0.57594
Myt1l	4	0.9901	0.99009	1	17424	0	0.21343	0.009896	0.033071	0.407156	1522	4	0.21343
Ccdc116	5	0.92764	0.92796	1	15581	0	0.35814	0.0099003	0.03606	0.429224	1523	4	0.35814
Klk1b11	5	0.9936	0.99362	1	17578	0	0.49527	0.0099648	0.036219	0.430645	1524	4	0.49527
Pex11a	5	0.98154	0.98167	1	17062	0	0.78483	0.0099888	0.036298	0.430926	1525	3	0.78483
Ust	5	0.96433	0.96452	1	16512	0	0.37398	0.0099914	0.036303	0.430926	1526	4	0.37398
Gtf3c6	5	0.56393	0.70407	1	11102	1	0.98518	0.0099963	0.036318	0.430926	1527	3	0.98518
Ehbp1l1	5	0.97862	0.97875	1	16963	0	0.43944	0.010003	0.036336	0.430926	1528	4	0.43944
Adam8	5	0.9591	0.9593	1	16379	0	0.43366	0.01002	0.036386	0.431117	1529	4	0.43366
Vmn2r51	5	0.84627	0.85037	1	14008	1	0.89895	0.010026	0.036399	0.431117	1530	3	0.89895
Mboat1	5	0.17566	0.33937	1	5548	1	0.53234	0.010045	0.036444	0.431374	1531	4	0.53234
Rab20	5	0.99245	0.99252	1	17523	0	0.48917	0.010077	0.036536	0.432192	1532	4	0.48917
Sec23ip	5	0.93597	0.93626	1	15768	0	0.40203	0.010087	0.036564	0.432238	1533	4	0.40203
Gm5113	5	0.99146	0.99153	1	17478	0	0.57522	0.010095	0.036593	0.432304	1534	4	0.57522
Ik	5	0.663	0.74481	1	11897	1	1.1343	0.010111	0.036635	0.432454	1535	3	1.1343
Ndufa13	4	0.98988	0.98986	1	17413	0	0.50322	0.010117	0.033754	0.412805	1536	4	0.50322
Cebpz	5	0.79705	0.81493	1	13265	1	0.99128	0.010119	0.036653	0.432454	1537	4	0.99128
Fh1	5	0.90507	0.90546	1	15125	0	0.52361	0.01014	0.036715	0.432913	1538	4	0.52361
Fdx1l	5	0.72144	0.77202	1	12419	1	0.15672	0.010184	0.036866	0.434411	1539	2	0.15672
Esrra	5	0.1113	0.24196	1	4225	1	0.68675	0.010198	0.036901	0.434551	1540	3	0.68675
Sphk2	5	0.94706	0.94732	1	16053	0	0.54294	0.010265	0.037102	0.436639	1541	3	0.54294
Kptn	5	0.96444	0.96464	1	16517	0	0.35888	0.010282	0.037145	0.436639	1542	4	0.35888
Kif22	5	0.89799	0.89838	1	14976	0	0.68077	0.010283	0.03715	0.436639	1543	4	0.68077
Phkg2	5	0.9881	0.98813	1	17322	0	0.44405	0.01035	0.03733	0.437716	1544	4	0.44405
Poc1b	5	0.90325	0.90363	1	15084	0	0.61646	0.010366	0.037372	0.437716	1545	3	0.61646
Fam189a1	5	0.98653	0.98661	1	17256	0	0.38404	0.010371	0.037397	0.437716	1546	4	0.38404
Osgepl1	5	0.98067	0.98082	1	17034	0	0.49455	0.010375	0.037405	0.437716	1547	4	0.49455
Vmn1r25	5	0.50711	0.65307	1	10235	2	1.0742	0.01038	0.03742	0.437716	1548	3	1.0742
Klk1b24	4	0.98962	0.9896	1	17402	0	0.59621	0.010385	0.034614	0.419638	1549	4	0.59621
Pacsin2	5	0.58981	0.71567	1	11315	1	0.38044	0.010385	0.037432	0.437716	1550	4	0.38044
Cdk2	5	0.66929	0.74748	1	11958	1	0.56134	0.010485	0.037727	0.44061	1551	3	0.56134
Pm20d1	5	0.6429	0.73641	1	11722	1	0.36645	0.010495	0.037752	0.440619	1552	4	0.36645
Cenpo	5	0.97254	0.97264	1	16749	0	0.75032	0.010527	0.037853	0.44152	1553	4	0.75032
Lnpep	4	0.98943	0.98943	1	17392	0	0.45859	0.010572	0.035212	0.423187	1554	4	0.45859
Rbm4b	4	0.98943	0.98943	1	17391	0	0.5962	0.010575	0.035223	0.423187	1555	4	0.5962
D10Wsu102e	5	0.90648	0.90685	1	15155	0	0.10767	0.010635	0.038155	0.444201	1556	2	0.10767
Pigu	5	0.70943	0.76609	1	12308	1	0.33656	0.01069	0.038292	0.445516	1557	3	0.33656
Ppt2	5	0.98594	0.98604	1	17229	0	0.63968	0.01071	0.038348	0.445885	1558	3	0.63968
Vmn2r42	1	0.98929	0.98933	1	17384	0	3.0782	0.010714	0.010617	0.20403	1559	1	3.0782
Sec31a	5	0.98527	0.98538	1	17205	0	0.58404	0.010738	0.038424	0.446482	1560	3	0.58404
Tmem126a	5	0.32505	0.49684	1	7824	1	0.78587	0.010758	0.038477	0.446671	1561	4	0.78587
1700055N04Rik	5	0.99326	0.99328	1	17564	0	0.46966	0.010762	0.038489	0.446671	1562	4	0.46966
Mipep	4	0.98921	0.98922	1	17381	0	0.35598	0.010793	0.035883	0.428043	1563	4	0.35598
Lilra6	5	0.92128	0.92162	1	15453	0	0.72357	0.010796	0.03859	0.447569	1564	4	0.72357
Rtn4ip1	5	0.98861	0.98866	1	17347	0	0.40927	0.010842	0.038717	0.448676	1565	4	0.40927
Paics	5	0.83649	0.84279	1	13846	1	0.43129	0.010847	0.038734	0.448676	1566	3	0.43129
Peg12	5	0.87703	0.87759	1	14565	1	0.62598	0.010858	0.038762	0.448714	1567	3	0.62598
Mrpl20	5	0.95006	0.9503	1	16126	0	0.79267	0.010889	0.038851	0.449462	1568	4	0.79267
Zfp579	5	0.74381	0.78354	1	12642	1	0.28831	0.010916	0.038933	0.450131	1569	3	0.28831
Msx3	5	0.90315	0.90354	1	15081	0	0.35778	0.010925	0.038965	0.450215	1570	4	0.35778
Znhit2	5	0.95365	0.95389	1	16223	0	0.63431	0.010962	0.039081	0.451275	1571	3	0.63431
Atp8b3	5	0.98588	0.98598	1	17227	0	0.52416	0.010984	0.039155	0.451842	1572	4	0.52416
Xpo6	5	0.98911	0.98918	1	17373	0	0.49923	0.010995	0.039186	0.451919	1573	4	0.49923
Nop16	5	0.45679	0.60911	1	9523	2	0.94461	0.011013	0.039243	0.452293	1574	3	0.94461
Ino80e	5	0.77276	0.79996	1	12957	1	0.45357	0.011052	0.039351	0.453249	1575	4	0.45357
4931417E11Rik	5	0.90541	0.9058	1	15132	0	0.63245	0.011091	0.039483	0.454483	1576	3	0.63245
Mrpl13	5	0.98555	0.98565	1	17213	0	0.69448	0.011125	0.039582	0.455337	1577	4	0.69448
Dtnbp1	5	0.83093	0.83854	1	13749	1	0.5457	0.011198	0.039795	0.456931	1578	4	0.5457
Mta2	5	0.27001	0.45127	1	7140	1	0.36758	0.011249	0.039923	0.458115	1579	4	0.36758
Gtf3c5	5	0.68106	0.75279	1	12048	1	0.68545	0.011259	0.03995	0.458138	1580	4	0.68545
Rundc3b	4	0.98873	0.98875	1	17352	0	0.61334	0.011269	0.037358	0.437716	1581	4	0.61334
Cox8a	4	0.97988	0.98005	1	17009	0	0.57423	0.011366	0.037671	0.440242	1582	3	0.57423
Asap2	5	0.99217	0.99223	1	17511	0	0.55329	0.011366	0.040248	0.460695	1583	4	0.55329
Krtap22-2	3	0.87664	0.87672	1	14556	0	0.87435	0.011405	0.030365	0.384936	1584	2	0.87435
Dek	5	0.94079	0.94103	1	15885	0	0.64879	0.011424	0.040416	0.462334	1585	4	0.64879
Krtap19-5	4	0.97891	0.97911	1	16973	0	0.8526	0.011431	0.037887	0.441635	1586	3	0.8526
Rab32	5	0.91363	0.91396	1	15299	0	0.50015	0.011435	0.040449	0.462422	1587	4	0.50015
Ptdss2	5	0.97028	0.97039	1	16678	0	0.50093	0.011452	0.040497	0.462688	1588	3	0.50093
Vmn2r35	3	0.9822	0.98239	1	17089	0	1.4702	0.011486	0.030561	0.386339	1589	3	1.4702
Zbtb42	5	0.99307	0.9931	1	17554	0	0.5008	0.011491	0.040613	0.463601	1590	4	0.5008
Brca2	5	0.93328	0.93354	1	15703	0	0.72737	0.011501	0.040645	0.463601	1591	3	0.72737
Wnt8b	5	0.96541	0.96562	1	16546	0	0.61714	0.011504	0.040653	0.463601	1592	4	0.61714
Map1s	5	0.85405	0.85675	1	14141	1	0.64526	0.011523	0.040707	0.463933	1593	4	0.64526
Ythdc1	5	0.80179	0.81803	1	13313	1	0.4766	0.011538	0.040748	0.464118	1594	4	0.4766
Tmtc3	5	0.87667	0.87724	1	14557	1	0.50203	0.011571	0.040836	0.464823	1595	4	0.50203
Phb2	5	0.96283	0.96304	1	16477	0	0.9411	0.011626	0.040989	0.46628	1596	3	0.9411
Adad2	5	0.97645	0.9766	1	16879	0	0.6208	0.011665	0.04111	0.467299	1597	4	0.6208
Rsl1d1	5	0.2486	0.43367	1	6894	1	0.42493	0.011672	0.041129	0.467299	1598	4	0.42493
Atp6v0c	5	0.7901	0.81054	1	13174	1	0.92494	0.011694	0.041195	0.467756	1599	4	0.92494
Cinp	5	0.42073	0.57791	1	9039	2	0.63597	0.011728	0.041289	0.468536	1600	3	0.63597
Ccdc110	5	0.95788	0.95809	1	16348	0	0.50826	0.011744	0.041327	0.46868	1601	4	0.50826
Rdh12	5	0.83285	0.84	1	13783	1	0.34584	0.011823	0.04155	0.470916	1602	4	0.34584
Fkbp8	5	0.87685	0.87741	1	14560	1	0.56821	0.011837	0.041596	0.471153	1603	3	0.56821
B9d2	5	0.88912	0.88961	1	14812	0	0.37303	0.01185	0.041641	0.471366	1604	4	0.37303
Hnrnpab	5	0.95845	0.95865	1	16364	0	0.65854	0.01189	0.041751	0.472309	1605	4	0.65854
Med7	5	0.68495	0.75456	1	12080	1	1.3245	0.0119	0.04178	0.472309	1606	3	1.3245
Shh	5	0.71136	0.76705	1	12325	1	0.51007	0.011907	0.041801	0.472309	1607	3	0.51007
Rgs16	5	0.97599	0.97615	1	16854	0	0.67126	0.011929	0.041864	0.47273	1608	4	0.67126
Siglec5	5	0.8887	0.8892	1	14803	0	0.6103	0.01195	0.041935	0.473025	1609	4	0.6103
Ppp6r3	5	0.99321	0.99323	1	17562	0	0.71101	0.011964	0.041966	0.473025	1610	4	0.71101
Vps18	5	0.9924	0.99248	1	17519	0	0.41972	0.011965	0.041967	0.473025	1611	4	0.41972
Bad	5	0.99133	0.99142	1	17471	0	0.57913	0.011984	0.042021	0.473167	1612	4	0.57913
Med17	5	0.7427	0.78292	1	12631	1	1.035	0.011986	0.042031	0.473167	1613	4	1.035
Rc3h1	4	0.98799	0.98804	1	17316	0	0.57753	0.012008	0.039654	0.455882	1614	4	0.57753
Zfp639	5	0.2357	0.42305	1	6738	2	-0.15863	0.012015	0.042116	0.4735	1615	2	-0.15863
Hells	5	0.79394	0.81294	1	13229	1	0.45219	0.012023	0.042139	0.4735	1616	4	0.45219
Eno1	4	0.98797	0.98802	1	17315	0	0.53917	0.012027	0.039711	0.456252	1617	4	0.53917
Zswim8	5	0.38158	0.54449	1	8547	1	0.62882	0.012028	0.042151	0.4735	1618	4	0.62882
D2Wsu81e	5	0.85232	0.85528	1	14113	1	0.82609	0.012036	0.042178	0.4735	1619	3	0.82609
2610034B18Rik	5	0.97771	0.97785	1	16927	0	0.48086	0.012039	0.042189	0.4735	1620	4	0.48086
Rhox8	5	0.10411	0.23067	1	4077	2	-0.14128	0.012097	0.04236	0.474359	1621	1	-0.14128
Gm597	5	0.90655	0.90692	1	15157	0	-0.068674	0.012097	0.04236	0.474359	1622	1	-0.068674
Ube2cbp	5	0.99328	0.99331	1	17567	0	0.46012	0.012101	0.042369	0.474359	1623	4	0.46012
Pop5	5	0.2771	0.45714	1	7243	1	0.33833	0.01213	0.042442	0.474883	1624	3	0.33833
Hrc	5	0.98814	0.98817	1	17325	0	0.50755	0.012145	0.042487	0.474884	1625	4	0.50755
Fam189a2	5	0.96075	0.96091	1	16420	0	0.27266	0.012159	0.04253	0.474884	1626	3	0.27266
Pgm3	5	0.89501	0.89547	1	14920	0	0.42646	0.012181	0.04259	0.474885	1627	4	0.42646
Dynll2	5	0.27303	0.4538	1	7192	2	0.69891	0.012203	0.042648	0.474885	1628	3	0.69891
Zscan2	5	0.76243	0.79393	1	12848	1	0.49778	0.012203	0.042648	0.474885	1629	3	0.49778
Triap1	5	0.23522	0.42266	1	6733	2	1.0601	0.01222	0.042698	0.474904	1630	3	1.0601
Gatad1	5	0.89361	0.89406	1	14898	0	0.628	0.012221	0.042702	0.474904	1631	4	0.628
Tle6	5	0.93963	0.93987	1	15850	0	0.40658	0.012232	0.042734	0.474981	1632	4	0.40658
Iyd	5	0.93701	0.93728	1	15791	0	0.53417	0.012265	0.042838	0.475668	1633	4	0.53417
Sssca1	5	0.96297	0.96318	1	16480	0	0.53992	0.012275	0.042863	0.475668	1634	4	0.53992
Pelp1	5	0.22314	0.40725	1	6520	1	0.96523	0.012284	0.042894	0.475668	1635	3	0.96523
Palb2	5	0.73329	0.77799	1	12534	1	0.52946	0.012289	0.042907	0.475668	1636	4	0.52946
Mamdc2	5	0.96068	0.96085	1	16418	0	0.59431	0.012296	0.042925	0.475668	1637	3	0.59431
Npy1r	5	0.23789	0.42491	1	6760	2	0.50559	0.012334	0.043031	0.476549	1638	3	0.50559
Csta	5	0.663	0.74481	1	11895	1	0.49807	0.012384	0.04318	0.477636	1639	4	0.49807
R3hcc1l	5	0.90035	0.90072	1	15020	0	1.0349	0.012385	0.043181	0.477636	1640	3	1.0349
Pdf	5	0.85051	0.85382	1	14081	1	0.50011	0.012421	0.043299	0.478416	1641	3	0.50011
Hbp1	5	0.91892	0.91925	1	15406	0	0.52186	0.01243	0.043323	0.478416	1642	4	0.52186
Cenpa	5	0.91421	0.91452	1	15309	0	0.90044	0.012432	0.043329	0.478416	1643	3	0.90044
Ntrk3	5	0.93215	0.93243	1	15681	0	0.54964	0.012455	0.043387	0.47877	1644	4	0.54964
Lpxn	5	0.98404	0.98414	1	17155	0	0.36715	0.012513	0.043545	0.480222	1645	4	0.36715
Rpl37a	1	0.98746	0.98751	1	17297	0	2.2049	0.012536	0.012428	0.224343	1646	1	2.2049
Wdr26	5	0.992	0.99206	1	17505	0	0.59379	0.012569	0.043695	0.481472	1647	4	0.59379
Tmem121	5	0.86477	0.86607	1	14319	1	0.5428	0.01259	0.04376	0.481723	1648	4	0.5428
Gars	5	0.38407	0.54663	1	8580	1	0.92227	0.0126	0.043788	0.481749	1649	3	0.92227
Med6	5	0.87792	0.87845	1	14579	1	1.216	0.012614	0.043836	0.481981	1650	3	1.216
Slc37a3	5	0.69148	0.75758	1	12135	1	0.52645	0.012648	0.043929	0.482428	1651	3	0.52645
Asxl1	5	0.8733	0.87402	1	14493	1	0.33203	0.012682	0.044031	0.483268	1652	3	0.33203
Cd5l	5	0.11833	0.25291	1	4391	3	-0.17156	0.012706	0.044101	0.483747	1653	1	-0.17156
Mapk8ip2	5	0.67913	0.75189	1	12036	1	0.41776	0.012766	0.044256	0.484863	1654	4	0.41776
Rbm42	5	0.89115	0.8916	1	14849	0	0.6539	0.012789	0.04433	0.485381	1655	4	0.6539
Eif5a	5	0.68454	0.75439	1	12078	1	0.8887	0.012801	0.044366	0.485381	1656	3	0.8887
Tbx10	5	0.93558	0.93584	1	15757	0	0.42908	0.012807	0.044382	0.485381	1657	4	0.42908
Nsun2	5	0.62316	0.72839	1	11550	1	0.56493	0.012885	0.044612	0.487609	1658	3	0.56493
Smpd1	5	0.91893	0.91926	1	15407	0	0.44641	0.012931	0.044733	0.488636	1659	3	0.44641
Cyp2j6	4	0.10607	0.22542	1	4121	3	-0.33473	0.012948	0.042545	0.474884	1660	1	-0.33473
Zc3h12d	5	0.9598	0.95999	1	16397	0	0.37629	0.01296	0.044826	0.489362	1661	4	0.37629
Tacc2	5	0.69625	0.75977	1	12180	1	0.31377	0.012996	0.044917	0.489952	1662	4	0.31377
Brix1	5	0.78159	0.80528	1	13066	1	0.839	0.013008	0.044946	0.489952	1663	4	0.839
Rrn3	5	0.95945	0.95966	1	16387	0	0.54452	0.013012	0.04496	0.489952	1664	4	0.54452
Srsf10	5	0.96907	0.96919	1	16647	0	0.44835	0.013034	0.045022	0.490336	1665	4	0.44835
Lonp1	5	0.82042	0.83092	1	13588	1	0.73424	0.01307	0.045119	0.490894	1666	3	0.73424
Mfng	5	0.82353	0.83309	1	13645	1	0.2494	0.01308	0.045145	0.490894	1667	3	0.2494
E2f8	5	0.5971	0.71845	1	11370	1	0.40582	0.013082	0.045153	0.490894	1668	3	0.40582
Pkd1l2	5	0.90002	0.9004	1	15012	0	0.33718	0.013123	0.045267	0.49185	1669	4	0.33718
Abcc5	5	0.99162	0.99169	1	17486	0	0.65824	0.013142	0.045319	0.492114	1670	4	0.65824
Hnrnpf	1	0.98684	0.98687	1	17271	0	2.501	0.013162	0.013042	0.231713	1671	1	2.501
Gde1	5	0.8503	0.85361	1	14075	1	0.60153	0.013182	0.045447	0.493219	1672	3	0.60153
Cnih2	5	0.98155	0.98168	1	17063	0	0.52099	0.013216	0.045548	0.494026	1673	4	0.52099
Tmem2	5	0.9444	0.94464	1	15990	0	0.42674	0.013296	0.045758	0.495412	1674	4	0.42674
Stra8	5	0.34879	0.51673	1	8128	2	-0.15598	0.013313	0.045805	0.495412	1675	2	-0.15598
Zfp719	5	0.97137	0.9715	1	16714	0	0.93265	0.013335	0.045868	0.495412	1676	3	0.93265
Acd	5	0.98415	0.98425	1	17161	0	0.31687	0.013335	0.045868	0.495412	1677	4	0.31687
Glmn	5	0.83628	0.84263	1	13840	1	0.81166	0.013342	0.045889	0.495412	1678	4	0.81166
Ppp1r12c	5	0.97953	0.97966	1	16994	0	0.47611	0.013342	0.04589	0.495412	1679	3	0.47611
Prkcdbp	5	0.88447	0.88497	1	14713	0	0.14126	0.013343	0.045891	0.495412	1680	2	0.14126
Rps10	4	0.98661	0.98659	1	17260	0	1.0044	0.01339	0.043892	0.482314	1681	4	1.0044
Hps6	5	0.98174	0.98188	1	17075	0	0.38386	0.013406	0.046054	0.496538	1682	4	0.38386
Stard7	5	0.94004	0.94028	1	15860	0	0.61163	0.01345	0.046188	0.496538	1683	4	0.61163
Plk1	5	0.86241	0.86394	1	14276	1	0.21134	0.013452	0.046197	0.496538	1684	2	0.21134
Hars	5	0.61012	0.72335	1	11455	1	0.29671	0.013452	0.046197	0.496538	1685	4	0.29671
Luzp1	5	0.038066	0.11111	0.820652	2460	3	-0.73397	0.013452	0.046197	0.496538	1686	2	-0.73397
Fam122b	5	0.34834	0.51636	1	8121	2	0.019406	0.013452	0.046197	0.496538	1687	2	0.019406
Fam111a	5	0.95924	0.95944	1	16383	0	0.20531	0.013456	0.046212	0.496538	1688	2	0.20531
Psmb7	5	0.87932	0.87985	1	14605	1	1.5152	0.013475	0.046261	0.49678	1689	4	1.5152
Slc25a39	5	0.90162	0.90201	1	15047	0	0.33369	0.013514	0.046361	0.497274	1690	4	0.33369
Dnajb13	5	0.9629	0.96312	1	16479	0	0.68873	0.013524	0.046392	0.497313	1691	4	0.68873
Nol12	5	0.99092	0.99098	1	17451	0	0.74237	0.013559	0.046487	0.497971	1692	4	0.74237
Zfp14	5	0.99019	0.99025	1	17427	0	0.77556	0.013569	0.046521	0.497971	1693	4	0.77556
Timmdc1	5	0.97735	0.97749	1	16917	0	0.58239	0.013572	0.046534	0.497971	1694	3	0.58239
Cep78	5	0.82872	0.83688	1	13723	1	0.27739	0.013586	0.046573	0.498096	1695	4	0.27739
2410089E03Rik	5	0.95992	0.96012	1	16401	0	0.48797	0.013606	0.046623	0.498341	1696	4	0.48797
Zfyve20	5	0.50647	0.65246	1	10226	1	0.83086	0.013623	0.046663	0.498483	1697	3	0.83086
Nupr1l	5	0.6162	0.72573	1	11504	1	0.39771	0.013639	0.046706	0.498485	1698	4	0.39771
Dnajb8	5	0.98949	0.98957	1	17396	0	0.38423	0.013642	0.046718	0.498485	1699	4	0.38423
Ppp1r2	3	0.98635	0.98652	1	17245	0	0.97258	0.013648	0.035953	0.428593	1700	3	0.97258
Tmem138	5	0.70717	0.765	1	12281	1	0.51501	0.01368	0.04683	0.499389	1701	4	0.51501
Lyrm7	3	0.9863	0.98647	1	17244	0	0.67588	0.013698	0.036076	0.429224	1702	3	0.67588
Denr	5	0.88937	0.88985	1	14814	0	0.38039	0.013701	0.046893	0.499776	1703	3	0.38039
Cox7b	5	0.44911	0.60241	1	9427	2	0.19619	0.013727	0.046967	0.500278	1704	2	0.19619
Cd2bp2	5	0.80048	0.81716	1	13300	1	0.84845	0.013745	0.047025	0.500601	1705	4	0.84845
1810033B17Rik	5	0.57024	0.70863	1	11180	1	0.074598	0.013756	0.047063	0.500718	1706	1	0.074598
Fkbp2	5	0.97608	0.97624	1	16860	0	0.76009	0.013823	0.047257	0.502204	1707	4	0.76009
Krt23	5	0.98599	0.98608	1	17234	0	0.33108	0.013852	0.047339	0.502744	1708	4	0.33108
Psip1	5	0.75675	0.79064	1	12784	1	0.77948	0.013861	0.047363	0.502744	1709	3	0.77948
2900026A02Rik	5	0.33809	0.5078	1	7986	1	0.40189	0.013973	0.047675	0.505478	1710	4	0.40189
Rpl18a	2	0.98598	0.98606	1	17233	0	1.4681	0.014018	0.026294	0.352983	1711	2	1.4681
Csnk2b	5	0.38464	0.54711	1	8587	2	0.75095	0.014018	0.047789	0.506395	1712	3	0.75095
Arcn1	5	0.98913	0.9892	1	17376	0	0.6955	0.01405	0.04788	0.506771	1713	4	0.6955
Ndufb8	5	0.93307	0.93333	1	15699	0	0.44629	0.014057	0.047902	0.506771	1714	4	0.44629
Col4a1	5	0.93067	0.93097	1	15652	0	0.50445	0.014071	0.047938	0.506771	1715	4	0.50445
Nubp2	5	0.32347	0.4955	1	7797	2	0.75808	0.014081	0.047974	0.506771	1716	3	0.75808
Ifnl2	5	0.29675	0.47337	1	7469	2	0.54308	0.014085	0.047982	0.506771	1717	3	0.54308
Drap1	5	0.096662	0.21888	1	3917	2	0.57738	0.014088	0.04799	0.506771	1718	3	0.57738
Psap	5	0.99146	0.99153	1	17477	0	0.64199	0.014103	0.048031	0.506918	1719	4	0.64199
Fbxo25	5	0.98954	0.98962	1	17397	0	0.32361	0.014131	0.048093	0.507068	1720	4	0.32361
Cxcl3	5	0.8803	0.8808	1	14624	1	0.38855	0.014133	0.048101	0.507068	1721	4	0.38855
Rlim	5	0.92729	0.92762	1	15574	0	0.67098	0.014163	0.048182	0.50764	1722	3	0.67098
Cnrip1	5	0.73379	0.77825	1	12538	1	0.5564	0.014174	0.048223	0.507774	1723	4	0.5564
Dhps	5	0.84846	0.85211	1	14044	1	0.47859	0.014232	0.048391	0.50925	1724	4	0.47859
Hepacam2	5	0.9476	0.94785	1	16066	0	0.48484	0.01431	0.048603	0.510947	1725	3	0.48484
1810009A15Rik	5	0.39848	0.55899	1	8760	2	0.45389	0.014312	0.048607	0.510947	1726	3	0.45389
Cacng5	5	0.07155	0.17835	0.95429	3389	1	0.56928	0.014323	0.048635	0.510949	1727	3	0.56928
Cpeb1	5	0.75307	0.78862	1	12748	1	0.45219	0.014334	0.048671	0.511031	1728	4	0.45219
Zfp444	5	0.96906	0.96918	1	16646	0	0.5711	0.014368	0.048761	0.511688	1729	4	0.5711
Aldh18a1	5	0.66763	0.74677	1	11941	1	0.42977	0.014391	0.048823	0.51181	1730	4	0.42977
Ncstn	5	0.88307	0.88355	1	14681	0	0.44976	0.014424	0.04891	0.512269	1731	4	0.44976
Rps9	4	0.86846	0.86848	1	14398	0	0.69964	0.014429	0.04716	0.501459	1732	2	0.69964
Cblc	5	0.97983	0.97998	1	17007	0	0.36968	0.014432	0.048928	0.512269	1733	4	0.36968
Zfp143	5	0.55595	0.6968	1	10974	1	0.5682	0.014465	0.049026	0.512767	1734	4	0.5682
Slc16a1	5	0.80756	0.82194	1	13393	1	0.43008	0.014467	0.049031	0.512767	1735	3	0.43008
Wbp1l	5	0.87556	0.8762	1	14536	1	0.49995	0.0145	0.049115	0.513326	1736	4	0.49995
Igsf6	5	0.17197	0.33398	1	5481	1	0.6635	0.014509	0.049141	0.513326	1737	3	0.6635
Lpar2	5	0.9283	0.92861	1	15598	0	0.37426	0.014574	0.049325	0.514198	1738	4	0.37426
Minpp1	5	0.89631	0.89676	1	14940	0	0.62048	0.014579	0.049336	0.514198	1739	4	0.62048
Tgs1	5	0.65187	0.74009	1	11790	1	0.80834	0.014613	0.049437	0.514541	1740	3	0.80834
Rfc4	5	0.14305	0.29086	1	4891	2	0.7851	0.014622	0.049463	0.514541	1741	3	0.7851
Polr3b	5	0.46649	0.61741	1	9668	2	0.13886	0.014628	0.04948	0.514541	1742	2	0.13886
Zfp622	5	0.99245	0.99251	1	17521	0	0.52888	0.014644	0.049521	0.51467	1743	4	0.52888
Sugp1	5	0.60338	0.72081	1	11409	1	0.68894	0.014663	0.049568	0.514871	1744	4	0.68894
Rpe	5	0.95175	0.95199	1	16173	0	0.6847	0.014677	0.049602	0.514932	1745	4	0.6847
Xpr1	5	0.87118	0.87196	1	14448	1	0.65696	0.014688	0.049637	0.515005	1746	4	0.65696
Ccdc86	5	0.8669	0.86801	1	14365	1	0.44508	0.014711	0.049694	0.5153	1747	4	0.44508
Mppe1	5	0.94585	0.94612	1	16021	0	0.45283	0.014721	0.049721	0.5153	1748	4	0.45283
Ttc13	5	0.96597	0.96614	1	16560	0	0.63622	0.014736	0.049758	0.515384	1749	4	0.63622
Maats1	5	0.41292	0.57131	1	8939	1	0.6615	0.014763	0.04984	0.515778	1750	3	0.6615
Ptov1	5	0.62183	0.72788	1	11541	1	0.6047	0.014807	0.049976	0.516773	1751	4	0.6047
Obox3	2	0.19003	0.25134	1	5852	1	0.67725	0.014822	0.027711	0.365893	1752	1	0.67725
Dld	5	0.97682	0.97696	1	16894	0	0.66289	0.014833	0.050042	0.517161	1753	3	0.66289
1700001J03Rik	5	0.62516	0.72919	1	11572	1	0.49204	0.014868	0.050141	0.517675	1754	4	0.49204
Ropn1	5	0.9044	0.9048	1	15115	0	0.44292	0.014872	0.050147	0.517675	1755	4	0.44292
Exoc8	5	0.85643	0.85873	1	14177	1	0.62432	0.014894	0.050219	0.518123	1756	4	0.62432
Srsf1	5	0.87509	0.87575	1	14521	1	0.85709	0.014921	0.050293	0.518308	1757	3	0.85709
Myof	5	0.70772	0.76527	1	12288	1	0.53499	0.014948	0.050366	0.518771	1758	3	0.53499
Babam1	5	0.98425	0.98435	1	17167	0	0.47245	0.014977	0.050446	0.519295	1759	4	0.47245
Vars2	5	0.94241	0.94263	1	15934	0	0.47869	0.015018	0.050556	0.52014	1760	4	0.47869
Rassf7	5	0.99125	0.99134	1	17467	0	0.46326	0.015033	0.050601	0.520309	1761	4	0.46326
Sympk	5	0.97412	0.97421	1	16801	0	0.86953	0.015068	0.050694	0.520309	1762	4	0.86953
G6pc	5	0.025938	0.07965	0.737818	1962	2	0.17398	0.015082	0.050731	0.520309	1763	2	0.17398
Zfp105	5	0.11634	0.24985	1	4342	3	-0.24926	0.015082	0.050731	0.520309	1764	1	-0.24926
Adap1	5	0.22996	0.41692	1	6639	1	0.6042	0.015083	0.050732	0.520309	1765	3	0.6042
Rpl7l1	5	0.9637	0.9639	1	16500	0	0.63172	0.015087	0.050742	0.520309	1766	4	0.63172
B3galt2	5	0.75379	0.78901	1	12752	1	0.5102	0.015156	0.050932	0.521681	1767	4	0.5102
Drg2	5	0.99212	0.99218	1	17510	0	0.48325	0.015187	0.051019	0.522003	1768	4	0.48325
Bbc3	5	0.98964	0.98972	1	17404	0	0.56657	0.015187	0.051021	0.522003	1769	4	0.56657
Fam162b	5	0.42602	0.58246	1	9111	1	0.48238	0.015203	0.051072	0.522236	1770	4	0.48238
Vmn1r171	2	0.98476	0.98485	1	17185	0	0.96501	0.015241	0.028482	0.370744	1771	2	0.96501
Rpl36al	5	0.99137	0.99146	1	17472	0	0.63373	0.015296	0.051343	0.524151	1772	4	0.63373
Srfbp1	5	0.77907	0.80377	1	13035	1	0.25585	0.015297	0.051344	0.524151	1773	2	0.25585
Hyou1	4	0.77177	0.77572	1	12947	1	0.62907	0.015304	0.049852	0.515778	1774	3	0.62907
E4f1	5	0.9587	0.95891	1	16371	0	0.69349	0.015358	0.051512	0.525573	1775	4	0.69349
Cacng8	5	0.98558	0.98569	1	17215	0	0.40113	0.015393	0.051617	0.526351	1776	4	0.40113
Vps39	5	0.98007	0.98021	1	17016	0	0.54669	0.015406	0.051646	0.526351	1777	4	0.54669
Rps8	2	0.62108	0.62089	1	11538	0	1.5416	0.015433	0.028822	0.373329	1778	1	1.5416
Spcs3	4	0.73121	0.74374	1	12511	1	0.54148	0.015447	0.050291	0.518308	1779	2	0.54148
Mogat2	5	0.41504	0.57309	1	8961	1	0.64859	0.015456	0.051789	0.527432	1780	3	0.64859
Gm166	5	0.9842	0.9843	1	17164	0	0.30878	0.015475	0.051838	0.527432	1781	4	0.30878
BC048609	5	0.88612	0.8866	1	14749	0	0.44012	0.01552	0.051966	0.528407	1782	4	0.44012
Eif3j1	5	0.85554	0.85799	1	14164	1	0.39166	0.015528	0.051991	0.528407	1783	4	0.39166
Pebp1	5	0.38242	0.54521	1	8557	1	0.51499	0.015551	0.05205	0.528633	1784	3	0.51499
Txnl4b	5	0.86019	0.86197	1	14240	1	0.96079	0.015561	0.052071	0.528633	1785	4	0.96079
Pkd2l1	5	0.53	0.67337	1	10574	1	0.37297	0.015575	0.052111	0.528669	1786	4	0.37297
Nell2	5	0.87287	0.87362	1	14484	1	0.38913	0.015591	0.052163	0.528669	1787	4	0.38913
Aasdhppt	5	0.5317	0.67488	1	10601	1	0.93441	0.015594	0.052172	0.528669	1788	3	0.93441
Slc35g1	5	0.9927	0.99275	1	17535	0	0.40964	0.015615	0.052229	0.528669	1789	4	0.40964
Sult1a1	5	0.90095	0.90134	1	15033	0	0.67692	0.015616	0.052231	0.528669	1790	3	0.67692
Srd5a3	4	0.90854	0.90864	1	15193	0	0.64692	0.015618	0.050822	0.520841	1791	3	0.64692
Mettl21a	5	0.98837	0.98843	1	17336	0	0.48922	0.015621	0.052246	0.528669	1792	4	0.48922
Slc10a4	5	0.94672	0.94696	1	16044	0	0.32311	0.015641	0.052303	0.528806	1793	4	0.32311
Gse1	5	0.99075	0.99082	1	17445	0	0.43647	0.015681	0.05242	0.529548	1794	4	0.43647
Vmn2r69	4	0.98429	0.98434	1	17169	0	0.58516	0.015714	0.05112	0.522441	1795	4	0.58516
Ikzf4	5	0.97808	0.97823	1	16939	0	0.34045	0.015725	0.052543	0.530501	1796	4	0.34045
Saa1	5	0.6387	0.73469	1	11685	1	0.43455	0.015756	0.052638	0.531171	1797	4	0.43455
Grik5	5	0.4441	0.59804	1	9359	1	0.55612	0.015788	0.05273	0.531808	1798	3	0.55612
Olig2	5	0.95365	0.9539	1	16224	0	0.31408	0.015825	0.052816	0.532087	1799	4	0.31408
Prc1	5	0.56949	0.70838	1	11176	1	0.44965	0.015868	0.052949	0.53314	1800	4	0.44965
Lats1	5	0.97816	0.97831	1	16944	0	0.37024	0.01589	0.053004	0.533239	1801	4	0.37024
Dync1h1	5	0.99141	0.99149	1	17474	0	0.71776	0.015894	0.053017	0.533239	1802	4	0.71776
Hist1h3g	2	0.9841	0.98417	1	17159	0	1.6462	0.015902	0.029649	0.380144	1803	2	1.6462
9130023H24Rik	5	0.97668	0.97682	1	16888	0	0.46132	0.015907	0.053054	0.533321	1804	4	0.46132
Ccdc90b	5	0.72497	0.7738	1	12456	1	0.39321	0.015932	0.053129	0.533706	1805	4	0.39321
Rab14	5	0.74492	0.78415	1	12656	1	0.45724	0.01595	0.053178	0.533706	1806	4	0.45724
Pdlim7	5	0.95544	0.9557	1	16278	0	0.41763	0.01595	0.053179	0.533706	1807	4	0.41763
Alkbh6	5	0.44867	0.60205	1	9421	1	0.50568	0.016083	0.053553	0.536873	1808	4	0.50568
Extl3	5	0.97831	0.97844	1	16950	0	0.6262	0.016114	0.053656	0.537023	1809	4	0.6262
Scgb1a1	5	0.941	0.94125	1	15891	0	0.34166	0.016118	0.053665	0.537023	1810	4	0.34166
Nr1i2	5	0.90689	0.90726	1	15161	0	0.36078	0.016139	0.053726	0.537023	1811	4	0.36078
Slc16a10	5	0.058575	0.1571	0.908396	3125	1	0.47278	0.016156	0.053766	0.537023	1812	4	0.47278
Enpp6	5	0.71271	0.76771	1	12336	1	0.35014	0.016158	0.053772	0.537023	1813	4	0.35014
Tbce	5	0.82036	0.83087	1	13585	1	0.37662	0.016158	0.053775	0.537023	1814	3	0.37662
Iscu	5	0.32403	0.49599	1	7809	2	-0.036475	0.016164	0.053787	0.537023	1815	2	-0.036475
Zfp710	5	0.9788	0.97893	1	16969	0	0.49535	0.016176	0.053821	0.537023	1816	3	0.49535
Spag7	5	0.9703	0.97041	1	16681	0	0.58593	0.016179	0.053831	0.537023	1817	4	0.58593
Taar7e	3	0.96514	0.96536	1	16536	0	0.79553	0.016189	0.042267	0.474086	1818	3	0.79553
Il12rb2	5	0.95042	0.95066	1	16136	0	0.70361	0.016225	0.053968	0.537983	1819	4	0.70361
Nkapl	5	0.69831	0.76077	1	12203	1	0.375	0.016239	0.054008	0.537983	1820	4	0.375
Plekhf1	5	0.24673	0.43214	1	6868	1	0.44684	0.01624	0.054015	0.537983	1821	3	0.44684
Zfp800	5	0.98958	0.98966	1	17401	0	0.63803	0.016263	0.054072	0.538265	1822	4	0.63803
H60b	5	0.85643	0.85873	1	14178	1	0.68279	0.016285	0.054139	0.538494	1823	3	0.68279
Rps25	3	0.10978	0.1946	0.981713	4190	1	1.3271	0.016327	0.042617	0.474885	1824	2	1.3271
Prmt10	5	0.93271	0.933	1	15690	0	0.64589	0.016329	0.054252	0.539184	1825	3	0.64589
Pik3cg	5	0.97148	0.97159	1	16716	0	0.39087	0.016363	0.054345	0.539818	1826	4	0.39087
Capn12	5	0.98672	0.98678	1	17265	0	0.47824	0.016386	0.054413	0.540194	1827	4	0.47824
Nova2	5	0.98375	0.98386	1	17147	0	0.38929	0.01642	0.054508	0.540848	1828	4	0.38929
Tmem179b	5	0.329	0.5002	1	7878	1	0.55628	0.016436	0.05456	0.540975	1829	4	0.55628
Pmpcb	5	0.57936	0.71186	1	11251	1	1.6077	0.016445	0.054591	0.540975	1830	4	1.6077
Dpp6	5	0.16231	0.31983	1	5302	1	0.082658	0.016462	0.054633	0.540975	1831	2	0.082658
Hist4h4	4	0.91406	0.91417	1	15307	0	0.52119	0.01647	0.05338	0.535428	1832	3	0.52119
Klkb1	5	0.85948	0.86133	1	14232	1	0.59008	0.016474	0.054666	0.540975	1833	3	0.59008
Fnip1	5	0.99374	0.99375	1	17589	0	0.55702	0.016474	0.054668	0.540975	1834	4	0.55702
Egr4	5	0.90761	0.90797	1	15178	0	0.41706	0.016518	0.054784	0.541833	1835	4	0.41706
Catsperg1	5	0.82859	0.83678	1	13720	1	0.36289	0.016561	0.054911	0.542745	1836	4	0.36289
Mecr	5	0.97875	0.97887	1	16967	0	0.49489	0.016571	0.054935	0.542745	1837	4	0.49489
Wdr74	5	0.68226	0.75336	1	12057	1	0.52394	0.016615	0.055052	0.543564	1838	4	0.52394
Prima1	5	0.2953	0.47217	1	7446	2	0.51799	0.016623	0.055077	0.543564	1839	3	0.51799
Nanos1	5	0.91648	0.91678	1	15354	0	0.49876	0.016668	0.05521	0.544589	1840	4	0.49876
Adat1	5	0.99065	0.99071	1	17442	0	0.31349	0.016717	0.055347	0.545639	1841	4	0.31349
Coro1c	5	0.55008	0.69146	1	10876	1	0.38937	0.016756	0.055448	0.546343	1842	4	0.38937
Rpl23	3	0.97976	0.97991	1	17002	0	1.5494	0.016773	0.043711	0.481472	1843	3	1.5494
D10Bwg1379e	5	0.70304	0.76299	1	12240	1	0.36962	0.016786	0.055534	0.546622	1844	4	0.36962
Otof	5	0.96066	0.96083	1	16417	0	0.50186	0.016787	0.055535	0.546622	1845	4	0.50186
AY761184	1	0.98313	0.98322	1	17124	0	1.4227	0.016873	0.0168	0.271716	1846	1	1.4227
Papss2	5	0.98882	0.98889	1	17355	0	0.18001	0.016897	0.055838	0.548834	1847	3	0.18001
Scyl1	5	0.80765	0.822	1	13396	1	0.35	0.016901	0.055849	0.548834	1848	4	0.35
Yif1a	5	0.94873	0.949	1	16095	0	0.53128	0.016959	0.056007	0.549795	1849	4	0.53128
Cct5	3	0.98304	0.98319	1	17116	0	0.84782	0.016964	0.044171	0.484229	1850	3	0.84782
Rtn4r	5	0.97594	0.97611	1	16850	0	0.45613	0.016988	0.056093	0.550341	1851	4	0.45613
Zfp644	5	0.97563	0.97578	1	16840	0	0.54843	0.017007	0.056144	0.550555	1852	3	0.54843
Rfc3	5	0.96342	0.96362	1	16493	0	0.43555	0.017044	0.056248	0.551279	1853	3	0.43555
Ccdc11	5	0.95652	0.95677	1	16312	0	0.58579	0.017136	0.056486	0.553052	1854	3	0.58579
Napg	5	0.94959	0.94983	1	16119	0	0.31409	0.017138	0.056489	0.553052	1855	4	0.31409
Gimap8	5	0.88839	0.88886	1	14797	0	0.40319	0.017203	0.05669	0.554721	1856	4	0.40319
Gid4	5	0.8563	0.85862	1	14176	1	0.34131	0.017279	0.056889	0.556373	1857	4	0.34131
Hsdl1	5	0.98957	0.98965	1	17400	0	0.51209	0.017341	0.057077	0.557918	1858	4	0.51209
St3gal5	5	0.97292	0.97301	1	16759	0	0.53309	0.017386	0.057204	0.558862	1859	4	0.53309
Ccdc61	5	0.93493	0.9352	1	15736	0	0.43004	0.017431	0.057314	0.559346	1860	3	0.43004
Ssbp1	5	0.69863	0.76091	1	12206	1	0.7468	0.017447	0.057355	0.559448	1861	3	0.7468
Sct	5	0.76913	0.79779	1	12915	1	0.74016	0.017459	0.057398	0.559566	1862	4	0.74016
Pink1	4	0.97202	0.97222	1	16733	0	0.64219	0.017476	0.055721	0.548156	1863	3	0.64219
Ddx19a	5	0.97801	0.97815	1	16934	0	0.59876	0.017503	0.057516	0.560423	1864	4	0.59876
Mlycd	5	0.97693	0.97707	1	16900	0	0.34454	0.017548	0.05765	0.561022	1865	4	0.34454
Sec61b	4	0.68649	0.71257	1	12090	1	0.31891	0.017567	0.055913	0.549169	1866	2	0.31891
Pdxk	5	0.90885	0.90924	1	15196	0	0.45886	0.017569	0.057704	0.561022	1867	4	0.45886
Mif	2	0.98243	0.98249	1	17094	0	0.67629	0.01757	0.032592	0.403149	1868	2	0.67629
Clock	5	0.97273	0.97282	1	16753	0	0.62529	0.017582	0.057735	0.561022	1869	4	0.62529
Lipn	5	0.98651	0.98659	1	17254	0	0.62099	0.017599	0.05778	0.561022	1870	4	0.62099
Nsl1	5	0.9893	0.98938	1	17386	0	0.87409	0.017605	0.057791	0.561022	1871	4	0.87409
Esco1	5	0.98943	0.98952	1	17393	0	0.42702	0.017628	0.057847	0.561269	1872	4	0.42702
D7Ertd443e	5	0.95357	0.95382	1	16221	0	0.41154	0.017642	0.05789	0.561391	1873	4	0.41154
Ppp2r2a	5	0.9446	0.94485	1	15995	0	0.63193	0.017667	0.057959	0.561765	1874	3	0.63193
Dtx2	5	0.83761	0.84362	1	13861	1	0.53378	0.01768	0.057994	0.561806	1875	3	0.53378
Tango2	5	0.74947	0.78666	1	12706	1	0.63372	0.017722	0.058103	0.562573	1876	4	0.63372
Tnnt1	5	0.98834	0.9884	1	17333	0	0.49172	0.017745	0.058165	0.56287	1877	4	0.49172
Atp6v1g1	3	0.97182	0.97203	1	16727	0	1.1474	0.017751	0.046162	0.496538	1878	3	1.1474
Terf2	5	0.81198	0.825	1	13448	1	0.49571	0.017769	0.058241	0.563308	1879	4	0.49571
Rcn3	5	0.085995	0.20183	0.993799	3692	1	0.55621	0.017808	0.058345	0.564026	1880	3	0.55621
Naaa	5	0.96846	0.96862	1	16629	0	0.27196	0.017883	0.058553	0.565736	1881	4	0.27196
Irak4	5	0.51787	0.66253	1	10390	2	0.46044	0.017941	0.05873	0.566945	1882	3	0.46044
Zfp784	5	0.99371	0.99372	1	17585	0	0.45066	0.017944	0.05874	0.566945	1883	4	0.45066
Mcph1	5	0.93994	0.94017	1	15858	0	0.50214	0.017972	0.058816	0.567384	1884	4	0.50214
Ap1g1	5	0.91505	0.91534	1	15324	0	0.012441	0.017989	0.058859	0.567502	1885	2	0.012441
Prpf31	5	0.99242	0.9925	1	17520	0	0.60402	0.018005	0.058897	0.567573	1886	4	0.60402
Fads3	5	0.88121	0.88168	1	14641	1	0.42721	0.018037	0.058987	0.568041	1887	3	0.42721
Tspan33	5	0.46367	0.61495	1	9624	1	0.58549	0.018044	0.059008	0.568041	1888	3	0.58549
Tbc1d12	5	0.94088	0.94114	1	15887	0	0.40947	0.01806	0.059049	0.568142	1889	4	0.40947
Adamtsl5	5	0.98353	0.98364	1	17137	0	0.37118	0.018084	0.059121	0.568539	1890	4	0.37118
Plac1l	5	0.90613	0.9065	1	15149	0	0.20498	0.018143	0.059273	0.569403	1891	3	0.20498
Thoc1	5	0.30557	0.48064	1	7581	1	0.79707	0.018143	0.059273	0.569403	1892	4	0.79707
Msr1	5	0.89694	0.89736	1	14952	0	0.42447	0.018182	0.059382	0.570154	1893	4	0.42447
Mrpl40	5	0.89606	0.89653	1	14939	0	0.60715	0.018286	0.059665	0.572025	1894	3	0.60715
Nyap2	5	0.96776	0.96794	1	16603	0	0.70422	0.018296	0.059693	0.572025	1895	4	0.70422
Trhde	5	0.83523	0.84179	1	13826	1	0.53481	0.018308	0.059723	0.572025	1896	4	0.53481
Slc25a14	5	0.27394	0.45458	1	7204	2	0.23709	0.01832	0.059759	0.572025	1897	3	0.23709
Ywhaz	5	0.95447	0.95473	1	16253	0	0.45578	0.018321	0.059763	0.572025	1898	4	0.45578
Ctsd	5	0.98763	0.98768	1	17307	0	0.51192	0.018321	0.059763	0.572025	1899	4	0.51192
Mup6	3	0.98168	0.98185	1	17071	0	0.70057	0.018324	0.047508	0.504	1900	3	0.70057
Sdccag8	5	0.93916	0.93941	1	15838	0	0.56789	0.018343	0.059817	0.572243	1901	4	0.56789
Hip1	5	0.45712	0.60939	1	9527	1	0.4023	0.018372	0.059896	0.572696	1902	4	0.4023
Ppp6c	4	0.43427	0.58054	1	9222	1	0.34967	0.018405	0.057667	0.561022	1903	2	0.34967
Gabrb1	5	0.76939	0.79795	1	12917	1	0.31705	0.018421	0.06002	0.573407	1904	4	0.31705
Oca2	5	0.9884	0.98846	1	17338	0	0.37498	0.018425	0.060032	0.573407	1905	4	0.37498
Fxyd1	5	0.83169	0.83912	1	13759	1	0.52464	0.018468	0.060151	0.574239	1906	4	0.52464
Ntf5	5	0.64016	0.73529	1	11699	1	0.27349	0.018486	0.060203	0.57444	1907	3	0.27349
Nfs1	5	0.38598	0.54822	1	8604	1	1.0054	0.018506	0.060253	0.574624	1908	3	1.0054
Stoml2	5	0.99301	0.99305	1	17551	0	0.43884	0.018525	0.060312	0.574886	1909	4	0.43884
Asphd2	5	0.36846	0.53328	1	8368	1	0.39547	0.01854	0.060353	0.574983	1910	4	0.39547
P4hb	5	0.29446	0.47146	1	7435	1	0.65561	0.018633	0.060621	0.577231	1911	3	0.65561
Raet1d	5	0.2865	0.46486	1	7341	1	0.54955	0.018671	0.060706	0.577746	1912	3	0.54955
Tm2d1	5	0.2033	0.37933	1	6129	1	0.37725	0.018732	0.060874	0.579044	1913	4	0.37725
Ttc9b	5	0.22163	0.4051	1	6498	1	0.57302	0.018768	0.060971	0.579366	1914	3	0.57302
Sytl2	7	0.99341	0.99341	1	17571	0	0.36119	0.018777	0.070514	0.623384	1915	5	0.36119
Rps6ka4	5	0.94466	0.94491	1	15996	0	0.42497	0.018785	0.061016	0.579491	1916	4	0.42497
Dhx32	5	0.95564	0.95589	1	16285	0	0.4426	0.01882	0.061103	0.58002	1917	4	0.4426
Dnase1	5	0.99245	0.99252	1	17522	0	0.52939	0.018865	0.061215	0.580787	1918	4	0.52939
Aldoa	5	0.85073	0.854	1	14086	1	0.31808	0.018914	0.061353	0.581195	1919	3	0.31808
A730017C20Rik	5	0.26297	0.44545	1	7050	2	-0.13417	0.018914	0.061353	0.581195	1920	2	-0.13417
Gucd1	5	0.86013	0.86192	1	14239	1	0.03135	0.018914	0.061353	0.581195	1921	2	0.03135
Hlcs	5	0.66958	0.74761	1	11960	1	0.34491	0.018944	0.061432	0.581347	1922	4	0.34491
Cmpk2	5	0.97917	0.9793	1	16982	0	0.37162	0.01895	0.061447	0.581347	1923	4	0.37162
Hsd17b11	5	0.78428	0.80696	1	13102	1	0.29737	0.018958	0.061464	0.581347	1924	4	0.29737
M6pr	5	0.97306	0.97315	1	16764	0	0.72931	0.01897	0.061498	0.581369	1925	4	0.72931
Sgce	5	0.94326	0.94352	1	15961	0	0.3237	0.018985	0.061548	0.581548	1926	4	0.3237
Rpa3	5	0.95741	0.95764	1	16334	0	0.45072	0.019024	0.061651	0.582225	1927	2	0.45072
Plaa	5	0.86604	0.86724	1	14348	1	0.12285	0.019041	0.061705	0.582435	1928	2	0.12285
Set	3	0.98096	0.98111	1	17043	0	0.65694	0.019042	0.04927	0.514198	1929	3	0.65694
Gpr123	5	0.18591	0.35428	1	5757	2	0.51475	0.019163	0.062029	0.585186	1930	3	0.51475
Ybx2	5	0.4386	0.59333	1	9283	1	0.25227	0.019216	0.062173	0.586251	1931	4	0.25227
Pde3b	5	0.99143	0.9915	1	17476	0	0.28815	0.01926	0.062298	0.587122	1932	4	0.28815
AW549877	5	0.27014	0.45137	1	7144	1	0.74323	0.019275	0.062343	0.587247	1933	3	0.74323
Lman2	5	0.96822	0.96839	1	16623	0	0.52145	0.019342	0.062537	0.588173	1934	4	0.52145
Wdr45b	5	0.41772	0.57538	1	8994	2	0.70546	0.019426	0.062744	0.589819	1935	3	0.70546
4933411K16Rik	5	0.79625	0.81443	1	13255	1	0.50415	0.019473	0.062876	0.590518	1936	3	0.50415
Nipal3	5	0.55069	0.692	1	10886	1	0.33195	0.019484	0.062903	0.590518	1937	4	0.33195
Usp47	5	0.96806	0.96823	1	16617	0	0.47288	0.019489	0.062915	0.590518	1938	4	0.47288
Comt	5	0.98917	0.98923	1	17379	0	0.31188	0.019529	0.063025	0.591251	1939	4	0.31188
Sfpq	5	0.92462	0.92495	1	15509	0	0.36004	0.019544	0.06306	0.591278	1940	4	0.36004
Mak16	5	0.98913	0.9892	1	17375	0	0.72517	0.019636	0.063302	0.593245	1941	4	0.72517
l7Rn6	5	0.95047	0.9507	1	16137	0	0.62446	0.019668	0.063386	0.593332	1942	3	0.62446
Moxd2	5	0.9765	0.97664	1	16883	0	0.25995	0.019676	0.063408	0.593332	1943	4	0.25995
Cnfn	5	0.8195	0.83027	1	13562	1	0.50328	0.019732	0.063558	0.594132	1944	4	0.50328
Dnajb9	5	0.59414	0.71726	1	11347	1	0.63042	0.019747	0.063605	0.594268	1945	4	0.63042
Retn	5	0.65878	0.74298	1	11852	1	0.43547	0.019803	0.063764	0.595025	1946	4	0.43547
Polr2a	5	0.78812	0.80932	1	13148	1	0.84381	0.019809	0.063783	0.595025	1947	3	0.84381
Gtf2a1	5	0.97958	0.97971	1	16995	0	0.42322	0.019848	0.063887	0.595697	1948	4	0.42322
Map6	5	0.85577	0.85818	1	14166	1	0.39025	0.019905	0.064045	0.596864	1949	3	0.39025
Hapln4	5	0.75537	0.78988	1	12765	1	0.45204	0.019919	0.064082	0.596908	1950	3	0.45204
Scoc	8	0.035785	0.12341	0.848131	2380	5	-0.5878	0.019978	0.079268	0.663981	1951	3	-0.5878
Fxyd5	5	0.94733	0.94759	1	16060	0	0.51136	0.019978	0.06423	0.597816	1952	3	0.51136
Naa40	5	0.20702	0.38462	1	6211	1	0.36368	0.019983	0.064244	0.597816	1953	4	0.36368
Dtymk	7	0.99746	0.99743	1	17842	0	0.82932	0.019997	0.074094	0.639254	1954	5	0.82932
Cts7	5	0.81145	0.82462	1	13442	1	0.73886	0.020013	0.064333	0.598337	1955	4	0.73886
Chfr	5	0.98734	0.98738	1	17291	0	0.37885	0.020024	0.064365	0.598337	1956	4	0.37885
Fas	6	0.87006	0.88105	1	14427	1	0.46808	0.020069	0.072577	0.632807	1957	4	0.46808
Zfp868	5	0.89964	0.90005	1	15006	0	-0.15734	0.020096	0.064564	0.599275	1958	1	-0.15734
Gnrh1	5	0.19635	0.36936	1	5983	2	-0.14081	0.020096	0.064564	0.599275	1959	1	-0.14081
Rbx1	5	0.98313	0.98322	1	17123	0	0.73558	0.020096	0.064564	0.599275	1960	4	0.73558
Pard6a	5	0.7588	0.79182	1	12815	1	0.24937	0.020118	0.064615	0.599452	1961	4	0.24937
Atp2c2	5	0.96017	0.96035	1	16406	0	0.38443	0.020152	0.064701	0.599634	1962	4	0.38443
Tns1	5	0.99372	0.99373	1	17587	0	0.40633	0.020181	0.064785	0.599634	1963	4	0.40633
Kif4	5	0.59513	0.71764	1	11355	1	0.87099	0.020184	0.064794	0.599634	1964	4	0.87099
Vmn1r60	2	0.97981	0.97988	1	17006	0	0.7652	0.020186	0.037326	0.437716	1965	2	0.7652
Svopl	5	0.95007	0.95031	1	16127	0	0.85115	0.020247	0.064952	0.599918	1966	3	0.85115
Serpinb1b	5	0.86194	0.86351	1	14269	1	0.5757	0.020247	0.064952	0.599918	1967	3	0.5757
Sycn	5	0.93924	0.93949	1	15841	0	0.19895	0.020266	0.064996	0.599918	1968	3	0.19895
AU021092	5	0.61977	0.72711	1	11529	1	0.32826	0.020278	0.065024	0.599918	1969	4	0.32826
Vmn1r64	3	0.9797	0.97986	1	16999	0	0.48168	0.020296	0.052317	0.528806	1970	3	0.48168
Ccdc172	5	0.79014	0.81056	1	13175	1	0.37533	0.020366	0.065271	0.601644	1971	4	0.37533
Ric3	5	0.95588	0.95615	1	16292	0	0.5054	0.020379	0.065309	0.601644	1972	4	0.5054
Tlx1	5	0.56452	0.70461	1	11114	1	0.37996	0.020403	0.065378	0.601676	1973	4	0.37996
Mms22l	5	0.95751	0.95773	1	16335	0	0.43756	0.020403	0.065378	0.601676	1974	3	0.43756
Nampt	5	0.98908	0.98916	1	17369	0	0.41317	0.020427	0.065434	0.601749	1975	4	0.41317
Wfs1	5	0.92852	0.92885	1	15602	0	0.46359	0.02044	0.065463	0.601749	1976	3	0.46359
Ufm1	5	0.89156	0.89202	1	14857	0	0.47346	0.020458	0.06551	0.601749	1977	3	0.47346
Gtf2a2	5	0.94731	0.94757	1	16059	0	0.80421	0.020461	0.065517	0.601749	1978	4	0.80421
Mfsd11	5	0.82637	0.83516	1	13692	1	0.33097	0.02048	0.06557	0.601933	1979	4	0.33097
2010001E11Rik	3	0.97951	0.97968	1	16993	0	0.29914	0.020493	0.052808	0.532087	1980	3	0.29914
Gcsam	5	0.90898	0.90937	1	15198	0	0.40851	0.020504	0.065634	0.602226	1981	4	0.40851
Dpcd	5	0.96475	0.96496	1	16522	0	0.26005	0.020541	0.065738	0.60242	1982	3	0.26005
Mis12	5	0.43478	0.59002	1	9229	2	1.1022	0.020596	0.065878	0.60242	1983	3	1.1022
Zbtb32	5	0.98287	0.98296	1	17110	0	0.56347	0.020598	0.065884	0.60242	1984	3	0.56347
Fancd2	5	0.62623	0.72961	1	11582	1	0.64765	0.020619	0.065944	0.60242	1985	3	0.64765
Ccne2	5	0.99039	0.99044	1	17433	0	1.3911	0.020622	0.06595	0.60242	1986	4	1.3911
Agr3	5	0.72152	0.77206	1	12421	1	0.70654	0.020622	0.06595	0.60242	1987	4	0.70654
Gnl3	4	0.24961	0.38883	1	6902	1	0.78209	0.020626	0.062376	0.587255	1988	2	0.78209
Vmn1r183	4	0.77647	0.77968	1	13004	1	0.51829	0.020672	0.062456	0.587714	1989	3	0.51829
Taf9	8	0.97979	0.97982	1	17003	0	0.76446	0.020687	0.081674	0.671591	1990	6	0.76446
Ldhc	5	0.7589	0.79188	1	12816	1	0.53663	0.020701	0.066158	0.602885	1991	3	0.53663
Syt9	5	0.99367	0.99368	1	17581	0	0.31093	0.020704	0.066165	0.602885	1992	4	0.31093
Map3k11	5	0.98332	0.98342	1	17130	0	0.33955	0.020716	0.066203	0.602934	1993	3	0.33955
Zfp941	5	0.99111	0.99118	1	17464	0	0.44384	0.020768	0.066345	0.603933	1994	4	0.44384
Lsm2	12	0.37416	0.66635	1	8443	2	0.40456	0.020779	0.094087	0.72046	1995	8	0.40456
Upf3b	5	0.82814	0.83646	1	13714	1	0.56286	0.020807	0.066455	0.604286	1996	3	0.56286
Ccdc28a	5	0.85784	0.85992	1	14198	1	0.47257	0.020812	0.066468	0.604286	1997	4	0.47257
Tfg	5	0.9168	0.9171	1	15362	0	0.45999	0.020817	0.066483	0.604286	1998	4	0.45999
[truncated: 16,408 more rows]

## Sheet: Table3 IFNγ-Nucleolomics
Supplementary Table 3, nucleolomics-targeted CRISPR screen data under IFNγ treatment
id	num	neg|score	neg|p-value	neg|fdr	neg|rank	neg|goodsgrna	neg|lfc	pos|score	pos|p-value	pos|fdr	pos|rank	pos|goodsgrna	pos|lfc
Stub1	6	1	1	0.999995	728	0	1.1083	1.4018e-08	4.9411e-06	0.003597	1	6	1.1083
Traf3	6	0.24888	0.44998	0.999995	276	1	0.98728	5.2593e-06	1.4823e-05	0.005396	2	5	0.98728
Ssb	6	0.99431	0.99417	0.999995	716	0	1.0424	1.6754e-05	0.00012353	0.029976	3	5	1.0424
Hnrnpll	6	0.99919	0.99908	0.999995	727	0	0.24344	0.00080659	0.0041258	0.501799	4	6	0.24344
Nudt16l1	6	0.99919	0.99907	0.999995	726	0	0.34184	0.0008106	0.0041357	0.501799	5	6	0.34184
Rpl11	5	0.16542	0.32698	0.999995	212	3	-0.45649	0.00083359	0.0040072	0.501799	6	2	-0.45649
Tpr	6	0.99891	0.99884	0.999995	725	0	0.55437	0.0010941	0.0054994	0.503147	7	6	0.55437
Cbx3	6	0.95589	0.95523	0.999995	680	0	0.56369	0.0010998	0.0055291	0.503147	8	4	0.56369
susd6	6	0.96172	0.96165	0.999995	683	0	0.4877	0.0013248	0.0065766	0.531974	9	5	0.4877
Trim28	6	0.93881	0.93774	0.999995	665	0	0.53564	0.0016224	0.0080293	0.584532	10	5	0.53564
Bzw2	6	0.99819	0.99816	0.999995	724	0	0.24029	0.0018078	0.008889	0.586588	11	6	0.24029
Upf3b	6	0.99804	0.99796	0.999995	723	0	0.53356	0.0019621	0.0097982	0.586588	12	6	0.53356
Eloa	6	0.98618	0.9861	0.999995	711	0	0.63703	0.002212	0.010964	0.586588	13	5	0.63703
Snrnp70	6	0.31125	0.5208	0.999995	326	3	-0.098614	0.00227	0.011281	0.586588	14	2	-0.098614
Lrp10	6	0.9975	0.99744	0.999995	722	0	0.28967	0.0025026	0.012407	0.595324	15	6	0.28967
Gcn1	6	0.89891	0.90406	0.999995	642	1	0.37875	0.0029378	0.014453	0.595324	16	5	0.37875
Zfp638	6	0.90288	0.90673	0.999995	644	1	0.63379	0.003157	0.015214	0.595324	17	4	0.63379
Polr2h	6	0.32537	0.53675	0.999995	334	2	0.757	0.0034689	0.016241	0.595324	18	4	0.757
Ring1	6	0.99475	0.99466	0.999995	717	0	0.31435	0.0035802	0.016706	0.595324	19	5	0.31435
Smc2	6	0.2005	0.39158	0.999995	236	2	0.27418	0.0039408	0.017991	0.595324	20	3	0.27418
Cdk13	6	0.37404	0.59077	0.999995	375	1	0.36654	0.0042758	0.019206	0.607914	21	5	0.36654
Otud4	4	0.99551	0.99549	0.999995	719	0	0.50888	0.0044929	0.01553	0.595324	22	4	0.50888
Nip7	6	0.1653	0.35	0.999995	211	2	0.29485	0.00529	0.022685	0.626271	23	3	0.29485
Dnaja1	6	0.25956	0.46281	0.999995	285	1	0.43466	0.0057263	0.024365	0.626271	24	5	0.43466
Slc35a2	6	0.99557	0.99539	0.999995	720	0	0.34548	0.0058089	0.024671	0.626271	25	5	0.34548
Srsf5	6	0.9807	0.98011	0.999995	702	0	0.45599	0.0058981	0.024948	0.626271	26	4	0.45599
Ugcg	6	0.80763	0.8571	0.999995	608	1	0.43473	0.0065854	0.027359	0.648062	27	5	0.43473
Sap18	6	0.86342	0.88309	0.999995	631	1	0.51034	0.0066715	0.027596	0.648062	28	4	0.51034
Rpl35a	6	0.0678	0.18219	0.999995	106	2	0.26499	0.0075239	0.030679	0.658591	29	3	0.26499
Fbl	6	0.44634	0.64124	0.999995	420	2	0.35621	0.00755	0.030758	0.658591	30	3	0.35621
Exosc10	6	0.4926	0.6704	0.999995	440	1	0.18978	0.00755	0.030758	0.658591	31	3	0.18978
Ezh2	6	0.57429	0.72564	0.999995	493	1	0.5372	0.0079663	0.032092	0.667523	32	4	0.5372
Zfp326	6	0.95441	0.95381	0.999995	678	0	0.33212	0.0092118	0.035927	0.709696	33	5	0.33212
Wdr43	6	0.51374	0.68409	0.999995	449	1	0.23619	0.0093253	0.036292	0.709696	34	5	0.23619
Rpl38	6	0.0033805	0.0155	0.540663	19	4	-0.77883	0.0098057	0.037824	0.709696	35	1	-0.77883
Eftud2	6	0.044809	0.13363	0.999995	78	3	-0.097567	0.010458	0.040186	0.709696	36	2	-0.097567
Rrp1b	6	0.67847	0.80066	0.999995	559	1	0.27639	0.010858	0.041253	0.709696	37	5	0.27639
Eef1g	6	0.89846	0.90383	0.999995	641	1	0.52002	0.010933	0.041471	0.709696	38	4	0.52002
Ifi204	6	0.13384	0.30972	0.999995	182	2	0.4894	0.011021	0.041836	0.709696	39	4	0.4894
Rpl14	6	0.43663	0.63548	0.999995	413	2	0.14756	0.011307	0.042706	0.709696	40	2	0.14756
Spty2d1	6	0.96938	0.96935	0.999995	690	0	0.32524	0.011405	0.042894	0.709696	41	4	0.32524
Ftsj3	6	0.52613	0.69218	0.999995	462	2	0.064544	0.012807	0.047993	0.776419	42	2	0.064544
Rps7	6	0.075393	0.19802	0.999995	116	2	0.49815	0.013472	0.050246	0.77828	43	3	0.49815
Rpl13	5	0.19398	0.36806	0.999995	230	2	0.51761	0.014334	0.050167	0.77828	44	3	0.51761
Snrnp200	5	0.059741	0.16533	0.999995	102	2	-0.35628	0.01568	0.053902	0.813008	45	1	-0.35628
Rfc2	6	0.41527	0.6221	0.999995	400	2	0.53584	0.01637	0.05998	0.813008	46	4	0.53584
Srsf7	6	0.6653	0.79148	0.999995	543	1	0.44404	0.016598	0.060612	0.813008	47	4	0.44404
Ncapd3	6	0.66711	0.7927	0.999995	544	2	0.54355	0.01668	0.060869	0.813008	48	4	0.54355
Xrcc5	6	0.97912	0.97866	0.999995	700	0	0.27958	0.017024	0.062045	0.813008	49	3	0.27958
NCsgRNA_14	1	0.9822	0.98225	0.999995	705	0	0.79639	0.017799	0.017931	0.595324	50	1	0.79639
Ddx50	6	0.86514	0.88403	0.999995	632	1	0.57391	0.017961	0.065218	0.813008	51	4	0.57391
Grwd1	6	0.95711	0.9564	0.999995	681	0	0.37266	0.018031	0.065405	0.813008	52	5	0.37266
Polr2l	5	0.64635	0.75553	0.999995	532	1	0.15442	0.01817	0.060583	0.813008	53	3	0.15442
H2bc12	6	0.79543	0.85261	0.999995	602	1	0.43803	0.018441	0.06669	0.813008	54	3	0.43803
Fam136a	5	0.48663	0.6409	0.999995	435	1	0.38496	0.018536	0.061522	0.813008	55	4	0.38496
Trmt6	6	0.33862	0.55167	0.999995	348	2	0.40075	0.018751	0.067688	0.813008	56	4	0.40075
Cdkn2aip	6	0.93298	0.93145	0.999995	663	1	0.21037	0.01919	0.069012	0.813008	57	5	0.21037
Rrs1	6	0.76185	0.84114	0.999995	592	1	0.26109	0.019256	0.06924	0.813008	58	5	0.26109
Nle1	6	0.38219	0.59959	0.999995	382	1	-0.071009	0.020276	0.072609	0.814094	59	2	-0.071009
Mcm4	6	0.617	0.75577	0.999995	517	1	0.43311	0.020464	0.073173	0.814094	60	4	0.43311
NCsgRNA_23	1	0.97917	0.97923	0.999995	701	0	0.7601	0.020828	0.020975	0.626271	61	1	0.7601
Rpl23a	5	0.45632	0.61679	0.999995	425	2	-0.030942	0.021195	0.068834	0.813008	62	2	-0.030942
Ilf2	6	0.96681	0.96681	0.999995	686	0	0.25641	0.023081	0.081691	0.866385	63	5	0.25641
Cdk1	6	0.9833	0.98305	0.999995	707	0	0.49548	0.023157	0.081869	0.866385	64	5	0.49548
Rbx1	6	0.34265	0.55595	0.999995	353	2	-0.022835	0.02325	0.082116	0.866385	65	2	-0.022835
NCsgRNA_35	1	0.97639	0.97655	0.999995	698	0	0.79783	0.023605	0.023683	0.626271	66	1	0.79783
Polr1d	6	0.96518	0.96535	0.999995	685	0	0.30633	0.025826	0.09017	0.878248	67	4	0.30633
Dhx9	6	0.53813	0.70042	0.999995	470	1	0.39233	0.025973	0.090546	0.878248	68	4	0.39233
Nsmce1	6	0.11583	0.27668	0.999995	164	4	-0.21414	0.026217	0.091366	0.878248	69	2	-0.21414
Rbis	6	0.99082	0.99095	0.999995	714	0	0.22104	0.026265	0.091475	0.878248	70	5	0.22104
Smc4	6	0.23776	0.437	0.999995	265	3	0.20633	0.026699	0.093016	0.878248	71	3	0.20633
Manf	6	0.95555	0.95481	0.999995	679	0	0.26722	0.027196	0.094538	0.878248	72	5	0.26722
Hnrnpa1	6	0.70596	0.82166	0.999995	578	2	-0.0021846	0.027698	0.095912	0.878248	73	3	-0.0021846
Ncl	6	0.59024	0.73686	0.999995	502	2	0.28756	0.028418	0.098175	0.878248	74	3	0.28756
Xrn2	6	0.99016	0.99022	0.999995	713	0	0.30647	0.028565	0.09859	0.878248	75	4	0.30647
Chd4	6	0.36715	0.58269	0.999995	368	2	0.45856	0.029394	0.10098	0.878248	76	4	0.45856
Cutc	6	0.99676	0.99669	0.999995	721	0	0.30794	0.029768	0.10234	0.878248	77	5	0.30794
Cmss1	6	0.6929	0.81146	0.999995	570	1	0.30186	0.029835	0.10254	0.878248	78	3	0.30186
Nifk	6	0.994	0.99394	0.999995	715	0	0.31596	0.030654	0.10489	0.887745	79	4	0.31596
Hnrnpf	6	0.14547	0.32547	0.999995	193	2	0.32944	0.031081	0.10609	0.887745	80	4	0.32944
Rpl23	5	0.98221	0.9827	0.999995	706	0	0.7567	0.032273	0.097443	0.878248	81	3	0.7567
Rps15a	5	0.15091	0.30624	0.999995	200	2	0.11421	0.033007	0.099222	0.878248	82	2	0.11421
Sfpq	5	0.17932	0.34683	0.999995	220	2	-0.16246	0.033355	0.10014	0.878248	83	2	-0.16246
Ddx47	6	0.65586	0.78421	0.999995	537	2	0.6834	0.033651	0.11225	0.918155	84	4	0.6834
Atrx	6	0.86198	0.88232	0.999995	629	1	0.20517	0.035073	0.11513	0.927555	85	4	0.20517
Hmgn1	6	0.95229	0.95175	0.999995	675	0	0.28434	0.035743	0.11651	0.927555	86	4	0.28434
Rpl31	6	0.43542	0.63463	0.999995	412	2	0.1637	0.036543	0.11819	0.927555	87	3	0.1637
Phf6	6	0.93153	0.93004	0.999995	662	1	0.24665	0.036708	0.11849	0.927555	88	3	0.24665
Kdm3b	6	0.92669	0.9256	0.999995	658	1	0.41881	0.038032	0.12143	0.931304	89	4	0.41881
Plrg1	6	0.94623	0.94547	0.999995	671	0	0.33774	0.04008	0.12579	0.931304	90	4	0.33774
Tma16	6	0.94421	0.94328	0.999995	670	0	0.051239	0.041671	0.12928	0.931304	91	2	0.051239
Snw1	6	0.3776	0.59459	0.999995	379	3	-0.1275	0.041671	0.12928	0.931304	92	2	-0.1275
Ilf3	6	0.39559	0.61047	0.999995	386	2	0.29116	0.0422	0.13043	0.931304	93	4	0.29116
Nudt21	6	0.0076091	0.030531	0.724646	28	3	-0.2998	0.044109	0.13475	0.931304	94	3	-0.2998
Utp4	6	0.60679	0.74829	0.999995	514	2	0.24635	0.044328	0.13524	0.931304	95	3	0.24635
Rpl37	6	0.80337	0.85547	0.999995	605	1	0.06784	0.04532	0.13741	0.931304	96	2	0.06784
H1f3	6	0.96462	0.96476	0.999995	684	0	0.29497	0.046047	0.13924	0.931304	97	4	0.29497
Eif4a3	5	0.80427	0.82738	0.999995	606	1	0.33187	0.046167	0.13298	0.931304	98	4	0.33187
Ccnb1	6	0.049684	0.14451	0.999995	88	2	0.38816	0.046352	0.13993	0.931304	99	4	0.38816
Surf6	6	0.65106	0.78062	0.999995	534	1	0.40535	0.046505	0.14021	0.931304	100	4	0.40535
Rps16	6	0.088215	0.22299	0.999995	133	1	0.14626	0.046777	0.14092	0.931304	101	1	0.14626
Elavl1	6	0.87267	0.88834	0.999995	633	1	0.27703	0.047741	0.14311	0.931304	102	4	0.27703
Utp11	6	0.34545	0.5589	0.999995	356	2	0.11167	0.048231	0.14409	0.931304	103	2	0.11167
Nol10	6	0.67014	0.79468	0.999995	548	1	-0.003669	0.049684	0.14707	0.931304	104	2	-0.003669
Riox1	6	0.70866	0.82351	0.999995	580	2	0.23023	0.049956	0.14774	0.931304	105	4	0.23023
Med21	6	0.67145	0.79559	0.999995	550	2	0.26078	0.050278	0.14832	0.931304	106	4	0.26078
Nsa2	5	0.85701	0.86325	0.999995	626	1	0.27534	0.051299	0.14527	0.931304	107	3	0.27534
Top2b	6	0.28484	0.49083	0.999995	304	2	0.17674	0.051486	0.15087	0.931304	108	3	0.17674
Gtpbp4	5	0.77067	0.80901	0.999995	593	1	0.66084	0.051823	0.14654	0.931304	109	4	0.66084
Pa2g4	6	0.69685	0.81451	0.999995	574	1	0.19057	0.051925	0.15177	0.931304	110	3	0.19057
Eif6	5	0.36945	0.54633	0.999995	372	2	-0.16325	0.053717	0.15103	0.931304	111	1	-0.16325
Smchd1	6	0.79259	0.85175	0.999995	601	1	0.24005	0.05393	0.15576	0.931304	112	3	0.24005
Rcl1	6	0.57947	0.7293	0.999995	496	1	0.25169	0.055456	0.15864	0.931304	113	3	0.25169
Rpl28	6	0.13228	0.30679	0.999995	180	3	-0.11929	0.055476	0.15869	0.931304	114	3	-0.11929
Rps11	6	0.52383	0.69071	0.999995	461	2	0.54866	0.055976	0.15976	0.931304	115	4	0.54866
Noc3l	6	0.31217	0.52179	0.999995	327	1	0.44981	0.056652	0.16104	0.931304	116	4	0.44981
Zfp207	6	0.28626	0.49236	0.999995	305	3	-0.19465	0.05692	0.16148	0.931304	117	2	-0.19465
Smc1a	6	0.63735	0.77022	0.999995	525	2	0.3302	0.057176	0.16194	0.931304	118	4	0.3302
Rpf2	6	0.97489	0.97443	0.999995	696	0	0.16236	0.058361	0.16443	0.931304	119	2	0.16236
Wrn	6	0.9839	0.98361	0.999995	708	0	0.28371	0.059664	0.16738	0.931304	120	4	0.28371
Mdn1	6	0.65339	0.78236	0.999995	536	2	0.39834	0.060025	0.1681	0.931304	121	4	0.39834
Rps10	6	0.85148	0.8767	0.999995	624	1	0.23542	0.060434	0.16908	0.931304	122	3	0.23542
Polr1e	6	0.37451	0.59129	0.999995	376	3	0.16134	0.061881	0.17203	0.931304	123	3	0.16134
Nhp2	6	0.37198	0.58845	0.999995	374	1	0.14466	0.062675	0.17355	0.931304	124	3	0.14466
Tcea1	6	0.45445	0.64673	0.999995	424	1	0.20009	0.063346	0.17485	0.931304	125	3	0.20009
Mcm7	6	0.078863	0.20506	0.999995	121	2	0.2881	0.064118	0.17661	0.931304	126	3	0.2881
Ddx39a	6	0.42645	0.62914	0.999995	405	1	0.23569	0.064829	0.17805	0.931304	127	3	0.23569
Farsb	6	0.66175	0.78893	0.999995	541	2	0.18343	0.065542	0.1794	0.931304	128	3	0.18343
NCsgRNA_36	1	0.93398	0.9343	0.999995	664	0	0.52497	0.066019	0.066512	0.813008	129	1	0.52497
Syncrip	6	0.17308	0.35897	0.999995	216	2	-0.04864	0.066564	0.18156	0.931304	130	2	-0.04864
Adarb2	6	0.59825	0.74222	0.999995	510	1	0.23773	0.066766	0.182	0.931304	131	4	0.23773
Gtf2h2	5	0.90485	0.90557	0.999995	646	0	0.55322	0.06687	0.18168	0.931304	132	3	0.55322
2210016L21Rik	6	0.01447	0.053576	0.999995	34	3	-0.17954	0.0678	0.18417	0.931304	133	2	-0.17954
Fau	6	0.15876	0.3417	0.999995	208	2	0.6649	0.070428	0.1894	0.931304	134	3	0.6649
Abt1	6	0.98916	0.98916	0.999995	712	0	0.27664	0.070711	0.19001	0.931304	135	4	0.27664
Metap1	6	0.69685	0.81451	0.999995	575	2	0.25154	0.071138	0.19097	0.931304	136	4	0.25154
Tufm	6	0.51748	0.68661	0.999995	452	2	0.14748	0.071254	0.19117	0.931304	137	3	0.14748
Actr3	6	0.10077	0.24757	0.999995	146	2	0.26527	0.071517	0.19174	0.931304	138	4	0.26527
Rpl9	6	0.038843	0.12022	0.999995	74	4	-1.0589	0.071981	0.19269	0.931304	139	2	-1.0589
Rbm3	6	0.94946	0.94894	0.999995	673	0	0.29124	0.072262	0.19322	0.931304	140	4	0.29124
Hltf	6	0.58167	0.73075	0.999995	499	1	0.063373	0.072677	0.19427	0.931304	141	2	0.063373
Nop53	6	0.32374	0.53472	0.999995	333	2	0.24074	0.073558	0.19592	0.931304	144	4	0.24074
Xpo1	5	0.35614	0.53572	0.999995	363	2	0.41236	0.074452	0.19634	0.931304	145	3	0.41236
Nom1	6	0.64279	0.77446	0.999995	530	1	0.21361	0.074925	0.19885	0.933975	146	4	0.21361
Emg1	6	0.88138	0.89292	0.999995	637	1	0.1349	0.076936	0.20299	0.93519	147	3	0.1349
Rfc1	6	0.68711	0.80694	0.999995	567	2	0.27603	0.077111	0.20329	0.93519	148	4	0.27603
Pnkp	6	0.69501	0.81326	0.999995	571	2	0.34966	0.077749	0.20437	0.93519	149	4	0.34966
Ddx21	6	0.63836	0.77101	0.999995	526	2	0.54958	0.078391	0.2057	0.93519	150	4	0.54958
Erh	6	0.98596	0.98584	0.999995	710	0	0.44265	0.079767	0.20848	0.93519	151	3	0.44265
2310033P09Rik	6	0.16065	0.34413	0.999995	209	2	0.18895	0.080117	0.2091	0.93519	152	4	0.18895
Zfp622	6	0.88009	0.8923	0.999995	636	1	0.21014	0.080124	0.20914	0.93519	153	3	0.21014
Hnrnpk	6	0.47696	0.66083	0.999995	432	2	0.11941	0.08259	0.21394	0.93519	154	1	0.11941
Prkdc	6	0.94127	0.94024	0.999995	668	0	0.17301	0.084312	0.21729	0.93519	155	4	0.17301
Ercc2	6	0.25735	0.46043	0.999995	283	2	0.28111	0.084621	0.21787	0.93519	156	2	0.28111
Urb1	6	0.1853	0.37392	0.999995	223	3	-0.10006	0.085406	0.21935	0.93519	157	2	-0.10006
Rps17	6	0.09168	0.22975	0.999995	137	4	-0.72564	0.086811	0.22201	0.93519	159	2	-0.72564
Ube2i	5	0.033007	0.098708	0.999995	61	3	-0.4676	0.087055	0.21634	0.93519	160	2	-0.4676
Fus	6	0.77701	0.84649	0.999995	596	1	0.30621	0.087489	0.22323	0.93519	161	4	0.30621
Ddx5	6	0.33189	0.54414	0.999995	342	1	0.42835	0.087782	0.2237	0.93519	162	3	0.42835
Hsp90ab1	6	0.50235	0.67676	0.999995	444	2	0.24815	0.087827	0.22377	0.93519	163	3	0.24815
Tcof1	6	0.57006	0.72255	0.999995	487	2	0.064541	0.088215	0.22443	0.93519	164	3	0.064541
Mcm6	6	0.82952	0.86638	0.999995	617	1	0.24399	0.088412	0.22481	0.93519	165	3	0.24399
Ppif	6	0.042378	0.12804	0.999995	76	2	0.085423	0.089149	0.22611	0.935272	166	2	0.085423
Supt16	5	0.85406	0.86113	0.999995	625	1	0.50255	0.0894	0.21995	0.93519	167	3	0.50255
Snu13	4	0.073137	0.1652	0.999995	113	2	-0.041359	0.089676	0.19701	0.931304	168	2	-0.041359
Pds5a	6	0.94027	0.93934	0.999995	666	0	0.22028	0.09027	0.22833	0.939133	169	4	0.22028
H1f4	6	0.91616	0.91652	0.999995	654	1	0.23053	0.092264	0.23221	0.942503	170	4	0.23053
Prdx1	6	0.64022	0.77244	0.999995	529	1	0.26961	0.092391	0.23252	0.942503	171	4	0.26961
Rps9	6	0.38523	0.60302	0.999995	383	2	-0.053645	0.09381	0.23527	0.942503	172	2	-0.053645
Zfp106	6	0.69629	0.81412	0.999995	573	1	0.13004	0.093822	0.23528	0.942503	173	4	0.13004
Pcbp1	6	0.96896	0.96876	0.999995	689	0	0.27131	0.094373	0.23634	0.942503	174	4	0.27131
Rpf1	6	0.12048	0.28496	0.999995	172	3	-0.064216	0.095205	0.23796	0.942503	175	3	-0.064216
Eef1a1	6	0.036581	0.11538	0.999995	67	3	-0.27734	0.096598	0.24084	0.942503	176	2	-0.27734
H1f5	6	0.59469	0.73958	0.999995	506	1	0.17855	0.098689	0.24491	0.942503	177	4	0.17855
Nvl	6	0.51705	0.68629	0.999995	451	2	0.2273	0.099378	0.24627	0.942503	178	3	0.2273
Snrpg	6	0.42166	0.62635	0.999995	403	2	0.1103	0.099872	0.24715	0.942503	179	2	0.1103
Smarca4	6	0.037032	0.11625	0.999995	69	3	0.04953	0.099906	0.24723	0.942503	180	3	0.04953
Rpp14	6	0.82813	0.86581	0.999995	616	1	0.11924	0.10611	0.25875	0.968589	181	3	0.11924
NCsgRNA_11	1	0.89233	0.89333	0.999995	640	0	0.37317	0.10767	0.10835	0.896378	182	1	0.37317
Utp25	6	0.9583	0.95768	0.999995	682	0	0.10395	0.10768	0.2619	0.968589	183	2	0.10395
Rpl19	5	0.68868	0.77151	0.999995	569	1	-0.22394	0.10799	0.24728	0.942503	184	1	-0.22394
Hmga1	6	0.96863	0.96835	0.999995	687	0	0.22421	0.10809	0.26264	0.968589	185	4	0.22421
Dnttip2	6	0.9751	0.97463	0.999995	697	0	0.23562	0.1085	0.26343	0.968589	186	4	0.23562
Mcm5	6	0.36839	0.58423	0.999995	370	2	0.11945	0.11043	0.26699	0.971811	187	3	0.11945
Usp39	6	0.92635	0.92526	0.999995	656	1	0.1765	0.11112	0.26837	0.971811	188	3	0.1765
Prpf8	6	0.45781	0.64895	0.999995	426	2	0.31674	0.11125	0.26859	0.971811	189	4	0.31674
Arpc2	6	0.015239	0.056215	0.999995	37	3	-0.40204	0.1118	0.26965	0.971811	190	1	-0.40204
Gnl3	6	0.17175	0.3575	0.999995	215	2	0.12926	0.11317	0.2724	0.972118	191	2	0.12926
H1f2	6	0.38825	0.60598	0.999995	384	2	0.20346	0.11339	0.27276	0.972118	192	4	0.20346
Hspd1	6	0.24834	0.44934	0.999995	274	3	0.022219	0.11397	0.27374	0.972118	193	3	0.022219
Rpsa	5	0.41315	0.58138	0.999995	399	1	0.063323	0.11585	0.25846	0.968589	194	2	0.063323
Pdcd6	6	0.45262	0.64531	0.999995	423	1	0.18496	0.11677	0.27884	0.978301	195	3	0.18496
Mcm3	5	0.55799	0.70196	0.999995	482	2	0.22012	0.11836	0.26205	0.968589	196	3	0.22012
Wdr46	6	0.34421	0.55755	0.999995	354	2	0.24338	0.1194	0.28353	0.978301	197	4	0.24338
Utp20	6	0.57227	0.72415	0.999995	489	2	0.18721	0.12079	0.28605	0.978301	198	4	0.18721
Rrp7a	6	0.68241	0.80353	0.999995	562	2	0.19556	0.12134	0.28705	0.978301	199	4	0.19556
Atrip	6	0.22907	0.42661	0.999995	258	3	-0.11529	0.12136	0.2871	0.978301	200	2	-0.11529
Dkc1	6	0.62107	0.75857	0.999995	519	2	-0.072514	0.122	0.28838	0.978301	201	2	-0.072514
Serbp1	6	0.5615	0.71668	0.999995	483	1	0.20689	0.12301	0.29027	0.978301	202	3	0.20689
Gtf2i	6	0.79784	0.85338	0.999995	603	1	0.18642	0.12644	0.29681	0.98842	203	4	0.18642
Rpp40	6	0.30437	0.51271	0.999995	319	2	0.0052556	0.12679	0.29734	0.98842	204	3	0.0052556
NCsgRNA_58	1	0.87289	0.87353	0.999995	634	0	0.4133	0.12711	0.12772	0.931304	205	1	0.4133
Srfbp1	5	0.30152	0.493	0.999995	316	2	-0.029147	0.12901	0.27754	0.978301	206	2	-0.029147
Ppp1cb	6	0.52671	0.69261	0.999995	463	2	0.17715	0.13049	0.304	0.991859	207	4	0.17715
Nusap1	6	0.34669	0.55993	0.999995	357	2	0.21232	0.13097	0.30486	0.991859	208	4	0.21232
Hnrnph3	6	0.11796	0.28044	0.999995	168	3	-0.18428	0.13124	0.30532	0.991859	209	2	-0.18428
Ssrp1	6	0.083641	0.2145	0.999995	128	4	-0.3202	0.13219	0.30689	0.991859	210	2	-0.3202
Csnk2a2	6	0.99508	0.99497	0.999995	718	0	0.27836	0.13225	0.307	0.991859	211	4	0.27836
Rpl26	5	0.29408	0.48749	0.999995	312	1	-0.055016	0.13313	0.28333	0.978301	212	2	-0.055016
Rrp36	6	0.23277	0.43104	0.999995	262	3	0.04578	0.13384	0.30992	0.991859	213	3	0.04578
Rbm14	6	0.072677	0.19241	0.999995	112	2	0.17215	0.13521	0.31224	0.991859	214	4	0.17215
Mrrf	6	0.3197	0.53059	0.999995	331	3	-0.12327	0.13622	0.31409	0.991859	215	1	-0.12327
Top2a	6	0.69593	0.81386	0.999995	572	2	-0.10611	0.13756	0.31651	0.991859	216	2	-0.10611
Nsun5	6	0.90481	0.90811	0.999995	645	1	0.15297	0.13854	0.31863	0.991859	217	3	0.15297
Nosip	6	0.98109	0.98055	0.999995	703	0	0.11595	0.13856	0.31864	0.991859	218	3	0.11595
Cdca8	5	0.24511	0.43977	0.999995	271	3	-0.2416	0.13995	0.29291	0.982677	219	2	-0.2416
Pwp1	6	0.3349	0.54748	0.999995	345	2	0.19386	0.14094	0.3228	0.991859	220	4	0.19386
Srsf3	6	0.15745	0.3401	0.999995	205	2	0.24833	0.14186	0.32457	0.991859	221	4	0.24833
Wdr18	6	0.37709	0.59401	0.999995	378	3	-0.091305	0.1429	0.32616	0.991859	222	1	-0.091305
Srp9	6	0.13353	0.30917	0.999995	181	1	0.0041637	0.14493	0.32987	0.991859	223	2	0.0041637
Rpl4	5	0.42786	0.59362	0.999995	407	2	0.34032	0.14495	0.29973	0.991841	224	3	0.34032
Ddx17	6	0.97084	0.97072	0.999995	693	0	0.27878	0.14681	0.33318	0.991859	225	4	0.27878
Arpc1a	6	0.48231	0.66436	0.999995	434	2	0.12259	0.14761	0.33464	0.991859	226	3	0.12259
Exosc9	6	0.10953	0.26443	0.999995	161	2	0.035304	0.14821	0.33578	0.991859	227	2	0.035304
Ddx55	6	0.5455	0.70539	0.999995	476	2	0.22927	0.14869	0.33652	0.991859	228	4	0.22927
Snrpe	6	0.42261	0.62683	0.999995	404	2	0.16972	0.1503	0.33945	0.996446	229	3	0.16972
Lyar	6	0.70951	0.82416	0.999995	581	1	0.15173	0.15192	0.34134	0.997963	230	3	0.15173
NCsgRNA_46	1	0.84436	0.84506	0.999995	620	0	0.34807	0.15564	0.15516	0.931304	231	1	0.34807
Rps5	6	0.33726	0.5501	0.999995	346	3	-0.13613	0.15613	0.34642	0.998381	232	2	-0.13613
Rnf20	6	0.30579	0.51441	0.999995	321	3	-0.067124	0.15876	0.34934	0.998381	233	3	-0.067124
NCsgRNA_37	1	0.84057	0.84146	0.999995	619	0	0.39451	0.15943	0.15901	0.931304	234	1	0.39451
Pdcd11	6	0.63239	0.76661	0.999995	523	1	0.063744	0.1612	0.35235	0.998381	235	2	0.063744
Ruvbl1	6	0.77176	0.84441	0.999995	594	1	0.14544	0.16138	0.35259	0.998381	236	3	0.14544
Xrcc6	6	0.76093	0.84087	0.999995	591	1	0.01545	0.16269	0.35439	0.998381	237	2	0.01545
Rpl18a	6	0.25978	0.46301	0.999995	286	2	0.036446	0.16399	0.35579	0.998381	238	1	0.036446
Pwp2	6	0.43966	0.63738	0.999995	414	2	0.035525	0.1653	0.3574	0.998381	239	1	0.035525
Senp3	6	0.95382	0.95327	0.999995	676	0	0.13796	0.16754	0.36006	0.998381	240	3	0.13796
Cpsf6	6	0.94283	0.94191	0.999995	669	0	0.11357	0.16794	0.36041	0.998381	241	3	0.11357
Rfc3	5	0.51874	0.6677	0.999995	454	1	0.15518	0.16853	0.33373	0.991859	242	3	0.15518
Srp72	6	0.66834	0.79357	0.999995	547	1	0.040488	0.1705	0.36327	0.998381	243	2	0.040488
Rpl10	6	0.071559	0.18991	0.999995	108	2	0.32162	0.17355	0.36666	0.998381	244	3	0.32162
NCsgRNA_18	1	0.82643	0.82729	0.999995	615	0	0.3074	0.17357	0.17359	0.931304	245	1	0.3074
Bop1	6	0.91363	0.91445	0.999995	651	1	0.19094	0.17476	0.36831	0.998381	246	3	0.19094
Ddx52	6	0.53072	0.69551	0.999995	467	2	0.25521	0.17696	0.37075	0.998381	247	3	0.25521
Eif2s1	6	0.83056	0.86692	0.999995	618	1	0.09779	0.17906	0.37345	0.998381	248	2	0.09779
Nipbl	6	0.61083	0.75118	0.999995	515	1	0.14004	0.17965	0.37401	0.998381	249	3	0.14004
Prpf4	6	0.35745	0.57176	0.999995	366	2	0.17476	0.18047	0.37496	0.998381	250	3	0.17476
Rpl27a	5	0.26391	0.46348	0.999995	290	2	0.35685	0.1848	0.35664	0.998381	251	3	0.35685
NCsgRNA_4	1	0.81457	0.81582	0.999995	610	0	0.26385	0.18543	0.18471	0.931304	252	1	0.26385
Pqbp1	6	0.86022	0.8813	0.999995	628	1	0.18105	0.18708	0.38257	0.998381	253	3	0.18105
Bzw1	6	0.87536	0.88978	0.999995	635	1	0.14675	0.18749	0.38313	0.998381	254	3	0.14675
Mphosph6	5	0.42134	0.58816	0.999995	402	1	0.18423	0.19004	0.36393	0.998381	255	3	0.18423
NCsgRNA_60	1	0.80977	0.81128	0.999995	609	0	0.28902	0.19023	0.18964	0.931304	256	1	0.28902
Wbp11	6	0.40237	0.61437	0.999995	390	2	0.23312	0.1921	0.38871	0.998381	257	3	0.23312
Fen1	6	0.29197	0.49863	0.999995	310	2	0.054477	0.19217	0.3888	0.998381	258	2	0.054477
Kri1	6	0.7549	0.8389	0.999995	588	1	0.097281	0.19229	0.38896	0.998381	259	1	0.097281
Med10	6	0.2736	0.47853	0.999995	298	1	0.11632	0.19356	0.39031	0.998381	260	2	0.11632
Ccdc59	6	0.15482	0.33719	0.999995	203	2	0.12849	0.19548	0.39228	0.998381	261	3	0.12849
Skp1	6	0.081179	0.20973	0.999995	124	2	0.17492	0.1962	0.39302	0.998381	262	3	0.17492
Rrp15	6	0.909	0.91099	0.999995	649	1	0.069579	0.19735	0.39441	0.998381	263	2	0.069579
Pes1	6	0.22967	0.42738	0.999995	259	2	-0.07562	0.19861	0.39555	0.998381	264	1	-0.07562
Morf4l1	4	0.64499	0.698	0.999995	531	1	0.095868	0.19964	0.35022	0.998381	265	2	0.095868
Bms1	6	0.21368	0.40746	0.999995	246	2	0.061908	0.20188	0.39945	0.998381	266	3	0.061908
Thyn1	6	0.093582	0.23354	0.999995	142	4	-0.24347	0.20614	0.40463	0.998381	267	2	-0.24347
Rpl37a	3	0.22107	0.33962	0.999995	250	1	0.24892	0.20623	0.32221	0.991859	268	2	0.24892
Rps14	6	0.5221	0.68961	0.999995	458	2	0.049773	0.20792	0.40664	0.998381	269	3	0.049773
Rbm4	6	0.078352	0.20397	0.999995	120	1	0.15381	0.20836	0.40711	0.998381	270	3	0.15381
Wdr74	6	0.046937	0.13869	0.999995	83	2	0.24583	0.20841	0.40714	0.998381	271	3	0.24583
Lmna	6	0.94636	0.94555	0.999995	672	0	0.21553	0.20923	0.40813	0.998381	272	3	0.21553
Mroh8	6	0.67529	0.79854	0.999995	556	2	-0.0029535	0.21016	0.40905	0.998381	273	2	-0.0029535
Nol7	6	0.20059	0.3917	0.999995	237	3	-0.28527	0.21112	0.4101	0.998381	274	2	-0.28527
Pno1	6	0.32646	0.53785	0.999995	336	2	0.13629	0.21141	0.41034	0.998381	275	3	0.13629
Brix1	6	0.28969	0.49594	0.999995	308	2	0.089119	0.21192	0.41093	0.998381	276	2	0.089119
Exosc5	6	0.3408	0.55394	0.999995	350	3	-0.060614	0.21236	0.4116	0.998381	277	1	-0.060614
Ppib	6	0.97255	0.97234	0.999995	694	0	0.1988	0.21272	0.41204	0.998381	278	3	0.1988
Bysl	6	0.4421	0.63881	0.999995	418	2	0.027521	0.21545	0.41494	0.998381	279	2	0.027521
Pop4	6	0.529	0.69442	0.999995	466	2	0.02125	0.21608	0.41573	0.998381	280	1	0.02125
Pelo	6	0.21781	0.41238	0.999995	247	2	-0.080777	0.21732	0.41718	0.998381	281	2	-0.080777
NCsgRNA_39	1	0.78124	0.7833	0.999995	600	0	0.21432	0.21876	0.21842	0.93519	282	1	0.21432
Srsf6	5	0.86329	0.86785	0.999995	630	1	0.16745	0.21911	0.40506	0.998381	283	3	0.16745
Abcf1	6	0.33929	0.5524	0.999995	349	3	-0.11139	0.21978	0.4202	0.998381	284	1	-0.11139
Rpl27	6	0.095158	0.2366	0.999995	144	4	-0.31041	0.22076	0.42141	0.998381	285	2	-0.31041
Imp3	6	0.29306	0.50004	0.999995	311	3	0.13279	0.2211	0.4218	0.998381	286	3	0.13279
Fanci	6	0.40667	0.6167	0.999995	393	2	0.076307	0.22135	0.42203	0.998381	287	3	0.076307
Wdr36	6	0.67254	0.79647	0.999995	553	2	0.23867	0.22155	0.42228	0.998381	288	3	0.23867
Ppp1cc	6	0.9688	0.96863	0.999995	688	0	0.016296	0.22313	0.42423	0.998381	289	2	0.016296
Rbm8a	5	0.30363	0.49461	0.999995	318	2	0.29623	0.22462	0.41273	0.998381	290	2	0.29623
Eif2s3x	6	0.50644	0.67919	0.999995	445	2	0.015441	0.22467	0.42618	0.998381	291	3	0.015441
Urb2	6	0.44339	0.6394	0.999995	419	2	0.099159	0.22511	0.42677	0.998381	292	3	0.099159
Mki67	6	0.32622	0.53762	0.999995	335	2	-0.11274	0.22592	0.42782	0.998381	293	1	-0.11274
Kpna3	5	0.78023	0.81419	0.999995	598	1	0.13901	0.22705	0.41606	0.998381	294	3	0.13901
Rif1	6	0.66713	0.79271	0.999995	545	2	-0.055711	0.22714	0.42926	0.998381	295	1	-0.055711
Wdr12	6	0.7439	0.83553	0.999995	586	1	0.18595	0.23186	0.43499	0.998381	296	3	0.18595
Rbbp4	6	0.61206	0.7521	0.999995	516	2	0.16977	0.23566	0.43915	0.998381	297	2	0.16977
Gapdh	6	0.35103	0.56506	0.999995	359	2	-0.094991	0.23864	0.44265	0.998381	298	2	-0.094991
Ola1	6	0.84455	0.87308	0.999995	621	1	-0.018494	0.23928	0.44342	0.998381	299	2	-0.018494
Nol8	6	0.27127	0.47553	0.999995	296	2	0.26333	0.23959	0.44385	0.998381	300	3	0.26333
Kpna4	6	0.14856	0.32936	0.999995	196	3	-0.19848	0.24044	0.44482	0.998381	301	2	-0.19848
Ddx3x	6	0.2429	0.44308	0.999995	268	1	-0.10606	0.24169	0.44623	0.998381	302	2	-0.10606
NCsgRNA_64	1	0.75726	0.75902	0.999995	590	0	0.35542	0.24274	0.24263	0.942503	303	1	0.35542
Mtrex	6	0.57336	0.72496	0.999995	491	2	0.06349	0.2429	0.4476	0.998381	304	3	0.06349
NCsgRNA_32	1	0.75701	0.75866	0.999995	589	0	0.19212	0.24299	0.2429	0.942503	305	1	0.19212
Psma7	6	0.13097	0.30454	0.999995	178	3	-0.28901	0.24326	0.44812	0.998381	306	3	-0.28901
Smarca5	6	0.68146	0.80291	0.999995	560	2	0.22555	0.24649	0.4517	0.998381	307	3	0.22555
Srpk1	6	0.36579	0.58141	0.999995	367	1	0.17541	0.24787	0.45321	0.998381	308	3	0.17541
Rps19bp1	6	0.84487	0.87324	0.999995	622	1	0.16883	0.25066	0.45641	0.998381	309	3	0.16883
Ddx18	6	0.19356	0.38407	0.999995	229	2	0.085807	0.25205	0.4581	0.998381	310	3	0.085807
Cycs	6	0.26309	0.46644	0.999995	288	2	0.26693	0.25298	0.45919	0.998381	311	3	0.26693
Sf3b2	6	0.16241	0.34656	0.999995	210	3	-0.31013	0.25364	0.45984	0.998381	312	1	-0.31013
Esf1	5	0.094227	0.22392	0.999995	143	3	-0.37949	0.25403	0.45202	0.998381	313	2	-0.37949
NCsgRNA_49	1	0.74489	0.74643	0.999995	587	0	0.22705	0.25511	0.25514	0.96742	314	1	0.22705
Csnk2a1	6	0.023848	0.083767	0.999995	49	5	-0.2406	0.25601	0.4626	0.998381	315	1	-0.2406
Cdk2	6	0.046777	0.13832	0.999995	82	2	0.10253	0.25719	0.46421	0.998381	316	3	0.10253
Srsf1	6	0.0038078	0.017081	0.540663	22	4	-0.70464	0.25735	0.46443	0.998381	317	2	-0.70464
Rps28	6	0.39923	0.61248	0.999995	388	1	0.16751	0.26047	0.46764	0.998381	318	3	0.16751
Tubb4b	6	0.72535	0.82968	0.999995	584	1	0.14285	0.26236	0.46947	0.998381	319	3	0.14285
Rrn3	5	0.2101	0.39098	0.999995	244	1	0.30003	0.26236	0.46281	0.998381	320	2	0.30003
Dync1h1	6	0.69908	0.81632	0.999995	576	2	0.07878	0.26343	0.47078	0.998381	321	3	0.07878
B3gnt5	6	0.29715	0.50471	0.999995	314	2	-0.047834	0.26544	0.47289	0.998381	322	1	-0.047834
Macroh2a1	6	0.90714	0.90984	0.999995	647	1	0.10176	0.26661	0.47403	0.998381	323	3	0.10176
Csnk1d	6	0.28976	0.496	0.999995	309	2	0.034359	0.26804	0.47554	0.998381	324	3	0.034359
Gtf2b	6	0.95217	0.9516	0.999995	674	0	0.13262	0.26891	0.47661	0.998381	325	2	0.13262
Mphosph10	6	0.18848	0.37783	0.999995	225	2	0.059585	0.26894	0.47667	0.998381	326	1	0.059585
Rpl10a	6	0.052589	0.15073	0.999995	92	3	-0.42297	0.27127	0.47902	0.998381	327	1	-0.42297
Pop7	6	0.26236	0.46561	0.999995	287	3	-0.29232	0.27136	0.47914	0.998381	328	2	-0.29232
Hnrnpa0	6	0.60308	0.74581	0.999995	513	2	0.15538	0.27327	0.48154	0.998381	329	3	0.15538
Exosc2	6	0.63938	0.7718	0.999995	527	2	0.065759	0.27441	0.48291	0.998381	330	3	0.065759
Polr1c	6	0.059333	0.16435	0.999995	101	2	0.047258	0.27662	0.48561	0.998381	331	3	0.047258
Rpl29	5	0.91994	0.92106	0.999995	655	0	0.1522	0.27776	0.48251	0.998381	332	3	0.1522
Utp23	6	0.27184	0.47618	0.999995	297	3	-0.12409	0.28115	0.49024	0.998381	333	2	-0.12409
Srp19	6	0.84773	0.87485	0.999995	623	1	0.07701	0.28168	0.49082	0.998381	334	3	0.07701
S100a13	6	0.18337	0.37163	0.999995	222	2	0.025727	0.28288	0.49195	0.998381	335	3	0.025727
NCsgRNA_50	1	0.71358	0.71477	0.999995	583	0	0.18943	0.28642	0.28673	0.978301	336	1	0.18943
Rtf2	6	0.36777	0.58341	0.999995	369	2	0.064463	0.2882	0.49744	0.998381	337	3	0.064463
NCsgRNA_33	1	0.71106	0.71199	0.999995	582	0	0.16817	0.28894	0.2893	0.978301	338	1	0.16817
Exosc3	6	0.68429	0.80499	0.999995	563	2	0.15176	0.29037	0.49975	0.998381	339	2	0.15176
Cbx5	6	0.25601	0.45856	0.999995	282	2	-0.12446	0.29083	0.50028	0.998381	340	2	-0.12446
Rad50	6	0.51124	0.68239	0.999995	447	2	0.19285	0.29209	0.50174	0.998381	341	3	0.19285
Frg1	6	0.1705	0.35606	0.999995	213	2	-0.071868	0.29537	0.50536	0.998381	342	1	-0.071868
Pop1	6	0.55282	0.71032	0.999995	478	2	0.14547	0.29599	0.50611	0.998381	343	3	0.14547
Hnrnpc	6	0.19909	0.38996	0.999995	234	2	0.0081245	0.29653	0.5068	0.998381	344	2	0.0081245
Sumo1	6	0.65635	0.78463	0.999995	538	2	0.15641	0.299	0.50947	0.998381	345	3	0.15641
2810004N23Rik	6	0.95429	0.9537	0.999995	677	0	0.16041	0.3004	0.51106	0.998381	346	3	0.16041
Snrpa	6	0.39026	0.60712	0.999995	385	2	0.035215	0.30325	0.51418	0.998381	347	2	0.035215
H2ac18	6	0.97888	0.97853	0.999995	699	0	0.1948	0.30394	0.51484	0.998381	348	3	0.1948
Anxa2	6	0.98423	0.98394	0.999995	709	0	0.10251	0.30549	0.51663	0.998381	349	3	0.10251
Srsf2	6	0.093104	0.23258	0.999995	140	4	-0.56359	0.30703	0.51847	0.998381	350	2	-0.56359
Ctdspl2	6	0.054381	0.15401	0.999995	96	3	-0.23886	0.30773	0.51931	0.998381	351	2	-0.23886
Rpl7a	6	0.2441	0.44463	0.999995	270	1	0.15564	0.31026	0.52217	0.998381	352	3	0.15564
Cdkn2b	6	0.578	0.72824	0.999995	495	2	0.073322	0.31075	0.52269	0.998381	353	3	0.073322
H2ac4	6	0.52199	0.68953	0.999995	457	2	0.10053	0.31472	0.52729	0.998381	354	3	0.10053
NCsgRNA_57	1	0.68505	0.68654	0.999995	565	0	0.12416	0.31495	0.31508	0.991859	355	1	0.12416
Hdac2	6	0.39626	0.61083	0.999995	387	2	0.061838	0.3177	0.53062	0.998381	356	3	0.061838
Ddx46	5	0.22462	0.41182	0.999995	253	2	-0.012487	0.31789	0.51448	0.998381	357	2	-0.012487
NCsgRNA_29	1	0.68202	0.68353	0.999995	561	0	0.17293	0.31798	0.31807	0.991859	358	1	0.17293
Kif2c	6	0.65783	0.78569	0.999995	539	2	0.029638	0.3187	0.53175	0.998381	359	3	0.029638
Eif5a2	6	0.54131	0.7025	0.999995	474	2	-0.0065401	0.31878	0.53182	0.998381	360	2	-0.0065401
Kin	6	0.52037	0.68846	0.999995	456	2	-0.059736	0.3199	0.53287	0.998381	361	2	-0.059736
NCsgRNA_5	1	0.67496	0.67691	0.999995	555	0	0.10589	0.32504	0.32521	0.991859	362	1	0.10589
Krr1	5	0.49179	0.64543	0.999995	439	2	0.021874	0.32597	0.52018	0.998381	363	1	0.021874
Mak16	6	0.11577	0.27655	0.999995	163	3	-0.18197	0.3267	0.54009	0.998381	364	3	-0.18197
Rrp12	6	0.57061	0.7229	0.999995	488	2	-0.031241	0.32684	0.54023	0.998381	365	2	-0.031241
NCsgRNA_2	1	0.67294	0.67499	0.999995	554	0	0.1561	0.32706	0.32703	0.991859	366	1	0.1561
Edf1	6	0.79824	0.8535	0.999995	604	1	0.12631	0.32755	0.54092	0.998381	367	3	0.12631
Prpf3	6	0.53972	0.70144	0.999995	472	2	0.014371	0.32864	0.54207	0.998381	368	2	0.014371
NCsgRNA_51	1	0.67041	0.6726	0.999995	549	0	0.14488	0.32959	0.32963	0.991859	369	1	0.14488
Cbx1	6	0.055839	0.15701	0.999995	98	2	0.0034323	0.33189	0.54598	0.998381	370	2	0.0034323
NCsgRNA_31	1	0.66789	0.67022	0.999995	546	0	0.16802	0.33211	0.3322	0.991859	371	1	0.16802
Atp5if1	6	0.43403	0.63373	0.999995	410	2	0.055158	0.33242	0.54655	0.998381	372	2	0.055158
Las1l	6	0.78046	0.84764	0.999995	599	1	-0.049891	0.33298	0.5472	0.998381	373	1	-0.049891
Dek	6	0.73199	0.83191	0.999995	585	1	0.0021579	0.33428	0.5487	0.998381	374	2	0.0021579
Sub1	6	0.029001	0.098876	0.999995	57	3	-0.23821	0.33514	0.54949	0.998381	375	2	-0.23821
Mlkl	6	0.89055	0.89862	0.999995	639	1	0.074254	0.33676	0.55125	0.998381	376	2	0.074254
Ahctf1	6	0.96963	0.96957	0.999995	691	0	0.1859	0.33777	0.55242	0.998381	377	3	0.1859
Dhx37	6	0.90982	0.91156	0.999995	650	1	0.033167	0.338	0.55268	0.998381	378	3	0.033167
Mcm2	6	0.49088	0.66936	0.999995	437	2	0.15623	0.33827	0.55289	0.998381	379	3	0.15623
Polr1a	6	0.85756	0.87985	0.999995	627	1	0.13066	0.33878	0.55349	0.998381	380	3	0.13066
Nsmce3	6	0.52843	0.69401	0.999995	465	2	0.063092	0.33929	0.55401	0.998381	381	3	0.063092
Nol11	6	0.19803	0.38887	0.999995	232	3	-0.17687	0.33944	0.55416	0.998381	382	2	-0.17687
Wdr55	6	0.24345	0.44388	0.999995	269	2	-0.090039	0.33979	0.55445	0.998381	383	3	-0.090039
Smc3	6	0.27041	0.47473	0.999995	295	3	-0.073303	0.34158	0.55632	0.998381	384	3	-0.073303
Gtf2f1	6	0.32188	0.53287	0.999995	332	2	0.039624	0.34435	0.55918	0.998381	385	3	0.039624
Ubtf	6	0.0374	0.11715	0.999995	72	3	-0.56419	0.34584	0.56074	0.998381	386	2	-0.56419
Utp6	6	0.19102	0.38099	0.999995	227	3	-0.23451	0.34691	0.56158	0.998381	387	2	-0.23451
NCsgRNA_61	1	0.65249	0.65527	0.999995	535	0	0.14997	0.34751	0.34807	0.998381	388	1	0.14997
Rps25	6	0.10168	0.24926	0.999995	148	4	-0.31874	0.34917	0.56433	0.998381	389	2	-0.31874
Tbl3	6	0.67241	0.79635	0.999995	552	2	-0.034424	0.35641	0.57177	0.998381	390	2	-0.034424
Etf1	6	0.59293	0.73862	0.999995	505	2	0.21265	0.35707	0.57258	0.998381	391	3	0.21265
Ncaph2	6	0.21855	0.41337	0.999995	248	2	0.03708	0.35909	0.57492	0.998381	392	3	0.03708
Nop10	6	0.3277	0.53908	0.999995	338	3	-0.087848	0.36281	0.57921	0.998381	393	2	-0.087848
Kpna2	6	0.077555	0.20233	0.999995	118	3	-0.13827	0.36372	0.58016	0.998381	394	1	-0.13827
Ywhae	6	0.44153	0.63849	0.999995	417	2	0.09583	0.36526	0.58185	0.998381	395	3	0.09583
Rexo4	6	0.64942	0.77939	0.999995	533	2	-0.061002	0.36529	0.58187	0.998381	396	2	-0.061002
NCsgRNA_40	1	0.6338	0.63623	0.999995	524	0	0.10539	0.3662	0.36641	0.998381	397	1	0.10539
Nol6	6	0.14296	0.32243	0.999995	192	3	-0.14749	0.36731	0.58385	0.998381	398	3	-0.14749
NCsgRNA_1	1	0.63128	0.63374	0.999995	522	0	0.095615	0.36872	0.36905	0.998381	399	1	0.095615
Rps19	6	0.18246	0.37062	0.999995	221	3	-0.16733	0.36963	0.58645	0.998381	400	2	-0.16733
Wdr75	6	0.31323	0.52306	0.999995	328	3	-0.034617	0.36988	0.58663	0.998381	401	3	-0.034617
NCsgRNA_48	1	0.62775	0.62998	0.999995	521	0	0.10277	0.37225	0.37251	0.998381	402	1	0.10277
Zfr	6	0.26661	0.47033	0.999995	293	2	0.0028522	0.37301	0.59028	0.998381	403	2	0.0028522
Shmt2	6	0.98169	0.98115	0.999995	704	0	0.095596	0.37503	0.59255	0.998381	404	3	0.095596
Eif5b	6	0.23186	0.43013	0.999995	260	3	-0.20984	0.37506	0.59261	0.998381	405	2	-0.20984
Rbbp7	6	0.35641	0.57053	0.999995	364	2	0.025169	0.37606	0.59361	0.998381	406	3	0.025169
Wdr5	6	0.41685	0.62323	0.999995	401	2	0.17628	0.37644	0.594	0.998381	407	2	0.17628
Nol12	6	0.20738	0.40029	0.999995	242	1	0.036277	0.38015	0.59791	0.998381	408	2	0.036277
Exosc4	6	0.041014	0.12503	0.999995	75	3	-0.19042	0.38016	0.59793	0.998381	409	1	-0.19042
Wdr89	6	0.55618	0.71289	0.999995	480	2	0.053607	0.38173	0.59956	0.998381	410	3	0.053607
Nop58	6	0.59936	0.74301	0.999995	511	2	-0.17424	0.38219	0.59999	0.998381	411	2	-0.17424
Sarnp	6	0.016144	0.059061	0.999995	38	4	-0.3423	0.38386	0.60194	0.998381	412	2	-0.3423
Hp1bp3	6	0.17343	0.35942	0.999995	217	3	-0.11078	0.38523	0.6034	0.998381	413	1	-0.11078
Dhx15	6	0.57355	0.72512	0.999995	492	2	-0.052863	0.38725	0.60572	0.998381	414	1	-0.052863
Isg20l2	6	0.14954	0.33066	0.999995	198	1	0.15626	0.39	0.60842	0.998381	415	3	0.15626
Rbm19	6	0.37506	0.59202	0.999995	377	1	-0.088432	0.39127	0.60983	0.998381	416	1	-0.088432
Srp14	6	0.22837	0.42578	0.999995	257	2	-0.16056	0.39363	0.61224	0.998381	417	3	-0.16056
Cct7	5	0.59097	0.72952	0.999995	503	1	-0.021754	0.39394	0.57232	0.998381	418	2	-0.021754
Mdh2	6	0.97467	0.97428	0.999995	695	0	0.075718	0.39426	0.61297	0.998381	419	2	0.075718
Usp36	6	0.016675	0.060652	0.999995	40	4	-0.46542	0.39626	0.61501	0.998381	420	2	-0.46542
NCsgRNA_53	1	0.603	0.60461	0.999995	512	0	0.08813	0.397	0.3974	0.998381	421	0	0.08813
Top1	6	0.44816	0.64224	0.999995	421	2	-0.053649	0.39991	0.61881	0.998381	422	2	-0.053649
Mrto4	6	0.10353	0.25279	0.999995	150	2	-0.025111	0.40052	0.61966	0.998381	423	2	-0.025111
Knop1	6	0.37915	0.59624	0.999995	381	3	-0.015291	0.4009	0.62002	0.998381	424	3	-0.015291
Nepro	6	0.17073	0.35634	0.999995	214	3	-0.16904	0.40121	0.62046	0.998381	425	1	-0.16904
H3f4	6	0.0074702	0.030086	0.724646	27	4	-0.38124	0.40175	0.62102	0.998381	426	2	-0.38124
S100a4	6	0.15086	0.33214	0.999995	199	2	0.01805	0.40194	0.6212	0.998381	427	3	0.01805
Adar	6	0.30023	0.50826	0.999995	315	2	0.036729	0.4022	0.62144	0.998381	428	2	0.036729
Polr2e	6	0.59111	0.73745	0.999995	504	2	-0.032504	0.40246	0.6216	0.998381	429	3	-0.032504
Nop16	6	0.30779	0.51682	0.999995	324	3	-0.27644	0.40298	0.62213	0.998381	430	2	-0.27644
Heatr1	6	0.073853	0.19472	0.999995	114	3	-0.34666	0.40417	0.62333	0.998381	431	2	-0.34666
Nolc1	6	0.43177	0.63236	0.999995	408	2	-0.14189	0.40712	0.62615	0.998381	432	1	-0.14189
Ddx10	6	0.77396	0.84532	0.999995	595	1	0.13261	0.4081	0.62737	0.998381	433	2	0.13261
Ctnnbl1	6	0.1429	0.32232	0.999995	191	2	0.034741	0.40818	0.62748	0.998381	434	3	0.034741
Ncapg2	6	0.68476	0.80537	0.999995	564	2	0.020794	0.40922	0.62873	0.998381	435	3	0.020794
Tspyl1	6	0.038012	0.11856	0.999995	73	4	-0.25124	0.41404	0.6322	0.998381	436	2	-0.25124
Rsl1d1	6	0.13646	0.31437	0.999995	184	2	0.01947	0.41491	0.63261	0.998381	437	1	0.01947
NCsgRNA_52	1	0.58356	0.58463	0.999995	500	0	0.064615	0.41644	0.41654	0.998381	438	0	0.064615
Vrk1	6	0.22729	0.42444	0.999995	256	2	0.011759	0.41781	0.63456	0.998381	439	2	0.011759
Mre11a	6	0.027196	0.094528	0.999995	54	5	-0.60298	0.42645	0.63944	0.998381	440	1	-0.60298
Serpinh1	6	0.44894	0.64279	0.999995	422	2	0.0027463	0.4274	0.64001	0.998381	441	2	0.0027463
Nono	6	0.04874	0.14249	0.999995	87	3	-0.21619	0.4293	0.64103	0.998381	442	2	-0.21619
Poldip3	6	0.18815	0.37746	0.999995	224	3	-0.17605	0.43055	0.64172	0.998381	443	2	-0.17605
D8Ertd738e	6	0.08328	0.21371	0.999995	127	3	-0.19742	0.43214	0.64269	0.998381	444	2	-0.19742
NCsgRNA_7	1	0.56766	0.56859	0.999995	486	0	0.069015	0.43234	0.4323	0.998381	445	0	0.069015
Ddx27	6	0.53092	0.69561	0.999995	468	2	-0.044843	0.43403	0.64382	0.998381	446	1	-0.044843
Arl6ip4	6	0.67672	0.79941	0.999995	558	2	-0.021978	0.43663	0.64549	0.998381	447	2	-0.021978
Atm	6	0.30213	0.51035	0.999995	317	2	0.052446	0.43724	0.64586	0.998381	448	2	0.052446
NCsgRNA_59	1	0.5616	0.56247	0.999995	484	0	0.043901	0.4384	0.43861	0.998381	449	0	0.043901
Sdad1	5	0.90845	0.90923	0.999995	648	0	-0.13618	0.44143	0.60998	0.998381	450	1	-0.13618
Rpp38	6	0.56176	0.71681	0.999995	485	2	-0.099512	0.44452	0.64991	0.998381	451	2	-0.099512
Rpl18	6	0.084536	0.21622	0.999995	130	4	-0.44005	0.44816	0.65194	0.998381	452	2	-0.44005
Hdac1	6	0.94085	0.93987	0.999995	667	0	0.047566	0.45238	0.65471	0.998381	453	2	0.047566
Bub3	6	0.5281	0.69385	0.999995	464	2	-0.088093	0.45445	0.65615	0.998381	454	2	-0.088093
Zfc3h1	6	0.027951	0.096594	0.999995	56	4	-0.48243	0.4554	0.65673	0.998381	455	2	-0.48243
NCsgRNA_56	1	0.5414	0.54132	0.999995	475	0	0.035666	0.4586	0.45857	0.998381	456	0	0.035666
NCsgRNA_45	1	0.54115	0.54111	0.999995	473	0	0.053413	0.45885	0.45884	0.998381	457	0	0.053413
Psmc3ip	6	0.1236	0.29098	0.999995	174	4	-0.15544	0.45961	0.65936	0.998381	458	2	-0.15544
Mybbp1a	6	0.05788	0.16114	0.999995	99	4	-0.65235	0.46263	0.6612	0.998381	459	1	-0.65235
Ddx31	6	0.27806	0.48379	0.999995	301	3	-0.07562	0.46442	0.66225	0.998381	460	2	-0.07562
Rplp2	6	0.029963	0.10119	0.999995	58	4	-0.76716	0.46562	0.66295	0.998381	461	2	-0.76716
Slx9	6	0.046199	0.13697	0.999995	81	4	-0.33883	0.4707	0.66609	0.998381	462	1	-0.33883
Exosc7	6	0.46892	0.65596	0.999995	430	2	-0.17407	0.47159	0.66657	0.998381	463	2	-0.17407
NCsgRNA_21	1	0.52373	0.52391	0.999995	460	0	0.018939	0.47627	0.4762	0.998381	464	0	0.018939
Hspe1	6	0.20083	0.39195	0.999995	238	3	-0.35404	0.47867	0.67057	0.998381	465	1	-0.35404
Trmt1l	6	0.091965	0.23028	0.999995	139	3	-0.22445	0.48043	0.67163	0.998381	466	1	-0.22445
NCsgRNA_10	1	0.51893	0.51865	0.999995	455	0	0.016948	0.48107	0.48095	0.998381	467	0	0.016948
Plec	6	0.4707	0.6571	0.999995	431	1	-0.13724	0.48172	0.67252	0.998381	468	2	-0.13724
Nop9	6	0.32684	0.53824	0.999995	337	2	0.0012896	0.48306	0.67336	0.998381	469	1	0.0012896
NCsgRNA_65	1	0.51616	0.51586	0.999995	450	0	0.0139	0.48384	0.48373	0.998381	470	0	0.0139
Ldha	5	0.35581	0.53554	0.999995	362	1	-0.093982	0.48432	0.64342	0.998381	471	2	-0.093982
Hspa9	6	0.30549	0.51408	0.999995	320	1	0.11083	0.48883	0.67642	0.999995	472	2	0.11083
Nol9	6	0.14894	0.32988	0.999995	197	3	-0.30625	0.4906	0.67746	0.999995	473	2	-0.30625
Ewsr1	6	0.033667	0.10934	0.999995	63	3	-0.48474	0.49603	0.68077	0.999995	474	2	-0.48474
Rpl6	5	0.10789	0.24349	0.999995	157	3	-0.39448	0.49618	0.65264	0.998381	475	1	-0.39448
Rtcb	6	0.14821	0.32903	0.999995	195	3	-0.13477	0.49689	0.68135	0.999995	476	1	-0.13477
NCsgRNA_34	1	0.50202	0.50209	0.999995	443	0	0.0025521	0.49798	0.4978	0.998381	477	0	0.0025521
NCsgRNA_9	1	0.50177	0.5018	0.999995	442	0	0.0021866	0.49823	0.49795	0.998381	478	0	0.0021866
Got2	6	0.66468	0.79107	0.999995	542	2	-0.028531	0.49942	0.68296	0.999995	479	2	-0.028531
Septin2	6	0.55338	0.71073	0.999995	479	2	-0.078706	0.50537	0.68644	0.999995	480	1	-0.078706
NCsgRNA_44	1	0.49394	0.49363	0.999995	441	0	-0.0069597	0.50606	0.50605	0.998381	481	0	-0.0069597
Dnmt1	6	0.68523	0.80567	0.999995	566	2	0.079631	0.50703	0.6874	0.999995	482	2	0.079631
Rpl8	5	0.19088	0.3636	0.999995	226	3	-0.31082	0.5081	0.66225	0.998381	483	2	-0.31082
Ddx56	6	0.016277	0.059506	0.999995	39	5	-0.57277	0.51124	0.68993	0.999995	484	1	-0.57277
NCsgRNA_26	1	0.48763	0.48754	0.999995	436	0	-0.0088979	0.51237	0.51226	0.998381	485	0	-0.0088979
Rpl24	6	0.10602	0.25747	0.999995	153	4	-0.38832	0.5154	0.69259	0.999995	486	2	-0.38832
Ran	5	0.80529	0.82805	0.999995	607	1	0.31386	0.51554	0.66797	0.998381	487	2	0.31386
Rpl30	5	0.11906	0.25982	0.999995	171	3	-0.92549	0.51605	0.6684	0.998381	488	2	-0.92549
Blm	6	0.088693	0.2239	0.999995	134	3	-0.24051	0.51806	0.69435	0.999995	489	2	-0.24051
NCsgRNA_47	1	0.48056	0.48052	0.999995	433	0	-0.028529	0.51944	0.51923	0.998381	490	0	-0.028529
Nat10	6	0.03032	0.10191	0.999995	59	4	-0.47593	0.52035	0.69575	0.999995	491	1	-0.47593
Rpl21	5	0.14119	0.2918	0.999995	189	3	-0.46759	0.5206	0.67219	0.998381	492	2	-0.46759
Rbm28	6	0.26952	0.47369	0.999995	294	2	-0.06691	0.52444	0.69815	0.999995	493	2	-0.06691
Exosc1	6	0.70821	0.82316	0.999995	579	2	-0.022716	0.52525	0.69878	0.999995	494	1	-0.022716
Nop14	6	0.11897	0.2821	0.999995	170	3	-0.23589	0.52607	0.6992	0.999995	495	1	-0.23589
Hnrnph1	6	0.26544	0.46917	0.999995	292	3	-0.13395	0.52688	0.69981	0.999995	496	2	-0.13395
Zmat2	6	0.23744	0.43659	0.999995	264	2	0.013171	0.52957	0.70171	0.999995	497	2	0.013171
NCsgRNA_28	1	0.46768	0.46734	0.999995	429	0	-0.023642	0.53232	0.5322	0.998381	498	0	-0.023642
NCsgRNA_55	1	0.46743	0.46706	0.999995	428	0	-0.027515	0.53257	0.5324	0.998381	499	0	-0.027515
Hadh	6	0.26404	0.46755	0.999995	291	2	0.01886	0.53415	0.70439	0.999995	500	2	0.01886
Npm1	6	0.2428	0.44293	0.999995	267	3	-0.37232	0.53813	0.70703	0.999995	501	2	-0.37232
Dis3	6	0.11857	0.28141	0.999995	169	4	-0.23242	0.53984	0.70805	0.999995	502	2	-0.23242
Rpl35	6	0.91441	0.91504	0.999995	653	1	-0.14396	0.54154	0.70905	0.999995	503	2	-0.14396
Pcsk9	6	0.1535	0.3355	0.999995	202	1	-0.0073285	0.54437	0.71096	0.999995	504	2	-0.0073285
Cebpz	6	0.22313	0.4191	0.999995	252	2	0.049172	0.54603	0.71211	0.999995	505	2	0.049172
Imp4	6	0.25906	0.46225	0.999995	284	3	-0.21642	0.55058	0.71478	0.999995	506	2	-0.21642
Snrpd2	6	0.093343	0.23311	0.999995	141	4	-0.55586	0.55072	0.71486	0.999995	507	2	-0.55586
Gnl3l	6	0.2488	0.44989	0.999995	275	3	-0.094573	0.55226	0.71603	0.999995	508	2	-0.094573
Sf3a3	5	0.11791	0.25792	0.999995	167	3	-0.78636	0.55257	0.69902	0.999995	509	2	-0.78636
Dusp11	6	0.39991	0.61283	0.999995	389	2	-0.052833	0.5569	0.71915	0.999995	510	1	-0.052833
Ddx41	6	0.2633	0.46674	0.999995	289	3	-0.28362	0.56231	0.72289	0.999995	511	2	-0.28362
Nob1	6	0.10611	0.25777	0.999995	154	3	-0.19768	0.56453	0.72417	0.999995	512	2	-0.19768
NCsgRNA_24	1	0.43461	0.4347	0.999995	411	0	-0.045079	0.56539	0.56627	0.998381	513	0	-0.045079
Xrcc1	6	0.82426	0.86409	0.999995	613	1	0.08798	0.5668	0.72558	0.999995	514	2	0.08798
Gpatch4	6	0.70506	0.82089	0.999995	577	2	0.018987	0.56756	0.72617	0.999995	515	2	0.018987
Rcc2	6	0.55674	0.71319	0.999995	481	2	-0.19663	0.56981	0.72785	0.999995	516	1	-0.19663
NCsgRNA_8	1	0.42653	0.42668	0.999995	406	0	-0.078391	0.57347	0.57414	0.998381	517	0	-0.078391
Rpl39	4	0.33284	0.47726	0.999995	343	2	-0.44226	0.57376	0.67105	0.998381	518	1	-0.44226
Cdk9	6	0.31771	0.52841	0.999995	330	3	-0.16198	0.57611	0.73213	0.999995	519	2	-0.16198
Sf3b6	6	0.67193	0.79596	0.999995	551	2	0.039684	0.57652	0.7324	0.999995	520	2	0.039684
Dhx8	6	0.24234	0.44223	0.999995	266	3	-0.1853	0.57726	0.73288	0.999995	521	1	-0.1853
Snrpc	6	0.030422	0.10211	0.999995	60	4	-0.34355	0.57775	0.73316	0.999995	522	2	-0.34355
Tra2b	6	0.59683	0.74121	0.999995	508	1	-0.049238	0.58167	0.73573	0.999995	523	1	-0.049238
Nop56	6	0.022609	0.079824	0.999995	47	3	-0.32146	0.58241	0.73621	0.999995	524	2	-0.32146
Pak1ip1	6	0.44089	0.63815	0.999995	416	2	-0.096507	0.58646	0.73906	0.999995	525	2	-0.096507
NCsgRNA_19	1	0.41214	0.41225	0.999995	397	0	-0.093511	0.58786	0.58887	0.998381	526	0	-0.093511
NCsgRNA_54	1	0.41164	0.41184	0.999995	396	0	-0.0976	0.58836	0.5893	0.998381	527	0	-0.0976
Rps2	5	0.97022	0.97133	0.999995	692	0	0.1288	0.58899	0.72861	0.999995	528	2	0.1288
Vdac1	6	0.10905	0.26365	0.999995	159	2	0.052822	0.58916	0.74087	0.999995	529	2	0.052822
NCsgRNA_16	1	0.4028	0.40287	0.999995	391	0	-0.075374	0.5972	0.59853	0.998381	530	0	-0.075374
Cct2	5	0.086304	0.21118	0.999995	132	3	-0.36359	0.59893	0.73669	0.999995	531	1	-0.36359
Zcchc9	6	0.0038003	0.017052	0.540663	21	5	-0.41882	0.59895	0.74708	0.999995	532	1	-0.41882
H2ax	6	0.036837	0.11587	0.999995	68	4	-0.48859	0.60107	0.74868	0.999995	533	1	-0.48859
Apex1	6	0.11454	0.2741	0.999995	162	3	-0.069367	0.60308	0.75012	0.999995	534	2	-0.069367
Api5	6	0.045514	0.13521	0.999995	79	4	-0.43531	0.60458	0.75094	0.999995	535	1	-0.43531
Hsd17b4	6	0.537	0.69968	0.999995	469	2	-0.035401	0.6052	0.75133	0.999995	536	2	-0.035401
Pcna	5	0.31765	0.50573	0.999995	329	2	-0.080155	0.61094	0.74689	0.999995	537	1	-0.080155
Pum3	5	0.049797	0.14135	0.999995	89	3	-0.31147	0.61213	0.74765	0.999995	538	1	-0.31147
Rps13	6	0.051048	0.14741	0.999995	90	4	-0.80021	0.61564	0.75862	0.999995	539	1	-0.80021
Csnk2b	6	0.51168	0.68267	0.999995	448	2	0.012611	0.61885	0.76067	0.999995	540	2	0.012611
Llph	6	0.091666	0.22972	0.999995	136	3	-0.11713	0.62145	0.76248	0.999995	541	2	-0.11713
NCsgRNA_43	1	0.37831	0.37881	0.999995	380	0	-0.1328	0.62169	0.62356	0.998381	542	0	-0.1328
Atr	6	0.81776	0.8611	0.999995	611	1	0.035454	0.63108	0.7688	0.999995	543	2	0.035454
Tmem127	6	0.61781	0.75631	0.999995	518	2	0.05928	0.63173	0.76938	0.999995	544	2	0.05928
Rpl13a	6	0.012198	0.045631	0.977042	32	5	-0.53087	0.63502	0.77156	0.999995	545	1	-0.53087
Ppp1ca	6	0.22556	0.42219	0.999995	254	3	-0.064927	0.63887	0.77447	0.999995	546	2	-0.064927
Gtf2f2	6	0.37194	0.58837	0.999995	373	3	-0.1049	0.63892	0.7745	0.999995	547	1	-0.1049
Noc4l	6	0.27503	0.4802	0.999995	299	2	0.050175	0.6419	0.77666	0.999995	548	2	0.050175
Rpl12	5	0.36902	0.54606	0.999995	371	2	-0.39635	0.64415	0.76501	0.999995	549	1	-0.39635
Rbmy	6	0.014553	0.053893	0.999995	35	4	-0.75334	0.64472	0.7786	0.999995	550	1	-0.75334
Pelp1	6	0.13672	0.31478	0.999995	186	3	-0.30117	0.64492	0.77875	0.999995	551	2	-0.30117
Ddx39b	6	0.20662	0.39936	0.999995	241	3	-0.35139	0.64536	0.77905	0.999995	552	1	-0.35139
NCsgRNA_15	1	0.35281	0.35353	0.999995	360	1	-0.12027	0.64719	0.65	0.998381	553	0	-0.12027
Khdrbs1	6	0.13889	0.31764	0.999995	188	2	0.020538	0.6479	0.78094	0.999995	554	2	0.020538
Hspa8	6	0.053481	0.15233	0.999995	94	4	-0.54394	0.64842	0.78126	0.999995	555	2	-0.54394
Nmd3	6	0.93121	0.92971	0.999995	661	1	0.12817	0.64991	0.78245	0.999995	556	2	0.12817
Vdac2	6	0.17793	0.36511	0.999995	219	3	-0.1282	0.65169	0.78348	0.999995	557	1	-0.1282
Prpf19	6	0.12557	0.29481	0.999995	176	3	-0.10697	0.65339	0.78482	0.999995	558	2	-0.10697
Ruvbl2	6	0.23202	0.43025	0.999995	261	1	0.10985	0.65358	0.78494	0.999995	559	2	0.10985
Luc7l2	6	0.25008	0.45141	0.999995	278	2	0.022107	0.65483	0.78591	0.999995	560	2	0.022107
Rps23	6	0.24556	0.44623	0.999995	272	3	-0.20065	0.65487	0.78593	0.999995	561	2	-0.20065
Rpl36a	6	0.67624	0.79916	0.999995	557	2	-0.12102	0.65545	0.78627	0.999995	562	2	-0.12102
Zcrb1	6	0.40974	0.61869	0.999995	395	2	0.0097478	0.65607	0.78667	0.999995	563	1	0.0097478
Utp3	6	0.63957	0.77195	0.999995	528	1	0.012448	0.66126	0.79068	0.999995	564	2	0.012448
Banf1	6	0.32808	0.53957	0.999995	339	2	-0.25947	0.6637	0.79238	0.999995	565	2	-0.25947
Ppan	6	0.44059	0.63795	0.999995	415	2	0.024787	0.66468	0.79311	0.999995	566	2	0.024787
Rpl32	6	0.21978	0.41493	0.999995	249	2	0.012696	0.66713	0.79465	0.999995	567	2	0.012696
Eef1a2	6	0.62643	0.76213	0.999995	520	1	0.041891	0.66904	0.79583	0.999995	568	2	0.041891
Septin11	6	0.40852	0.61803	0.999995	394	2	-0.008477	0.67193	0.79776	0.999995	569	2	-0.008477
Rps27	5	0.084861	0.20873	0.999995	131	3	-1.2267	0.67454	0.77547	0.999995	570	1	-1.2267
Hnrnpl	6	0.0034305	0.015688	0.540663	20	4	-0.47847	0.67552	0.80041	0.999995	571	1	-0.47847
Rpp30	6	0.52281	0.68998	0.999995	459	2	-0.010766	0.68288	0.80529	0.999995	572	2	-0.010766
Cdk7	6	0.587	0.73465	0.999995	501	2	-0.020334	0.68523	0.80706	0.999995	573	2	-0.020334
Parn	6	0.10731	0.26031	0.999995	155	4	-0.5471	0.69063	0.81095	0.999995	574	1	-0.5471
Tex10	6	0.045753	0.13585	0.999995	80	3	-0.27301	0.69177	0.81194	0.999995	575	1	-0.27301
NCsgRNA_38	1	0.30737	0.30764	0.999995	323	1	-0.15307	0.69263	0.69384	0.999995	576	0	-0.15307
Nop2	6	0.25205	0.4539	0.999995	280	3	-0.20485	0.6929	0.81266	0.999995	577	1	-0.20485
NCsgRNA_62	1	0.30687	0.30715	0.999995	322	1	-0.14589	0.69313	0.6942	0.999995	578	0	-0.14589
U2af2	6	0.060207	0.16638	0.999995	103	4	-0.61897	0.69362	0.81325	0.999995	579	2	-0.61897
Smndc1	6	0.035239	0.11262	0.999995	65	4	-0.34087	0.69572	0.81482	0.999995	580	1	-0.34087
Eif2ak2	6	0.66077	0.78807	0.999995	540	2	0.071474	0.69823	0.8165	0.999995	581	2	0.071474
Myh9	6	0.018175	0.065712	0.999995	41	4	-0.53769	0.7013	0.81896	0.999995	582	1	-0.53769
Tent4b	6	0.037358	0.11709	0.999995	70	4	-0.14599	0.70142	0.81907	0.999995	583	2	-0.14599
Wdr3	6	0.50957	0.68125	0.999995	446	1	0.065019	0.7037	0.82056	0.999995	584	2	0.065019
Sppl3	6	0.00078556	0.004027	0.225512	13	4	-0.44762	0.7057	0.82207	0.999995	585	1	-0.44762
Septin7	6	0.34172	0.5549	0.999995	352	2	0.016328	0.70596	0.82229	0.999995	586	2	0.016328
Rpl5	6	0.59722	0.74148	0.999995	509	2	0.033036	0.70734	0.8232	0.999995	587	1	0.033036
Dimt1	6	0.93055	0.92899	0.999995	660	1	0.10392	0.70866	0.82403	0.999995	588	2	0.10392
Riox2	6	0.089616	0.22559	0.999995	135	2	0.063094	0.71112	0.82599	0.999995	589	2	0.063094
Cdc73	6	0.051135	0.14763	0.999995	91	3	-0.30939	0.71269	0.82706	0.999995	590	2	-0.30939
Stxbp1	6	0.11746	0.27941	0.999995	166	2	-0.043295	0.71313	0.82733	0.999995	591	2	-0.043295
NCsgRNA_30	1	0.28137	0.28163	0.999995	303	1	-0.23609	0.71863	0.71985	0.999995	592	0	-0.23609
Tma7	6	0.079767	0.20685	0.999995	122	1	0.034382	0.72064	0.8325	0.999995	593	2	0.034382
Hnrnpu	6	0.026939	0.093827	0.999995	53	5	-0.76486	0.72535	0.836	0.999995	594	1	-0.76486
Aatf	6	0.19974	0.39062	0.999995	235	3	-0.13338	0.72544	0.83607	0.999995	595	2	-0.13338
Arpc1b	6	0.011762	0.043961	0.969806	31	4	-0.39844	0.72638	0.83671	0.999995	596	1	-0.39844
Ppih	6	0.037365	0.1171	0.999995	71	4	-0.4523	0.73104	0.84018	0.999995	597	2	-0.4523
Rack1	6	0.048016	0.14105	0.999995	85	2	0.0071936	0.738	0.84233	0.999995	598	1	0.0071936
Hnrnpdl	6	0.019307	0.06922	0.999995	42	3	-0.15023	0.74048	0.843	0.999995	599	1	-0.15023
Rrp1	5	0.35561	0.53537	0.999995	361	2	-0.055549	0.75878	0.80919	0.999995	600	1	-0.055549
Nkrf	6	0.27592	0.48134	0.999995	300	2	-0.034038	0.75955	0.84842	0.999995	601	1	-0.034038
Eef2	6	0.77831	0.8469	0.999995	597	1	-0.04825	0.76001	0.84853	0.999995	602	1	-0.04825
H4c1	6	0.078177	0.20357	0.999995	119	4	-0.43769	0.76595	0.85021	0.999995	603	1	-0.43769
Rps6	6	0.15235	0.33403	0.999995	201	3	-0.23418	0.7682	0.85078	0.999995	604	1	-0.23418
Rbm39	6	0.3282	0.53964	0.999995	340	3	-0.095196	0.76909	0.85109	0.999995	605	1	-0.095196
Sbds	6	0.89958	0.90451	0.999995	643	1	-0.032778	0.76954	0.85127	0.999995	606	1	-0.032778
Arpc3	6	0.1428	0.32223	0.999995	190	3	-0.18564	0.77701	0.85376	0.999995	607	1	-0.18564
Eif4a1	5	0.1562	0.31363	0.999995	204	3	-0.27758	0.78098	0.82053	0.999995	608	1	-0.27758
Vim	6	0.14631	0.32655	0.999995	194	3	-0.20069	0.78429	0.85594	0.999995	609	1	-0.20069
NCsgRNA_42	1	0.21295	0.21245	0.999995	245	1	-0.24549	0.78705	0.78911	0.999995	610	0	-0.24549
Ddx1	6	0.68758	0.80737	0.999995	568	2	0.052613	0.7893	0.85762	0.999995	611	1	0.052613
Hspa5	6	0.1025	0.2507	0.999995	149	4	-0.59817	0.79218	0.85848	0.999995	612	1	-0.59817
Rpl3	5	0.51874	0.6677	0.999995	453	1	0.043367	0.79626	0.82831	0.999995	613	1	0.043367
Serf2	6	0.0060098	0.024918	0.697703	25	4	-0.41599	0.80023	0.86096	0.999995	614	1	-0.41599
NCsgRNA_63	1	0.19806	0.19751	0.999995	233	1	-0.22912	0.80194	0.80404	0.999995	615	0	-0.22912
Ddx23	6	0.82067	0.86247	0.999995	612	1	0.095272	0.80298	0.86195	0.999995	616	1	0.095272
Topbp1	6	0.33777	0.55077	0.999995	347	3	-0.1444	0.81256	0.86522	0.999995	617	1	-0.1444
Ccdc86	5	0.25111	0.44764	0.999995	279	3	-0.16738	0.81758	0.84023	0.999995	618	1	-0.16738
Rbm34	6	0.43298	0.6331	0.999995	409	2	0.059272	0.83901	0.87573	0.999995	619	1	0.059272
Tubb5	6	0.28627	0.49237	0.999995	306	2	-0.15526	0.83967	0.87601	0.999995	620	1	-0.15526
Noc2l	6	0.034159	0.11024	0.999995	64	4	-0.37648	0.84646	0.87911	0.999995	621	1	-0.37648
Chd3	6	0.57993	0.72964	0.999995	497	2	-0.037157	0.8471	0.87945	0.999995	622	1	-0.037157
Fcf1	6	0.072125	0.19108	0.999995	109	4	-0.29595	0.84805	0.87994	0.999995	623	1	-0.29595
Rpp25	6	0.12558	0.29488	0.999995	177	4	-0.14337	0.85394	0.88258	0.999995	624	1	-0.14337
Dcaf13	6	0.080619	0.20866	0.999995	123	3	-0.65517	0.85454	0.88284	0.999995	625	1	-0.65517
Tasp1	6	0.036543	0.11533	0.999995	66	2	0.0036237	0.85785	0.88449	0.999995	626	1	0.0036237
Snrpd3	6	0.54776	0.70695	0.999995	477	2	-0.14256	0.86052	0.88579	0.999995	627	1	-0.14256
NCsgRNA_25	1	0.13822	0.13872	0.999995	187	1	-0.34494	0.86178	0.86283	0.999995	628	0	-0.34494
NCsgRNA_13	1	0.13671	0.13722	0.999995	185	1	-0.37234	0.86329	0.86444	0.999995	629	0	-0.37234
Rps27a	6	0.2873	0.4935	0.999995	307	2	-0.19426	0.86656	0.88876	0.999995	630	1	-0.19426
Trmt112	6	0.054416	0.15409	0.999995	97	4	-0.47192	0.86965	0.89042	0.999995	631	1	-0.47192
Rpl17	5	0.27898	0.47546	0.999995	302	2	-0.11515	0.87034	0.87546	0.999995	632	1	-0.11515
Snrpa1	6	0.33406	0.54663	0.999995	344	3	-0.16439	0.87563	0.89352	0.999995	633	1	-0.16439
Cct4	4	0.07221	0.16347	0.999995	110	3	-0.54244	0.8781	0.87823	0.999995	634	0	-0.54244
Lmnb1	5	0.15864	0.31709	0.999995	207	3	-0.17735	0.87896	0.88274	0.999995	635	1	-0.17735
Anln	6	0.53927	0.70123	0.999995	471	2	0.011372	0.88009	0.8957	0.999995	636	1	0.011372
Rpl15	6	0.02627	0.091465	0.999995	52	3	-1.0068	0.88342	0.89724	0.999995	637	1	-1.0068
Ddb1	6	0.082308	0.21186	0.999995	126	4	-0.26311	0.88392	0.89745	0.999995	638	1	-0.26311
Numa1	6	0.20489	0.39708	0.999995	240	3	-0.21766	0.88567	0.89848	0.999995	639	1	-0.21766
Rps18	6	0.20238	0.39408	0.999995	239	3	-0.18813	0.88935	0.90063	0.999995	640	1	-0.18813
H2bc1	6	0.10783	0.2613	0.999995	156	4	-0.27289	0.8941	0.90356	0.999995	641	1	-0.27289
Alyref	6	0.11719	0.27886	0.999995	165	4	-0.27011	0.89503	0.90413	0.999995	642	1	-0.27011
NCsgRNA_17	1	0.1049	0.10554	0.999995	151	1	-0.45905	0.8951	0.89621	0.999995	643	0	-0.45905
Rps12	5	0.19557	0.37022	0.999995	231	3	-0.32796	0.89546	0.89647	0.999995	644	1	-0.32796
H1f10	6	0.13521	0.31208	0.999995	183	4	-0.1119	0.89595	0.90463	0.999995	645	1	-0.1119
Rfc4	6	0.34536	0.55878	0.999995	355	3	-0.26061	0.89846	0.90624	0.999995	646	1	-0.26061
3110082I17Rik	6	0.091917	0.23021	0.999995	138	4	-0.1797	0.89891	0.90644	0.999995	647	1	-0.1797
Eif2a	6	0.024209	0.084745	0.999995	50	3	-0.25967	0.90002	0.90717	0.999995	648	1	-0.25967
Incenp	6	0.35661	0.5708	0.999995	365	2	0.0035357	0.90179	0.90821	0.999995	649	1	0.0035357
Exosc8	6	0.12352	0.29078	0.999995	173	3	-0.24935	0.90396	0.90968	0.999995	650	1	-0.24935
NCsgRNA_3	1	0.095304	0.095902	0.999995	145	1	-0.47345	0.9047	0.90554	0.999995	651	0	-0.47345
Rae1	6	0.019927	0.071364	0.999995	44	4	-0.52075	0.90524	0.91043	0.999995	652	1	-0.52075
Eif2s2	6	0.57504	0.72615	0.999995	494	1	0.016663	0.90651	0.91126	0.999995	653	1	0.016663
Tcerg1	6	0.0046799	0.020056	0.584029	24	4	-0.46557	0.90672	0.91141	0.999995	654	1	-0.46557
Rcc1	6	0.49178	0.66984	0.999995	438	2	0.041683	0.90776	0.91212	0.999995	655	1	0.041683
Pdlim7	6	0.57282	0.72447	0.999995	490	2	0.016542	0.909	0.9128	0.999995	656	1	0.016542
Ddx24	5	0.15754	0.31555	0.999995	206	3	-0.18505	0.90974	0.91053	0.999995	657	0	-0.18505
Rpl36	5	0.82584	0.84126	0.999995	614	1	-0.017108	0.91549	0.91652	0.999995	658	0	-0.017108
Parp1	6	0.34131	0.55449	0.999995	351	3	-0.16254	0.91616	0.91799	0.999995	659	1	-0.16254
NCsgRNA_12	1	0.081671	0.082195	0.999995	125	1	-0.94611	0.91833	0.91884	0.999995	660	0	-0.94611
Kdm2a	6	0.41281	0.62073	0.999995	398	2	-0.013427	0.91862	0.92012	0.999995	661	1	-0.013427
Gnl2	6	0.2211	0.41657	0.999995	251	3	-0.36428	0.91899	0.9204	0.999995	662	1	-0.36428
Spats2l	6	0.46202	0.6517	0.999995	427	2	-3.3677e-05	0.92301	0.9234	0.999995	663	1	-3.3677e-05
Coil	6	0.058234	0.16185	0.999995	100	4	-0.31265	0.92337	0.92364	0.999995	664	1	-0.31265
Gar1	6	0.88691	0.89614	0.999995	638	1	0.0049634	0.92496	0.92499	0.999995	665	1	0.0049634
Utp18	6	0.29501	0.50214	0.999995	313	3	-0.27527	0.92856	0.9277	0.999995	666	1	-0.27527
Rrp8	6	0.047295	0.13946	0.999995	84	3	-0.15244	0.92956	0.92857	0.999995	667	1	-0.15244
Ebna1bp2	6	0.023135	0.081721	0.999995	48	4	-0.64166	0.93121	0.93026	0.999995	668	1	-0.64166
Rsl24d1	5	0.25503	0.45286	0.999995	281	2	-0.17401	0.93144	0.93283	0.999995	669	0	-0.17401
Rbm27	6	0.021056	0.074764	0.999995	46	5	-0.50014	0.9325	0.93131	0.999995	670	1	-0.50014
Rnf40	6	0.59615	0.74067	0.999995	507	2	-0.066367	0.93686	0.93574	0.999995	671	1	-0.066367
Npm3	6	0.053236	0.152	0.999995	93	4	-0.3201	0.94085	0.93988	0.999995	672	1	-0.3201
Dhx33	6	0.10118	0.2484	0.999995	147	4	-0.40749	0.94099	0.93999	0.999995	673	1	-0.40749
Rpl7	4	0.40344	0.54811	0.999995	392	2	-0.44978	0.94144	0.94061	0.999995	674	0	-0.44978
Cenpb	6	0.24646	0.44732	0.999995	273	2	-0.06454	0.9417	0.94079	0.999995	675	1	-0.06454
Ngdn	6	0.23731	0.43645	0.999995	263	3	-0.23652	0.94407	0.94314	0.999995	676	0	-0.23652
Ddx51	6	0.0077314	0.030857	0.724646	29	5	-0.65945	0.94741	0.94672	0.999995	677	0	-0.65945
Bccip	6	0.30995	0.51938	0.999995	325	1	0.015903	0.94883	0.94823	0.999995	678	0	0.015903
Anp32e	6	0.054031	0.15353	0.999995	95	3	-0.21904	0.94983	0.9493	0.999995	679	0	-0.21904
Uggt1	6	0.20749	0.40041	0.999995	243	3	-0.10608	0.95083	0.95036	0.999995	680	0	-0.10608
Rfc5	5	0.22705	0.41524	0.999995	255	3	-0.21046	0.95206	0.95295	0.999995	681	0	-0.21046
Pinx1	6	0.044541	0.13306	0.999995	77	4	-0.31751	0.95359	0.95304	0.999995	682	0	-0.31751
Sart3	5	0.24951	0.44567	0.999995	277	3	-0.25736	0.95424	0.95526	0.999995	683	0	-0.25736
[truncated: 45 more rows]

## Sheet: Table4 Nucleolomics
Supplementary Table 4, nucleolomics-targeted CRISPR screen data
[truncated: 729 more rows]

[truncated: 9 more sheets: Table5 IFNγ-DUB, Table6 DUB, Table7sgRNA and shRNA sequences, Table8 primer sequence, Table9 reagent, Table10 ERV, Table 11 ERV-encoded epitopes, Table 12 IP-Mass spectrometry, Table 13 drug screen]
