# Supplementary material for: Nucleolar stress-induced heterochromatin disengagement triggers tumour intrinsic immunogenicity
Source: Research Square preprint supplement (doi:10.21203/rs.3.rs-6101102/v1), 2025-03-06
Supplement: Supplementary file 2 [file ebdcbe33fcdc12e19707356a.pdf]

# Supplementary Figure 1

An example of the gating strategy for MHC-I expression

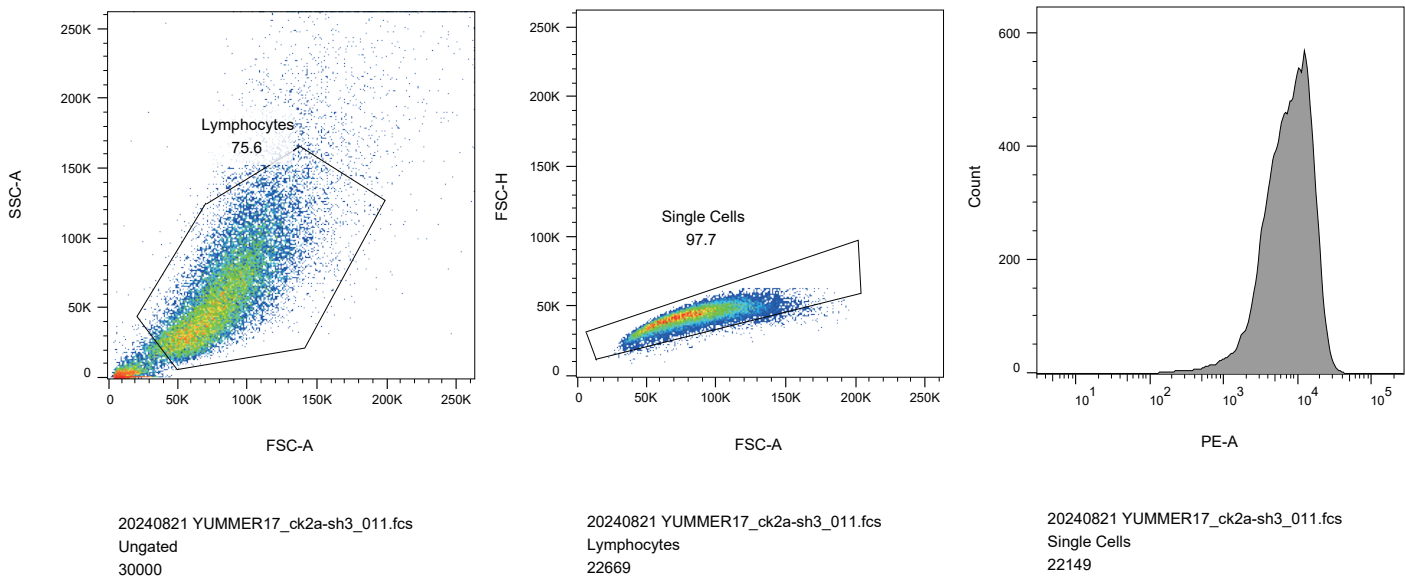

An example of the gating strategy for HLA-A/B/C expression

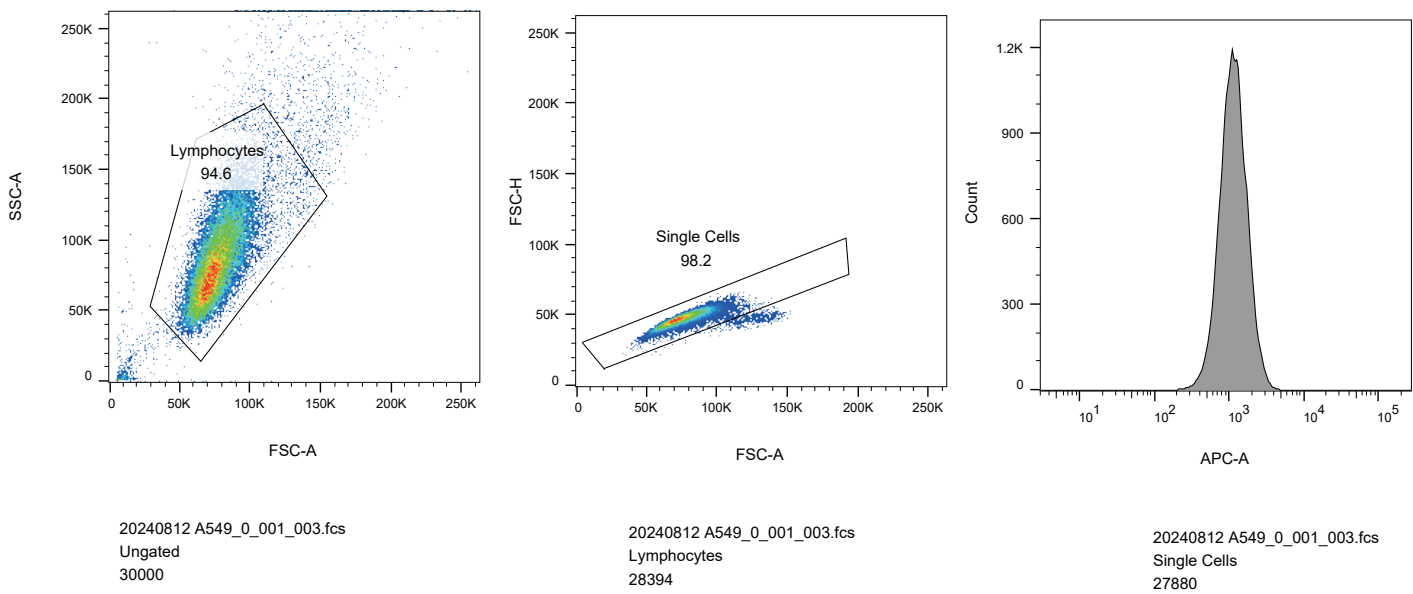

An example of the gating strategy for T cells.

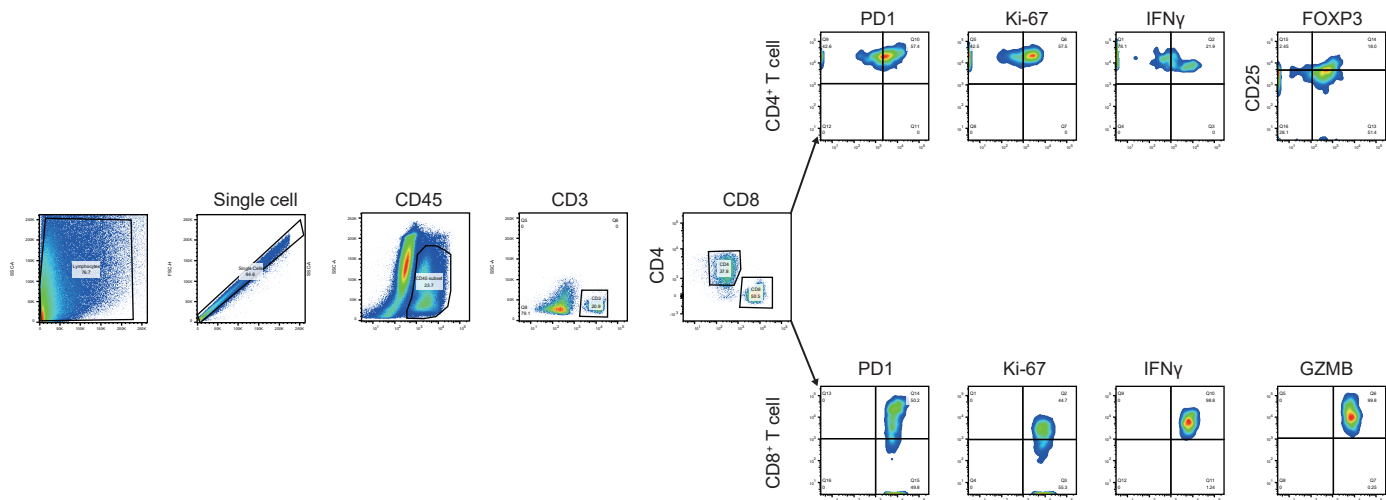

An example of the gating strategy for myeloids

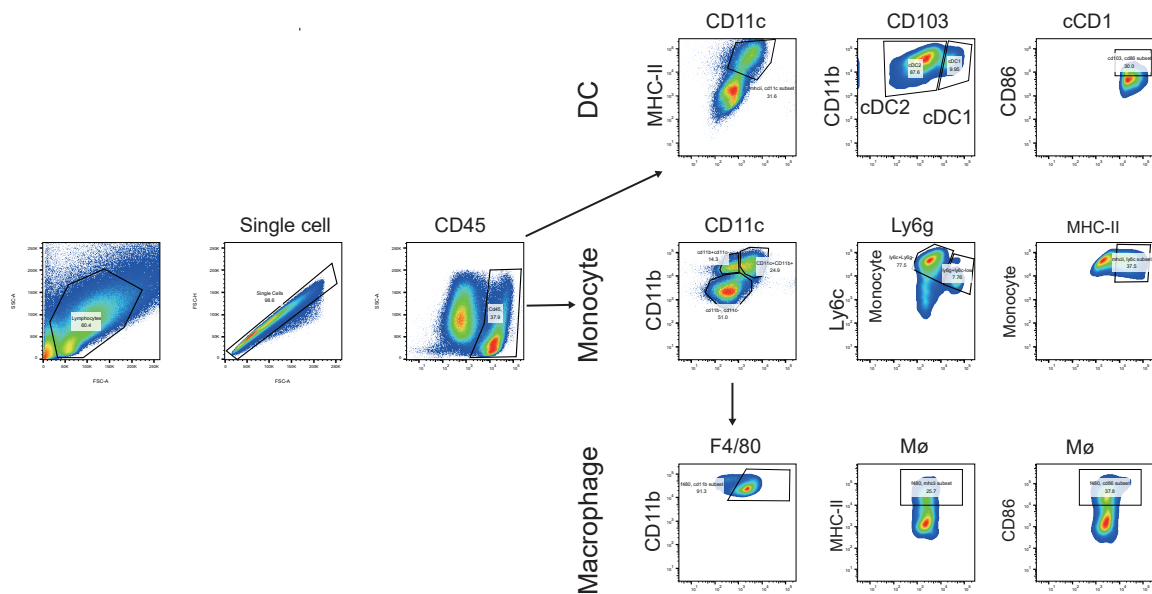

**Supplementary Fig.1 Gating Strategies (Flow cytometry).**  
Representative flow cytometry data with gating strategies. Similar results were obtained in at least n = 3 independent experiments.
